# Supplementary material for: Validation of COI metabarcoding primers for terrestrial arthropods
Source: PeerJ. 2019 Oct 7;7:e7745. doi: 10.7717/peerj.7745 (PMC6786254; doi:10.7717/peerj.7745)
Supplement: Table S1 [file peerj-07-7745-s021.xlsx]

## Sheet: info
	Table S1	Taxa present in the mock sample and OTU tables for the 21 tested primer sets as well as the 4 primer sets metabarcoded as a gradient PCR. See Braukmann et al. 2018 for details.
	A) Mock_sample_composition	Overview of the 374 taxa used in the mock community, including BOLD accession numbers.
	B) Run I: Mock sample	Raw sequence data metabarcoding 21 primer sets. Quality filtered reads mapped against the 374 reference sequences. Since the sequencing depth is not equal across samples, for many analysis relative abundance (with a % threshold) or subsampling was used. Sequences are sorted by average relative read abundance in each column.
	Sequ	Reference sequence the respective reads where matched to.
	Primer sets:	ID	Forward	Reverse	Targeted region in bp	length bias adjustment for the malaise trap sequencing run
		1	ZBJ-ArtF1c	ZBJ-ArtR2c	157	0.154972
		2	fwhF2	fwhR2n	205	0.166813
		3	LepF1	MLepF1-Rev	218	0.170854
		4	LCO1490	230_R	229	0.175095
		5	ArF5	ArR5	310	0.204819
		6	BF1	BR2	316	0.205738
		7	mlCOIintF	jgHCO2198	313	0.209498
		8	mlCOIintF	Fol-degen-rev	313	0.209978
		9	mlCOIintF-XT	jgHCO2198	313	0.209498
		10	LCO1490	Ill_C_R	325	0.21143
		11	MZplankF2	C_LepFolR	322	0.211919
		12	MhemF	dgHCO2198	403	0.26297
		13	MLepF1	C_LepFolR	407	0.264487
		14	BF3	BR2	418	0.266021
		15	BF2	BR2	421	0.268357
		16	Ill_B_F	HCO2198	418	0.271535
		17	ArF5	Fol-degen-rev	418	0.272342
		18	RonMWASPdeg	C_LepFolR	421	0.275616
		19	AncientLepF3	C_LepFolR	463	0.317623
		20	LCO1490	HCO2198	658	1
		21	dgLCO1490	dgHCO2198	658	0.96832
	C) Run II: Malaise trap	Malaise trap data, dereplicated reads in each sample mapped against a filtered BOLD reference database (Ontario Arthropoda, sequence length 648-668 bp, terminal Ns removed) with 99% identiy and singletons removed. Hits are collapsed for each BIN. A few specimens and no bin assigned, and where collapsed based on taxonomy. See primer set table above (B) for primer combinations, and length bias adju…
	D) Run III: Gradient	Raw metabarcoding data for the 4 primer sets run at a gradient using the mock sample (A). Quality filtered reads mapped against the 374 reference sequences. Since the sequencing depth is not equal across samples, for many analysis relative abundance (with a % threshold) or subsampling was used. Sequences are sorted by average relative read abundance in each column.

## Sheet: A) Mock_sample_composition
Process_ID	BIN	Order	Family	Subfamily	Species	RefSeqs
RRGCO236-15	BOLD:AAA5417	Lepidoptera	Notodontidae	Pygaerinae	Clostera albosigma	AACATTATATTTTATTTTTGGAATTTGAGCAGGAATAGTTGGAACCTCTTTAAGTTTATTAATTCGAGCTGAATTAGGAAATCCTGGATCTTTAATTGGAGATGATCAAATTTATAATACTATTGTTACAGCTCATGCTTTTATTATAATTTTTTTTATAGTTATACCTATTATAATTGGAGGATTTGGTAATTGATTAGTTCCTTTAATATTAGGAGCCCCTGATATAGCTTTTCCTCGAATAAATAATATAAGTTTTTGACTCCTACCCCCCTCATTAACTTTATTAATTTCAAGAAGAATTGTAGAAAATGGAGCAGGAACAGGATGAACAGTTTACCCCCCACTTTCATCTAATATTGCACATGGAGGAAGATCAGTTGATTTAGCTATTTTTTC…
RRMFG2297-15	BOLD:AAC6989	Coleoptera	Staphylinidae	Staphylininae	Ontholestes cingulatus	AATATTATATTTCATTTTTGGAATATGAGCTGGTATAATAGGAACTTCAATAAGATTAATTATTCGACTAGAACTAGGGAATCCCGGATTTTTAATTAATAATGATCAAATTTATAATTCCTTAGTAACTTCACATGCCTTCATCATAATTTTTTTTATAGTTATACCTATTATAATTGGAGGATTTGGTAATTGATTAATCCCTTTAATAATTGGGGCCCCTGATATAGCTTTCCCACGAATAAATAATATAAGATTTTGATTATTACCCCCTTCAATCTTTATTTTAATTTTAAGAAGAATAACAAACCAAGGAGCCGGAACTGGATGAACAGTTTATCCCCCTTTATCTCTCAATTTAAGACATGAAGGCATATCTATTGATTTAGCTATTTTTTC…
RRMFI4231-15	BOLD:ACW8623	Mecoptera	Panorpidae		Panorpa	AACTTTATATTTTATTTTCGGAGCATGATCCGGAATAATTGGAACTTCATTAAGAATTTTAATTCGAACTGAATTAGGACATCCTGGTTCATTAATTGGTGATGATCAAATTTATAATGTAATTGTTACAGCTCATGCATTTATTATAATTTTTTTTATAGTAATACCAATTATAATTGGAGGATTTGGAAATTGACTAGTTCCATTAATATTAGGAGCTCCAGATATAGCTTTTCCACGAATGAATAATATAAGTTTTTGACTTCTTCCTCCCTCTTTAACACTTTTGTTAGCCAGTAGTATAGTTGAAAACGGAGCTGGAACAGGATGAACAGTTTATCCACCTTTATCATCAGTAATTGCACATGGTGGAGCTTCTGTTGATTTAGCAATTTTTTC…
RRMFI4062-15	BOLD:AAH2302	Diptera	Asilidae	Laphriinae	Laphria	AACTTTATATTTTATTTTTGGAGCTTGATCAGGAATAATTGGAACTTCATTAAGAATTTTAATTCGTACTGAATTAGGACACCCTGGGTCATTAATTGGAAATGACCAAATTTATAATGTTATTGTTACAGCTCATGCTTTTATTATAATTTTTTTTATAGTAATACCAATTATAATTGGAGGATTTGGTAATTGATTAGTTCCATTAATATTAGGAGCTCCAGATATAGCATTCCCACGAATAAATAATATAAGTTTTTGAATACTTCCTCCTGCTTTAACACTTTTATTAGTAAGTAGTATAGTAGAAAATGGAGCTGGTACAGGTTGAACAGTTTACCCTCCTTTATCTTCTGTAATTGCTCATGGTGGAGCTTCTGTAGATTTAGCAATTTTTTC…
RRMFG2298-15	BOLD:AAH2378	Coleoptera	Elateridae	Elaterinae	Melanotus castanipes	AACATTATATTTTATCTTTGGAGCTTGAGCAGGAATAGTAGGAACTTCATTAAGAGTGTTAATTCGAGCAGAATTAGGAAACCCTGGATCATTAATTGGGGATGACCAAATTTATAATGTTATTGTTACTGCACATGCTTTTGTAATAATTTTTTTTATAGTTATACCAATTATAATCGGAGGATTTGGAAATTGATTAGTTCCACTAATATTAGGAGCTCCTGATATAGCATTCCCTCGAATAAATAACATAAGTTTTTGATTACTCCCTCCTTCATTAACATTACTTTTAATGAGCAGTTTAGTAGAAAGAGGGGCTGGGACAGGATGAACAGTATACCCTCCCCTATCATCAGGAATTGCACATAGAGGAGCATCTGTAGATTTAGCAATTTTTAG…
RRSSC7195-15	BOLD:AAE0845	Hemiptera	Pentatomidae	Pentatominae	Euschistus	AACTTTATACTTCATTTTCGGGGCCTGATCAGGAATAATTGGAACTTCCCTAAGAATCTTAGTTCGAGCCGAATTAGGTCACCCGGGGGCATTAATCGGAGATGACCAAATTTATAACGTAATTGTGACAGCCCACGCCTTTATTATAATTTTTTTTATAGTAATACCAATTATAATTGGGGGATTTGGAAATTGACTAGTGCCTATTATACTAGGAGCACCTGATATGGCTTTCCCCCGAATAAATAATATAAGTTTCTGATTGCTTCCCCCAGCCTTAACACTACTCCTAATAAGTAGTATAGTAGAAAATGGAGCTGGGACAGGTTGAACAGTTTACCCACCCTTATCATCTAATATCGCCCATGGAGGGGCATCAGTAGACCTAGCGATTTTTTC…
RRGCO456-15	BOLD:AAA2590	Lepidoptera	Noctuidae	Noctuinae	Xestia smithii	AACTTTATATTTTATTTTTGGAATTTGAGCAGGAATAATCGGAACATCTTTAAGTTTATTAATTCGAGCTGAATTAGGTAGCCCCGGCTCTTTAATTGGAGATGATCAAATTTATAATACCATTGTTACAGCTCATGCTTTCATTATAATTTTTTTTATGGTTATGCCAATTATAATTGGAGGATTTGGAAATTGATTAGTACCTTTAATATTAGGAGCTCCTGATATAGCATTCCCTCGGATAAATAATATAAGATTTTGGTTACTCCCCCCCTCAATCACTTTATTAATTTCTAGAAGAATTGTAGAAAATGGAGCCGGTACAGGATGAACAGTTTACCCCCCCCTATCTTCTAATATTGCCCATGGAGGAAGATCTGTTGATTTAGCTATTTTTTC…
RRMFI4070-15	BOLD:AAI5446	Diptera	Muscidae	Mydaeinae	Graphomya americana	AACTATATATTTTATTTTTGGAATTTGATCAAGAATTTTAGGATCTACTTTAAGATTTATTATTCGAATTGAATTAAGAACTTCAGGTTCATTAATAACAAATGATCAGATTTATAATTCAATTGTTACATTACATGCTTTTATTATAATTTTTTTCATAATTATACCATTAATAATTGGAGGATTTGGAAATTGATTAGTTCCTTTAATATTATCAGCTCCTGATATAGCATTTCCTCGAATAAATAATATAAGATTTTGATTACTACCTCCTTCTATTTTTTTCCTAATTTCTGCAGTCTTTATAGATAATAGAGTAGGAACAGGTTGAACTGTTTACCCTCCTTTATCAAATAATTTATTTCATTCAGGAAAGTCAGTTGATATTTCAATTTTTTC…
RRMFG2355-15	BOLD:AAA4555	Orthoptera	Acrididae	Melanoplinae	Melanoplus	TATTTTATATTTTATTTTCGGAATATGAGCAGGAATAATTGGTTCATCAATAAGAATTATTATTCGTATAGAATTGGGTAATCCAGGATTTTTAATTAATAATGATCAAATTTACAATTCTATTGTTACTGCTCATGCATTTATTATAATTTTTTTTATAGTAATACCTATTATAATTGGTGGATTTGGAAATTGATTAATTCCATTAATATTAGGAGCTCCTGATATAGCCTTTCCACGAATAAATAATATGAGATTCTGATTATTACCTCCCTCAATTATATTAATTATTTCTAGAAGAATAATTAATCAAGGAGTTGGGACAGGCTGAACAGTTTATCCCCCTTTATCTTCTAATTTAAATCATGAAGGTATATCTGTAGATTTAGCTATTTTCTC…
RRMFC1998-15	BOLD:AAU7141	Coleoptera	Elateridae	Elaterinae	Ampedus linteus	CACTTTATATTTTATATTTGGAATTTGATCAGGATTAGTAGGATCTTCTCTTAGTTTTATTATTCGAATAGAATTAAGAACTCCAGGAAGATTTATTGGAAATGACCAAATTTATAATGTGATTGTAACTTCTCATGCTTTTATTATAATTTTCTTTATAGTTATACCAATTATAATTGGGGGGTTCGGAAATTGACTAGTACCCTTAATATTGGGATCACCTGATATAGCTTTTCCTCGAATAAATAATCTTAGATTTTGATTCCTTCCCCCATCTCTTATTTTTTTATTATTAAGAAGTATAACTAATTCTGGAGCTGGGACAGGATGAACTGTCTATCCTCCTCTATCTTCTAATTTATCTCATGCAGGCAGATCAGTTGATTTAACTATTTTTTC…
RRSSA2290-15	BOLD:AAH2376	Coleoptera	Elateridae	Elaterinae	Ampedus nigricollis	AACATTATATTTTATTTTTGGTATTTGAAGAGGAATACTAGGAACTTCTTTAAGATTATTAATTCGAGCAGAATTAGGTAATCCTGGTTATTTAATTGGTGACGATCAAATTTATAATACTATTGTAACAGCTCATGCTTTTATTATAATTTTTTTTATAGTTATACCTATTATAATTGGAGGATTTGGAAATTGATTAGTCCCTTTAATATTAGGTGCTCCAGATATAGCTTTTCCCCGTATAAATAATATAAGTTTTTGATTATTACCTCCTTCTATTATACTTTTAATTTCAAGAAGAATTGTAGAAAATGGAGCAGGAACTGGATGAACAGTATACCCCCCACTTTCATCAAATATTGCCCACAGAGGAAGTTCTGTAGACCTAGCAATTTTTTC…
RRMFI4225-15	BOLD:AAU7277	Coleoptera	Mordellidae	Mordellinae	Tomoxia lineella	AATTTTATATTTTATTTTTGGTATATGAGCCGGAATAAATGGATCATCAATAAGTATTATTATTCGAATAGAATTAGGTAATCCAGGTTATTTAATTAATAATGATCAAATTTATAATTCAATTGTAACAGCTCATGCTTTTATTATAATTTTCTTTATAGTAATACCTATTATAATTGGTGGATTTGGAAATTGATTAATTCCTTTAATATTAGGAGCTCCTGATATAGCTTTCCCTCGAATAAATAATATAAGATTTTGATTATTACCACCATCTATTTTTATATTAATTTTTAGAAGAATTACTAATCAAGGTATAGGAACTGGATGAACTGTTTATCCACCTTTATCTTCTAATTTAAATCATGAAGGTATATCAGTTGATTTAGGAATTTTTTC…
RRGCO355-15	BOLD:AAA2247	Lepidoptera	Notodontidae	Notodontinae	Gluphisia septentrionis	CACACTATACTTTATTTTCGGACTATGATCAGGACTAATTGGCTCCTCTCTCAGTTTAATTATTCGTACAGAATTAAGAACCCCAGGAAGATTAATTGGAAATGATCAAATCTATAATGTAATCGTTACAGCTCACGCTTTCATTATAATTTTTTTTATAGTTATACCTATTATAATCGGGGGATTCGGAAACTGATTAGTTCCTCTAATGCTAGGAGCCCCAGATATGGCCTTCCCACGAATAAATAATATAAGATTTTGATTCCTCCCTCCCTCTTTAATATTCCTAATCTTTAGCAGCTTAATTAACAACGGAGCAGGCACAGGATGAACAGTGTACCCTCCGTTATCATCAAACCTCTCTCATCTAGGAAGATCCGTCGATCTTACAATTTTCTC…
RRSSA4306-15	BOLD:AAG3685	Mecoptera	Panorpidae		Panorpa latipennis	AACATTATATTTTATTTTTGGAGCCTGAGCTGGAATAGTTGGAACTTCACTAAGTATACTAATTCGAGCTGAATTAGGACACCCTGGAGCATTAATTGGAGATGACCAAATTTATAATGTAATTGTAACAGCCCATGCTTTTATTATAATTTTTTTTATAGTTATACCAATTATAATTGGAGGATTTGGTAATTGATTGGTACCTTTAATATTAGGGGCCCCAGATATAGCCTTCCCACGTATAAATAATATAAGATTTTGAATATTACCTCCTTCTTTAACTTTACTTTTAGCTAGAAGTATAGTTGAAAATGGAGCCGGTACTGGATGAACTGTTTATCCTCCATTAGCTTCTGGAATTGCACATACTGGAGCTTCTGTTGATTTAGCAATTTTCTC…
RRMFI4078-15	BOLD:ABX5395	Diptera	Syrphidae	Eristalinae	Sericomyia chrysotoxoides	AACATTATATTTTATTTTTGGAGCATGAGCAGGGATAGTAGGAACTTCATTAAGTATATTAATTCGAGCTGAATTGGGGACTCCTGGTGCATTGATTGGTGATGATCAAATTTATAATGTTATTGTTACTGCACATGCTTTTATTATAATTTTTTTTATAGTTATACCTATTATAATTGGAGGATTTGGTAATTGATTAGTACCTTTAATATTAGGTGCTCCTGATATAGCTTTTCCTCGTATAAATAATATAAGTTTTTGATTATTACCTCCTTCTTTAACTCTTCTTTTAATAAGAAGAATAGTAGAAAGTGGTGCTGGAACTGGATGAACAGTTTATCCACCTTTATCATCTGGTATTGCTCATGGAGGAGCTTCAGTAGATTTAGCAATTTTTAG…
RRGCO229-15	BOLD:AAA2370	Lepidoptera	Noctuidae	Dilobinae	Raphia frater	AACAATATACTTCTTGTTTGGAATTTGATCAGGAATAGTAGGAATAATATTAAGTATAATTATTCGGATTGAGTTAGCTCAGCCAGGATCATTTTTAAATAATGATCAAATATATAATGTAATTGTTACATCTCACGCTTTTATTATAATTTTCTTTATAGTTATACCAATCATAATTGGTGGATTTGGTAACTGACTCTTACCTCTTATAATTGGAGCACCAGATATAGCATTTCCACGACTAAATAATATAAGATTTTGACTTTTACCACCTTCATTAACATTATTACTTTCAAGATCATTAATTGAAATAGGAGTAGGAACAGGATGAACAGTTTACCCTCCATTATCTAGATTTATTCACCATTCAGGACCAAGAGTTGATATATCTATTTTTTC…
RRMFI4216-15	BOLD:AAB6702	Coleoptera	Cerambycidae	Cerambycinae	Clytus ruricola	AACTTTATATTTTGTATTTGGTACATGAGCAGGAATAGTAGGTACATCCCTAAGTATATTAATTCGTATAGAACTTGGTCATCCAGGAGCATTAATTGGTGATGATCAAATTTATAATGTAATTGTTACTGCCCATGCATTTGTAATAATTTTTTTTATAGTTATACCAATTATAATTGGAGGATTTGGAAACTGACTAGTTCCCCTTATATTAGGAGCTCCAGATATAGCATTCCCTCGAATAAATAATATAAGTTTTTGATTATTACCTCCTTCATTAACTCTATTATTAATAAGAAGAATAGTAGAAAACGGAGCTGGAACAGGATGAACAGTCTACCCTCCTCTTTCAAGAAATATTGCTCATAGAGGGGCATCTGTAGATTTAGCAATTTTTTC…
RRSSA3968-15	BOLD:AAH6661	Coleoptera	Lampyridae	Lampyrinae	Pyractomena	AACTCTCTACTTCATTTTTGGCGCTTGAGCTGGAATAGTTGGCACATCCCTAAGAATTTTAATTCGTGCTGAACTAGGACACCCAGGAGCTTTAATTGGAGATGACCAAATTTATAATGTAATTGTTACTGCTCATGCTTTTGTAATAATTTTCTTTATAGTTATGCCCATTATAATTGGAGGATTTGGAAACTGGCTAGTACCCCTAATGCTAGGAGCCCCAGATATAGCCTTTCCTCGAATAAACAATATAAGCTTTTGACTTCTTCCACCCTCTTTAACCCTTCTCCTCGTTAGAAGAATAGTTGAAAATGGCGCCGGGACTGGATGAACCGTTTACCCCCCGTTATCTTCTGTAATTGCCCATGGAGGAGCTTCTGTTGATTTAGCAATTTTTAG…
RRMFC1666-15	BOLD:AAD5593	Hymenoptera	Vespidae	Vespinae	Vespula maculifrons	AACTTTATATTTTATTTTTGGAGCATGAGCAGGAATAGTAGGAACTTCATTAAGAATATTAATCCGTGCAGAATTAGGAAACCCTGGAGCATTAATTGGAGATGACCAAATTTATAATGTTATTGTTACTGCACATGCTTTTATTATAATTTTTTTTATAGTAATACCTATTATAATTGGAGGATTTGGAAATTGATTAGTTCCTTTAATATTAGGAGCACCAGATATAGCCTTTCCTCGAATAAATAATATAAGATTTTGACTTCTACCTCCATCATTAACCCTCCTTTTAATGAGAAGCCTTGTGGAAAGAGGTGCAGGTACAGGATGGACTGTCTACCCCCCACTCTCTTCAGGAATTGCACATGCTGGAGCATCAGTTGATTTAGCTATTTTTAG…
RRSSA234-15	BOLD:AAG6743	Diptera	Sarcophagidae	Sarcophaginae	Sarcophaga subvicina	AACATTATATTTTATTTTCGGAGCGTGATCCGGAATAATTGGAACTTCTTTAAGTATTTTAATTCGAGCTGAATTAGGACACCCTGGAGCATTAATTGGTGATGATCAAATTTATAATGTAATTGTAACTGCTCATGCCTTTATTATAATTTTTTTTATAGTAATGCCAATTATAATTGGAGGATTTGGTAATTGACTAGTGCCTCTTATACTAGGTGCTCCTGATATAGCTTTCCCTCGAATAAATAATATAAGTTTTTGACTTTTACCTCCTGCACTAACTTTATTGTTAGTAAGTAGTATAGTAGAAAACGGAGCTGGAACAGGATGAACTGTTTACCCTCCGTTATCTTCAAATATTGCTCATGGAGGAGCTTCTGTTGATTTAGCAATTTTTTC…
RRMFD032-15	BOLD:ACV5348	Diptera	Syrphidae	Syrphinae	Dasysyrphus venustus	AACCTTATATTTTATTTTTGGAGCATGATCAGGATCCCTTGGCTTAGCATTAAGTCTTCTAATTCGAGCAGAATTAGGAACTCCAGGTACTCTTATTGGAAATGACCAAATTTATAATGTTATTGTAACAGCACATGCTTTTATTATAATTTTCTTTATAGTTATACCTATCATAATTGGGGGATTTGGAAATTGATTAGTACCTTTAATATTAGGGGCCCCTGACATGGCATTTCCTCGTATAAATAACATGAGATTTTGATTTTTACCTCCTTCACTTATATTTTTATTAATAAGAAGAATAGTAGAAAGAGGAGCAGGAACAGGATGAACTGTTTATCCTCCTCTGTCAGCTAATATTGCTCATAGAGGACCATCAGTTGATTTAGCTATTTTTAG…
RRSSA235-15	BOLD:AAD2789	Diptera	Syrphidae	Eristalinae	Temnostoma balyras	AACTTTATATTTTATTTTTGGTGCTTGAGCAGGAATAGTAGGAACTTCATTAAGAATATTAATTCGAGCTGAATTAGGAAATCCTGGATCATTAATTGGTGATGATCAAATTTATAATGTTATTGTAACTGCTCATGCATTTGTTATAATTTTTTTTATAGTAATACCTATTATAATTGGAGGATTTGGAAATTGATTAGTCCCTTTAATATTAGGAGCTCCTGATATAGCTTTTCCTCGAATAAATAATATAAGTTTTTGACTTCTTCCTCCTTCATTAACTCTTCTTTTAATGAGAAGTATAGTTGAAAGTGGAGCTGGTACTGGATGAACAGTTTACCCCCCTTTATCTTCAGGAATTGCCCATGCTGGAGCTTCAGTTGATTTGGCTATTTTTAG…
RRMPA007-15	BOLD:AAF1237	Diptera	Syrphidae	Syrphinae	Platycheirus obscurus	AACTTTATATTTTATGTTCGGAATATGATCGGGAATAATTGGAATAATATTAAGAATAATTATCCGTGTTGAATTAGGGCAACCCGGACCATTTATTAACAATGATCAAATTTACAACACAATCATTACATCACATGCATTTATCATAATTTTCTTTATAGTAATACCTATCATAATTGGGGGATTTGGTAACTGACTATTACCTATTATAATCGGAGCACCAGATATAGCATTTCCTCGAATAAATAACATAAGATTTTGACTTTTACCACCATCAATTAAACTTCTATTGATTAGATCATTAGTAGAATCTGGTGTTGGAACAGGGTGAACAGTATATCCACCACTGTCTAGTAATATTGGACATTCTGGACCAAATGTTGAATTTGCAATTTTTTC…
RRMFE2534-15	BOLD:AAH7139	Diptera	Sarcophagidae	Sarcophaginae	Boettcheria bisetosa	AACTTTATATTTTATTTTTGGATTTTGATCTGGAATATTAGGTTTATCATTTAGATTATTAATTCGAACAGAACTTGGAATACCTGGATCTATAATTGGAGATGATCAAATTTACAATGTAATTGTAACATCCCATGCATTCTTAATAATTTTTTTTATAGTTATACCTATCATAATTGGAGGATTTGGGAATTGATTAATCCCTTTAATATTAGGAGCCCCTGATATAGCATTCCCACGTCTTAATAACATAAGATTTTGATTTTTACCTCCTTCATTAATTTTATTATTATCTAGAAGAATAGTAAATTCAGGATCAGGAACAGGATGAACAGTTTATCCTCCTTTATCTAGAAGAATATCCCATGCAGGAGCATCAGTTGATTTAACAATTTTTTC…
RRGCO547-15	BOLD:ACE5422	Lepidoptera	Crambidae	Crambinae	Neodactria luteolellus	AACTTTATATTTTATTTTTGGAATTTGAGCCGGTATAATTGGAACTTCTTTAAGATTACTAATTCGAGCTGAATTAGGAAACCCCGGATCTTTAATTGGAGACGACCAAATTTATAATACCATTGTAACAGCTCATGCTTTCATTATAATTTTTTTTATAGTTATACCAATCATAATTGGAGGATTTGGTAATTGATTAGTACCTCTGATACTAGGAGCTCCTGATATGGCTTTTCCACGAATAAACAATATAAGATTCTGATTACTCCCCCCATCTATTACTCTTCTAATTTCGAGAAGAATTGTAGAAAATGGAGCTGGAACTGGTTGAACAGTTTACCCCCCTTTATCTTCAAATATTGCTCATGGAGGAAGTTCTGTTGATTTAGCTATTTTTTC…
RRMFE3344-15	BOLD:AAJ2208	Diptera	Limoniidae	Limoniinae	Limonia immatura	AACATTATATTTTATTTTTGGTATTTGAAGAGGGATATTAGGAACTTCTTTAAGATTATTAATTCGAGCAGAATTAGGTAATCCTGGTTATTTAATTGGTGACGATCAAATTTATAACACTATTGTAACAGCTCATGCTTTTATTATAATTTTTTTTATAGTTATACCTATTATAATTGGAGGATTTGGAAATTGATTAGTTCCTTTAATATTAGGTGCTCCGGATATAGCTTTCCCCCGTATAAATAATATAAGTTTTTGATTATTACCTCCTTCTATTATACTTTTAATTTCAAGAAGAATTGTAGAAAATGGAGCAGGAACTGGATGAACAGTATACCCCCCACTTTCATCAAATATTGCTCATAGAGGTAGTTCTGTAGACCTAGCAATTTTTTC…
RRSSA2292-15	BOLD:ACR3975	Coleoptera	Elateridae	Elaterinae	Ampedus protervus	AACTTTATATTTCATTTTTGGTACATGGTCAGGAATAGTAGGAACTTCCCTCAGTCTACTAATTCGAGCCGAACTAGGAAACCCTGGATCTTTAATTGGTAACGATCAAATCTACAACGTTATCGTAACAGCCCATGCATTTGTAATAATTTTTTTCATGGTTATACCAATTGTAATTGGTGGATTTGGAAATTGATTAGTTCCCTTAATACTCGGGGCTCCTGATATAGCTTTTCCTCGAATAAACAATATAAGATTTTGACTTCTCCCTCCGTCATTAAATTTATTGCTTACTAGAAGAATAGCTGAAAGAGGAGCAGGAACTGGTTGAACAGTTTATCCACCTCTATCAGCAAATGTTGCTCATAGAGGAACTTCTGTTGATTTAGCAATTTTCAG…
RRSSA2333-15	BOLD:AAC0661	Coleoptera	Carabidae	Harpalinae	Pterostichus melanarius	AACTCTTTATTTTATTTTTGGAGCTTGATCAGGTATAATTGGCACATCTTTAAGATTATTAATTCGTTCAGAATTAGGTAATCCAGGATCTCTAATTGGAGATGATCAAATTTATAATGTAATTGTTACAGCACATGCTTTTATTATAATTTTTTTTATAGTAATACCTATTATAATAGGAGGATTTGGAAATTGATTAGTGCCCCTAATATTGGGAGCTCCTGATATAGCTTTCCCCCGAATAAATAACATAAGATTTTGACTTTTACCACCTTCTCTTACTTTACTTTTAATAAGAAGAATTGTGGAAAACGGGGCAGGAACTGGATGAACAGTTTACCCACCATTATCTTCAAATATTGCCCATAATGGTTCATCAGTTGATTTAACAATTTTTAG…
RRMFG3290-15	BOLD:AAA2218	Odonata	Coenagrionidae	Ischnurinae	Enallagma	AACCCTCTACTTTATCTTTGGTGCGTGAGCAGGAATACTAGGTACATCCCTAAGCCTACTCATCCGTGCCGAACTAGGAAACCCTGGGTCTCTAATTGGTAACGACCAAATCTACAACGTTATTGTTACCGCACACGCATTCATCATAATTTTCTTTATAGTTATACCAATCATGATTGGAGGATTCGGAAATTGGTTAGTTCCATTGATACTAGGAGCCCCAGATATAGCTTTCCCTCGAATAAATAACATAAGATTCTGGCTATTACCACCTTCATTAAGACTTTTACTAATAAGAAGAATTGTAGAAAACGGAGCAGGAACAGGATGAACTGTGTACCCACCACTATCATCTAATATTGCCCACAGAGGTTCCTCTGTAGACCTTGCAATTTTTAG…
RRSSC1963-15	BOLD:AAG5647	Diptera	Rhagionidae		Symphoromyia fulvipes	AACATTATACTTCATTTTCGGAGCATGGGCTGGATTAGTAGGTACAGCCTTAAGAATAATTATCCGAATAGAATTAAGAACACCAGGACACCTAATTAATGATGATCAAATTTATAATGTAGTAGTAACGGCTCACGCATTTATTATAATCTTTTTTATAGTAATACCAATTATAATTGGAGGATTTGGTAATTGATTAGTCCCCTTAATAATTGGAGCCCCAGACATAGCATTTCCGCGAATAAATAATATAAGATTTTGACTATTACCACCATCATTAATATTATTAATTTCTAGTAGAATTGTAGATACAGGTGTAGGAACTGGATGAACTGTTTATCCACCCTTAGCAGGACCTATTGCACACAGCGGGGTAGCAGTAGATTTAGCTATTTTTTC…
RRSSC4804-15	BOLD:AAA3447	Lepidoptera	Pieridae	Coliadinae	Colias	AACCCTTTACTTCGTCTTTGGGGCATGAGCAGGAATAGTAGGAACATCCCTAAGAGTTTTAATCCGATCAGAACTGGGAAATCCAGGATCCTTAATTGGAGATGATCAAATTTACAATGTAATCGTAACAGCCCATGCATTTATCATAATTTTCTTTATAGTTATACCAATCATAATTGGAGGATTCGGAAATTGATTAGTGCCTCTAATACTTGGTGCTCCTGATATGGCCTTCCCCCGAATAAATAATATGAGATTCTGATTACTTCCCCCATCATTAGCATTACTTATTATAAGAAGAATTGTAGAAAGAGGAGCAGGAACAGGATGGACTGTTTATCCTCCCCTATCTGCTAATGTAGCTCACAGGGGATCTTCTGTAGACTTAGCTATTTTTAG…
RRGCO465-15	BOLD:AAA3073	Lepidoptera	Noctuidae	Noctuinae	Ochropleura implecta	AACTTTATATTTTATTTTTGGTGTGTGAGCAGGAATAATTGGAACTTCTTTAAGTTTATTAATTCGTACAGAATTAGGTAATCCTGGATCGCTAATTGGAGATGATCAAATTTATAACACTATTGTTACAGCTCATGCCTTTATTATAATTTTTTTTATAGTTATGCCAATTATAATTGGAGGATTTGGTAATTGATTAATTCCTTTGATATTAGGAGCCCCTGATATAGCTTTCCCACGTATAAATAATATAAGATTTTGATTACTACCCCCATCATTAACTTTATTAATTTCTAGAAGTATTGTTGAAAACGGAGCAGGAACAGGATGAACAGTTTACCCCCCTCTTTCTTCTAATATTGCCCATAGAGGATCTTCTGTTGATTTAGCTATTTTTTC…
RRSSC4965-15	BOLD:AAB7413	Hymenoptera	Andrenidae	Andreninae	Andrena nasonii	TACTTTATACTTTATTTTTGGAGCTTGATCAGGAATAATTGGAACTTCACTAAGAATTCTAATTCGAGCTGAATTAGGACACCCTGGAGCATTAATTGGAGATGACCAAATTTATAACGTAATTGTTACAGCTCATGCTTTTATTATAATTTTTTTTATAGTAATACCAATTATAATTGGAGGATTTGGTAATTGATTAGTTCCTCTAATACTAGGAGCCCCAGATATAGCTTTCCCTCGAATAAATAATATAAGTTTCTGACTTTTACCTCCTGCATTAACTTTATTGTTAGTAAGTAGTATAGTAGAAAACGGAGCTGGAACAGGATGAACTGTTTATCCTCCTTTATCTTCTAATATCGCACATGGAGGAGCTTCAGTAGATTTAGCTATTTTTTC…
RRSSC7805-15	BOLD:AAG4429	Coleoptera	Chrysomelidae	Chrysomelinae	Calligrapha	GATATTATATTTTATTTTTGGTATATGATCCGGAATAATTGGATCTTCCATAAGAATAATTATTCGTATAGAATTAGGGAATCCAGGTTACTTAATTAATAATGATCAAATTTATAATTCCATTGTTACAGCTCACGCTTTTATTATAATTTTTTTTATAGTTATACCAATTATAATTGGAGGATTTGGAAATTGATTAGTGCCTTTAATATTAGGGGCCCCAGATATAGCATTCCCACGAATAAATAATATAAGATTTTGACTTTTACCCCCATCATTATTAATATTAATTTTTAGAAGAATTACTAACCAAGGAGTAGGAACTGGATGAACAGTATATCCCCCTTTATCCCTAAACCTTAATCATGAAGGTCTTTCAGTTGATTTAGCTATTTTTTC…
RRMFI4192-15	BOLD:AAB7690	Hymenoptera	Megachilidae	Megachilinae	Megachile inermis	AACATTATATTTTTTATTTGGTACATGAGCCGGAATAGTAGGAACATCATTAAGAATTTTAATTCGTGCAGAATTGGGACATCCTGGAGCCTTAATTGGAGACGATCAAATTTATAATGTTATTGTAACTGCTCATGCTTTCGTAATAATTTTTTTTATAGTAATACCAATTATAATTGGAGGATTTGGAAATTGATTAGTTCCATTAATATTAGGAGCACCTGATATAGCATTTCCTCGAATAAATAATATAAGATTTTGACTACTTCCTCCTTCTTTAACTTTATTATTAGTAAGAAGTATAGTAGAAAATGGAGCTGGAACTGGATGAACAGTTTATCCACCATTATCAGCAACTATTGCTCATGGAGGAGCCTCAGTTGATTTAGCAATTTTTTC…
RRGCO513-15	BOLD:AAB3885	Lepidoptera	Erebidae	Herminiinae	Macrochilo absorptalis	AACATTATATTTTATTTTCGGAGCATGAGCAGGAATAGTAGGAACTTCATTAAGTATCCTTATTCGAGCTGAATTAGGTCATCCAGGAGCATTAATTGGAGATGATCAAATTTATAACGTAATTGTTACAGCCCATGCTTTTATTATAATTTTTTTTATAGTAATACCTATTATAATTGGAGGATTTGGTAATTGATTAGTTCCATTAATATTAGGAGCTCCTGATATAGCTTTCCCCCGAATAAACAATATAAGTTTTTGACTTTTACCTCCTGCATTAACTTTATTGTTAGTAAGTAGTATAGTAGAAAATGGAGCTGGAACAGGATGAACTGTTTACCCTCCCTTGTCTTCTAATATTGCTCATGGAGGAGCTTCTGTTGATTTAGCAATTTTTTC…
RRMFD018-15	BOLD:AAG6762	Diptera	Syrphidae	Eristalinae	Chalcosyrphus nemorum	AACTTTATATTTTATTTTCGGAGCTTGAGCTGGTATAGTAGGTACCTCTCTTAGTATTTTAATTCGAGCCGAGTTAGGTCATCCTGGAGCTCTAATTGGAGATGATCAAATTTATAATGTAATTGTAACAGCACATGCTTTTGTAATAATTTTTTTTATAGTTATACCTATTATAATTGGAGGATTTGGTAATTGATTAGTTCCACTAATACTAGGTGCCCCAGATATAGCTTTTCCTCGAATAAACAATATAAGATTTTGATTATTACCTCCTTCATTAACCTTATTATTAGTTAGAAGCATAGTAGAAAACGGGGCTGGAACAGGTTGAACAGTATACCCTCCTTTATCTTCAGTTATTGCACATGGTGGTGCCTCTGTAGATTTAGCTATTTTCTC…
RRMFG2300-15	BOLD:AAH0466	Coleoptera	Elateridae	Dendrometrinae	Denticollis denticornis	AACATTATATTTTATTTTTGGTATTTGAGCAGGAATAGTAGGAACTTCTTTGAGTTTATTAATTCGAGCAGAATTAGGTAATCCAGGTTCTTTAATTGGAGATGATCAAATTTATAATACTATTGTAACAGCTCATGCTTTTATTATAATTTTCTTCATAGTTATACCAATTATAATTGGAGGATTTGGAAATTGATTAGTGCCTTTAATATTAGGTGCTCCAGATATAGCTTTCCCTCGTATAAATAATATAAGTTTTTGATTACTTCCACCTTCTATTATACTTTTAATTTCAAGAAGAATTGTAGAAAATGGAGCAGGAACTGGATGAACAGTATACCCCCCACTTTCATCTAATATTGCTCATGGAGGAAGTTCTGTAGACTTAGCAATTTTTTC…
RRMFB1218-15	BOLD:ABZ2493	Diptera	Tachinidae	Tachininae	Epalpus signifer	ATTATTATACTTTGTTTTTGGTTTATGATCAGGAATAATTGGATCTTCATTAAGAATAATTATCCGTATAGAACTTGGAACCCCTGGACAATTAATTGGTAATGATCAAATTTACAATACTATTGTTACTGCACATGCTTTTATTATAATTTTTTTTATAGTTATACCTTTTATAATTGGAGGATTTGGAAACTGATTAATTCCAATTATATTATCAGCACCAGATATAGCCTTCCCACGTATAAATAATATAAGATTTTGACTATTACCTCCTTCATTAATATTATTACTTATAAGCAATTCTATTGGTTCAGGTGTAGGAACTGGATGAACTTTATACCCTCCTTTATCTTCTATTATTGGCCATAATACTCCCTCTGTAGATTTAAGTATTTTTTC…
RRGCO578-15	BOLD:AAB0268	Lepidoptera	Tortricidae	Tortricinae	Archips purpurana	AACATTATATTTTATTTTTGGAATTTGAGCAGGTATAGTAGGAACATCCCTTAGTCTAATTATTCGAACTGAACTAGGTAATCCAGGATTTTTAATTGGAGATGACCAAATTTATAATACTATTGTTACAGCTCATGCTTTTATTATAATTTTTTTTATAGTAATACCTATTATAATCGGAGGATTTGGTAATTGATTAGTCCCTCTTATACTAGGTGCTCCTGATATAGCTTTCCCCCGAATAAATAATATAAGATTTTGACTTTTACCCCCCTCATTAATTTTGTTAATTTCAAGTAGTATTGTTGAAAATGGAGCAGGAACAGGTTGAACTGTTTACCCCCCTCTTTCTTCCAACATTGCTCATGGAGGATCCTCTGTTGACCTTGCTATTTTCTC…
RRMFG2655-15	BOLD:AAO0522	Coleoptera	Chrysomelidae	Cassidinae	Cassida rubiginosa	TATATTATATATTATTTTTGCTTTATGGTCAGGTATAATTGGAACATCAATGAGATTTTTAATTCGTATAGAATTAAGTAATCCAGGAGAATGAATTATAAATGATCAAATTTATAATTCTTTAGTTACTGCACATGCTTTTTTAATAATTTTTTTTATAGTTATACCTTTTATAATTGGAGGATTTGGAAATTGATTAGTTCCTTTAATATTAGGTTGTCCTGATATAGCTTTTCCTCGTATAAATAATATTAGATTTTGATTATTACCTCCATCTTTGTTTTTATTATTATTAAGAAATTTATTTAATATTACTCCAGGTACAGGATGAACAGTTTATCCTCCTTTATCTTCATCTATATTTCATAGATCTCCTTCTGTAGATTTAGCAATTTTTTC…
RRSSA3967-15	BOLD:ACC7779	Coleoptera	Elateridae	Cardiophorinae	Cardiophorus convexus	AACTTTATACTTTATTTTCGGTGCTTGAGCTAGAATAGTCGGAACATCCCTAAGTTTATTAATTCGTTCAGAATTAGGAAACCCCGGATCTTTAATCGGAAATGATCAAATTTATAATGTAATTGTTACAGCTCATGCTTTTGTAATAATTTTCTTCATAGTTATACCTATTATAATTGGCGGATTCGGAAATTGATTAGTTCCATTAATATTAGGGGCTCCCGATATAGCATTCCCTCGAATAAATAATATAAGATTTTGATTATTACCTCCTTCTCTAACTTTATTAATTATAAGAAGAGTTGTCGAAAAAGGTGCCGGAACTGGATGAACAGTCTACCCTCCGCTTTCAGCTAATATTGCTCATAGAGGATCTTCTGTAGATTTAGCTATTTTTAG…
RRGCO519-15	BOLD:AAA4464	Lepidoptera	Noctuidae	Noctuinae	Cryptocala acadiensis	AACATTATATTTTTTATTTGGAATTTGATCAGGAATATTAGGAACTTCACTAAGTTTATTAATTCGTGCAGAATTAGGAAACCCAGGATCTTTAATTGGAGATGATCAAATTTATAATACAATTGTGACCGCTCATGCATTTATTATAATTTTCTTTATAGTTATACCTATTGTTATTGGAGGATTCGGAAATTGACTTATCCCATTGATATTAGGAGCTCCTGATATAGCCTTTCCTCGAATAAATAATATAAGATTTTGACTACTTCCCCCCTCATTAACCTTATTAATTTCCAGAAGAATTGTTGAAAATGGAGCAGGTACTGGATGAACTGTTTATCCTCCTTTATCTTCAAATATCGCTCATAGAGGAAGATCTGTCGATTTAGCTATTTTTTC…
RRGCO250-15	BOLD:AAA6177	Lepidoptera	Erebidae	Arctiinae	Phragmatobia	AACATTATATTTTATTTTTGGTATTTGAGCTGGTATAATTGGTACTTCTCTAAGATTATTAATTCGTGCTGAATTAGGAAATCCTGGATCTTTAATTGGGGATGACCAAATTTATAATACTATTGTAACTGCTCACGCATTTATTATAATTTTTTTCATGGTTATACCTATTATAATTGGAGGATTTGGAAATTGATTAGTTCCCTTAATATTAGGAGCTCCTGATATAGCATTCCCCCGAATAAATAATATAAGATTTTGATTATTACCCCCCTCTATTATACTTTTAATCTCAAGTAGAGTAGTAGAAAATGGAGCAGGTACCGGATGAACAGTTTATCCCCCACTTTCATCAAACATTGCTCATAGCGGAAGATCTGTAGATCTAGCTATTTTTTC…
RRMFC2020-15	BOLD:AAD7145	Diptera	Muscidae	Mydaeinae	Myospila meditabunda	AACTTTATATTTTATTTTCGGAGCATGATCTGGAATAATTGGTACTTCATTAAGTATTTTAATTCGAGCTGAATTAGGACATCCTGGTTCATTAATTGGTGATGATCAAATTTATAATGTAATTGTTACTGCTCATGCATTTATTATAATTTTTTTTATAGTAATACCAATTATAATTGGAGGATTTGGAAATTGATTAGTTCCTTTAATATTAGGAGCCCCAGATATAGCTTTTCCACGAATAAATAATATAAGTTTTTGATTACTTCCCCCTTCATTAACACTTTTATTAGCAAGTAGTATAGTAGAAAACGGAACTGGTACAGGATGAACAGTTTACCCCCCTTTATCCTCAGTAATTGCTCATGGAGGAGCTTCTGTTGATTTAGCAATTTTTTC…
RRSSC3214-15	BOLD:AAG2724	Hemiptera	Reduviidae	Harpactorinae	Zelus luridus	AACCTTATATTTTATTTTTGGAAGTTGATCAGGATTATTAGGAACATCTTTAAGAGTTCTAATTCGAACAGAATTAGGAACTACTAAATCTTTAATTAATAATGATCAAATTTATAATGTTTTAGTCACTGCTCATGCTTTTATTATAATTTTTTTTATAGTAATACCAATTATAATTGGAGGTTTTGGCAATTGACTTGTTCCTTTAATGTTAGGAGCTCCAGATATGGCATTCCCACGAATAAATAATATAAGATTTTGACTTTTGCCTCCTTCTTTAAATTTTTTATTACTTAGAAGTTTAGTAGAAAATGGAACTGGAACTGGTTGAACTGTCTATCCTCCTTTAGCAAGAAACATCGGTCATATGGGGAGTTCTGTTGATTTATCTATTTTTTC…
RRGCO427-15	BOLD:AAA0399	Lepidoptera	Crambidae	Acentropinae	Elophila obliteralis	AACATTATACTTTTTATTTGGAATGTGAGCTGGAATAGTGGGATCTGCAATAAGATTAATTATCCGTATTGAATTGGGTCAGCCCGGAAGATTTATTGGAGATGACCAAATTTATAACGTTGTAGTTACAGCACATGCCTTTGTAATAATTTTCTTTATAGTTATACCTATTATAATTGGAGGATTCGGAAATTGATTAGTACCTTTAATAATTGGAGCCCCTGATATGGCATTCCCTCGAATAAATAATATAAGATTTTGATTATTACCTCCTTCCTTAACATTATTAATAGTAAGTAGATTAGCAGAGGCTGGAGCTGGGACTGGATGAACTGTTTATCCTCCCTTATCTAGTAACCTTTCCCATAGAGGAGCTTCTGTAGATCTAGCAATCTTTTC…
RRGCO276-15	BOLD:AAA5051	Lepidoptera	Crambidae	Spilomelinae	Desmia funeralis	AACATTATATTTTATTTTTGGAATTTGAGCAGGAATAGTCGGAACATCTTTAAGATTATTAATTCGAGCTGAATTAGGAAATCCCGGATCTTTAATTGGGGATGATCAAATTTATAATACTATTGTTACAGCACATGCTTTTATTATAATTTTTTTTATAGTTATACCAATTATAATTGGAGGTTTTGGAAATTGATTAGTACCATTAATATTAGGAGCTCCAGATATAGCCTTCCCTCGAATAAATAACATAAGTTTTTGATTATTACCTCCTTCATTAACCCTTTTAATTTCAAGAAGAATTGTAGAAAATGGAGCAGGAACAGGATGAACAGTTTACCCCCCACTTTCATCTAATATCGCTCATGGTGGTAGATCAGTAGATCTAGCTATTTTTTC…
RRGCO055-15	BOLD:AAA5643	Lepidoptera	Erebidae	Herminiinae	Phalaenophana pyramusalis	AACATTATATTTTATTTTTGGGATCTGAGCAGGAATAGTTGGAACATCCTTAAGATTATTAATTCGTGCTGAATTAGGAAATCCTGGTTCTTTAATTGGAGATGATCAAATCTATAATACTATCGTAACAGCTCATGCTTTTATTATAATTTTTTTTATAGTTATACCAATTATAATTGGAGGATTCGGTAATTGATTAGTGCCTTTAATATTAGGAGCTCCTGATATAGCTTTTCCACGAATAAATAATATAAGTTTTTGACTTTTACCTCCATCATTAACTTTATTAATTTCAAGAAGAATTGTAGAAAATGGAGCAGGAACAGGATGAACAGTTTACCCCCCACTTTCATCTAATATTGCTCATGGTGGAAGATCAGTAGATTTAGCTATTTTTTC…
RRSSA228-15	BOLD:AAE9257	Diptera	Tabanidae	Chrysopsinae	Chrysops cincticornis	AACATTATATTTTATTTTTGGAATTTGAGCAGGAATAGTTGGAACTTCTTTAAGATTATTAATTCGTGCTGAATTAGGAAATCCAGGATCTTTAATTGGAGATGACCAAATTTATAATACTATTGTAACAGCACATGCTTTTATTATAATTTTTTTTATAGTAATACCTATTATAATTGGAGGATTTGGTAATTGATTAGTTCCCCTTATACTAGGAGCCCCAGATATAGCCTTTCCTCGAATAAATAATATAAGTTTTTGACTTCTCCCCCCCTCATTAACTTTATTAATTTCAAGAAGAATTGTAGAAAATGGAGCAGGAACAGGATGAACAGTTTACCCCCCACTTTCATCTAATATTGCCCATAGAGGAAGATCAGTAGATTTAGCTATTTTTTC…
RRMFE2527-15	BOLD:ABV1657	Diptera	Tachinidae	Exoristinae	Parasetigena silvestris	AACACTATATTTTATTTTTGGTGCTTGATCTGGATTACTAGGAACATCTCTAAGAGTAATAATTCGAACTGAATTAGGTTCAGTAGGGTCATTAATTAAAAATGATCAAATTTATAATGTAATGGTTACTGCTCATGCTTTTATTATAATTTTTTTTATAGTGATACCTATAATAATTGGAGGATTTGGAAATTGACTAGTTCCTTTAATACTAAGATGTCCTGATATAGCTTTTCCTCGAATAAATAATATAAGATTTTGATTACTTCCACCATCTTTAAATTTTCTTTTATTAAGAAGATTAGTAGAAAGAGGAACAGGAACTGGTTGAACTGTTTATCCTCCACTTGCAAGAACAGTAGGACACATAGGAAGTTCTGTGGATTTATCAATTTTTTC…
RRSSC7193-15	BOLD:ABX6186	Diptera	Tipulidae	Tipulinae	Nephrotoma ferruginea	GACTTTGTACTTTATTTTTGGTGCATGAGCAGGAATAGTAGGAACTTCTTTAAGTATATTGATTCGAGCAGAATTAGGAAACCCGGGATCATTAATTGGTGATGATCAAATTTATAATGTAATTGTTACTGCCCATGCATTTATTATAATTTTCTTTATAGTAATACCTATTATAATTGGAGGATTTGGAAATTGATTAGTTCCTTTAATATTGGGAGCTCCTGATATAGCATTTCCTCGAATAAATAATATAAGTTTCTGATTACTTCCTCCTTCTTTAACTTTGCTCTTAATGAGAAGAATAGTTGAAAGAGGAGCAGGGACCGGATGAACAGTTTACCCTCCTTTATCTTCTGGAATTGCTCACGCAGGAGCTTCGGTTGATTTAGCTATTTTTAG…
RRGCO238-15	BOLD:AAA2586	Lepidoptera	Geometridae	Larentiinae	Ecliptopera silaceata	AACTTTATATTTTATTTTTGGAGCCTGAGCAGGAATAGTGGGAACATCATTAAGAATACTAATTCGAGCTGAACTAGGTCATCCAGGTGCTTTAATTGGTGACGACCAAATCTATAACGTAATTGTTACAGCCCATGCTTTCGTAATAATTTTCTTTATAGTAATACCTATTATAATTGGAGGATTCGGAAATTGACTTGTTCCTTTAATACTAGGAGCCCCTGATATAGCTTTTCCTCGTATAAATAATATAAGATTTTGACTTCTCCCACCATCTTTAACTCTTCTTCTAATAAGCAGAATAGTAGAAAATGGGGCTGGGACAGGTTGAACAGTTTACCCCCCTCTCTCTTCTAATATCGCTCATGGTGGTGCATCAGTTGATTTAGCTATTTTCTC…
RRMFE3088-15	BOLD:AAV0836	Diptera	Syrphidae	Eristalinae	Myolepta nigra	AACATTATATTTTATTTTTGGAATTTGAGCAGGAATAGTTGGTACTTCTTTAAGATTATTAATTCGTGCTGAATTAGGAAATCCTGGATCTTTAATTGGAGATGACCAAATTTATAATACTATCGTTACCGCTCATGCTTTTATTATAATTTTTTTTATAGTAATACCTATTATAATTGGAGGATTTGGAAATTGATTAGTTCCATTAATACTAGGAGCTCCTGATATAGCTTTTCCACGAATAAATAATATAAGATTTTGAATACTCCCCCCATCTCTTATACTACTTATTTCAAGAAGAATTGTAGAAACTGGAGCAGGTACTGGATGAACTGTATATCCCCCCCTTTCATCTAATATTGCTCATAGTGGAACCTCAGTTGATTTAGCTATTTTCTC…
RRMFG2356-15	BOLD:AAG3173	Orthoptera	Acrididae	Melanoplinae	Melanoplus	AACCTTATATTTTTTATTTGGAATATGGGCTGGAATAATCGGAACTTCTCTTAGAATTTTAATTCGACTAGAATTAGGAACTACAGGAAGTTTAATTGGAAATGACCAAATTTATAACGTAATTGTTACTGCCCATGCTTTTATTATAATTTTTTTTATAGTTATACCTATTATAATTGGAGGTTTTGGAAATTGATTGGTACCTTTAATAATTGGGGCCCCTGATATAGCGTTCCCCCGTTTAAATAATATAAGATTTTGGCTTTTACCCCCTGCTTTAACTCTTCTTTTATTTAGAAGAATAGTAGAAATAGGAGCTGGAACTGGGTGAACTGTTTATCCTCCTTTATCTTCAAATTTAGCCCATAATGGACCTTCTGTTGATTTAGTTATTTTTAG…
RRGCO536-15	BOLD:AAE7397	Lepidoptera	Depressariidae	Depressariinae	Depressaria depressana	TACATTATACTTTTTATTTGGTATATGATCTGGAATAATTGGTTCCTCCATAAGATGAATTATCCGAGTAGAATTAGGACAACCAGGATCCTTTATTGGAGATGACCAAATCTATAATGTTATCGTAACTGCCCATGCATTCATCATAATTTTTTTCATGGTTATACCAATTATAATTGGAGGTTTTGGCAATTGATTAGTACCTTTAATAATTGGGGCACCAGATATAGCCTTCCCTCGAATAAATAATATATCATTTTGACTTTTACCACCTTCACTAACATTACTTTTATCAAGAAGAATAGTAGAAATAGGAGCAGGAACTGGATGAACAGTTTATCCTCCTTTATCAAACAGATTATTCCACAGAGGAGCATCAGTAGATATAGCAATCTTCTC…
RRGCO222-15	BOLD:AAA8684	Lepidoptera	Erebidae	Arctiinae	Haploa	AACTTTATATTTTATTTTTGGTATTTGATCTGGAATAGTAGGTACTTCATTAAGTTTATTAATTCGTGCTGAATTAGGAAATCCCGGATCTTTAATTGGAGATGATCAAATTTATAATACTATCGTAACAGCTCATGCCTTTATTATAATTTTTTTTATGGTTATACCTATTATAATTGGCGGATTTGGAAATTGATTAGTGCCTTTAATATTAGGTGCTCCTGATATAGCTTTCCCTCGAATAAATAATATAAGATTCTGATTACTACCTCCTTCATTAACTTTACTAATTTCCAGAAGAATTGTAGAAAATGGAGCAGGAACTGGATGAACAGTGTACCCCCCACTTTCATCTAATATTGCTCATGGAGGAAGATCTGTTGATTTAGCTATTTTTTC…
RRGCO537-15	BOLD:AAA4458	Lepidoptera	Erebidae	Herminiinae	Lascoria ambigualis	AACTTTATATTTAATATTTGGAGCATGGGCCGGAATAGTAGGAACTGCTCTAAGAATATTAATTCGAGTTGAATTAGGACAACCTGGATCATTAATTGGAGATGATCAAATTTATAATGTAGTAGTTACTGCACATGCATTTGTTATAATTTTTTTTATAGTTATACCTATTATAATCGGAGGATTTGGAAATTGACTGGTACCATTAATATTAGGAGCGCCAGATATGGCTTTTCCACGATTAAATAACATGAGATTTTGACTTTTACCCCCATCACTAACCTTATTACTAGCAAGAAGATTAGTAGAAAGAGGAGCCGGGACTGGTTGAACTGTATATCCTCCATTAGCAGGGGTAATTGCTCATGCTGGAGCATCCGTTGATTTAACTATTTTTTC…
RRSSA226-15	BOLD:AAF0889	Diptera	Tabanidae	Tabaninae	Hybomitra lasiophthalma	AACTTTATATTTTGTATTTGGGGCTTGATCAGGAATAGTGGGGACTTCATTGAGCTTGTTGATTCGGGCAGAATTGGGCCAACCTGGAGCTTTAATCGGAGATGATCAAATTTATAATGTAATTGTTACGGCCCATGCTTTTGTAATGATTTTTTTTATGGTAATGCCTATTATGATTGGAGGTTTTGGGAATTGACTGGTACCTTTGATGTTGAGAGCCCCAGATATGGCCTTTCCCCGAATAAACAACATGAGTTTTTGGTTACTACCCCCTTCGCTTATGCTTTTGCTTTCTGGGAGTATGGTAGATAGAGGAGCTGGTACAGGTTGGACAGTTTACCCCCCTTTGTCGGGGGCCATCGCCCACGCAGGGGCTTCGGTAGATTTGAGTATTTTTTC…
RRGCO376-15	BOLD:AAB4478	Lepidoptera	Pyralidae	Phycitinae	Dioryctria	AACTTTATATTTTATTTTTGGTGTTTGGTCAGGACTATTAGGAACATCTCTAAGAGTACTAATTCGAACAGAACTGGGAACTCTTGGATCTTTAATTAAAAATGATCAAATTTATAATGTTTTAGTTACTGCACATGCTTTTATTATGATTTTTTTTATAGTGATGCCAATTATAATTGGCGGGTTTGGAAACTGATTAGTTCCTTTAATATTGGGAGCTCCAGATATAGCCTTTCCTCGAATAAATAACATAAGATTTTGGTTACTCCCTCCTTCATTAAATTTTTTACTTTTAAGAAGAATAGTGGAAAGAGGGACTGGAACAGGTTGAACTGTTTACCCCCCTTTAGCTAGAAATATCGCTCATATGGGCAGATCAGTTGATTTATCAATTTTTTC…
RRGCO570-15	BOLD:AAA8678	Lepidoptera	Crambidae	Crambinae	Urola nivalis	AACATTATATTTCTTATTCGGAATATGAGCCGGAATAATTGGGACCTCTTTAAGAATTTTAATTCGTCTTGAATTAGGAACTACTAATAGATTAATTGGAAATGACCAAATTTATAATGTAATTGTAACAGCTCATGCCTTCATTATAATTTTTTTTATAGTTATACCAATTATAATTGGAGGATTTGGAAATTGACTTGTTCCTTTAATAATTGGAGCACCTGACATAGCTTTCCCTCGATTAAATAATATAAGATTTTGACTACTCCCACCTGCCTTAACCTTACTTATTATTAGAAGATTAGTGGAAATAGGTGCAGGAACTGGATGAACTGTCTATCCTCCTTTATCCTCTAACTTAGCTCATAATGGGCCTTCAGTAGATTTAGTAATTTTTAG…
RRMFG3282-15	BOLD:AAP8630	Diptera	Tipulidae	Tipulinae	Ctenophora dorsalis	AACATTATATTTTATTTTTGGAGCATGAGCAGGAATAGTAGGAACTTCATTAAGCATATTAATTCGAGCTGAATTGGGAACTCCTGGTGCATTAATTGGTGATGATCAAATTTATAATGTTATCGTTACTGCACATGCTTTTATCATAATTTTTTTTATAGTTATACCTATTATAATTGGAGGATTTGGAAATTGATTAGTACCTTTAATACTAGGTGCTCCTGATATAGCCTTTCCTCGAATAAATAATATAAGTTTTTGACTACTTCCCCCTTCTTTAACTCTTCTTTTAATAAGAAGAATAGTAGAAAGTGGAGCTGGAACTGGATGAACAGTTTATCCACCTTTATCATCTGGAATTGCCCATAGAGGAGCTTCAGTTGATTTAGCAATTTTTAG…
RRSSA2338-15	BOLD:AAY4533	Coleoptera	Carabidae	Harpalinae	Platynus hypolithos	AACCTTATATTTTATTTTTGGAATTTGATCAGGAATATTAGGAACATCATTAAGATTATTAATTCGAATGGAATTAAGAACCCCTGGAGCATTAATTGGAAATGATCAAATTTATAATACAATTGTAACAGCACATGCTTTTATTATAATTTTTTTTATAGTTATACCTATTATAATAGGAGGATTTGGTAATTGAATATTACCCTTAATACTAGGAACCCCTGATATAGCTTTCCCTCGAATAAATAATTTAAGATTTTGATTATTACCTCCATCATTATTACTGTTAATTTCAAGAAGATTAGTAGAAAATGGAGCAGGAACAGGATGAACTGTTTACCCACCTTTATCCTCAAATATTTCTCACAGAGGAAGATCTGTAGACTTAGCAATTTTTTC…
RRSSC7852-15	BOLD:AAD6847	Diptera	Limoniidae	Limnophilinae	Euphylidorea platyphallus	AACACTATATTTCTTATTCGGAATATGAGCAGGTATAGTAGGTTCCGCCATAAGAATCATCATTCGTATTGAACTAGGACAACCAGGAAGATTTATTGGGGATGACCAAATCTATAATGTAGTAGTCACCGCTCACGCATTCGTAATAATTTTCTTTATAGTAATACCAATTATAATTGGGGGTTTTGGTAACTGATTAGTACCATTAATAATTGGAGCCCCTGATATAGCATTTCCTCGTATAAATAATATAAGATTCTGACTATTACCCCCTTCAATTACATTATTAATAATAAGTAGATTGGCTGAATCGGGAGCAGGGACTGGTTGAACCGTCTACCCCCCATTATCTAGTAATCTATCACACAGAGGAGCATCAGTAGACTTAGCTATTTTTTC…
RRGCO075-15	BOLD:ABA8907	Coleoptera	Chrysomelidae	Criocerinae	Crioceris asparagi	AACTTTATATTTTATTTTCGGTAGATGATCAGGATTATTAGGTACATCCTTAAGAATCCTAATTCGAACTGAATTAGGTACCACTAAATCTTTAATTAATAATGATCAAATCTATAATGTATTAGTTACAGCTCATGCTTTTATTATAATTTTTTTTATAGTAATACCAATTATAATTGGTGGATTTGGTAATTGACTTGTTCCATTAATGCTAGGAGCCCCAGATATAGCATTTCCACGAATAAATAATATAAGATTTTGATTATTGCCTCCTTCTTTAAATTTCTTACTTCTTAGAAGATTAGTAGAAAATGGTACGGGAACTGGTTGAACTGTTTACCCACCATTAGCAAGAAATGTCGGACATATAGGTAGTTCCGTTGATCTATCTATTTTTTC…
RRGCO252-15	BOLD:AAA5206	Lepidoptera	Erebidae	Herminiinae	Zanclognatha	AATATTATATATTATTTTTGCTTTATGATCAGGAATAATTGGAACTTCAATAAGATTCATTATTCGTATAGAATTAAGAAATCCTGGAGAATGAATTATAAATGATCAAATTTATAATTCTTTAGTTACAGCTCATGCCTTTTTAATAATTTTTTTTATAGTTATACCTTTTATAATTGGGGGGTTTGGTAATTGATTAGTTCCTTTAATATTAGGATGTCCTGATATAGCTTTCCCTCGAATAAATAATATTAGATTTTGATTATTGCCCCCATCATTAATTTTATTATTATTAAGAAATTTATTCAATATTACCCCAGGAACAGGATGAACAGTTTATCCTCCATTATCTTCATCAATATTTCATAGATCTCCATCAGTTGATTTAGCAATTTTTTC…
RRSSA3896-15	BOLD:AAC9780	Coleoptera	Cerambycidae	Lepturinae	Pidonia ruficollis	AACACTTTATTTTATATTTGGAATATGATCAGGAATAATTGGAATAATATTGAGAATAATTATTCGAATTGAATTAGGTCAACCAGGAGCATTTATTAACAATGATCAAATCTATAATACAATTATTACATCACATGCATTTATTATAATTTTCTTTATAGTTATACCAATTATAATTGGAGGATTTGGTAACTGACTATTACCTATTATAATTGGAGCTCCAGATATAGCATTTCCACGAATAAATAATATAAGATTCTGATTATTACCTCCATCAATTACAATATTATTAATTAGATCTATAGTTGAATCAGGAGTAGGAACTGGGTGGACAGTATATCCTCCTTTATCAAGAAATTTAGGTCACTCTGGGCCTAGAATTGAATTTGCAATTTTTTC…
RRMFG2329-15	BOLD:AAA2411	Lepidoptera	Noctuidae	Noctuinae	Orthodes cynica	TACTCTCTATCTAATATTTGGTGCATGAGCAGGTATAGTAGGTACTGCATTAAGTATATTAATTCGAATTGAATTAGGTCAACCAGGATCTTTAATTGGAGATGATCAAATTTACAATGTAATTGTAACTGCACACGCATTCGTTATAATTTTCTTTATAGTAATACCAATCATAATCGGGGGATTTGGAAACTGACTGGTTCCCTTAATATTAGGTGCTCCTGATATAGCTTTTCCACGACTAAATAATATAAGATTTTGATTATTACCTCCGTCATTAACCCTACTTCTAGCAAGAAGTCTAGTAGAAAGAGGGGCTGGTACAGGATGAACTGTATATCCACCCTTAGCTGGAGCTATTGCCCATGCAGGAGGGTCTGTAGATTTAACAATTTTCTC…
RRGCO561-15	BOLD:AAA7226	Lepidoptera	Erebidae	Herminiinae	Phalaenostola larentioides	AACTCTATATTTTATTTTTGGAATTTGAGCAGGTATAATTGGTACATCATTAAGTTTATTAATCCGAGCTGAATTAGGAAACCCAGGATCCTTAATTGGTGATGATCAAATTTATAATACTATTGTAACAGCTCATGCTTTTATTATAATTTTTTTTATAGTTATACCAATCATAATTGGAGGATTTGGAAATTGATTAATTCCTTTAATGCTAGGAGCTCCTGATATAGCTTTCCCCCGAATAAATAATATAAGATTTTGATTATTACCCCCATCAATTACATTGTTAATTTCAAGAAGAATTGTAGAAAATGGAGCAGGAACTGGATGAACAGTTTACCCCCCTTTATCCTCTAATATTGCTCATGGAGGAAGCTCTGTAGATTTAGCTATTTTTTC…
RRMFA243-15	BOLD:AAA4128	Lepidoptera	Noctuidae	Noctuinae	Orthosia hibisci	AACTTTATATTTTATTTTTGGAATTTGAGCAGGAATAGTAGGAACTTCCTTAAGACTATTAATTCGAGCAGAATTAGGAAACCCCGGATCCTTAATTGGAGATGATCAAATTTATAATACTATTGTTACAGCTCATGCCTTTATTATAATTTTTTTTATAGTTATGCCTATTATAATTGGAGGATTTGGAAATTGATTAGTTCCTTTAATATTAGGAGCCCCAGATATAGCTTTCCCCCGAATAAACAACATAAGATTTTGATTATTACCCCCTTCTTTAACTCTTCTTATTTCCAGAAGAATTGTAGAAAATGGAGCAGGAACTGGATGAACAGTTTACCCCCCTCTTTCATCTAATATTGCCCATGGAGGAAGATCTGTTGATTTAGCTATTTTCTC…
RRSSC7819-15	BOLD:AAU6544	Diptera	Limoniidae	Chioneinae	Ormosia affinis	AACATTATACTTTATTTTTGGAATTTGAGCCGGAATAGTAGGGACTTCATTAAGAATGCTAATCCGAGCAGAACTAGGAAATCCTGGATCATTAATCGGAGATGACCAAATTTACAACACAATTGTAACAGCGCATGCTTTTATTATAATTTTTTTTATAGTAATGCCAATTATAATTGGAGGATTTGGGAACTGATTAGTCCCCCTTATATTGGGAGCCCCTGATATGGCATTCCCACGAATAAATAATATAAGATTTTGATTATTACCCCCATCAATTACATTATTAATTAGAAGAAGAGTAGTTGAAAATGGAGCAGGAACTGGATGAACAGTTTACCCCCCACTATCATCCAATATTGCCCACAGAGGAAGCTCTGTGGATCTAGCAATTTTTTC…
RRMFG2299-15	BOLD:AAK7242	Coleoptera	Melandryidae	Melandryinae	Melandrya striata	AACTTTATACTTTTTATTTGGAGCATGAGCCGGTATAGTAGGAACCTCTCTAAGCATATTAATTCGTACAGAATTAGGTCACCCAGGATCACTAATTGGAGATGACCAAATTTATAACGTTATTGTTACAGCACATGCTTTTGTAATAATTTTTTTTATAGTAATGCCTATTATAATTGGAGGATTTGGAAATTGATTAGTGCCATTAATATTAGGAGCCCCAGATATAGCTTTCCCTCGTATAAATAATATAAGATTTTGAATATTACCCCCTTCTTTAACTTTATTGTTAGCTAGTAGAATAGTTGAAAACGGAGCAGGAACTGGATGAACAGTTTACCCTCCTTTATCTTCAGGTATTGCCCATGGAGGAGCATCTGTTGATCTAGCAATTTTTTC…
RRMFD055-15	BOLD:ABY8575	Diptera	Tachinidae	Exoristinae	Tachinomyia	AACATTATATTTCATTTTTGGATTCTGATCAGGAATAGTGGGAACATCTCTAAGAATTTTAATTCGAGCAGAATTAGGAAACCCCGGAACATTAATCGGAAATGACCAAATCTATAATTCAATTGTTACAGCCCATGCCTTCATCATAATTTTTTTTATAGTTATACCAATTATAATTGGAGGTTTCGGGAATTGACTAGTACCCCTAATACTAGGAGCACCAGATATAGCATTCCCACGATTAAACAACATAAGATTTTGGCTTCTACCACCTTCAATTACATTTTTAATTATAAGGAGAGTTATTGAAAGAGGAGCAGGAACAGGATGAACAGTATATCCACCATTATCCTCTAATATTGCTCACAGAGGGGCCTCTGTGGACATAGCAATTTTTAG…
RRMPA001-15	BOLD:AAC6088	Diptera	Syrphidae	Syrphinae	Syrphus torvus	AACTTTATATTTTTTATTTGGATTTTGATCAGGAATAATTGGAATATCATTTAGAATATTAATTCGAATAGAACTAGGAAGTCCTGGAGCAGTAATTGGAAATGATCAAATTTATAATGTAATCGTTACTTCTCATGCTTTTTTAATAATTTTTTTTATAGTAATACCAGTAATAATTGGTGGATTTGGAAATTGATTAATTCCTTTAATATTAGGGGCCCCTGATATAGCATTTCCACGATTAAATAATATAAGATTTTGATTTTTACCCCCATCAATTATTTTATTATTATCAAGAAGAATGGTAAATTCAGGTTCAGGAACTGGTTGAACTGTTTATCCACCTCTCTCAAGAAGAATTTCACACGCTGGACCATCTGTAGATTTAACTATTTTTTC…
RRSSA3894-15	BOLD:AAO0995	Coleoptera	Elateridae	Dendrometrinae	Athous haemorrhoidalis	AACTTTATACTTCATTTTCGGGGCATGATCCGGAATAATTGGTACTTCATTAAGTATTTTAATTCGAACTGAATTAGGACATCCAGGTTCATTAATTGGTGATGATCAAATTTATAATGTAATTGTTACAGCGCATGCATTTATTATAATTTTTTTTATAGTAATACCAATTATAATTGGAGGATTCGGAAATTGATTAGTTCCTTTAATATTAGGAGCCCCAGATATAGCATTCCCACGAATAAACAATATAAGTTTTTGATTACTTCCACCTTCATTAACACTTTTATTAGCAAGTAGTATAGTAGAAAACGGAGCTGGGACAGGATGAACAGTTTACCCACCTTTATCTTCAGTGATTGCTCATGGAGGAGCTTCTGTTGATTTAGCAATTTTTTC…
RRMPG974-15	BOLD:AAP8989	Diptera	Micropezidae		Compsobata univitta	AATAATATATTTCCTATTTGCATTATGATCAGGAATAATTGGAACTTCATTAAGAATAATTATTCGTATAGAATTAGGATCAGTTTCCCAATTAATTGGAGATGATCAAATTTATAATACTATTATTACTAGTCATGCCTTTATTATAATTTTTTTTATAGTAATACCATTTATAATTGGAGGATTTGGAAACTGATTAGTTCCATTAATACTAGGAGCACCAGATATAGCATTTCCTCGAATAAATAATATAAGATTTTGATTATTAATTCCATCATTAAGACTATTAATTTTTAGAAGAATTACAGATACAGGAACAGGAACAGGATGAACAGTTTATCCACCCCTTTCTTCATCACTTTACACAAGAGGTTATTCAGTTGATCTCTCAATTTTTTC…
RRMFD560-15	BOLD:AAD4513	Coleoptera	Cerambycidae	Cerambycinae	Cyrtophorus verrucosus	AACATTATATTTTATTTTTGGATTTTGATCTGGAATATTAGGATTATCATTTAGAATATTAATTCGAACAGAATTAGGAATACCTGGATCAATAATTGGAGATGATCAAATTTATAATGTAATTGTAACATCACATGCATTTTTAATAATTTTTTTTATAGTTATACCTATTATAATTGGAGGTTTTGGAAATTGATTAGTCCCTTTAATATTAGGAGCACCAGATATAGCATTTCCTCGATTAAACAACATAAGATTTTGATTTTTACCACCTTCAATCACTCTTATTCTTTCAAGAAGATTAGTAAATTCTGGTTCAGGAACAGGATGAACTGTTTATCCACCCCTATCTAGAGGAATATCACACGCTGGAGCTTCAGTAGATTTAACAATTTTCTC…
RRMPG978-15	BOLD:AAB8911	Coleoptera	Curculionidae	Entiminae	Polydrusus formosus	TATTCTTTATTTTATTTTAGGATTATGATCTGGAATAATTGGATCTTCTATAAGTATTATTATTCGTATAGAATTAGGTAATCCAAATTCATTAATTAATAATGATCAAATTTACAATTCTATTATTACTGCTCACGCTTTTATTATAATTTTTTTTATAGTAATGCCTATTATAATTGGAGGGTTTGGAAATTGATTAATCCCCCTTATATTAGGAGCTCCTGATATAGCATTTCCACGAATAAATAACATAAGATTTTGATTATTAATTCCCTCATTAATAATATTAATTTCAAGAAATATTATAAATCAAGGAATTGGAACTGGGTGAACAGTCTACCCCCCATTATCTTCTAATATTAATCATGAAGGAAATTCTCTAGATTTAGGAATTTTTTC…
RRSSC4805-15	BOLD:AAA3561	Lepidoptera	Nymphalidae	Satyrinae	Coenonympha	AACTTTATACTTCATTTTTGGTATTTGAGCAGGAATAGTCGGTACTTCCTTAAGTTTATTAATTCGAGCAGAATTAGGAAATCCAGGACAATTAATTGGAGATGATCAAATTTATAATACTATTGTTACAGCTCACGCTTTTATTATAATTTTTTTCATAGTTATACCTATTATAATCGGAGGATTTGGAAATTGATTAGTACCTTTAATATTAGGAGCTCCAGATATAGCATTTCCACGAATAAATAATATAAGATTTTGACTTTTACCTCCTTCATTAACTTTATTGATTTCTAGAAGAATTGTAGAAAATGGAGCTGGAACAGGATGAACTGTTTACCCACCTTTATCATCTAATATTGCTCACGGAGGTAGTTCAGTTGATTTAGCTATTTTTTC…
RRSSC7787-15	BOLD:AAI1582	Diptera	Syrphidae	Microdontinae	Microdon tristis	TATATTATATTTTATCTTTGCTATATGATCTGGTATAATTGGAGCTTCTCTAAGTATAATTATTCGAATAGAATTAAGATGCCCTGGTGCATGAATTAATAATGATCAAATTTATAATACAATTATTACTTCACACGCCTTCATTATAATTTTTTTTATAGTTATACCATTTATAATTGGAGGTTTTGGAAATTGATTAGTTCCATTAATAATTGGAGCTCCTGATATAGCTTTCCCACGTATAAATAATATAAGATTTTGATTATTACCCCCTTCACTTCTTATATTATTAATAAGTGGAATTTTAGGAGCTGGTTCAGGTACTGGATGAACTATTTATCCACCTTTATCATCCTTTATTTATCACTCTTCTTCCTCAATAGATTTTACTATTTTTTC…
RRSSC4125-15	BOLD:AAH0915	Coleoptera	Cantharidae	Cantharinae	Atalantycha bilineata	AACTTTATATTTTATTTTTGGAGCTTGAGCAGGAATAGTAGGAACTTCTCTTAGTATATTAATTCGAGCAGAATTAGGACACCCGGGTTCATTAATTGGAGATGATCAAATTTATAATGTTATTGTAACTGCTCATGCATTTGTAATAATTTTTTTTATAGTTATACCTATTATAATTGGAGGATTCGGAAATTGATTAGTTCCATTAATATTAGGAGCGCCAGATATAGCTTTTCCTCGAATAAATAATATAAGATTCTGAATATTACCTCCATCCCTTACATTACTATTAACTTCTTCAATAGTAGACGCAGGGGCTGGTACTGGATGAACAGTATACCCTCCTTTAGCAGCTGGAATTGCTCATAGAGGAGCATCAGTAGATTTAGCAATTTTTTC…
RRMFD008-15	BOLD:AAG8827	Hemiptera	Aphrophoridae	Aphrophorinae	Lepyronia quadrangularis	AATTTTATATTTCTTATTTGGCATATGAGCTGGAATAATTGGATCATCTTTTAGTATAATCATTCGAATAGAACTTGGAAATCCTGGATTCCTTATTAATAATGATCAAATTTACAATTCAATTGTTACTATACATGCATTCATCATAATTTTTTTTATAGTAATACCCATTATAATTGGAGGATTTGGAAATTGACTAACCCCTTTAATATTAGGTGCCCCTGATATAGCTTTCCCCCGAATAAATAATATAAGATTTTGATTATTACCACCATCACTTTTTTTATTAATTAATAGTTCATTTATTAATCAAGGAGTTGGGACAGGTTGAACTATATACCCCCCCCTATCATCTAATATTAATCATGAAGGTATATCAATAGATTTATCAATTTTTTC…
RRGCO550-15	BOLD:AAB2626	Lepidoptera	Ypsolophidae	Ypsolophinae	Ypsolopha dentella	AACACTATATTTTATTTTTGGAATTTGAAGAGGAATAGTAGGAACATCCTTAAGATTATTAATTCGCGCTGAATTAGGAAACCCAGGATCATTAATTGGCGATGATCAAATTTATAATACTATTGTTACAGCTCATGCATTTATTATAATTTTTTTTATAGTTATACCTATTATAATTGGGGGATTTGGAAATTGATTAGTCCCCTTAATATTAGGAGCCCCAGATATAGCATTCCCTCGAATAAATAACATAAGATTTTGATTATTACCCCCCTCTTTAACTTTACTGATTTCTAGAAGAATTGTAGAAAATGGAGCTGGAACAGGATGAACGGTTTACCCCCCCCTTTCATCTAATATTGCTCACAGAGGAGGATCTGTTGATTTAACTATTTTCTC…
RRMFI4172-15	BOLD:AAE2237	Hymenoptera	Ichneumonidae	Banchinae	Banchus	AACATTATACTTTATTTTTGGGGCTTGAGCAGGAATAGTAGGAACTTCTTTAAGAATTTTAATTCGGGCTGAATTAGGACATCCTGGAGCATTAATTGGTGATGATCAGATTTATAATGTAATTGTCACAGCTCATGCTTTTATTATAATTTTCTTCATAGTAATACCTATTATAATTGGAGGATTTGGAAATTGATTAGTTCCATTAATATTAGGAGCCCCTGATATAGCTTTCCCACGAATAAATAATATAAGATTTTGAATACTACCTCCTTCTATTACTCTATTAGTATCTAGTAGTTTAGTCGAAACAGGAGCAGGAACAGGTTGAACAGTATACCCCCCACTTTCATCTGGAATTGCTCATGCTGGAGCATCTGTAGATTTAGCAATTTTCTC…
RRGCO694-15	BOLD:AAA1517	Lepidoptera	Tortricidae	Tortricinae	Choristoneura rosaceana	AACTTTATATTTTATCTTTGGAGCTTGATCAGGAATAATTGGAACTTCATTAAGTATTTTAATTCGAACTGAATTAGGACATCCTGGAGCTTTAATTGGTGACGATCAAATTTATAATGTAATTGTAACAGCTCATGCTTTTGTAATAATTTTCTTTATAGTAATACCTATTATAATTGGTGGATTTGGAAATTGATTAGTACCTTTAATACTTGGAGCTCCAGATATAGCATTTCCTCGAATAAATAATATAAGATTCTGACTTTTACCTCCTGCTTTAATTTTATTACTAACTAGCAATATAGTTGAAAATGGAGCTGGAACAGGATGAACTGTTTATCCACCCCTATCTTCAAATATTGCTCATAGAGGAGCTTCTGTAGATTTAACAATTTTTTC…
RRSSA4311-15	BOLD:AAH6798	Coleoptera	Scarabaeidae	Melolonthinae	Serica	AATATTATATTTCATTTTTGCTATATGAGCAGGGATAATTGGAACATCGTTAAGAATAATTATTCGAATAGAATTAAGAATACCTGGAATATGAATTAATAATGATCAAATATATAATACTATTGTTACATCACATGCATTTATTATAATTTTCTTTATAGTTATACCATTTATAATTGGAGGATTCGGAAATTGATTAATTCCTATTATAATTGGAGCTCCAGATATAGCTTTTCCACGAATAAATAATATAAGATTTTGATTATTACCACCATCTTTAATATTATTATTAATAAGAAGAAGTTTATACTCAGGATCAGGTACTGGATGAACAATTTATCCTCCATTATCATCTTCTATATACCATCCTTCATTATCTGTAGACTTTACAATCTTTTC…
RRSSA2273-15	BOLD:AAF4976	Coleoptera	Lampyridae	Lampyrinae	Ellychnia	AACTTTATATTTTATTTTCGGAGCATGATCTGGAATAATTGGAACTTCATTAAGTATTTTAATTCGAACTGAATTAGGACATCCTGGCTCATTAATTGGTGATGATCAAATTTATAATGTAATTGTTACAGCTCATGCATTTATTATAATTTTTTTTATAGTAATACCTATTATAATTGGAGGATTTGGAAATTGATTAGTACCTTTAATATTAGGGGCTCCAGATATAGCTTTCCCACGAATAAATAATATAAGTTTTTGATTACTTCCTCCTTCATTAACACTTTTATTAGCAAGTAGTATAGTAGAAAATGGAACTGGGACAGGATGAACAGTTTACCCACCTTTATCTTCAGTGATTGCTCATGGAGGGTCTTCTGTTGATTTATCAATTTTTTC…
RRMFC2065-15	BOLD:AAE0948	Diptera	Syrphidae	Eristalinae	Ferdinandea buccata	AACTTTATATTTTATTTTTGGAGCATGATCAGGAATGGTGGGAACCTCATTAAGTATTTTAATTCGAGCTGAATTGGGGCACCCTGGAGCATTAATTGGAGATGATCAAATTTATAATGTAATTGTAACAGCTCATGCTTTTATTATAATTTTCTTTATAGTAATACCTATTATAATTGGAGGGTTCGGAAATTGACTAGTTCCTTTAATATTAGGTGCCCCAGATATAGCCTTCCCTCGAATAAATAATATGAGTTTTTGACTTCTACCCCCCGCATTAACTTTATTGTTGGTAAGAAGTATAGTAGAAAATGGAGCTGGGACAGGATGAACTGTTTACCCTCCCTTATCTTCTAATATTGCCCATGGTGGAGCTTCTGTTGATTTAGCAATTTTTTC…
RRSSA5999-15	BOLD:AAF9008	Diptera	Limoniidae	Limoniinae	Helius flavipes	AACTTTATATTTTATTTTTGGAATTTGAGCCGGAATAATTGGAACTTCATTAAGATTGCTAATTCGAGCTGAATTAGGTACCCCAGGATCTTTAATTGGAGATGATCAAATTTATAATACTATTGTAACTGCCCATGCTTTTATTATAATTTTCTTTATAGTTATACCAATTATAATTGGTGGGTTTGGTAATTGATTAGTCCCTTTAATATTAGGAGCCCCTGATATAGCTTTCCCACGAATAAATAATATAAGTTTCTGACTCTTACCCCCCTCTTTGACTTTACTGATTTCAAGTAGAGTTGTAGAAAATGGAGCTGGAACAGGATGAACAGTTTACCCCCCACTTTCATCTAATATTACACACAGTGGAAGATCTGTAGATTTAGCTATTTTTTC…
RRMFI4068-15	BOLD:ADK6725	Diptera	Tachinidae	Exoristinae	Compsilura concinnata	AACTTTATATTTCATTTTTGGAGCTTGAGCCGGAATAGTAGGAACTTCTTTAAGTATACTAATTCGATTAGAATTAGGTCACCCTGGAGCTATAATTGGCAATGATCAAACTTATAATGTAATTGTTACAGCTCATGCTTTTATTATAATTTTTTTTATAGTAATACCAATTATAATTGGTGGATTTGGAAATTGATTAGTTCCTTTAATATTAGGTGCCCCTGATATAGCATTTCCTCGAATAAATAATATAAGTTTTTGATTACTTCCACCTTCTTTAATTTTACTATTGATAAGTAGTATAGTTGAAAACGGAGCTGGAACAGGATGAACAGTTTACCCACCACTTTCAGCTAATATTGCTCATAGAGGAACTTCTGTTGATTTAGCAATTTTTTC…
RRMFG2635-15	BOLD:AAC6974	Diptera	Dryomyzidae	Dryomyzinae	Dryomyza anilis	AACATTATATTTCATCTTTGGAATTTGAGCAGGATTACTAGGCACCTCACTTAGTGTACTTATTCGAATAGAATTAAGAACCCCAGGAACTTTTATTGGAAATGACCAACTTTATAACGTAATAGTTACATCACATGCTTTTTTAATAATTTTCTTTATAATTATACCTATCATAATTGGGGGATTTGGAAATTGATTAGTTCCTCTTATAATTGGAGCTCCAGATATAGCATTCCCCCGAATAAACAATATAAGATTTTGACTCTTACCCCCATCTATTACTCTTCTACTAATTAGATCAATAGTAGAAAAAGGAGCTGGAACTGGATGAACAGTATACCCCCCATTATCAGCTAACATTGCTCATTCAGGAAAATGCGTTGATTTAACCATTTTCTC…
RRGCO365-15	BOLD:AAA7528	Lepidoptera	Tortricidae	Olethreutinae	Epinotia nisella	AACACTTTATTTTATTTTTGGAATTTGAGCAGGAATATTAGGAACTTCTTTAAGATTATTAATTCGAGCTGAATTAGGTAATCCAGGATCTTTAATTGGAGATGATCAAATTTATAATACTATTGTAACAGCACATGCTTTTATTATAATTTTTTTTATAGTAATACCAATTATAATTGGAGGATTTGGAAATTGATTAGTACCATTAATATTAGGGGCTCCTGATATAGCATTCCCACGAATAAATAATATAAGATTTTGATTATTACCCCCCTCTATTACTTTACTAATTTCTAGAAGAATTGTAGAAAATGGAGTAGGTACTGGATGAACAGTTTACCCCCCACTATCATCTAATATCGCTCATGGAGGAAGATCCGTTGATTTAGCAATTTTTTC…
RRGCO183-15	BOLD:AAC0644	Lepidoptera	Noctuidae	Noctuinae	Amphipoea americana	AATATTGTATTTTTTTTTTGGAATATGGGCTGGTATAGTAGGTTTATCAATAAGATTAATTATTCGTTTAGAATTGGGTTTACCTGGTAGAATATTGGGTAATGATCAAATTTATAATAGAATAGTAACTTCACATGCTTTTGTTATAATTTTTTTTATAGTAATACCAATTATATTAGGGGGTTTTGGAAATTGATTAATTCCTTTAATATTAGGGGCTCCTGATATAGCTTTCCCTCGAATAAATAATATAAGATTTTGATTATTATTTCCTTCATTAATTTTATTAATTTTAAGTGGATTTGTTAATGTTGGGGTTGGAACTGGATGAACAGTTTATCCTCCTTTATCTTCTATTATAGGTCATTCAGGTATTTCTGTTGATTTAGTTATTTTTTC…
RRMFD050-15	BOLD:AAG4679	Diptera	Syrphidae	Eristalinae	Chalcosyrphus libo	AACTTTATATTTTATTTTTGGTGCATGATCAGGAATAGTAGGAACTTCCTTAAGTATATTAATTCGAGCTGAATTAGGAAATCCAGGATCATTAATTGGTGACGATCAAATTTATAATGTTATTGTTACTGCTCATGCATTTGTCATAATTTTTTTTATAGTAATACCAATTATAATTGGAGGATTTGGAAATTGATTAGTTCCTTTAATATTAGGAGCTCCTGATATAGCTTTTCCTCGAATAAATAATATAAGTTTTTGATTACTTCCTCCTTCTTTAACTCTTTTATTAATGAGAAGAATAGTGGAAAGTGGAGCAGGTACAGGATGAACAGTCTACCCACCCCTATCTTCTGGTATTGCACATGCTGGAGCATCTGTTGATTTAGCTATTTTTAG…
RRGCO534-15	BOLD:AAA7368	Lepidoptera	Cosmopterigidae	Cosmopteriginae	Limnaecia phragmitella	TACACTTTACTTTATTTTCGGAATATGATCAGGTATAGTAGGTACCGCAATAAGATGAATCATCCGAGTAGAGCTCGGACAACCGGGCACTTTCATTGGAGATGATCAAATCTATAATGTAATTGTTACAGCTCACGCATTTATTATAATTTTCTTCATAGTAATACCAATCATAATTGGAGGATTCGGTAATTGACTAGTACCCTTAATAATTGGAGCCCCAGATATAGCCTTTCCCCGAATAAATAATATAAGATTCTGATTATTACCCCCCTCACTAACATTATTATTAATAAGTAGCCTAGTAGAAATAGGAGCAGGAACAGGATGAACAGTTTATCCTCCACTATCAAGAAATCTATCACATAGAGGTGCATCCGTAGATTTAGCAATCTTCTC…
RRMFB1224-15	BOLD:AAP8654	Diptera	Tachinidae	Exoristinae	Tachinomyia panaetius	AACATTATATTTTTTATTTGGAACATGAGCTGGAATAGTGGGGACATCCTTAAGAATTTTAATTCGTGCAGAATTAGGACACCCTGGAGCATTAATTGGAGATGATCAAATTTATAATGTAATTGTTACTGCTCATGCTTTTGTAATAATTTTTTTTATAGTAATACCTATTATAATTGGAGGATTTGGAAATTGATTAGTTCCTTTAATATTAGGTGCTCCTGATATAGCATTTCCTCGAATAAATAATATAAGTTTTTGATTATTACCTCCTTCTTTAACTTTATTATTAGTAAGTAGTATAGTAGAAAATGGAGCTGGAACTGGATGAACAGTTTATCCTCCTCTTTCAGCAAGTATTGCTCATGGAGGAGCTTCTGTTGATTTAGCTATTTTTTC…
RRSSC1966-15	BOLD:AAP8833	Diptera	Anthomyiidae	Anthomyiinae	Eustalomyia festiva	TACTTTATATTTTATTTTTGGAGCCTGAGCTGGCATAGTAGGAACATCCCTTAGTGTTTTAATTCGAGCTGAATTGGGTCATCCAGGAGCTCTAATTGGTGACGATCAAATTTATAATGTAATTGTTACTGCTCATGCTTTTATTATAATTTTTTTTATAGTTATACCAATTATAATTGGAGGATTTGGAAATTGATTAGTTCCTTTAATACTTGGTGCACCAGATATAGCTTTCCCTCGAATAAATAATATAAGTTTTTGAATATTACCCCCATCTCTTACCCTTCTTCTTGCTAGAAGCTTAGTTGAAAATGGAGCTGGAACAGGATGAACAGTTTATCCTCCTTTATCAGCGGGAATTGCCCATGCAGGAGCTTCTGTCGATTTAGCTATTTTTTC…
RRGCO601-15	BOLD:AAB0338	Lepidoptera	Drepanidae	Drepaninae	Eudeilinia herminiata	AACTCTTTATTTTATTTTCGGAATTTGATCTGGATTAGTAGGATCCTCTTTAAGATTCCTTATTCGAATTGAACTTAGAACTCCTGGGTCTTTAATTGGAAATGACCAAATTTATAATGTAATTGTCACTTCTCATGCATTTATTATAATTTTCTTTATAGTTATACCCATTATAATTGGAGGATTTGGAAATTGATTAGTTCCTTTAATATTAGGATCCCCAGATATAGCTTTCCCTCGAATAAATAATTTAAGATTTTGATTTTTACCTCCTTCATTACTCCTTCTAATTTTAAGAAGAATAATAAATTCAGGGGCTGGCACAGGTTGAACTGTTTACCCTCCTCTATCATCAAATCTATCTCACCTTGGGAGATCAGTAGATTTAACTATTTTCTC…
RRMPG961-15	BOLD:AAH0318	Coleoptera	Cantharidae	Cantharinae	Podabrus intrusus	AACTTTATATTTTATTTTTGGAATTTGATCAGGAATACTAGGAACATCTTTAAGTATGTTAATTCGAGCAGAATTAGGAAATCCTGGATCTTTAATCGGAGATGATCAGATTTATAATACAATTGTAACTGCTCATGCTTTCATTATAATTTTTTTTATAGTTATGCCAATTATAATTGGAGGATTTGGAAATTGATTAGTACCATTAATATTAGGAGCACCTGATATGGCCTTCCCACGACTTAATAATATAAGTTTTTGACTTTTACCACCTTCTTTAGCCTTACTAATTTCTAGTAGAATTGTGGAAAATGGAGCAGGAACAGGATGAACAGTGTACCCCCCACTCTCATCCAATATTGCCCATAGAGGAAGTTCTGTAGATCTAACAATTTTCTC…
RRSSC4130-15	BOLD:ACA9847	Coleoptera	Erotylidae	Languriinae	Acropteroxys	AACTTTATATTTTATTTTTGGAATCTGATCTGGTATAATTGGTACTTCTTTAAGTCTTTTAATTCGAACTGAATTAGGTAATCCTGGGTCACTCATTGGAGATGATCAAATTTATAATACAATTGTTACTGCTCACGCTTTTATTATAATTTTTTTTATAGTTATACCAATTATAATTGGAGGATTTGGTAATTGATTAATCCCCCTTATATTAGGAGCCCCTGATATAGCATTCCCCCGAATAAATAATATAAGATTTTGACTTTTACCTCCTTCTCTAATTCTTCTTATTTCTAGAAGTATTGTTGAAAATGGGGCAGGAACTGGTTGGACAGTATACCCCCCTTTATCTTCTAATATCGCCCATAGAGGAAGTTCTGTAGATTTAGCTATTTTTTC…
RRSSA229-15	BOLD:AAG2460	Diptera	Anthomyiidae	Anthomyiinae	Hydrophoria lancifer	AACTCTTTATTTTATATTTGGGGCTTGAGCTGGAATAGTGGGAACTTCTTTAAGAATTCTAATTCGAGCCGAATTAGGGCATCCAGGAGCCTTAATTGGGGATGACCAAATTTATAATGTTATTGTAACAGCTCATGCTTTTGTTATAATTTTTTTTATAGTTATACCTATTATAATTGGAGGATTTGGTAATTGATTGGTCCCCTTAATATTAGGAGCCCCTGATATAGCATTTCCTCGAATAAATAATATAAGTTTTTGAATACTTCCCCCATCATTAACCCTTTTATTAGCAAGCAGTATAGTAGAAAATGGGGCAGGGACAGGATGAACAGTTTACCCTCCACTATCTGCAGCAATTGCTCATGGAGGAGCTTCTGTTGACTTAGCTATCTTTTC…
RRMPE026-15	BOLD:AAB9140	Diptera	Calliphoridae		Phormia regina	AACATTATATTTTATTTTTGGAATTTGAGCTGGAATAGTAGGAACCTCATTAAGATTATTAATTCGAGCTGAATTAGGAAATCCTGGATCATTAATTGGAGATGATCAAATTTATAATACAATTGTAACAGCCCATGCTTTTATTATAATTTTTTTTATAGTTATACCTATTATAATTGGAGGATTTGGTAATTGATTAGTACCTTTAATATTAGGAGCTCCAGATATAGCATTTCCTCGAATAAATAATATAAGTTTTTGACTTCTTCCCCCATCTTTAACTTTATTAATTTCAAGAAGAATTGTAGAAAATGGAGCAGGAACAGGATGAACAGTGTACCCCCCACTTTCTTCTAATATTGCTCATGGAGGTAGATCTGTAGATCTTGCTATTTTTTC…
RRGCO486-15	BOLD:ACE9865	Lepidoptera	Noctuidae	Noctuinae	Feltia tricosa	AACATTATATTTTATTTTTGGTATTTGAGCTGGAATAGTAGGAACTTCTTTAAGTTTATTAATTCGAGCTGAATTAGGAAATCCAGGATCTTTAATTGGAGATGATCAAATTTATAACACTATTGTTACAGCACATGCTTTTATTATAATTTTTTTCATAGTAATACCTATTATAATTGGAGGATTTGGTAATTGACTTGTTCCTTTAATATTAGGAGCTCCAGATATAGCATTTCCTCGAATAAATAATATAAGTTTTTGACTTCTTCCCCCCTCATTAACTTTATTAATTTCGAGAAGAATTGTAGAAAATGGAGCAGGAACAGGATGAACAGTTTACCCCCCACTTTCATCTAATATTGCTCATGGAGGAAGATCAGTAGATTTAGCTATTTTTTC…
RRMFI4226-15	BOLD:AAI7042	Coleoptera	Cerambycidae	Lepturinae	Gaurotes cyanipennis	AGTTTTATATTTTATTTTTGGAATATGAGCAGGAATAATTGGTTCTTCTATAAGATTAATTATTCGTATAGAATTAGGAAATCCAGGATTTTTAATTAATAATGATCAAATTTATAATTCTTTTGTTACAGCCCATGCATTTATTATAATTTTTTTTATAGTTATACCAATTATAATTGGAGGATTCGGAAATTGATTAATCCCTTTAATATTAGGATCTCCTGATATAGCCTTTCCTCGAATAAATAATATAAGATTTTGACTTCTTCCCCCTTCAATTATATTATTAATTTTTAGATCTTTAACAAATACAGGAGTTGGAACTGGATGAACAGTTTATCCTCCATTATCATTAAATATTAATCATGAAGGAATATCAGTAGATATAGCAATTTTTTC…
RRSSA3974-15	BOLD:AAG1701	Diptera	Muscidae	Coenosiinae	Macrorchis ausoba	GACCCTATATTTTATATTTGGTATTTGAGCTGGAATGCTTGGAACATCCCTTAGATGACTAATTCGTATTGAATTAGGACACCCCGGATCTTTTATTGGGGATGATCAAATTTATAATGTAATTGTTACTGCACATGCTTTTATTATAATTTTCTTTATGGTTATACCTATTATAATTGGAGGATTTGGTAACTGACTAGTCCCATTAATAATTGGGGCACCAGATATAGCATTCCCTCGTATAAATAATATAAGTTTCTGACTACTACCTCCTTCAATTACATTATTAATTATTAGAAGAATTGTAGAAAAGGGGGTAGGAACAGGATGAACAGTTTATCCTCCTCTATCAGCTAACGTAGCCCATAATGGTGCATCAGTGGATCTAGCCATTTTCAG…
RRSSC1986-15	BOLD:AAV3887	Diptera	Dolichopodidae	Dolichopodinae	Dolichopus comatus	AACTCTGTACTTTATCTTTGGCGCATGGGCAGGTATACTAGGAACATCCCTAAGCCTATTAATCCGCGCCGAATTAGGAAACCCTGGATCTCTAATCGGTAATGATCAAATTTACAACGTCATTGTTACTGCACACGCATTCATCATAATTTTCTTCATAGTTATACCAATCATAATCGGAGGATTTGGAAATTGATTAGTACCATTAATGCTAGGAGCCCCAGACATAGCTTTCCCTCGAATGAATAACATAAGATTTTGACTCCTACCACCCTCATTAAGACTTCTTCTGATAAGAAGAATCGTAGAAAATGGAGCAGGAACAGGATGAACTGTTTACCCCCCACTTTCATCCAACATTGCCCATAGAGGTTCCTCAGTAGACCTGGCTATTTTTAG…
RRGCO473-15	BOLD:AAA4729	Lepidoptera	Crambidae	Pyraustinae	Anania tertialis	AACGTTATATTTTATTTTTGGAATTTGAGCAGGGATAGTTGGAACTTCTTTAAGTTTATTAATTCGTGCAGAATTAGGAAACCCAGGATTTTTAATTGGAGATGATCAAATTTACAATACTATTGTTACAGCTCATGCCTTTATTATAATTTTTTTTATAGTTATACCAATTATAATTGGAGGATTTGGAAATTGATTAGTACCTTTAATATTAGGGGCTCCTGATATAGCTTTCCCACGAATAAATAATATAAGATTTTGATTATTACCCCCCTCTTTAATATTATTAATTTCAAGAAGAATTGTAGAAAATGGAGCTGGAACAGGATGAACAGTTTACCCTCCCCTCTCATCTAACATTGCTCATGGGGGAAGATCAGTTGACTTAGCAATTTTCTC…
RRSSA4461-15	BOLD:AAN8383	Hemiptera	Membracidae	Smiliinae	Cyrtolobus	AACTCTTTACTTTATTTTTGGGGCTTGAGCAGGTATAATAGGAACATCTTTAAGAATTCTTATTCGAGCTGAACTAGGACATGCAGGATCTCTAATTGGTGATGATCAAATCTATAATGTTATTGTTACTGCTCACGCATTCGTCATAATTTTCTTTATAGTTATACCTATTATAATTGGAGGATTTGGAAATTGACTTGTCCCATTAATATTAGGAGCCCCTGATATAGCCTTTCCCCGAATAAATAATATAAGTTTCTGGCTTCTACCTCCATCATTAACCCTTCTTCTAGCAAGAAGTATAGTTGATAACGGAGCAGGGACAGGATGAACAGTTTATCCACCCCTATCAGCAGGAATTGCTCATGGAGGAGCATCTGTAGATTTAGCAATCTTTTC…
RRSSC4131-15	BOLD:AAD7604	Coleoptera	Coccinellidae	Coccinellinae	Coleomegilla maculata	AACTCTTTATTTTATTTTTGGAGCTTGAGCAGGAATAGTTGGAACATCTATAAGATTACTAATTCGAACTGAATTAGGAAACCCCGGATCTTTAATTGGAGATGATCAAATTTATAATGTAATTGTTACAGCTCATGCTTTTGTCATAATTTTTTTTATAGTTATACCCATTATAATTGGAGGATTCGGAAATTGATTAGTTCCCCTTATATTAGGAGCCCCTGATATAGCTTTTCCCCGAATAAATAATATAAGATTTTGACTACTTCCACCTTCATTAACTCTTTTATTAATAAGAAGAATTGTAGAAAAAGGAGCAGGAACAGGATGAACGGTTTATCCCCCCCTTTCATCAAATATTGCTCATGGTGGTTCTTCTGTTGATTTAGCTATTTTTAG…
RRGCO061-15	BOLD:AAB0052	Lepidoptera	Noctuidae	Oncocnemidinae	Calophasia lunula	AATTCTATATTTTATCTTTGCTATTTGATCGGGAATAATTGGCTCCTCTATAAGAATAATCATTCGACTAGAGTTAGGATCTCCTGATTCACTAATTCTTAATGATCAAACTTTCAATACCATCGTTACAAGTCATGCTTTTATTATAATTTTTTTTATAGTTATACCTTTTATAATTGGGGGATTTGGTAATTTTTTAATTCCACTTATACTAGGATCTCCTGATATAGCTTACCCTCGTTTAAATAACATAAGATTTTGATTACTTCCCCCATCGATCTCCTTATTAATCCTAAGAAATTTTATTAATGAAGGATCTGGAACTGGTTGAACTATCTACCCCCCTCTATCATCAAATACCTTCCATAGTGGCCCCTCTATTGACCTGACTATCTTTTC…
RRGCO580-15	BOLD:AAA2518	Lepidoptera	Crambidae	Crambinae	Chrysoteuchia topiarius	AACACTATACTTCATATTCGGAATATGGTCAGGAATAATTGGAATAATATTAAGAATAATTATTCGAGTTGAATTAGGTCAACCCGGGCCATTTATTAATAATGATCAAATCTATAATACAATCATTACATCACATGCATTTATTATAATCTTCTTTATAGTAATACCAATTATAATTGGGGGGTTTGGGAACTGGCTTATACCAATTATAATTGGAGCCCCTGATATAGCATTTCCACGAATAAACAATATAAGATTTTGATTATTACCGCCATCAATTACAATATTACTAATTAGATCTATAGTTGAATCAGGAGTAGGAACTGGATGAACAGTATACCCCCCACTATCAAGAAACATAGGTCACTCTGGTCCTAGAGTTGAATTTGCAATCTTTTC…
RRMFC1694-15	BOLD:AAP8757	Diptera	Syrphidae	Eristalinae	Brachypalpus oarus	AATTTTATATATTATATTTGCTATATGATCAGGTATAATCGGAGCATCAATAAGATTAATTATTCGAATAGAATTAAGAACCCCAGGAAATTGAATTAATAATGATCAAATTTATAACTCATTAGTTACTGCTCATGCCTTTTTAATAATTTTTTTTATAGTTATACCATTTATAATTGGGGGATTTGGAAATTGATTAATCCCTCTAATATTAGGATCACCAGATATATCTTTTCCTCGTTTAAATAATATTAGTTTTTGATTATTACCCCCATCATTACTACTATTATTATTAAGAAATTTATTTTCAATAAGACCAGGAACAGGATGAACTGTTTATCCACCTTTATCATCATATTTATTTCACCCATCCCCATCAGTAGACTTAGCTATTTTTTC…
RRGCO646-15	BOLD:AAA4271	Lepidoptera	Geometridae	Larentiinae	Costaconvexa centrostrigaria	AACTTTATATTTTATTTTTGGAATTTGAGCAGGTATAGTAGGGACATCTCTTAGCTTAATTATTCGAATAGAATTAGGTAATCCAGGATTTTTAATTGGAGATGATCAAATTTATAATACTATCGTTACAGCTCATGCTTTTATTATAATTTTTTTTATAGTAATACCAATTATAATTGGAGGATTTGGTAATTGATTAGTTCCATTAATATTAGGAGCTCCTGATATAGCTTTTCCTCGTATAAATAATATAAGATTTTGATTATTACCTCCTTCATTAATTTTATTAATTTCAAGAAGTATTGTAGAAAATGGAGCTGGTACAGGATGAACAGTTTACCCACCCCTTTCATCTAATATCGCCCATAGAGGATCTTCAGTAGATCTAGCAATTTTCTC…
RRSSA3965-15	BOLD:AAB7401	Coleoptera	Cerambycidae	Lepturinae	Trachysida mutabilis	AGTATTATACTTTATATTTGGAATATGAGCAGGAATAATTGGTTCATCTATAAGTATTATTATTCGTATAGAATTAGGTAATCCAGGTATATTTATCAATAACGACCAAATTTATAATTCTATTGTTACAGCTCATGCCTTTATTATAATTTTTTTTATAGTTATACCAATTATAATTGGAGGATTTGGAAATTGATTAATCCCATTAATACTTGGAGCCCCAGATATATCTTTCCCTCGAATAAATAACATAAGATTTTGATTATTACCCCCTTCATTACTTTTTCTTATTAATAGAAGAATAATTAATCAAGGTGTTGGAACCGGTTGAACTGTCTATCCACCTTTATCTTTAAATATTAATCATGAAGGTATATCAGTAGATATCGCAATTTTTTC…
RRMFB1097-15	BOLD:AAJ9649	Diptera	Xylophagidae	Xylophaginae	Xylophagus lugens	AACTTTATATTTTATTTTTGGAATTTGAGCAGGAATAGTAGGAACATCATTAAGTTTATTAATTCGAGCTGAATTAGGAAATCCAGGATCTTTAATCGGAGATGATCAAATTTATAATACTATTGTTACTGCACATGCTTTTATTATAATTTTTTTTATAGTTATACCAATTATAATTGGAGGATTTGGTAATTGATTAGTACCTTTAATACTTGGAGCTCCAGATATAGCATTCCCACGAATAAATAATATAAGATTTTGATTACTACCCCCTTCAATTACATTATTAATTTCTAGAAGAATTGTAGAAAATGGGGCAGGAACAGGATGAACAGTTTATCCTCCTCTATCTTCTAATATTGCTCATGGAGGAAGTTCTGTTGATTTAGCTATTTTTTC…
RRSSA2285-15	BOLD:AAU6970	Coleoptera	Cleridae	Clerinae	Enoclerus nigripes rufiventris	AATCTTATATTTTATTTTTGGTATATGATCTGGAATAATTGGATCTTCAATAAGTATTATTATTCGAATAGAATTAGGGAATCCCGGATTTTTAATTAATAATGACCAAATCTATAATTCTATTGTTACAGCTCATGCATTTATTATAATTTTTTTTATAGTTATACCAATTATAATTGGAGGATTTGGAAATTGATTAATCCCATTAATATTAGGTGCACCTGATATAGCATTTCCACGAATAAATAATATAAGATTCTGATTACTACCCCCATCTATCTTATTATTAATTTTAAGAAGAATTTTTAATCAAGGAGTAGGAACTGGGTGAACTGTTTATCCTCCTTTATCATTAAATTTAAATCATGAAGGATTATCTGTAGATTTAGCCATTTTTTC…
RRMFD017-15	BOLD:ACE5640	Diptera	Tabanidae	Chrysopsinae	Chrysops ater	AACTCTATATTTCATTTTCGGTTCGTGAGCTGGAATAGTAGGAACTTCCCTCAGCCTACTTATTCGAGCAGAACTTGGAAATCCAGGATCCTTGATTGGTGACGATCAAATTTACAACGTAATCGTAACTGCTCATGCTTTCATCATAATTTTCTTCATGGTTATACCTATCGTAATTGGTGGATTTGGAAATTGGCTTATCCCATTGATACTAGGAGCTCCAGATATGGCTTTCCCTCGAATAAACAACATAAGATTTTGGTTACTTCCACCCTCTCTCACTCTTTTGCTGATAAGAAGAATAGTTGAAAGAGGAGCAGGAACAGGTTGAACAGTATACCCTCCCTTATCTTCAAATATCGCTCATGGAGGAGCTTCTGTTGATTTAGCAATTTTTAG…
RRSSC1824-15	BOLD:AAI7911	Diptera	Sciomyzidae		Atrichomelina pubera	AACTTTATATTTCATTTTTGGAGCTTGATCAGGAATAGTTGGAACTTCTCTAAGAATTCTAATTCGAGCAGAATTAGGGCATCCGGGAGCATTAATCGGTGATGACCAAATTTATAATGTAATTGTTACAGCTCATGCTTTTATTATAATTTTCTTTATAGTAATGCCAATTATAATTGGAGGATTTGGTAATTGATTAGTACCAATTATACTTGGAGCTCCAGATATAGCCTTCCCTCGAATAAATAATATAAGATTCTGACTACTTCCTCCAGCATTAACACTTCTTCTAGTTAGTAGTATAGTAGAAAACGGAGCTGGAACAGGATGAACTGTTTATCCACCCTTATCTTCTAATATCGCTCATGGAGGAGCTTCTGTTGATTTAGCAATTTTCTC…
RRMFG2629-15	BOLD:AAE4413	Diptera	Bombyliidae	Anthracinae	Hemipenthes sinuosa	AACACTATATTTCATTTTTGGAGCTTGGGCAGGAATACTAGGAACTTCATTTAGTTTGTTAATTCGAGCAGAATTAGGAAGCCCAGGTTCACTCATTGGAAATGATCACATTTTTAATGTTATTGTAACAAGACATGCATTTATTATAATTTTCTTTATAGTGATACCTATCATAATTGGAGGTTTTGGTAACTGATTAGTACCCTTAATATTAGGAGCACCAGATATAGCATTTCCACGAATAAATAATATAAGATTCTGATTACTCCCTCCATCCCTATCTTTATTAATTATAAGAAGAATGATTGAAAGTGGGGCTGGAACAGGTTGGACAGTATATCCCCCTTTATCAGCAAATATTGCTCATAGAGGACCTTCAGTCGATCTGGCAATCTTTAG…
RRSSA4301-15	BOLD:ADJ4997	Diptera	Stratiomyidae	Beridinae	Allognosta fuscitarsis	AACTTTATATTTTATTTTCGGAGCATGAGCCGGAATAGTAGGAACTTCTTTAAGAATTCTTATTCGAGCTGAATTAGGTCACCCAGGAGCATTAATTGGAGATGATCAAATTTATAATGTAATTGTTACAGCTCATGCTTTTATTATAATTTTTTTTATAGTAATACCTATTATAATTGGAGGGTTTGGAAATTGACTGGTTCCTTTAATACTAGGAGCTCCTGATATAGCTTTCCCTCGAATAAATAATATAAGTTTTTGACTTTTACCTCCTGCATTAACTTTATTATTAGTAAGCAGTATAGTAGAAAACGGAGCTGGAACAGGATGAACTGTTTACCCACCCCTATCTTCAAATATTGCTCATGGGGGAGCTTCTGTTGATTTAGCAATTTTTTC…
RRGCO812-15	BOLD:AAA8586	Trichoptera	Hydropsychidae	Arctopsychinae	Parapsyche apicalis	AACTTTATATTTTATTTTTGGTATTTGAGCAGGCATAGTAGGAACTTCATTAAGATTACTAATTCGAGCAGAATTAGGAACCCCCGGATCTTTAATTGGAGATGACCAAATCTATAATACTATTGTTACAGCTCATGCTTTTATTATAATTTTTTTTATAGTTATACCTATTATAATTGGAGGATTTGGAAATTGATTAGTACCATTAATATTAGGAGCCCCAGATATAGCTTTCCCACGAATAAATAATATAAGTTTCTGACTTTTACCCCCCTCCCTTACTCTTTTAATTTCAAGAAGAATTGTAGAAAATGGAGCAGGAACTGGATGAACAGTTTATCCCCCACTTTCATCTAATATTGCCCATGGAGGAAGTTCAGTAGACTTAGCTATCTTTTC…
RRGCO269-15	BOLD:AAC3111	Lepidoptera	Erebidae	Hypenodinae	Dyspyralis nigellus	TACTTTATATTTCATCTTTGGAGCTTGATCAGGAATAATTGGAACTTCACTAAGAATCCTAATTCGAGCAGAACTAGGACACCCTGGAGCATTAATCGGAGATGACCAAATTTATAACGTAATTGTAACAGCTCATGCTTTTATTATGATTTTTTTTATAGTAATACCAATTATAATTGGTGGATTTGGTAATTGATTAGTTCCTCTTATATTAGGAGCCCCAGATATAGCTTTCCCCCGAATGAATAATATAAGTTTTTGACTACTACCTCCTGCATTAACCTTATTACTAGTAAGTAGTATAGTAGAAAACGGAGCTGGAACAGGATGAACTGTTTACCCCCCTCTATCATCTAATATTGCTCATGGAGGAGCATCAGTTGATCTAGCTATTTTCTC…
RRGCO336-15	BOLD:AAA6653	Lepidoptera	Geometridae	Ennominae	Cabera erythemaria	AACAATTTATTTTATTTTTGGAATTTGAGCTGGAATAGTGGGTACTTCACTAAGAATAATTATTCGAACAGAACTCGGAACATCTGAATCATTAATTAAAAACGATCAAATCTATAATGTTTTAGTAACAGCTCATGCTTTTATTATAATTTTTTTTATGGTTATACCAATTATAATTGGAGGATTTGGAAACTGATTAGTTCCTCTAATAATTGGAGCTCCTGATATAGCCTTCCCTCGTATAAATAATATAAGTTTTTGATTATTACCTCCCTCTTTAAATTTTCTTCTAATTAGATCTATTGTTGAAAATGGAACTGGAACTGGATGAACAGTTTATCCACCTCTTTCTGCGAATATTGCTCATGCTGGCAGATCAGTTGATATCTCAATTTTTTC…
RRMFG2303-15	BOLD:ABX5183	Coleoptera	Cantharidae	Cantharinae	Podabrus rugosulus	AACATTATATTTCATTTTTGGAGCATGAGCTGGCATACTAGGTACATCATTTAGATTACTGATTCGGGCAGAATTAGGAAACCCCGGGTCATTAATTGGAAATGATCATATTTTCAATGTAATTGTAACTAGTCACGCTTTTATTATAATTTTTTTCATAGTTATACCTATTATAATTGGGGGATTTGGAAATTGACTAGTTCCTTTAATATTAGGGGCACCTGATATAGCATTTCCCCGTATAAACAATATAAGATTCTGATTACTTCCTCCTTCCCTATCTCTATTAATTATAAGAAGTATAGTCGAAAGAGGGGCAGGAACAGGTTGAACTGTTTACCCTCCCCTTTCAGCTAACATTGCTCATAGAGGGCCCTCAGTAGATTTAGCAATTTTTAG…
RRMFE3112-15	BOLD:AAG1699	Diptera	Muscidae	Phaoniinae	Phaonia bysia	AACTTTATATTTTATTTTTGGAATTTGAAGAGGCATAATAGGAACATCTCTAAGATTATTAATTCGTACTGAATTAAGTACCCCTAGATCTTTAATTGGAGATGATCAAATTTATAATACTATTGTCACAGCTCATGCTTTTATTATAATTTTTTTTATAGTAATACCAATTATAATTGGAGGATTTGGTAATTGATTAATTCCTTTAATACTTGGAGCTCCAGATATAGCATTTCCCCGAATAAATAATATAAGTTTCTGACTTCTTCCACCTTCTTTAATTCTTTTAATTTCAAGAAGTATTGTAGAAAATGGAGCCGGAACAGGATGAACAATTTATCCCCCTCTTTCATCTAATATTGCTCACAGAGGCAGATCTGTAGATTTAACTATTTTTTC…
RRGCO709-15	BOLD:AAD7889	Lepidoptera	Crambidae	Pyraustinae	Sitochroa palealis	AACTTTATATTTTATTTTTGGAATTTGATCTGGTATAGTAGGAACCTCTCTTAGTTTATTAATTCGAGCAGAATTAGGTAACCCTGGATCTTTAATTGGAGATGATCAAATTTATAATACTATTGTAACAGCTCATGCTTTTATTATAATTTTTTTTATAGTTATACCAATTATAATTGGAGGATTTGGAAATTGACTTATTCCTTTAATATTAGGAGCCCCTGATATGGCTTTTCCACGAATAAATAATATAAGATTTTGATTATTACCCCCCTCCTTAACTTTATTAATCTCAAGAAGAATTGTAGAAACTGGAGCTGGAACTGGATGAACAGTATATCCCCCTTTATCATCAAATATTGCTCATGGTGGAAGTTCAGTAGATCTAGCAATTTTTTC…
RRMFG2721-15	BOLD:AAA9461	Hymenoptera	Formicidae	Formicinae	Camponotus pennsylvanicus	TACTTTATATTTCTTATTCGGAATTTGGGCTGGAATAGTAGGAACTTCTTTAAGTTTATTAATTCGTGCAGAATTAGGTCATCCTGGTGCATTAATTGGTGATGATCAAATTTATAATGTTATTGTTACTGCTCATGCCTTTGTTATAATTTTCTTTATAGTAATACCAATTATAATTGGAGGTTTTGGTAATTGATTAGTTCCTTTAATATTAGGAGCTCCAGATATAGCATTTCCTCGAATAAATAATATAAGTTTTTGACTTTTACCACCTTCTTTAACTTTACTTTTAGTAAGAAGAATAGTAGAAAATGGAGCTGGAACCGGATGAACTGTTTACCCTCCTCTTTCTTCTGTAATTGCACATGGAGGTGCTTCAGTAGATTTAGCAATTTTTTC…
RRSSC1967-15	BOLD:AAH7158	Diptera	Sarcophagidae	Sarcophaginae	Ravinia stimulans	AACCTTATATTTCATTTTCGGTGCATGATCAGGAATAGTAGGAACTTCCCTCAGTCTACTAATTCGAGCCGAACTTGGAAACCCCGGAACCTTGATTGGCGATGATCAAATTTACAATGTAATCGTCACAGCTCATGCATTTGTTATAATTTTCTTCATAGTAATACCCATTGTAATTGGGGGATTTGGAAATTGATTAGTTCCGTTGATACTTGGAGCACCTGACATAGCTTTCCCTCGGATAAATAACATAAGATTTTGGTTATTGCCTCCTTCTCTTACCCTCCTTTTAATGAGAAGAATAGCTGAAAGAGGGGCTGGAACTGGATGAACTGTTTATCCACCTCTTTCAGCTAATGTAGCCCACAGAGGAGCTTCTGTTGATTTAGCCATTTTCAG…
RRGCO747-15	BOLD:AAA5690	Lepidoptera	Geometridae	Geometrinae	Synchlora frondaria	TATTTTATATTTTTTATTTGCTTTATGAGCTGGTATATTAGGAACATCTTTGAGAATAATTATTCGAATAGAGTTAGGAATAGCTGGTCAGTTAATTGGTAATGATCAAATTTATAATTCAATTGTTACTGCTCATGCTTTTGTTATAATTTTTTTTATAGTGATACCTTTTATAATTGGTGGATTTGGAAATTGGTTAGTTCCTTTAATATTAGGGGCTCCAGATATGGCTTTTCCCCGTATAAATAATATAAGATTTTGATTATTGCCTCCTTCTATTATTATATTATTATTAAGAAGATTTATAGATACTGGGGTTGGAACAGGTTGAACTGTTTATCCTCCTTTATCTTCAAATGCAGGTCATATGGGAATATCTGTAGATTTAGCTATTTTTTC…
RRMFC2036-15	BOLD:AAP4830	Diptera	Tachinidae	Exoristinae	Phorocera slossonae	AACATTATATTTTATTTTTGGTGCTTGATCTGGTATAGTAGGGACATCTTTAAGTATTTTAATTCGAGCTGAATTGGGTCATCCTGGAGCTTTAATTGGTGATGATCAAATTTATAATGTAATTGTTACAGCTCATGCTTTTATTATAATTTTTTTTATAGTAATGCCTATTATAATTGGTGGATTTGGTAATTGATTAGTACCTCTAATATTAGGAGCTCCTGATATAGCATTCCCTCGAATAAATAATATAAGATTTTGATTATTACCTCCAGCTTTAACTTTATTACTAGTAAGAAGTATAGTAGAAAATGGAGCTGGTACTGGTTGAACTGTTTACCCTCCACTTTCATCTAACATTGCTCATAGAGGAGCTTCAGTTGATTTAGCAATTTTCTC…
RRMPE002-15	BOLD:AAH3305	Coleoptera	Coccinellidae	Coccinellinae	Hippodamia glacialis	AACTTTATATTTTATTTTTGGAGCATGAGCAGGAATAGTAGGAACATCCCTCAGAGTTTTAATTCGATCAGAATTAGGTAATCCAGGATCATTAATTGGAGATGATCAAATTTATAATGTTATTGTCACAGCCCATGCATTTATTATAATTTTTTTCATAGTTATACCTATTATAATTGGAGGATTCGGAAATTGACTTGTACCCTTAATACTGGGGGCCCCCGACATGGCATTTCCTCGAATAAACAATATAAGATTCTGATTATTACCCCCCTCTTTAACTCTTCTAATTATAAGAAGAATTGTAGAAAGAGGAGCTGGTACAGGATGAACTGTTTATCCCCCTCTTTCAGCTAATGTAGCTCATAGAGGATCTTCTGTAGATTTAGCTATTTTTAG…
RRMFE3000-15	BOLD:AAA3933	Lepidoptera	Erebidae	Herminiinae	Palthis angulalis	AACTTTATATTTTATTTTAGGAGCTTGGGCAGGAATAGTAGGAACTTCATTAAGAATTTTAATTCGAGCAGAACTTGGTCATCCGGGAGCTTTAATTGGGGATGACCAAATTTATAATGTTATTGTAACAGCTCATGCATTTGTAATAATTTTCTTTATAGTAATACCTATTATAATTGGGGGATTTGGAAATTGATTAGTTCCATTAATACTTGGGGCTCCTGATATAGCCTTTCCCCGAATAAATAATATAAGTTTTTGGTTATTACCTCCTTCACTTACTCTTTTATTGGCAAGTAGTATAGTAGAAAATGGGGCTGGAACTGGATGAACAGTTTACCCCCCTCTTTCTGCTGGTCTTGCTCACACAGGAGCTTCAGTTGATTTAGCAATTTTTTC…
RRMPG975-15	BOLD:AAD8276	Diptera	Syrphidae	Syrphinae	Allograpta obliqua	AACTCTTTATTTTATTTTTGGAATTTGAGCAGGAATAATTGGATCTTCTTTAAGAATTATAATTCGAGCTGAATTAGGGAACCCAGGATCATTAATTGGAGATGATCAAATTTATAATACAATTGTAACAGCTCATGCATTTATTATAATTTTTTTTATAGTAATACCTATTATAATTGGAGGATTTGGAAATTGACTTGTTCCTTTAATACTTGGAGCCCCAGATATAGCTTTCCCACGTCTTAATAATATAAGATTTTGATTATTACCCCCTTCTATTTTACTATTAATCTCGAGAAGAATTGTAGAAAATGGAGCAGGTACGGGATGAACTGTTTATCCTCCTTTATCTTCTAATATTGCTCATGGTGGAAGTTCTGTAGATCTTGCTATTTTTTC…
RRMFG2353-15	BOLD:AAA2078	Lepidoptera	Geometridae	Ennominae	Campaea perlata	AACTATTTATTTTATCTTCGGAATTTGAGCAGGAATAATTGGAACTTCATTAAGAATAATTATTCGAACTGAACTCGGCACTACTGAATCATTAATTAAAAATGACCAAATTTATAACGTATTAGTAACAGCCCATGCTTTCATTATAATTTTCTTTATAGTAATACCAATTATAATTGGAGGATTTGGCAACTGACTTGTACCCCTCATAATTGGAGCACCTGATATAGCTTTCCCACGTATAAATAACATAAGATTTTGACTTCTGCCCCCATCCCTGAATCTTCTTTTAATTAGAGCCCTAATTGAAAGAGGAACAGGAACTGGTTGAACTGTATACCCGCCCCTTTCCAGTAACCTAGCCCATGCAGGAAGATCAGTTGATATCTCTATTTTCTC…
RRSSC7820-15	BOLD:ACV2215	Diptera	Pediciidae	Pediciinae	Tricyphona	AACATTGTATTTTATATTCGGGATATGGGCAGGAATAATTGGATCATCTCTTAGATGAATTATTCGTATAGAATTAGGTCAAATAGGAACACTTATTGGAGATGATCAAATTTATAATGTAATTGTAACAGCCCACGCCTTTATTATAATTTTCTTTATAGTTATACCTATTATAATTGGGGGATTTGGCAATTGACTAATTCCTTTAATAATTGGAGCACCAGATATAGCATTTCCCCGACTTAATAATATAAGTTTTTGACTTCTACCCCCATCTCTTTCTTTATTATTTATAAGCAGACTTAGAGAATCAGGAGCAGGAACAGGATGAACAGTTTATCCACCTCTGTCAAATAGACTATTTCATAGAGGAGCTCCTGTAGACCTAGCAATTTTTTC…
RRMFE2992-15	BOLD:AAA6926	Lepidoptera	Geometridae	Larentiinae	Trichodezia albovittata	AATTTTATATTTTATTTTTGGAATATGAGCAGGTATAATTGGATCATCAATAAGAATAATTATTCGATTAGAATTAGGTAACCCTGGTTACTTTATTAATAATGACCAAATTTATAATTCTATAGTTACTTCCCATGCTTTTATTATAATTTTCTTTATAGTTATACCTATTATAATTGGAGGATTTGGTAATTGATTAATCCCCCTAATACTTGGGGCCCCTGATATAGCATTCCCACGAATAAATAATATAAGATTTTGACTTTTACCCCCATCCTTAACTTTATTAATTCTTAGTAATTTAATAAATCAAGGAGTTGGAACAGGCTGAACAGTTTACCCCCCCCTTTCCTTAAATATAAGTCATGAAGGAATAGCAGTTGATCATTCAATTTTTTC…
RRSSA4469-15	BOLD:AAF9772	Diptera	Hybotidae	Tachydromiinae	Platypalpus	AATATTATATTTTATTTTTGGATTATGAAGAGGAATAATTGGATCCTCATTAAGAATAATTATTCGATTAGAATTAGGTATACCAGGAAAATTAATTGGTAATGATCAAATTTATAATACTATTGTTACCTCTCACGCTTTTATTATAATTTTTTTTATAGTAATACCATTCATAATTGGAGGATTTGGAAATTGATTAGTTCCTCTAATAATTTCAGCACCTGATATAGCATTTCCTCGAATAAATAATATAAGTTTTTGATTATTACCCCCATCTTTATTTTTACTATTATTAAGAAATTTTATTGGTAATGGTGTTGGAACAGGTTGAACTCTATATCCACCCCTATCTTCTATTACAGGTCATAATTCTCCTTCTGTAGATATTGGAATTTTTTC…
RRMFE2528-15	BOLD:ABX8463	Diptera	Tachinidae	Tachininae	Panzeria arcuata	GACCCTATATTTTATATTTGGTATTTGAGCTGGAATACTTGGAACATCCCTTAGATGACTAATTCGTATTGAACTAGGACACCCTGGATCTTTTATTGGGGACGATCAAATTTATAATGTAGTTGTTACTGCACATGCTTTTATTATAATCTTCTTTATGGTTATACCCATTATAATTGGAGGATTTGGTAACTGACTAGTGCCATTAATAATTGGGGCACCAGATATAGCATTCCCTCGTATAAATAATATAAGTTTCTGACTACTACCCCCTTCAATTACATTATTAATTGTAAGAAGAATTGTAGAAAAGGGTGTAGGAACAGGATGAACAGTTTATCCTCCTCTATCAGCTAACGTAGCCCATAATGGTGCATCAGTAGATCTAGCCATTTTCAG…
RRMFI4058-15	BOLD:AAA4972	Lepidoptera	Noctuidae	Eustrotiinae	Maliattha synochitis	AACATTATATTTTATTTTTGGAGCATGAGCTGGAATAATTGGTACTTCATTAAGTATCTTAATTCGAGCTGAATTAGGACACCCTGGATCATTAATTGGGGATGACCAAATTTATAATGTAATTGTAACAGCACATGCTTTTGTAATAATTTTCTTTATAGTAATACCTATTATAATTGGAGGGTTTGGAAATTGATTAGTTCCTTTAATACTAGGAGCTCCTGATATAGCATTCCCTCGAATAAATAATATAAGTTTCTGATTATTACCACCATCATTAACTCTTTTATTAGCCAGTAGTATAGTAGAAAATGGAGCTGGAACTGGTTGAACAGTATACCCACCTCTATCTGCTGCAATTGCTCATGGAGGAGGATCAGTTGATTTAGCAATTTTTTC…
RRMPC926-15	BOLD:AAH3037	Diptera	Calliphoridae	Chrysomyinae	Protocalliphora	AACATTATATTTTTTATTTGGAACTTGAGCAGGTATAGTAGGAACCTCTTTAAGTGTATTAATTCGTGCAGAACTTGGACATCCAGGTGCTTTAATTGGAGATGACCAAATTTATAATGTTATTGTAACTGCACATGCTTTTGTAATAATTTTTTTTATAGTAATACCAATTATAATTGGAGGATTTGGAAATTGATTAGTTCCTTTAATATTAGGAGCTCCTGATATAGCATTTCCTCGAATAAATAATATAAGTTTTTGATTATTACCTCCTTCTTTAACACTTTTATTAGTAAGAAGAATAGTTGAAAACGGAGCTGGAACAGGTTGAACAGTTTACCCTCCTCTTTCTGCTAGTATTGCACATGGAGGAGCTTCTGTTGATTTAGCTATTTTTTC…
RRMFG2651-15	BOLD:ABA8856	Diptera	Tipulidae	Tipulinae	Ctenophora dorsalis	AATTCTTTATTTTATATTTGGTATTTGGTCAGGAATAATTGGAATAATAATAAGAATTATTATTCGAATTGAACTTGGTCAACCAGGATCACTAATTAATAATGATCAATTATATAATGTTATTGTAACGTCACATGCTTTTATTATAATTTTCTTTATAGTTATACCAATTATAATTGGAGGATTTGGTAATTGATTATTACCATTAATAATTGGGGCTCCAGATATAGCATTCCCTCGATTAAATAATATAAGATTCTGAATACTACCACCATCTTTAACGTTATTATTGTCAAGATCATTAATTGAAATAGGTGTAGGAACAGGTTGAACTGTCTACCCTCCATTATCTTCTAATATTGCACATTCAGGTCCTAGAGTAGATATATCTATTTTTTC…
RRSSA4405-15	BOLD:AAG1484	Hemiptera	Membracidae	Smiliinae	Smilia camelus	AACATTATATTTCATCTTTGGAGCCTGAGCAGGTATAGTAGGAACTTCACTCAGTCTATTAATTCGAGCAGAACTTGGTCAACCAGGTTATCTAATTGGCGACGATCAAATTTATAATGTTATTGTCACTGCTCACGCATTCGTAATAATTTTCTTTATAGTTATACCTATTATAATTGGAGGATTCGGAAATTGACTTGTCCCTTTGATATTAGGGGCTCCAGATATAGCTTTCCCTCGAATAAATAATATAAGATTTTGATTATTACCCCCCTCATTAACCCTTCTTCTTAGAAGAAGTCTTGTGGAAAGTGGTGCTGGTACAGGATGAACGGTTTACCCTCCTCTTTCTTCAGGTATCGCTCATGCAGGTGCTTCAGTTGATCTGGCTATTTTTTC…
RRMFG2623-15	BOLD:ADF2969	Diptera	Sarcophagidae	Sarcophaginae	Blaesoxipha falciformis	AACTCTTTATTTTATTTTTGGAGCCTGAGCAGGCATAGTAGGAACTTCATTAAGAATCCTTGTGCGAGCAGAATTAGGTCACCCAGGGTCATTAATTGGAGATGATCAAATCTATAATGTAATTGTAACAGCTCATGCTTTTATTATAATTTTCTTTATAGTAATACCAATTATAATTGGAGGATTCGGAAATTGACTTGTACCTTTAATATTAGGTGCTCCTGATATAGCTTTCCCCCGAATAAATAATATAAGATTCTGAATATTACCTCCATCCCTTACTCTACTGTTAGCAAGTTCAATAGTTGAAAGTGGAGCAGGAACCGGATGAACTGTATATCCACCATTATCTTCAAGTATCGCCCATGGAGGTGCCTCAGTTGATCTAGCTATTTTCTC…
RRGCO618-15	BOLD:AAA3371	Lepidoptera	Geometridae	Larentiinae	Epirrhoe alternata	AACTTTATATTTTATTTTTGGAATTTGAGCTGGAATAGTAGGAACTTCATTAAGATTATTAATTCGAGCAGAATTAGGAAATCCTGGATCACTAATCGGAGATGACCAAATTTACAATACTATTGTAACAGCCCATGCATTTATCATAATTTTTTTTATAGTAATACCAATTATAATTGGGGGATTTGGAAATTGATTAGTACCTTTAATACTCGGGGCCCCTGATATAGCATTCCCACGAATAAATAATATAAGATTTTGACTTTTACCTCCTTCTATTACTCTTTTAATTTCTAGAAGAATCGTAGAAAATGGGGCTGGAACTGGATGAACAGTTTACCCACCTTTATCATCTAATATTGCTCATGGGGGTAGATCAGTAGATTTAGCTATTTTTTC…
RRGCO081-15	BOLD:ACE7444	Hemiptera	Miridae	Mirinae	Adelphocoris lineolatus	AACACTTTACTTTATTTTTGGGGCTTGAGCTGGAATAATTGGAACATCATTAAGTATTTTAATTCGTGCTGAATTAGGTCATCCAGGTGCTTTAATTGGTGATGATCAAATTTATAATGTAATTGTAACTGCTCATGCATTTGTTATAATTTTCTTTATAGTTATACCTATTATAATTGGGGGATTCGGAAATTGACTTGTTCCATTAATGTTAGGAGCTCCTGACATAGCATTCCCTCGAATAAATAATATAAGTTTTTGACTACTTCCTCCTTCATTAACACTTTTATTAGTTAGAAGTATAGTTGAAAATGGGGCTGGAACTGGTTGAACTGTATACCCACCATTATCTGCAGCTATTGCTCATGGAGGAGGATCAGTTGATTTAGCAATTTTTTC…
RRMFG2646-15	BOLD:AAG1715	Diptera	Muscidae	Mydaeinae	Mydaea detrita	AACTTTATATTTTATTTTTGGAGCTTGAGCTGGAATAGTGGGGACCTCCTTAAGAATTTTGATTCGAGCTGAATTAGGACATCCTGGAGCTTTAATTGGAAATGATCAAATTTATAACGTTATTGTAACAGCCCATGCTTTTATTATAATTTTTTTTATAGTTATACCTATTATAATTGGAGGATTTGGTAATTGACTTGTCCCTTTAATATTAGGAAGACCTGATATAGCTTTTCCTCGAATAAATAATATAAGTTTCTGAATACTACCCCCATCCTTAACCCTTTTATTAGCTAGAAGCATAGTTGAAAATGGAGCAGGGACAGGATGAACAGTATATCCCCCCCTATCTTCCGGAATTGCTCATGCTGGGGCTTCAGTAGACTTAGCTATTTTTTC…
RRSSC1828-15	BOLD:ACX1290	Diptera	Chloropidae		Chloropidae	AACTTTATATTTTATCTTTGGGGCCTGAGCAGGTATAGTAGGAACTTCTTTAAGAATTCTTATTCGAGCTGAACTAGGTCATCCAGGAGCTTTAATTGGGGACGATCAAATTTATAACGTAATTGTTACAGCTCACGCTTTCATTATAATTTTTTTTATGGTTATACCCATCATAATTGGAGGATTTGGAAATTGACTAGTCCCTATTATACTAGGAGCCCCTGATATAGCATTTCCCCGAATAAACAATATAAGATTTTGATTGCTTCCCCCAGCATTAACTTTACTATTGGTAAGTAGTATAGTAGAAAATGGAGCTGGAACAGGTTGAACTGTTTACCCCCCCCTATCCTCTAACATTGCTCATGGAGGAGCCTCAGTAGATTTAGCAATTTTCTC…
RRGCO126-15	BOLD:AAB3571	Lepidoptera	Tortricidae	Tortricinae	Cochylis hoffmanana	AACATTATATTTTATTTTTGGAATTTGAGCAGGAATAGTTGGAACTTCTCTAAGATTATTAATTCGAGCTGAATTAGGTAACCCAGGATCATTAATTGGAGATGATCAAATTTATAATACTATTGTTACAGCTCATGCTTTTATTATAATTTTTTTTATAGTTATACCTATTATAATTGGAGGATTTGGAAATTGATTAGTACCTTTAATATTAGGAGCACCAGATATAGCTTTTCCACGAATAAATAATATAAGTTTTTGATTATTACCCCCCTCCCTTACTCTTTTAATTTCAAGAAGAATTGTAGAAAATGGAGCAGGAACAGGATGAACAGTTTACCCCCCACTTTCATCTAATATTGCTCATGGAGGTAGATCAGTAGATTTAGCAATTTTTTC…
RRSSC243-15	BOLD:AAD6367	Hymenoptera	Vespidae	Eumeninae	Euodynerus foraminatus	AACATTATATTTTATTTTTGGAACTTGATCAGGGATAGTGGGAACTTCATTAAGAATCTTAATTCGAGCAGAATTAGGAAATCCCGGTTCTTTAATTGGAGATGATCAAATCTACAATGTAATTGTAACTGCTCATGCTTTTATTATAATTTTTTTTATAGTTATACCTATAATAATTGGGGGATTTGGTAATTGACTAGTACCTCTTATATTAGGAGCACCAGATATAGCTTTTCCACGCCTTAATAATATAAGATTCTGACTACTCCCTCCTTCTCTATCATTCCTATTAATAAGAAGAATTGTAGATAAAGGGGCCGGCACAGGTTGGACTGTATATCCCCCCCTATCAGCCAATATTGCCCATGAAGGCTCTTCAGTAGATTTAGCTATCTTCAG…
RRGCO234-15	BOLD:ACE8254	Lepidoptera	Geometridae	Larentiinae	Dyspteris abortivaria	AACATTATACTTTATTTTTGGAATTTGAGCAGGTATAGTAGGAACTTCATTAAGATTACTAATTCGAGCTGAATTAGGAAATCCTGGTTCTTTAATTGGAGACGATCAAATTTACAATACTATCGTAACAGCTCATGCTTTTATTATAATTTTTTTTATAGTTATACCCATTATAATTGGGGGATTTGGAAATTGATTAGTTCCTTTAATATTAGGAGCTCCTGATATAGCATTTCCTCGAATAAATAATATAAGATTTTGACTTTTACCTCCTTCTCTAACTCTTTTAATTTCAAGAAGAATTGTAGAAAATGGAGCAGGAACTGGATGAACTGTTTACCCTCCTTTATCTTCTAATATTGCTCATGGAGGAAGTTCAGTAGATTTAGCAATTTTCTC…
RRSSC7832-15	BOLD:ACL8650	Diptera	Limoniidae	Limnophilinae	Epiphragma fasciapenne	AACTTTGTATTTTATTTTAGGAGCTTGGGCAGGAATAGTAGGAACTTCTTTAAGAATTTTAATTCGAGCAGAACTTGGTCATCCGGGGGCCTTAATTGGGGATGACCAAATTTATAATGTTATTGTAACAGCTCATGCATTTGTAATAATTTTTTTTATAGTAATACCTATTATAATTGGAGGATTTGGAAATTGATTAGTTCCTTTAATATTAGGGGCTCCTGATATAGCCTTTCCTCGAATAAATAATATAAGTTTTTGATTATTACCACCTTCTCTTACACTTTTATTAGCAAGTAGTATAGTTGAAAATGGAGCAGGGACTGGTTGAACAGTATACCCCCCCCTTTCTGCTGGAATTGCCCATACTGGAGCATCAGTTGATTTAGCAATTTTTTC…
RRSSC3243-15	BOLD:AAE1308	Hemiptera	Pentatomidae	Pentatominae	Neottiglossa undata	TACTTTATATTTTATTTTCGGAGCATGATCAGGAATAGTAGGTACCTCTTTAAGAATATTAGTTCGAGCAGAATTAGGGCATCCTGGAGCATTAATCGGTGATGATCAAATTTATAATGTAATTGTAACAGCCCATGCCTTTGTTATAATTTTTTTTATAGTTATACCTATTATAATTGGAGGATTTGGAAATTGACTTGTTCCTTTAATATTAGGAGCACCTGATATAGCATTCCCTCGAATGAATAATATAAGTTTTTGACTCTTACCTCCTGCACTTACATTATTATTGGTGAGCAGTATAGTGGAAAACGGAGCTGGGACAGGATGAACTGTTTACCCACCTCTATCTTCTAATATTGCTCATGGAGGGGCTTCTGTTGATTTAGCTATTTTTTC…
RRGCO774-15	BOLD:AAH7074	Trichoptera	Limnephilidae	Limnephilinae	Pycnopsyche scabripennis	TACATTATATTTTATTTTTGGAATTTGAGCAGGTATAGTAGGAACATCATTAAGATTACTAATTCGAGCTGAATTAGGAAATCCAGGATCATTAATTGGAGATGATCAAATTTATAATACTATTGTTACAGCTCATGCTTTTATTATAATTTTTTTTATAGTTATACCTATTATAATCGGAGGATTTGGAAATTGATTAGTTCCTTTAATATTAGGAGCACCTGATATAGCTTTCCCACGTATAAATAATATAAGATTTTGACTTCTTCCACCCTCTATTATATTATTAATTTCAAGAAGAATCGTAGAAAATGGAGCAGGTACAGGATGAACAGTATACCCCCCACTTTCATCTAATATCGCTCATAGAGGAAGATCAGTAGATTTAGCTATTTTTTC…
RRSSA2341-15	BOLD:AAH0357	Coleoptera	Carabidae	Harpalinae	Chlaenius	AACCTTATATTTTATTTTTGGAATTTGAGCAGGATTAGTAGGAACCTCTCTCAGTCTATTAATTCGAGCAGAATTAGGTAATCCAGGATCTTTAATTGGAGATGATCAAATTTATAATACTATTGTAACAGCTCATGCTTTCATTATAATTTTTTTTATAGTTATACCAATTATAATTGGAGGATTTGGTAATTGATTAATTCCTTTAATATTAGGAGCCCCCGATATAGCTTTCCCCCGAATAAATAACATAAGATTCTGACTACTTCCCCCCTCTATTATACTGTTAATTTCAAGAACAATCGTCGAAAATGGAGCTGGAACTGGTTGAACTGTATACCCTCCTTTATCATCTAATATTGCACACAGAGGAACTTCAGTTGATTTAACTATTTTTTC…
RRMPE019-15	BOLD:ABU8852	Hymenoptera	Tenthredinidae	Tenthredininae	Macrophya flavolineata	GACTCTATATTTTATTTTTGGTGCATGAGCTGGAATAGTAGGAACTTCATTAAGTCTACTAATTCGGTCAGAACTAGGTACACCTGGAACATTAATTGGTAATGACCAAATTTATAATGTTATTGTTACTGCTCATGCTTTTATCATAATTTTCTTTATAGTTATACCAATTATAATTGGGGGATTTGGAAATTGATTAGTACCCTTAATATTAGGAGCACCCGATATAGCATTTCCACGAATAAATAATATAAGATTTTGACTTTTACCCCCGTCTCTATCTTTACTTTTAATAAGAAGGATAGTAGAAAGAGGAGCAGGAACAGGGTGGACTGTTTATCCCCCTTTATCTTCAAATATTGCCCATGGGGGTTCTTCTGTTGATTTGGCAATTTTTAG…
RRSSC1988-15	BOLD:AAC1312	Diptera	Syrphidae	Syrphinae	Toxomerus geminatus	AACCCTTTACTTCCTTTTTGGAGCCTGAGCAGGAATGCTTGGAACTTCATTAAGACTACTAATCCGAGCAGAACTAGGAAACCCTGGATCTCTAATTGGAAATGATCAAATTTACAATGTTATTGTCACAGCTCATGCTTTCATTATAATTTTCTTTATAGTAATGCCTATTATAATTGGAGGATTCGGAAACTGACTAGTCCCCCTTATACTAGGAGCACCAGATATAGCCTTCCCTCGAATAAACAACATAAGATTCTGGTTCTTACCACCATCACTATCACTTCTTCTAATAAGAAGAATCGTAGAAAACGGAGCAGGAACTGGATGAACCGTCTACCCACCCTTATCAGCCAATATTGCCCATAGAGGATCATCTGTCGATCTAGCTATTTTCAG…
RRMFC2068-15	BOLD:AAC8595	Diptera	Heleomyzidae	Suilliinae	Suillia quinquepunctata	AACGTTGTATTTTTTATTTGGAATCTGAGCCGGTATATTAGGAACATCTTTAAGATTATTAATTCGTGCTGAATTAGGAAATCCTGGTTCATTAATTGGAGATGACCAAATTTATAACACAATTGTAACTGCCCATGCTTTTATTATAATTTTTTTTATAGTTATACCAATTGTTATTGGGGGATTTGGTAATTGATTAATTCCTTTAATGTTAGGAGCCCCTGATATAGCTTTCCCTCGAATAAATAACATAAGATTCTGATTACTACCCCCTTCATTAACTCTTTTAATTTCAAGAAGAATTGTTGAAAATGGAGCAGGAACTGGATGAACAGTTTACCCCCCACTTTCATCTAATATTGCCCATAGAGGAAGATCAGTCGATTTAGCTATTTTTTC…
RRMFE3090-15	BOLD:ABV0388	Diptera	Bombyliidae	Bombyliinae	Bombylius major	AACTCTGTACTTTATCTTTGGCGCATGGGCAGGTATACTAGGTACATCCCTAAGACTTTTAATTCGTGCCGAACTAGGAAATCCAGGATCTCTAATTGGTAACGATCAAATTTACAACGTTATTGTTACTGCACACGCATTCATTATAATTTTCTTCATAGTTATACCAATCATAATCGGAGGATTTGGAAATTGATTAGTCCCATTAATGCTAGGAGCCCCAGACATAGCTTTCCCCCGAATAAACAACATAAGATTCTGACTCTTACCACCCTCATTAAGACTTCTACTAATAAGAAGAATTGTAGAAAATGGAGCAGGAACAGGATGAACTGTTTACCCACCACTATCATCCAATATTGCTCATAGAGGTTCCTCAGTAGACCTTGCTATTTTTAG…
RRMFI4245-15	BOLD:AAD1879	Hymenoptera	Ichneumonidae	Diplazontinae	Diplazon	AACTTTATATTTTATTTTTGGTGCCTGATCCGGAATAGTGGGAACTTCTTTAAGAATACTTATTCGAGCCGAATTAGGAAATCCAGGTTCTTTAATTGGAGACGACCAAATTTATAACGTAATTGTAACTGCTCATGCATTTATTATAATTTTCTTTATAGTAATACCAATTATAATCGGAGGATTCGGAAATTGATTAGTCCCTCTTATATTAGGAGCACCTGATATAGCATTTCCACGATTAAATAATATAAGATTTTGATTATTGCCTCCTTCTTTGTCCCTCCTTTTAATAAGAAGAATTGTTGACAAAGGAGCTGGAACTGGTTGAACTGTTTATCCCCCCTTATCGGCCAATATTGCACATGAAGGATCTTCAGTAGATTTAGCAATTTTTAG…
RRSSC5038-15	BOLD:AAP7640	Diptera	Stratiomyidae	Beridinae	Actina viridis	AACTCTTTACTTTGTATTTGGGGCTTGAGCTAGGATAGTCGGAACATCTTTAAGGCTTTTAATTCGATCAGAATTAGGAAACCCTGGTTCATTAATTGGTGATGATCAAATTTATAATGTAATTGTGACTGCTCATGCATTTGTCATAATTTTCTTCATAGTTATACCCATTATAATCGGCGGATTTGGCAATTGACTAGTACCTTTAATATTGGGGGCACCTGATATAGCTTTCCCTCGAATAAATAACATAAGATTTTGATTGCTGCCACCTTCACTAACTTTGCTGATTATGAGAAGAGTTGTAGAAAGAGGGGCAGGAACAGGGTGAACTGTCTACCCCCCCCTTTCATCTAATATTGCCCACGGAGGATCTTCTGTTGATCTGGCAATCTTCAG…
RRSSA2295-15	BOLD:AAP8585	Coleoptera	Nitidulidae	Cryptarchinae	Glischrochilus sanguinolentus	TACTTTATATTTTATCTTTGGAGCTTGAGCAGGAATATTGGGAACTTCTTTAAGAATACTAATTCGAGCAGAATTAGGACATCCAGGATCTTTATTAGGTAATGATCAAATTTATAATGTAATTGTAACTGCACATGCTTTCATTATAATTTTTTTTATAGTAATACCTATTATAATTGGAGGATTCGGAAATTGATTGGTTCCTTTAATATTAGGAGCTCCTGATATAGCTTTTCCTCGAATAAATAATATAAGATTTTGAATACTGCCACCTTCATTAACTTTATTATTAATAAGAAGAATAGTTGAAAATGGAGCAGGAACAGGATGAACTGTTTACCCTCCCTTATCAAGAACTTTATCTCATAGAGGAGGATCTGTTGATTTAGCAATTTTTTC…
RRMFE2990-15	BOLD:AAA4097	Lepidoptera	Noctuidae	Noctuinae	Euplexia benesimilis	TACTTTATATTTTATTTTCGGAGCTTGATCTGGAATAATTGGAACTTCATTAAGAATTCTAATTCGAGCTGAACTAGGGCACCCTGGAGCTCTAATTGGAGATGACCAAATTTATAACGTAATTGTAACAGCTCATGCTTTTATTATAATTTTCTTTATAGTTATACCAATTATAATTGGAGGATTTGGAAATTGATTAGTTCCTTTAATATTAGGGGCTCCTGATATAGCTTTCCCACGAATAAACAATATAAGTTTTTGACTTTTACCTCCTGCATTAACTCTATTGTTAGTTAGTAGTATAGTAGAAAATGGGGCTGGAACAGGATGAACTGTTTACCCACCTTTATCATCTAATATTGCTCATGGAGGAGCATCTGTTGATCTAGCTATTTTCTC…
RRSSA3893-15	BOLD:AAH3314	Coleoptera	Coccinellidae	Coccinellinae	Myzia	AACTCTATATTTTATGTTCGGAGCATGAGCCCGAATAGTAGGAACTTCTTTGAGAATTCTTGTTCGAGCCGAATTAGGACATCCTGGGGCATTGATTGGAGATGATCAAATTTATAACGTAATTGTTACTGCCCATGCATTTGTAATAATTTTTTTTATGGTTATACCTATTATAATTGGAGGATTTGGTAACTGATTGGTTCCTTTAATGCTTGGAGCCCCAGATATGGCATTTCCACGAATAAATAATATAAGATTTTGACTACTACCTCCTTCATTAACACTATTACTAGTAAGTAGAATAGTGGAAAACGGAGCTGGGACAGGTTGAACGGTATACCCCCCTCTTTCATCTGTAATTGCACATGGAGGAGCATCTGTAGATTTAGTAATTTTTTC…
RRGCO351-15	BOLD:AAB6609	Lepidoptera	Crambidae	Pyraustinae	Fumibotys fumalis	AACTATTTATTTTATTTTTGGTATCTGAGCTGGAATAGTTGGTACTTCTCTAAGTATAATTATTCGAACTGAACTTGGAACTACTGAATCATTAATTAAAAACGATCAAATTTATAATGTTTTAGTTACTGCTCATGCTTTTATTATAATTTTCTTCATAGTTATACCCATCATAATTGGGGGATTTGGAAATTGACTTGTTCCCTTAATAATCGGAGCCCCTGATATAGCCTTCCCTCGAATAAATAATATAAGTTTTTGACTTCTTCCCCCTTCTCTAAATTTTCTATTAATTAGCTCAATTGTTGAGAATGGAACTGGAACAGGATGAACTGTCTATCCCCCCCTTTCAAGTAATATTGCTCATGCTGGAAGATCAGTTGATATCTCTATTTTCTC…
RRGCO298-15	BOLD:AAA4893	Lepidoptera	Crambidae	Crambinae	Microcrambus elegans	AATATTATATTTCTTATTTGCTATATGAGCAGGAATAATTGGAACATCAATAAGAATAATTATTCGAATAGAATTAAGAACACCAGGTATATGAATTAATAATGACCAAATTTATAATACAATAATTACCGCCCACGCATTTATTATAATTTTTTTTATAGTTATACCTTTCATAATTGGAGGATTTGGTAATTGACTAATCCCTATTATAATTGGAGCTCCCGATATAGCTTTCCCACGAATAAACAATATAAGATTTTGATTATTACCTCCCTCACTAACATTACTCTTAATAAGAAGTGTAGCTTACTCAGGATCAGGAACAGGTTGAACAGTTTACCCACCTTTATCATCTATCTTATACCATCCATCATTATCAGTAGATTTTACAATTTTTTC…
RRGCO725-15	BOLD:AAA3920	Lepidoptera	Crambidae	Crambinae	Agriphila ruricolellus	AATATTATATATTATTTTTGCTTTATGATCAGGAATAATTGGAACTTCTATGAGATTTATTATTCGTATAGAATTAAGTAATCCTGGTGAATGAATTATAAATGATCAAATTTATAATTCTTTAGTAACAGCTCATGCTTTTTTAATAATTTTTTTTATAGTAATACCTTTTATAATTGGGGGATTTGGTAATTGATTAGTTCCTTTAATATTAGGATGTCCTGATATAGCTTTCCCTCGTATAAACAATATTAGATTTTGATTATTACCCCCATCTTTAATTTTATTATTATTAAGAAATTTATTTAATATTACTCCAGGAACAGGATGAACAGTTTATCCTCCATTATCTTCATCAATATTTCATAGATCTCCTTCAGTTGATTTAGCAATTTTTTC…
RRMFI4018-15	BOLD:AAK8834	Diptera	Limoniidae	Limoniinae	Metalimnobia triocellata	GACTTTATATTTTATCTTCGGAACTTGATCTGGAATAATTGGGACCTCTCTAAGACTCTTGATTCGATCAGAATTAGGAAACCCCGGGTCACTAATTGGAGATGACCAAATTTATAATGTTATTGTTACTGCTCATGCTTTTATTATAATTTTTTTTATAGTTATACCTTTTATAATTGGAGGTTTTGGAAACTGACTAATACCATTAATACTAGGAGCCCCTGATATAGCATTCCCTCGATTAAATAATATAAGATTTTGACTTCTCCCCCCGTCAATTTCTTTATTATTAATAAGAAGAATTGTTGAAAGTGGAGCCGGTACTGGGTGAACAGTTTATCCCCCCCTATCTTCTAATATTGCCCACGGTGGGTCATCTGTAGATTTAGCTATTTTTAG…
RRSSC4840-15	BOLD:AAH0152	Coleoptera	Cantharidae	Cantharinae	Cantharis rufa	AACTTTATATTTTTTATTTGGTATATGGGCAGGAATGGTTGGAACATCATTAAGAATCTTAATTCGGCTAGAATTAGGAACAACAAATAGATTAATTGGAAACGACCAAATTTATAATGTAATTGTAACAGCTCATGCTTTTATTATAATTTTTTTTATAGTTATACCAATTATAATTGGAGGGTTTGGAAATTGATTAGTGCCATTAATGATTGGGGCACCTGATATAGCTTTCCCTCGTTTAAATAATATAAGATTCTGACTTCTACCTCCTGCTCTAACTTTACTAATTTTTAGTAGATTAGTTGAAATAGGAGCAGGTACAGGATGAACAGTATACCCCCCTCTATCAGCTAATATAGCTCATAGAGGATCATCTGTCGACTTAGTAATTTTTAG…
RRSSC3245-15	BOLD:AAC1974	Diptera	Tephritidae	Tephritinae	Eurosta solidaginis	AACTTTATATTTTATTTTTGGAATTTGATCAGGAATAGTGGGAACTTCTTTAAGAATATTGATTCGAGTTGAATTAGGAAACCCAGGATCTTTAATCGGAAATGATCAAATTTATAATACAATTGTTACAGCCCATGCTTTTATTATAATTTTTTTTATAGTTATACCAATTATAATTGGAGGTTTTGGAAATTGATTGGTTCCTTTAATGTTAGGAGCTCCTGATATAGCTTTTCCTCGTCTTAACAACATAAGATTCTGACTTTTACCACCTTCTTTAATTCTTTTAATTTCAAGAAGAATCGTAGAAAACGGAGCTGGAACTGGATGAACAGTTTATCCACCTCTTTCTTCTAATATTGCCCATAGAGGAAGATCTGTTGACTTAGCTATTTTTTC…
RRMFI4208-15	BOLD:AAI6290	Hymenoptera	Vespidae	Eumeninae	Parancistrocerus cf. pedestris	AACCTTATATTTTATATTTGGTATATGAGCAGGAATAATAGGATCAGCAATAAGTTTAATTATTCGTATTGAATTAGGGCAACCTGGTAGATTTATTGGAGATGATCAAATTTATAATGTAATAGTAACAGCACATGCCTTTATTATAATTTTTTTTATAGTAATACCAGTTATAATTGGAGGATTTGGTAATTGATTAGTACCTTTAATAATTGGAGCCCCTGATATAGCATTCCCACGAATAAATAATATAAGATTCTGATTATTACCACCATCCTTAACCTTATTAATAATAAGAAGATTAACAGAAGCTGGGGCTGGAACAGGTTGAACTGTTTACCCTCCTTTATCTAGAAATTTATCACATAGAGGACCATCTGTAGATTTAGCAATCTTTTC…
RRMPC919-15	BOLD:AAB7105	Hymenoptera	Vespidae	Polistinae	Polistes dominula	AACATTATATTTCATTTTTGGTGCCTGAGCAGGAATAATCGGAACATCTTTAAGAATTTTAGTTCGAGCAGAATTAGGTCATCCTGGTGCACTAATTGGAGATGATCAAATTTATAATGTAATCGTCACAGCCCATGCATTTGTAATAATTTTTTTCATAGTCATACCAATTATAATTGGAGGATTTGGAAATTGATTAGTACCACTAATATTAGGAGCTCCTGATATAGCTTTTCCTCGAATAAATAATATAAGTTTTTGATTATTACCTCCTGCATTAACTTTACTACTCGTAAGTAGTATAGTAGAAAATGGAGCTGGAACAGGATGAACTGTTTATCCTCCTTTATCATCTAATATTGCTCACGGAGGTGCTTCTGTTGATTTAGCAATTTTTTC…
RRMFB1069-15	BOLD:AAP3780	Diptera	Tachinidae	Dexiinae	Cyrtophleba	TACTTTATATTTTATTTTTGGAGCTTGAGCAGGAATAGTAGGAACTTCTTTAAGTATCCTAATTCGAGCAGAATTAGGGCACCCCGGTGCTTTAATCGGAAATGACCAAATTTATAATGTTATTGTAACAGCTCATGCTTTTATTATAATTTTTTTTATAGTAATGCCTATTATAATTGGGGGGTTTGGAAATTGATTAGTTCCACTAATATTAGGAGCTCCTGATATAGCTTTCCCACGAATAAATAATATAAGTTTTTGACTTTTACCTCCCGCATTAACTTTATTATTAGTAAGTAGTATAGTAGAAAACGGGGCTGGAACAGGATGAACTGTTTATCCTCCTTTATCTTCAAATATTGCTCACGGAGGGGCTTCGGTTGATTTAGCTATTTTTTC…
RRMFI4046-15	BOLD:AAA2812	Lepidoptera	Nymphalidae	Nymphalinae	Phyciodes	AACTCTATATTTTCTGCTAGGTGCTTGAGCAGGGGTTGTTGGAACCTCCTTAAGATGAATAATTCGAATTGAATTAGGTACTCCAGGTACTTTTATTGGAAATGATCAAATTTATAATGTATTTGTTACTGCACACGCATTTATTATGATTTTCTTTATAGTTATGCCTATTATAATTGGAGGATTTGGGAATTGATTAGTACCCCTTATAATTGGAGCTCCTGATATAGCCTTCCCCCGAATAAATAATATAAGATTTTGACTTCTTCCCCCTTCCCTAACCTTGTTATTAATTAGAAGAATTGCTGAAGGAGGGGCAGGAACAGGATGGACCGTTTATCCCCCCTTATCTAGTAATATGGCCCATAGAGGTGCAGCAGTAGATTTAGCAATTTTCTC…
RRGCO249-15	BOLD:AAA4208	Lepidoptera	Geometridae	Sterrhinae	Scopula limboundata	AACATTATATTTTATTTTTGGAATTTGAGCAGGAATAGTAGGAACATCTTTAAGATTACTCATTCGTGCTGAATTAGGAAATCATGGATTTCTAATTGGAGATGATCAAATCTACAATACTATTGTTACAGCTCATGCATTTATTATAATTTTTTTTATAGTTATGCCAATTATAATTGGAGGTTTCGGAAATTGATTAGTACCTTTAATACTTGGTGCCCCAGACATAGCTTTCCCACGAATAAATAACATAAGATTTTGACTATTACCCCCCTCTTTAACTTTACTAATTTCTAGAAGAATTGTAGAAAATGGAGCTGGAACAGGATGAACAGTGTACCCCCCACTTTCATCTAATATTGCTCATAGTGGAAGATCTGTTGATTTAACTATTTTTTC…
RRSSC5002-15	BOLD:AAB2708	Hymenoptera	Halictidae	Halictinae	Agapostemon	AACCCTTTATTTTATTTTCGGTGCTTGAGCTGGAATAGTGGGAACTTCTTTGAGAATTTTAATTCGAGCCGAACTAGGACACCCTGGGGCTTTAATTGGAGATGATCAAATCTATAATGTTATTGTAACTGCTCACGCATTTGTAATAATTTTTTTTATAGTAATACCTATTATAATTGGGGGATTTGGAAATTGACTGGTGCCTTTAATACTAGGAGCACCTGATATAGCTTTCCCTCGAATAAATAATATAAGATTTTGACTCTTACCACCTTCATTAACCCTATTATTAGTCAGTAGTATAGTAGAAAATGGAGCTGGTACAGGCTGAACTGTCTACCCACCGCTCTCTTCCGGAATTGCCCATGGAGGTGCCTCAGTAGACTTAGCTATTTTTAG…
RRMFI4040-15	BOLD:AAG8897	Hemiptera	Cydnidae	Sehirinae	Sehirus cinctus cinctus	TACTTTATATTTTATTTTTGGTGCTTGAGCTGGAATAATTGGTACTTCTTTAAGAATTCTTATTCGAGCTGAATTAGGGCATCCAGGAGCTTTAATTGGCGACGATCAAATTTATAATGTAATTGTAACTGCTCATGCATTTATTATAATTTTTTTTATAGTTATACCAATTATAATTGGAGGATTTGGTAACTGATTAGTCCCTTTAATATTAGGAGCCCCAGATATAGCTTTCCCACGAATAAATAATATAAGATTTTGAATATTACCCCCTTCATTAACTTTATTATTAGCTAGAAGAATAGTTGATAATGGGGCTGGAACTGGTTGAACAGTATACCCCCCTCTATCTTCTGGAATTGCTCATAGAGGAGCTTCTGTAGATTTAGCTATTTTTTC…
RRGCO251-15	BOLD:AAA3083	Lepidoptera	Drepanidae	Drepaninae	Drepana arcuata	AACATTATACTTTATTTTTGGAATTTGAGCTGGAATAGTTGGAACTTCATTAAGATTGCTAATTCGAGCTGAATTAGGAAACCCCGGATCTTTAATTGGAGATGATCAAATTTATAATACTATTGTTACAGCACATGCTTTTATTATAATTTTTTTTATAGTTATACCTATTATAATTGGAGGATTTGGTAATTGACTTGTCCCATTAATATTAGGAGCCCCTGATATAGCATTCCCCCGGATAAATAATATAAGTTTTTGACTTTTACCACCCTCTTTAACCTTATTAATTTCAAGAAGAATTGTAGAAAATGGAGCAGGAACAGGATGAACAGTATACCCACCACTTTCATCCAATATTGCTCATGGAGGAAGATCTGTTGATTTAGCTATTTTCTC…
RRGCO202-15	BOLD:AAA6002	Lepidoptera	Noctuidae	Noctuinae	Tricholita signata	AACTATTTATTTTATCTTCGGAATTTGAGCAGGAATAATTGGAACTTCTCTTAGAATAATTATTCGAACTGAATTAGGAACTACTGACTCATTAATTAAAAATGATCAAATCTATAACGTATTAGTAACTGCCCATGCTTTTATTATAATTTTCTTTATAGTAATACCTATTATAATTGGAGGATTTGGAAATTGACTTATCCCCCTAATAATCGGAGCCCCAGATATAGCTTTCCCCCGAATAAATAATATAAGATTTTGATTACTTCCCCCCTCTCTTAATCTTTTATTAATTAGAGCTTTAATTGAAAGAGGAACAGGAACAGGATGAACTGTTTACCCCCCTCTTTCAAGAAATTTAGCCCATGCAGGAAGATCCGTTGATATTTCAATTTTTTC…
RRSSA2279-15	BOLD:AAC6184	Coleoptera	Cerambycidae	Cerambycinae	Xylotrechus colonus	AACTCTTTATTTCATTTTCGGGGCTTGAGCTGGAATAGTAGGGACTTCTTTAAGATTACTAATTCGAGCAGAATTAGGAAATCCTGGAAGATTAATTGGTGATGACCAAATCTATAATGTAATTGTCACTGCTCATGCTTTTATTATAATTTTCTTTATGGTTATACCTGTAGTTATTGGAGGTTTCGGAAATTGATTGGTTCCTTTAATACTAGGAGCCCCTGATATAGCCTTCCCTCGAATAAACAATATGAGATTTTGACTACTTCCCCCTTCTTTAACACTTCTTTTAATAAGAAGAATAGTAGAAAGAGGAGCTGGGACAGGATGAACTGTTTATCCTCCCCTATCATCTAATATTGCTCATGGTGGAGCTTCAGTAGATTTAGCAATTTTTAG…
RRMFI4075-15	BOLD:AAG6745	Diptera	Calliphoridae	Calliphorinae	Pollenia pediculata	AATACTATATTTTATTTTTGCTATGTGATCAGGAATGTTAGGGACTTCATTAAGAATATTAATTCGTCTTGAATTGGGAACCCCTAGCCAGATAATTAAAGATGACCAAATTTATAATTCTATTGTCACAGCCCATGCATTTATTATAATTTTCTTTATAGTTATACCATTCATAATTGGAGGATTTGGAAATTGATTAATCCCTCTAATAATTGGAGCCCCCGACATAGCTTACCCCCGAATAAACAACATAAGATTTTGGTTGCTCCCCCCCTCAATTTCTTTACTTTTATCAAGAAATTTTATTTCAAGTGGAGTTGGGACTGGCTGAACAGTCTACCCTCCCTTATCCTCAAACTTGATCCATAACAGCCCCGCCGTTGACTTCTCAATTTTTTC…
RRGCO430-15	BOLD:AAA5320	Lepidoptera	Tortricidae	Tortricinae	Acleris variana	AACATTATATTTTATTTTTGGAATTTGAGCAGGAATAGTAGGAACATCCCTAAGATTACTAATTCGTGCTGAATTAGGAACCCCCGGATCTTTAATTGGCGATGATCAAATTTATAATACTATTGTTACAGCTCATGCATTTATTATAATTTTTTTTATAGTAATACCAATTATAATTGGTGGATTTGGAAATTGATTAGTTCCATTAATACTAGGAGCACCTGATATAGCATTCCCACGAATAAATAATATAAGATTTTGATTATTGCCTCCCTCTTTAACCTTATTAATTTCTAGAAGAATTGTAGAAAATGGAGCTGGAACAGGATGAACAGTATACCCCCCCCTTTCATCTAATATTGCCCATAGAGGAAGATCTGTAGACTTAGCTATTTTTTC…
RRSSC4120-15	BOLD:AAM7524	Hymenoptera	Tenthredinidae	Nematinae	Nematus incompletus	AACTTTATATTTTATTTTTGGTGCATGATCAAGAATAATAGGAACTTCATTAAGAATCTTAATTCGTACTGAATTAAGAAATCCTGGAAGATTAATCGGAAATGATCAAATTTATAATGTAATTGTAACAGCCCATGCATTCATTATAATTTTTTTTATAGTTATACCAATTATAATTGGTGGTTTTGGTAATTGACTTGTCCCTCTTATACTAGGAGCACCAGATATAGCTTTCCCCCGATTAAATAATATGAGATTCTGATTACTTCCGCCTTCTTTAATCTTTTTAACAATAAGAAGAATTACAGAAAGAGGAGCTGGAACCGGTTGAACAGTTTATCCTCCTTTATCAAGAAATATTGCCCATAGTGGAACTTCTGTTGATTTAGCTATTTTTAG…
RRSSA2263-15	BOLD:ACA7844	Coleoptera	Cleridae	Tillinae	Cymatodera	AACATTATATTTTATATTCGGAATATGATCAGGAATAATTGGAATAATATTAAGAATGATTATCCGAGTTGAATTAGGGCAACCTGGACCATTCATTAATAATGATCAAATTTACAATACAATTATTACATCACATGCATTCATTATAATTTTCTTTATAGTAATACCTATTATAATTGGAGGATTTGGTAACTGATTACTACCAATTATAATTGGGGCACCAGACATGGCATTCCCACGAATAAATAATATAAGATTCTGACTCTTACCACCATCAATTAAACTACTATTAATTAGATCATTAGTTGAATCAGGAGTAGGAACAGGATGAACAGTATACCCCCCACTTTCTAGAAATATTGGGCATTCAGGACCAAATGTTGAATTTGCAATTTTTTC…
RRSSA219-15	BOLD:AAA3453	Diptera	Anthomyiidae	Anthomyiinae	Delia platura	AACTATATATTTTATTTTTGGTATTTGATCTGGTATAATTGGGACTACTTTGAGATTATTAATTCGTATTGAATTAGGTAATCCAGGGTCATTTATTGGTGATGATCAAATTTATAATGTAGTTGTTACAGCTCACGCATTTATTATAATTTTTTTTATGGTTATACCAATTATAATTGGAGGGTTTGGAAATTGACTTGTTCCCCTAATAATTGGTGCACCTGATATAGCTTTTCCTCGTATAAATAATATAAGATTTTGAATATTACCCCCTTCTTTAACTCTTTTATTAGTAAGAAGAATAGTTGATAATGGTGTAGGAACTGGTTGAACAGTTTACCCTCCTTTATCAAGTGGTTTAGCTCATGCAGGTTCTTGCGTCGATTTAGCAATTTTTTC…
RRMFD013-15	BOLD:AAP7637	Diptera	Xylophagidae	Xylophaginae	Xylophagus reflectens	AATTTTATATTTTTTAATCAGAATTTGATCAGGTATGTTAGGAGCATCATTAAGAATAATTATTCGAATTGAATTAGGAATTCCTGGGTCTTTAATTGGGAATGATCAGATTTATAATTCAATTGTTACGGCCCATGCATTTATTATAATTTTTTTTATGGTTATACCTTTTATAATTGGAGGATTTGGTAATTGATTAATTCCTTTAATAATTGGGGCCCCTGATATAGCCTTCCCTCGAATAAATAATATAAGTTTTTGGTTAATCCCTCCTTCATTAATAATTTTAATTTTAAGAAATATTTTGAATAATGGAGTTGGAACTGGTTGAACAGTTTATCCTCCATTATCTTTAAATATTAGTCATAATGGATCTTCAGTAGATATAGCAATTTTTTC…
RRMFG2330-15	BOLD:AAB2693	Lepidoptera	Geometridae	Larentiinae	Anticlea multiferata	AATTTTATATTTTATATTTGGTATATGATCAGGAATAATTGGTTCTTCGATAAGTATTATTATCCGCCTAGAATTAGGAACCCCCGGATTTTTAATTAATAATGATCAAATTTATAACTCAATTGTAACAGCACACGCTTTTATTATAATTTTCTTTATAGTTATACCAATTATAATTGGAGGATTTGGTAATTGATTAATCCCTTTAATACTAGGATCTCCAGATATAGCTTTCCCTCGAATAAATAATATAAGTTTTTGACTACTCCCCCCATCAATTTTTATATTAATCAATAGAAGAATTATTAATCAAGGTGTAGGGACAGGATGAACTATTTACCCTCCTCTTTCTTCAAATATTAATCATGAAGGTTTATCAATTGATATATCAATTTTTTC…
RRSSA3960-15	BOLD:AAF6824	Coleoptera	Staphylinidae	Staphylininae	Philonthus caeruleipennis	AATACTATATTTTATTTTTGCTATATGATCAGGAATAATTGGATCTTCACTTAGAATATTAATTCGTATAGAATTAAGAATCCCTGGAAGATGAATCTCCAATGACCAAATATTTAATACTATTGTTACTTCTCACGCATTTATTATAATTTTTTTTATAGTTATACCTTTTATAATTGGAGGTTTCGGAAATTGATTAGTACCATTAATAATTGGAGCACCAGATATAGCATTCCCACGAATAAATAATATAAGATTCTGACTTTTATCCCCTTCACTATTATTACTTCTATTAAGAAGAATATTAACATCAGGTTCAGGAACAGGATGAACCATTTATCCCCCATTATCATCTATTATATATCATAATTCAATATCGGTTGATTTAACAATTTTTTC…
RRMFI4230-15	BOLD:ABV1243	Diptera	Sarcophagidae		Brachicoma	AACTTTATATTTTATTTTTGGCCTATGGGCAGGAATATTGGGAACATCTTTAAGAATTTTAATTCGAGCCGAATTAGGAAACCCTGGAACTTTAATTGGAAATGACCAAATTTATAATGTAATTGTAACTGCCCATGCATTCGTTATAATTTTTTTTATGGTAATACCAATTATAATTGGGGGTTTTGGAAATTGATTAGTTCCCTTAATACTAGGGGCTCCAGATATAGCCTTTCCTCGAATAAATAATATGAGATTTTGATTATTGCCACCTTCTCTTTTATTTTTAGTGATAAGAAGAATTGTTGAAAATGGAGTAGGAACTGGATGAACAGTTTATCCACCTTTATCAGCTAATACCGCCCATAGGGGATCTTCTGTAGATTTAGCAATTTTTAG…
RRMFG2616-15	BOLD:ABZ7039	Diptera	Tachinidae	Exoristinae	Exorista	TGTATTATACTTTATTTTTGGTATATGAGCTGGAATATTAGGATCATCTATAAGAATTATTATTCGAATAGAATTAGGTAATCCTGGTATATTTATCAATAATGACCAAATTTATAATTCCATCGTAACAGCCCATGCCTTCATTATAATTTTTTTTATAGTTATACCAATTATAATTGGTGGATTTGGAAATTGATTAATCCCTTTAATATTAGGAGCCCCAGATATATCATTCCCACGTATAAACAATATAAGATTTTGATTATTACCCCCATCTTTATTTCTATTAATTAATAGAAGAATTATTAATCAAGGAGTTGGGACAGGTTGAACTGTTTACCCACCACTATCATTAAATATAAATCATGAAGGTATATCTGTAGATTTAGCCATCTTTTC…
RRSSA4293-15	BOLD:AAG2442	Diptera	Anthomyiidae	Anthomyiinae	Zaphne implicata	TATTTTATACTTTATTTTAGGTATATGATCAGGAATAATTGGTTCTTCATTGAGTATTATTATTCGTATAGAATTAGGGAATCCTGGTTATTTAATTAATAATGATCAAATTTATAACTCAATTATTACTATACATGCTTTCATTATAATTTTTTTTATAGTAATACCAATTATAATCGGAGGATTTGGAAATTGATTAATTCCCCTTATAATAGGAGCACCAGATATATCATTTCCACGAATAAATAATATAAGATTTTGATTACTACCACCATCTTTAATATTATTAATTAGAAGTAGTATTACAAATCAAGGAGTAGGGACCGGATGAACTATTTATCCACCATTATCATTAAATTTAAATCATGAAGGAATATCATTAGATATATCTATTTTTTC…
RRMPB104-15	BOLD:AAD0853	Diptera	Scathophagidae	Scathophaginae	Scathophaga furcata	TATACTATATTTTATCTTTGCTATATGATCAGCTTCTTTTGGTGCCTCATTAAGAATAATTATCCGCATAGAATTAAGAGTCCCAGGTGGATGAATTAATAACGATCAAATTTATAATTCAATTGTAACCTCACACGCATTTATTATAATTTTTTTTATAGTTATACCTTTCATAATTGGGGGATTTGGAAACTGATTAGTTCCCTTAATAATTGGAGCCCCAGATATAGCATTCCCACGAATAAATAATATAAGATTCTGATTATTAATTCCTTCACTATTTATATTAATCTTAAATATAATTTTTAATTCAGGATCAGGTACAGGATGAACTGTTTACCCTCCTCTTTCATCTATTGAATATCACCCCACATCATCAGTTGATTTCACCATTTTTTC…
RRGCO649-15	BOLD:AAA4282	Lepidoptera	Erebidae	Rivulinae	Rivula propinqualis	AACATTATATTTTATTTTTGGTATTTGAGCAGGAATAATTGGTACATCATTAAGTTTATTAATCCGAGCAGAATTAGGAAATCCTGGATCATTAATTGGAGATGACCAAATTTATAATACTATTGTTACAGCTCATGCTTTTATTATAATTTTTTTTATAGTAATACCTATTATAATTGGAGGATTTGGAAATTGATTAGTCCCATTAATATTAGGAGCCCCTGATATAGCTTTCCCCCGTATAAATAATATAAGTTTTTGACTTCTCCCCCCATCAATTATACTTTTAATTTCAAGAAGAATTGTAGAAAATGGAGCAGGAACAGGATGAACAGTGTACCCCCCACTTTCATCAAATATTGCTCATAGTGGAAGATCAGTAGATTTAGCAATTTTTTC…
RRGCO532-15	BOLD:AAA2331	Lepidoptera	Noctuidae	Eustrotiinae	Protodeltote albidula	AACTTTATATTTTATTTTTGGAATTTGAGCCGGTATAATCGGAACTTCATTAAGACTATTAATTCGAGCTGAATTAGGAAATCCAGGATCTTTAATTGGAGATGATCAAATTTATAATACTATTGTTACAGCTCATGCTTTTATTATAATTTTTTTCATAGTTATACCCATCATAATTGGAGGATTTGGAAATTGATTAGTACCTTTAATATTAGGAGCCCCTGATATAGCATTTCCACGAATAAATAACATAAGATTTTGATTACTCCCCCCCTCAATTACCCTTTTAATTTCAAGTAGAATTGTGGAAAATGGAGCTGGTACCGGATGAACTGTTTACCCCCCTCTTTCATCTAATATTGCCCATGGAGGAAGATCTGTCGATTTAGCTATTTTCTC…
RRMFD549-15	BOLD:AAJ6986	Hymenoptera	Ichneumonidae	Acaenitinae	Coleocentrus	AATTCTTTATTTCATTTTTGGTATATGATCAGGTATAATAGGATCATCTTTAAGATTATTAATTCGAATAGAACTAGGTAACCCTGGTTATTTAATTAATAATGATCAATTATATAATTCTATTATTACCTCCCATGCTTTTATTATAATTTTTTTTATAGTTATACCCATTATAATTGGAGGATTTGGAAATTGAATAATTCCTTTAATACTTGGGGCCCCTGATATAGCTTTCCCTCGAATAAATAATATAAGATTTTGACTTTTACCACCCTCTATTAATTTATTAATTTTAAGAAATATAACAAATCAAGGAGTTGGCACAGGATGAACAGTTTACCCGCCCCTTTCATTAAATTTAAATCATGAGGGAATAGCATTAGATATAGCAATTTTTTC…
RRGCO271-15	BOLD:AAA6692	Lepidoptera	Erebidae	Herminiinae	Renia adspergillus	AATATTATATATTATTTTTGCTTTATGATCAGGAATAATTGGAACTTCTATAAGATTTATTATTCGTATAGAATTAAGTAATCCTGGTGAATGAATTATAAATGATCAAATTTATAATTCTTTAGTTACAGCTCATGCTTTTTTAATAATTTTTTTTATAGTAATACCTTTTATAATTGGAGGATTTGGTAATTGATTAGTTCCTTTGATATTAGGATGTCCTGATATAGCTTTTCCTCGTATAAATAATATTAGATTTTGATTATTACCTCCATCTTTAATTTTATTATTATTAAGAAATTTATTTAATATTACTCCAGGAACAGGATGAACAGTTTATCCTCCATTATCTTCATCAATATTTCATAGATCTCCTTCAGTTGATTTAGCAATTTTTTC…
RRMFA194-15	BOLD:AAB8817	Diptera	Muscidae	Azeliinae	Muscina levida	AACATTATATTTTATTTTTGGAATTTGAGCAGGTATAGTAGGAACTTCCTTAAGATTATTAATTCGAGCTGAATTAGGAAACCCCGGATCTTTAATTGGAGATGATCAAATTTATAATACCATTGTTACTGCCCATGCTTTTATTATAATTTTTTTTATAGTTATACCTATTATAATTGGAGGTTTTGGTAATTGATTAATTCCTCTTATATTAGGAGCACCTGATATAGCTTTCCCTCGAATAAATAACATAAGTTTTTGATTACTCCCCCCATCTTTAACTTTATTAATTTCAAGAAGAATTGTAGAAAACGGAGCAGGAACAGGATGAACAGTTTACCCCCCACTTTCATCTAATATTGCTCACGGAGGAAGATCTGTAGATTTAGCTATTTTTTC…
RRGCO425-15	BOLD:AAA7738	Lepidoptera	Tortricidae	Olethreutinae	Spilonota laricana	AACATTATATTTTATTTTTGGAATTTGAGCAGGAATAGTTGGTACTTCTTTAAGATTACTAATTCGAGCTGAATTAGGAAACCCAGGATCTTTAATTGGAGATGATCAAATTTACAATACTATTGTTACCGCTCATGCTTTTATTATAATTTTTTTCATAGTTATACCTATTATAATTGGAGGATTTGGTAATTGATTAGTTCCTCTTATATTAGGAGCCCCTGATATAGCTTTCCCACGAATAAATAATATAAGTTTTTGATTGTTACCCCCATCTCTAACATTATTAATTTCAAGAAGTATTGTAGAAAATGGAGCAGGAACAGGTTGAACAGTGTACCCCCCACTTTCATCTAATATTGCCCATGGAGGTAGTTCTGTTGATTTAGCTATTTTTTC…
RRGCO691-15	BOLD:AAA6438	Lepidoptera	Geometridae	Larentiinae	Horisme intestinata	CACTTTATATTTCATCTTAGGAATATGAGCAGGAATATTAGGAACATCATTAAGATGAATTATTCGAATCGAATTAGGAATACCAGGATCATTCATTGGGGATGATCAAACATATAATGTAGTAGTCACCGCACATGCATTTATCATAATCTTTTTTATAGTAATACCAATCATAATTGGAGGATTTGGAAATTGACTAGTACCTTTAATAATTGGAGCCCCTGATATAGCATTCCCACGAATAAATAACATAAGATTCTGATTATTACCCCCCTCAATTACATTATTAATTATAAGAAGAATTGTAGAAAAAGGTGCAGGTACTGGATGAACAGTATATCCACCATTATCAGCAAACATCGCACATAATGGAGCATCAGTAGATTTAGCAATCTTCTC…
RRSSA2286-15	BOLD:AAU6911	Coleoptera	Melandryidae	Melandryinae	Emmesa connectens	AACATTATACTTTATTTTTGGTGCATGAGCTGGAATAGTAGGAACTTCATTAAGTATATTAATTCGAGCTGAATTAGGAAATCCTGGATCATTAATTGGAGATGACCAAATTTATAATGTTATTGTTACAGCACATGCATTTGTTATAATTTTTTTTATAGTAATACCAATTATAATTGGGGGATTTGGAAATTGATTAGTTCCATTAATATTAGGTGCACCTGATATAGCTTTTCCTCGAATAAATAATATAAGATTTTGACTTTTACCCCCATCTTTAACCCTTCTTTTGATAAGAAGATTAGTGGAAAGAGGAGCAGGTACCGGATGAACAGTATACCCTCCTTTATCATCTGGTATTGCCCATAGAGGAGCTTCTGTAGATTTAGCTATTTTTAG…
RRMFG2783-15	BOLD:AAA5620	Lepidoptera	Tortricidae	Tortricinae	Clepsis melaleucana	AACCCTATATTTTATTTTTGGAGCTTGAGCTGGAATAATTGGAACTTCTTTAAGAATTTTAATTCGAGCAGAATTAGGACATCCAGGAGCTTTAATTGGAGATGACCAAATTTATAATGTAATTGTAACAGCACATGCTTTTGTTATAATTTTTTTTATAGTAATACCAATTATAATTGGAGGATTTGGAAATTGATTAGTTCCGTTAATACTCGGGGCCCCTGATATAGCTTTCCCACGAATAAATAACATAAGTTTTTGAATATTACCCCCTTCATTAACCCTTTTATTAGCTTCTAGTATAGTAGAAGCAGGAGCAGGAACAGGATGAACAGTTTATCCCCCACTATCGGCTAGAATTGCCCATGGAGGGGCTTCAGTAGATTTAGCTATTTTTTC…
RRSSA2287-15	BOLD:AAG0759	Coleoptera	Pyrochroidae	Pyrochroinae	Schizotus cervicalis	AACATTATATTTCTTATTTGGAACTTGAGCCGGAATAGTAGGAACCTCTTTAAGTGTATTAATTCGTGCAGAACTTGGTCATCCTGGTGCTTTAATTGGAGATGATCAAATTTATAATGTTATTGTTACTGCTCATGCTTTTGTAATAATTTTTTTTATAGTAATACCAATTATAATTGGAGGATTTGGAAATTGATTAGTTCCTTTAATATTAGGAGCACCTGATATAGCCTTTCCTCGAATAAATAATATAAGTTTTTGATTATTACCTCCTTCTTTAACACTTTTATTAGTAAGAAGAATAGTTGAAAATGGAGCTGGGACAGGTTGAACAGTTTATCCACCTTTATCTGCAAGAATTGCTCATGGTGGAGCTTCTGTAGATTTAGCCATTTTTTC…
RRSSC6606-15	BOLD:AAY6650	Orthoptera	Tetrigidae	Tetriginae	Tetrix	AACACTGTATTTTATTTTTGGAGCTTGATCAGGAATAATTGGAACTTCTTTAAGAATTCTAATTCGAGCCGAACTAGGACATCCCGGTGCTTTAATTGGAGATGATCAAATTTATAACGTAATTGTTACAGCACATGCTTTTATTATAATTTTTTTTATAGTAATACCAATTATAATTGGAGGATTTGGAAACTGATTAGTTCCTTTAATACTTGGAGCTCCAGATATAGCCTTTCCACGAATAAATAATATAAGTTTTTGACTTCTTCCTCCTGCATTAACTCTTTTATTAGTCAGTAGTATAGTCGAAAACGGAGCTGGAACTGGTTGAACAGTTTACCCTCCTTTATCAGCTAATATCGCTCATGGAGGAGCTTCTGTTGATTTAGCTATCTTTTC…
RRMFI4021-15	BOLD:AAV0162	Hemiptera	Cicadellidae	Deltocephalinae	Eutettix variabilis	AATATTGTACTTCATTTTCGCCATATGAGCAGGGATAATTGGAGCCTCACTAAGATTTATTATTCGAATAGAACTAAGAAACCCAGGTGCTTGAATCAATAATGATCAAATTTATAATTCAATTGTAACTTCACACGCCTTCATTATAATTTTCTTCATAGTAATACCATTCATAATCGGAGGTTTCGGAAACTGACTCACACCGTTAATATTAGGAGCGCCCGACATGGCTTTCCCGCGAATAAACAACATAAGGTTCTGACTACTTCCTCCGTCAATCTTAATTATCCTAATAAGCATAATTTTAAATTCAGGATCAGGAACAGGATGAACAGTTTATCCCCCCCTATCATCATATTCCTTTCACCCATCATCATCAGTAGATTTAACAATTTTCTC…
RRSSC6587-15	BOLD:AAX9544	Coleoptera	Carabidae	Harpalinae	Diplocheila obtusa	AACATTATATTTTATTTTTGGAATTTGAGCCGGAATAGTGGGAACTTCTTTAAGTTTATTAATTCGAGCAGAATTAGGAAATCCCGGATCATTAATTGGAGATGATCAAATTTATAATACAATTGTAACAGCTCACGCTTTTATTATAATTTTTTTTATAGTTATACCTATTATAATTGGAGGATTTGGAAATTGATTAGTACCTTTAATATTAGGAGCTCCCGATATAGCTTTCCCTCGAATAAACAATATAAGATTTTGACTTCTTCCCCCCTCATTAACCCTTTTAATTTCAGGAAGAATTGTAGAAAATGGTACTGGAACTGGTTGAACAGTTTACCCCCCTTTATCATCTAATATTGCTCATAGAGGTAGATCTGTTGATTTATCAATTTTCTC…
RRSSA270-15	BOLD:ABX5569	Hymenoptera	Tenthredinidae	Nematinae	Cladius	AACATTATATTTTATTTTTGGATTTTGATCAGGAATACTAGGAATATCATTTAGAATATTAATCCGAACAGAATTAGGAATACCAGGATCTTTAATTGGAAATGATCAAATTTATAATGTAATTGTAACATCTCACGCATTTCTAATAATTTTTTTTATAGTTATACCAATTATAATCGGAGGATTTGGAAACTGATTAGTACCCCTAATATTAGGAGCTCCTGATATAGCATTCCCACGATTAAATAATATAAGATTTTGATTTCTACCCCCATCAATAATCCTATTATTATCAAGAAGTATAGTAAATTCAGGATCAGGAACAGGATGAACAGTTTATCCTCCTTTATCAAGAAGAATTTCACATGCAGGAGCATCTGTAGATTTAACTATTTTTTC…
RRSSC6594-15	BOLD:AAP8666	Coleoptera	Carabidae	Harpalinae	Ophonus puncticeps	AACTTTATATTTTATTTTTGGTGCTTGAGCAGGAATAGTTGGAACTTCTTTAAGAATTTTAATTCGCGCTGAATTAGGTCATCCAGGAGCATTAATTGGAAATGATCAAATTTATAATGTTATTGTAACAGCTCATGCTTTTATTATAATTTTTTTTATAGTTATACCTATCATAATTGGAGGATTTGGAAATTGATTAGTCCCGTTGATATTAGGGGCCCCCGACATAGCTTTTCCACGAATAAATAATATAAGTTTTTGAATACTTCCCCCCTCTTTAACTCTTTTACTAGCTTCTTCTATAGTAGAAGCTGGAGCAGGGACTGGTTGAACAGTTTATCCCCCTTTGTCAGCTAGAATTGCGCATGGAGGAGCATCAGTAGATTTAGCAATTTTTTC…
RRMPA009-15	BOLD:AAG2146	Diptera	Tachinidae	Exoristinae	Phorocera	TACTCTTTATTTCATTTTTGGAGCATGATCAGGGATAGTAGGAACTTCTTTAAGAGTTCTTATTCGTTCCGAATTAGGAAACCCTGGATCATTAATCGGAGATGACCAAATTTATAACGTTATCGTTACAGCTCATGCTTTCATTATAATTTTCTTTATAGTTATGCCTATTATAATTGGAGGATTCGGAAATTGATTAGTTCCTCTAATACTAGGAGCACCAGACATAGCATTTCCTCGAATAAATAATATAAGATTCTGACTTTTACCCCCTTCTTTAACCCTCTTAATTATAAGAAGAATTGTAGAAAGAGGAGCAGGGACAGGATGAACTGTATACCCACCTCTTTCTGCAAATGTTGCCCATAGAGGTTCATCTGTTGATCTAGCTATCTTCAG…
RRSSC7812-15	BOLD:AAA2219	Odonata	Coenagrionidae	Ischnurinae	Ischnura verticalis	GACTTTATATTTTATTTTTGGAGCTTGAGCAGGTATAGTAGGAACTTCTTTAAGAATTCTTATTCGAGCTGAATTAGGTCACCCAGGAGCTTTAATTGGAGATGATCAAATTTATAATGTAATTGTTACAGCCCATGCTTTCATTATAATTTTTTTCATAGTTATACCTATTATAATTGGGGGGTTCGGAAATTGACTAGTTCCTATTATACTTGGAGCTCCTGATATAGCATTCCCTCGAATAAATAATATAAGATTCTGATTACTTCCTCCTGCACTAACTCTATTATTAGTAAGTAGTATAGTGGAAAATGGAGCTGGAACAGGTTGAACTGTTTACCCTCCTCTATCTTCTAATATTGCACATGGAGGGGCTTCAGTAGATTTAGCAATTTTTTC…
RRSSC7829-15	BOLD:AAO3939	Diptera	Limoniidae	Limoniinae	Dicranomyia	TACTTTATACTTTATTTTTGGAGCCTGATCAGGAATAGTAGGAACTTCCCTAAGTATCCTAGTACGTGCTGAATTAGGACACCCTGGTGCTTTAATTGGAGATGATCAAATTTATAACGTAATTGTAACAGCTCATGCATTTATTATAATTTTTTTTATAGTTATACCAATTATAATTGGAGGATTTGGTAATTGATTAGTTCCTTTAATACTAGGAGCCCCAGATATAGCCTTTCCTCGAATAAATAATATAAGTTTTTGACTTCTACCTCCTGCACTAACTCTACTTCTAGTAAGTAGTATAGTTGAAAAGGGAGCTGGTACTGGCTGAACTGTTTACCCTCCCTTATCTTCTAATATTGCTCATAGAGGAGCTTCAGTAGATTTAGCAATTTTTTC…
RRMFC2001-15	BOLD:AAK7440	Coleoptera	Synchroidae		Mallodrya subaenea	TACTTTATATTTCTTATTTGGAGCCTGAGCTGGAATAGTAGGTACTTCATTAAGTATTTTAATTCGAGCAGAATTAGGACATCCAGGAGCATTAATTGGTGATGATCAAATTTATAATGTAATTGTCACTGCTCATGCATTTGTTATAATTTTCTTTATAGTTATACCTATTATAATTGGTGGATTTGGAAATTGACTAGTACCCCTAATACTAGGTGCCCCAGATATAGCATTTCCACGAATAAATAATATAAGATTTTGAATATTACCTCCATCTTTAACATTACTATTAGTAAGTAGTATAGTTGAAAATGGGGCTGGTACAGGTTGAACTGTTTACCCACCTTTATCATCAACAATTGCACATGGTGGTGCATCAGTTGATTTAGCTATTTTTAG…
RRMFG2779-15	BOLD:AAN8578	Diptera	Anthomyiidae	Anthomyiinae	Hylemyza partita	AACATTATATTTTTTATTCGGATTTTGATCAGGAATATTAGGGTTATCTTTTAGAATATTAATCCGAACAGAACTAGGCATACCTGGATCAATAATTGGAGATGATCAAATTTATAATGTTATTGTTACATCACATGCATTCTTAATAATTTTTTTTATAGTTATACCTATTATAATTGGAGGATTTGGTAATTGATTAATCCCATTAATATTAGGAGCACCAGATATAGCATTTCCACGATTAAACAATATAAGATTTTGATTTTTACCCCCTTCAATTACTTTATTATTAGCTAGAAGAATAGTTAATTCAGGATCAGGAACAGGATGAACAGTTTATCCTCCTCTATCAAGAAGTATTTCTCATGCAGGACCATCAGTTGATTTAACTATTTTTTC…
RRGCO124-15	BOLD:AAB4409	Lepidoptera	Tortricidae	Tortricinae	Aethes biscana	TACTTTATATTTTATTTTTGGAATTTGAGCAGGAATAGTAGGAACTTCTTTAAGACTTTTAATTCGAACTGAATTAGGAAATCCCGGATCTTTAATTGGAGATGACCAAATTTATAATACTATTGTTACAGCTCATGCTTTTATTATAATTTTTTTTATAGTTATACCTATTATAATTGGAGGATTTGGAAATTGATTAGTACCTTTAATATTAGGAGCTCCTGATATAGCTTTCCCCCGAATAAATAATATAAGTTTTTGATTACTACCCCCATCATTAATTTTATTAATTTCTAGTAGAATTGTAGAAAATGGAGCAGGAACAGGATGAACAGTTTACCCACCCCTCTCATCTAATATTGCCCATAGAGGAGCTTCAGTAGACTTAGCAATTTTTTC…
RRGCO478-15	BOLD:AAB3571	Lepidoptera	Tortricidae	Tortricinae	Cochylis hoffmanana	AACATTATACTTTATTTTTGGAATTTGATCTGGTATAGTAGGAACATCATTAAGATTATTAATTCGAGCAGAATTAGGTAATCCAGGATCCTTAATTGGAGATGATCAAATTTATAATACTATTGTAACTGCTCATGCATTTATTATAATTTTTTTTATAGTTATACCTATTATAATTGGAGGATTTGGAAATTGATTAGTACCTTTAATATTAGGAGCACCTGATATAGCTTTCCCACGAATAAATAATATAAGATTTTGATTACTTCCTCCTTCATTAATATTATTAATTTCAAGAAGAATTGTTGAAAATGGAGCAGGAACAGGATGAACAGTATACCCCCCACTTTCATCTAATATTGCTCATAGAGGAAGTTCTGTAGATATAGCTATTTTTTC…
RRMFC2016-15	BOLD:AAC2498	Diptera	Muscidae	Phaoniinae	Helina evecta	TATATTATATTTTTTATTTGGTATATGAGCTGGAATAGTAGGATTATCAATAAGTTTAATTATTCGTATAGAGTTAGGGATGCCTGGGAGATTACTTGGAAATGATCAAATTTATAATAGAATAGTTACAGCACATGCTTTTGTAATAATTTTTTTTATGGTTATACCAATTATAGTAGGTGGATTTGGAAATTGATTATTACCTTTAATATTAGGGGCGCCTGATATAGCTTTCCCTCGAATAAATAATATAAGATTTTGATTACTTATTCCTTCTTTGATTTTATTATTATTAAGAGGTATTTTAAATGTTGGTGTAGGTACTGGATGAACTGTTTATCCTCCTTTATCTTCATCTTTAGGTCATAGAGGAATTTCAGTTGATTTAGCTATTTTTTC…
RRMFD562-15	BOLD:ACJ0017	Coleoptera	Staphylinidae	Staphylininae	Platydracus cinnamopterus	AACATTATATTTTATTTTTGGAATTTGAGCAGGTATAGTTGGAACTTCTTTAAGATTATTAATTCGAGCTGAATTAGGAAATCCTGGATCTTTAATTGGAGATGATCAAATTTATAATACTATTGTAACAGCTCATGCCTTTATTATAATTTTCTTTATAGTTATACCTATTATAATTGGAGGATTTGGTAATTGATTAGTTCCTCTAATATTAGGAGCCCCTGATATAGCTTTTCCTCGAATAAATAATATAAGTTTTTGACTCCTCCCCCCCTCACTAACTTTATTAATTTCAAGAAGAATTGTAGAAAATGGAGCTGGTACAGGATGAACAGTATACCCCCCACTTTCATCTAATATTGCCCATAGAGGAAGCTCAGTAGACTTAGCTATTTTTTC…
RRMFB1229-15	BOLD:ADF4439	Diptera	Tachinidae	Exoristinae	Gonia	AACTTTATATTTTATTTTTGGAATCTGATCAGGTATAGTAGGAACATCTATAAGTCTTTTAATTCGAGCTGAATTAGGAACCCCTGGATCTTTAATTGGAGATGATCAAATTTATAATACTATTGTTACAGGTCATGCTTTCATTATAATTTTTTTTATAGTTATACCTATTATAATTGGAGGTTTTGGAAATTGATTAGTCCCATTAATATTAGGAGCTCCAGATATAGCTTTCCCACGAATAAATAATATAAGTTTTTGACTTTTACCCCCCTCTCTTACTTTATTAATTTCAAGAAGAATTGTAGAAAATGGAGCAGGAACTGGTTGAACAGTATACCCTCCTTTATCTTCTAATATTGCTCATGGAGGAAGTTCTGTTGATCTAGCTATTTTTTC…
RRSSA244-15	BOLD:AAD3177	Diptera	Pipunculidae	Nephrocerinae	Nephrocerus	TACTTTATATTTTATTTTTGGAGCTTGATCAGGTATAATTGGTACTTCATTAAGAATTTTAATTCGGGCTGAATTAGGACATCCTGGTGCTTTAATTGGAGATGATCAAATCTATAATGTAATTGTAACAGCACATGCTTTTATTATAATTTTTTTTATAGTAATACCAATTATAATTGGAGGATTTGGAAATTGATTAGTTCCTTTAATATTAGGAGCTCCAGATATAGCATTTCCACGAATAAACAATATAAGTTTTTGATTACTACCTCCTGCTTTAACATTATTGTTAGTTAGTAGTATAGTTGAAAATGGAGCTGGAACTGGATGAACTGTTTACCCTCCGCTTTCTTCTAATATTGCTCATGAAGGAGCTTCTGTTGATTTAGCAATTTTTTC…
RRGCO629-15	BOLD:AAA1518	Lepidoptera	Crambidae	Scopariinae	Scoparia biplagialis	AACATTATATTTTATTTTTGGTATTTGAGCTGGAATAGTAGGAACTTCATTAAGATTATTAATTCGAGCCGAATTAGGAAATCCTGGTTCTTTAATTGGTGATGATCAAATTTATAATACTATTGTTACAGCACATGCTTTTATTATAATTTTTTTTATAGTTATACCTATTATAATCGGAGGATTTGGTAATTGACTTGTTCCTCTTATATTAGGAGCCCCAGATATAGCTTTCCCTCGAATAAATAATATAAGTTTTTGACTTCTTCCCCCCTCTTTAACTCTTTTAATTTCGAGTAGAATTGTAGAAAATGGAGCAGGTACAGGATGAACAGTATATCCCCCACTTTCATCTAATATTGCTCATGGGGGTAGATCTGTAGATTTAGCTATTTTCTC…
RRMFB1276-15	BOLD:AAG6757	Diptera	Muscidae	Muscinae	Eudasyphora	AACCCTTTATTTTATTTTCGGAGCATGAGCCGGAATACTAGGTACCTCCTTAAGACTACTAATCCGAGCAGAATTAGGCAATCCAGGTTCACTGATTGGTAATGACCAAATCTACAATGTTATTGTAACAGCTCACGCTTTCATCATAATTTTCTTTATAGTTATACCAATCATAATTGGAGGATTCGGAAACTGACTAGTCCCCCTAATACTTGGGGCCCCAGACATGGCATTCCCTCGAATAAACAACATAAGATTCTGATTGCTTCCACCGTCACTAAGACTTTTATTAATAAGAAGAATTGTAGAAAACGGAGCAGGGACAGGATGAACTGTCTACCCCCCTCTCTCAGCAAATATTGCCCACAGAGGATCTTCAGTTGATTTAGCAATTTTTAG…
RRGCO711-15	BOLD:AAA4456	Lepidoptera	Geometridae	Ennominae	Speranza pustularia	AATATTATATTTTATTTTCGCTATATGATCTGGAATAATTGGTTCATCAATAAGAATATTAATTCGTATAGAATTAAGAATTCCTGGAAGATGAATTTCAAATGATCAATTATTTAATACTATTGTAACTTCTCATGCATTTATTATAATTTTTTTCATAGTTATACCTTTTATAATTGGAGGATTCGGAAATTGACTTATCCCATTAATAATTGGAGCTCCAGATATGGCCTTTCCACGAATAAATAACATAAGATTTTGACTTTTAGTCCCATCATTATTTTTATTACTATTAAGAAGAATATTAATACCAGGATCTGGGACAGGTTGAACAATTTACCCCCCATTATCATCCATCATTTACCATAATTCTAGATCTGTTGATTTAACAATTTTTTC…
RRMFG2647-15	BOLD:AAP8649	Diptera	Tachinidae	Dexiinae	Athrycia cinerea	GACTCTATATTTTATTTTTGGTGCATGAGCTGGAATAGTAGGAACTTCATTAAGTCTACTAATTCGATCAGAGCTGGGTACACCCGGAACATTAATTGGTAATGACCAAATTTATAATGTTATTGTTACTGCTCATGCTTTTATCATAATTTTCTTTATAGTTATACCAATTATAATTGGAGGATTTGGAAATTGATTAGTACCCCTAATATTAGGAGCACCTGATATAGCATTTCCACGAATAAATAATATAAGATTTTGACTTTTACCTCCGTCCCTATCTTTACTTTTAATAAGAAGAATAGTAGAAAGAGGGGCAGGAACAGGATGAACTGTTTATCCTCCTTTATCTTCAAATATTGCTCATGGGGGTTCTTCTGTTGATTTAGCAATCTTCAG…
RRSSC6090-15	BOLD:AAD6344	Hemiptera	Membracidae	Smiliinae	Publilia concava	AATCTTATATTTCATTTTTGGAATATGATCAGGAATAATTGGATCTTCTATAAGTATAATTATTCGATTGGAATTAGGAAATCCTGGTTATTTAATTAATAATGATCAAATTTATAACTCTATAGTAACTTCACATGCTTTTATTATAATTTTTTTTATAGTAATACCAATTATAATTGGAGGATTTGGCAACTGATTAATCCCTTTAATATTAGGAGCCCCCGATATAGCCTTTCCTCGTATAAATAATATAAGATTTTGACTCCTCCCACCTTCTCTTATATTATTACTTTTTAGAAATATCTCAAATCAAGGTGTTGGAACAGGATGAACAGTTTATCCTCCTTTATCTTTAAATATAAGACATGAAGGATTAGCTGTTGATCAATCAATTTTTTC…
RRGCO704-15	BOLD:AAB1584	Lepidoptera	Crambidae	Crambinae	Crambus albellus	TACATTATATTTTATATTTGGAATTTGAGCAGGTATAGTAGGAACATCATTAAGATTATTAATTCGAGCTGAACTAGGAAATCCTGGATCTTTAATTGGTGATGATCAAATTTATAATACTATTGTAACAGCTCATGCTTTTATTATAATTTTTTTTATAGTTATACCTATTATAATTGGAGGATTTGGAAATTGATTAGTTCCTTTAATATTAGGAGCCCCTGATATAGCTTTCCCTCGTATAAATAATATAAGATTTTGACTTTTACCCCCTTCTATTATACTTTTAATTTCAAGAAGAATTGTAGAAAATGGAGCTGGTACAGGATGAACAGTATACCCCCCACTTTCATCAAATATTGCTCATAGAGGAAGATCAGTAGATTTAGCAATTTTTTC…
RRMFD001-15	BOLD:AAG0317	Hemiptera	Membracidae	Smiliinae	Entylia carinata	AACTTTATATTTTATCTTTGGAATCTGAAGAGGAATAGTAGGAACATCTTTAAGTTTACTTATTCGAGCTGAATTAGGAAATCCAGGATCTTTAATTGGAGATGATCAAATTTATAACACAATTGTTACAGCTCATGCATTTATTATAATTTTTTTTATAGTTATGCCAATTATAATTGGAGGATTTGGAAATTGATTAATCCCTCTTATATTAGGAGCCCCTGATATAGCATTTCCACGAATAAATAATATAAGATTTTGATTACTACCTCCTTCTTTAACTCTTTTAATTTCAAGAAGAATTGTAGAAAATGGAGCAGGAACTGGGTGAACTGTTTATCCCCCTCTTTCATCTAATATTGCCCATGGAGGAAGCTCAGTTGATTTAGCAATTTTCTC…
RRSSA2346-15	BOLD:AAL4632	Coleoptera	Lucanidae	Lucaninae	Platycerus depressus	AACTTTATATTTTATTTTTGGAATTTGAGCAGGAATAGTAGGAACTACCTTAAGTCTTTTAATTCGGGCTGAATTAGGAACTCCAGGATCTTTAATTGGTGATGATCAAATTTATAATACTATTGTTACTGCCCATGCTTTTATTATAATTTTTTTTATGGTAATACCTATTATAATTGGAGGATTTGGAAATTGATTAGTGCCTCTTATATTAGGGGCCCCAGATATAGCTTTCCCTCGTATAAATAATATAAGATTTTGACTTTTACCACCTTCTTTAATACTTTTAATTTCTAGAAGAATTGTAGAAAATGGAGCAGGAACAGGTTGAACTGTTTATCCCCCCCTCTCATCTAATATTGCACATGGAGGAAGATCTGTGGATTTGGCTATTTTTTC…
RRGCO309-15	BOLD:AAA3430	Lepidoptera	Geometridae	Larentiinae	Orthonama obstipata	AACTTTATATTTTTTATTAGGAATTTGATCAGGAATAGTAGGAACATCTATAAGATTATTAATTCGAGCTGAATTAGGTACTCCCGGTTCCTTAATTGGTGATGATCAAATTTATAATACTATTGTCACTGGACATGCTTTTATTATAATTTTTTTTATAGTAATACCTATTATAATTGGAGGATTTGGAAATTGATTAGTACCTTTAATACTAGGAACTCCTGATATGGCTTTTCCTCGAATAAATAATATAAGATTTTGACTTTTACCTCCTTCTCTTACTTTATTAATTTCCAGAAGAATTGTAGAAAATGGAGCTGGAACAGGATGAACAGTATACCCCCCACTTTCATCTAATATCGCTCATGGTGGAAGATCAGTTGATTTAGCTATTTTCTC…
RRBPA087-15	BOLD:AAF7101	Diptera	Fanniidae	Fanniinae	Fannia	CACCTTATACTTTATATTTGGAGCATGAGCTGGAATAGTAGGAACTTCTATAAGAATAATTATTCGAGCAGAACTAGGACAACCAGGATCTCTAATTGGAGATGACCAAATCTATAATGTAATTATTACAGCCCACGCATTTGTAATAATTTTCTTTATAGTAATGCCTATTATAATTGGAGGATTTGGTAATTGACTTGTACCATTAATAATTGGAGCACCAGATATAGCTTTTCCACGAATAAATAATATAAGTTTTTGACTTTTACCACCATCACTAACCCTTTTACTTTCCTCATCTATGGTTAATAATGGAGCTGGTACAGGATGAACAGTTTACCCCCCACTCGCTGGGGCGATTGCACATGGAGGAGTGTCAGTTGATTTAGCTATTTTCTC…
RRSSC4128-15	BOLD:AAF9187	Coleoptera	Curculionidae	Entiminae	Phyllobius oblongus	AACATTATACTTTATTTTTGGAATTTGAGCTGGAATATTAGGAACTTCTTTAAGTTTATTAATTCGAGCTGAATTAGGAAATCCTGGATCATTAATTGGTGATGATCAAATTTATAATACTATTGTAACTGCACATGCTTTTATTATAATTTTTTTTATAGTTATACCTATTATAATTGGAGGTTTTGGAAATTGATTAGTACCTTTAATATTAGGAGCTCCTGATATAGCTTTCCCCCGAATAAATAATATAAGATTTTGACTTCTCCCCCCATCATTAACTCTCCTAATTTCAAGAAGAATTGTAGAAAATGGTAGAGGTACTGGTTGAACAGTTTACCCCCCTTTATCATCTAATATTGCTCATAGAGGAAGATCAGTTGATTTATCTATTTTTTC…
RRSSA2264-15	BOLD:AAU6910	Coleoptera	Cleridae	Tillinae	Cymatodera bicolor	AACATTATATTTTATTTTTGGAGTATGAGCTGGAATAGTAGGAACTTCTTTAAGTTTATTAATTCGAGCTGAATTAGGAAATCCAGGTTCATTAATTGGGGATGATCAAATTTATAATACAATTGTAACTGCCCATGCATTTATTATAATTTTTTTTATAGTTATACCAATTATAATTGGAGGTTTTGGAAATTGATTAGTACCTTTAATATTAGGAGCTCCTGATATAGCTTTTCCCCGTATAAATAATATAAGTTTTTGATTATTACCTCCTTCTATTATATTATTAATTTCTAGAAGAATCGTAGAAAATGGAGCAGGAACTGGATGAACAGTTTACCCCCCACTTTCATCTAATATTGCTCATAGAGGAAGATCAGTAGATCTTGCAATTTTTTC…
RRMPG971-15	BOLD:AAP2970	Diptera	Anthomyiidae	Anthomyiinae	Anthomyia pluvialis	AACTTTATATTTTATATTTGGAATATGATCAGGAATAATTGGAATAATATTAAGAATAATTATTCGTGTAGAATTAGGTCAACCAGGGCCATTTATTAATAATGATCAAATTTACAACACAATTATTACATCTCATGCATTCATTATAATCTTCTTTATAGTAATACCAATTATAATTGGAGGATTCGGAAATTGATTATTACCAATTATAATTGGAGCTCCAGATATAGCATTCCCACGGATAAACAATATAAGATTCTGGCTTCTACCACCATCAATTAAAATACTTCTAATTAGATCAATAGTAGAATCAGGAGTTGGTACAGGATGAACAGCTTACCCACCATTATCTAGAAATCTAGGACACTCTGGACCTAGAGTTGAATTTGCAATCTTTTC…
RRGCO700-15	BOLD:AAA4213	Lepidoptera	Geometridae	Sterrhinae	Idaea dimidiata	AACTTTATATTTTATTTTTGGAATTTGAGCTGGAATAGTTGGAACATCTTTAAGTTTATTAATTCGGGCAGAATTAGGAAATCCTGGATCTTTAATTGGAGATGATCAAATTTATAATACTATTGTCACAGCTCATGCCTTTATTATAATTTTTTTTATAGTAATACCTATTATAATTGGGGGATTTGGAAATTGATTAGTACCATTAATATTAGGGGCCCCAGATATAGCTTTCCCTCGAATAAATAATATAAGTTTTTGACTTTTACCCCCATCATTAACTCTTTTAATTTCAAGAAGAATTGTTGAAAATGGAGCTGGTACCGGATGAACAGTTTATCCCCCACTATCATCTAATATCGCACATGGAGGAAGATCTGTTGATCTAGCAATTTTTTC…
RRSSC1835-15	BOLD:AAP2967	Diptera	Anthomyiidae	Anthomyiinae	Hylemya	AACTTTATACTTTATTTTCGGAGCTTGAGCAGGTATAGTGGGAACTTCATTAAGAATTCTTATTCGAGCAGAATTAGGTCACCCTGGTGCATTAATTGGAGATGATCAAATTTATAATGTAATTGTTACAGCCCATGCTTTTATTATAATTTTCTTTATAGTAATACCAATTATAATTGGAGGGTTTGGAAATTGACTAGTACCAATTATATTAGGAGCTCCTGATATAGCTTTCCCCCGAATAAATAATATAAGTTTTTGACTTTTACCTCCAGCATTAACATTACTACTAGTAAGTAGTATAGTAGAAAACGGAGCTGGAACAGGATGAACTGTTTACCCTCCTTTATCATCTAATATTGCCCATGGAGGAGCTTCTGTTGATTTAGCTATTTTCTC…
RRGCO316-15	BOLD:AAA2955	Lepidoptera	Tortricidae	Tortricinae	Argyrotaenia occultana	AACATTATATTTTATTTTTGGTATTTGAGCTGGAATAGTAGGAACTTCATTAAGACTATTAATTCGAGCTGAATTAGGAAATCCCGGATCATTAATTGGAGATGATCAAATTTATAATACTATTGTCACTGCACATGCTTTCATTATAATTTTTTTTATGGTAATGCCTATTATAATTGGCGGATTTGGAAATTGATTAGTACCCTTAATATTAGGAGCCCCTGATATAGCTTTTCCACGAATAAATAATATAAGATTTTGATTATTACCTCCCTCTATTATATTATTAATTTCGAGTAGAATTGTAGAAAATGGAGCAGGAACTGGATGAACAGTTTATCCCCCACTTTCATCAAATATTGCCCATAGCGGAAGATCTGTAGATCTTGCTATTTTTTC…
RRSSC1911-15	BOLD:AAE8158	Hymenoptera	Crabronidae	Crabroninae	Ectemnius continuus	AACCTTATACTTTATTTTTGGTACTTGAGCCGGAATAGTGGGAACTTCATTAAGACTTATTATTCGAGCAGAACTTGGTCACCCAGGAACCTTAATTGGAGATGATCAAATTTATAATGTTATTGTAACAGCTCATGCTTTTGTAATAATTTTTTTCATGGTAATACCAATTATAATTGGAGGATTTGGTAACTGATTAGTTCCTCTTATACTAGGAGCTCCAGATATAGCTTTCCCACGAATAAATAATATAAGATTTTGGATATTACCTCCTTCTCTAACTTTATTATTAGCAAGTAGAATAGTGGAAACTGGGGCAGGTACTGGTTGAACCGTTTACCCCCCACTATCTTCAGGGATTGCTCATATAGGAGCTTCTGTTGATTTAGCAATTTTTTC…
RRSSA2306-15	BOLD:AAD5192	Hymenoptera	Ichneumonidae	Pimplinae	Pimpla pedalis	AACATTATATTTTTTATTAGGATTTTGATCAGGAATATTAGGACTATCATTTAGAATACTAATTCGAACAGAACTAGGAATACCAGGATCTATAATTGGTGATGACCAAATTTATAATGTAATTGTTACATCACATGCATTCTTAATAATTTTCTTTATAGTAATACCTATTATAATTGGGGGATTCGGTAATTGATTAATTCCATTAATATTAGGAGCCCCAGATATAGCATTCCCACGATTAAATAACATAAGATTTTGATTTCTACCCCCCTCATTATTACTATTATTATCAAGAAGAATAGTAAACTCAGGATCAGGAACTGGATGAACTGTTTATCCACCTCTATCAAGAAGAATCTCCCATTCAGGAGCATCTGTAGATTTAACAATTTTTTC…
RRGCO088-15	BOLD:AAB5712	Lepidoptera	Pyralidae	Phycitinae	Acrobasis indigenella	AACTTTATATTTTATTTTTGGAATTTGAGCAGGTATAGTAGGAACTTCTCTTAGATTATTAATTCGAGCAGAATTAGGAACTCCTGGATCATTAATTGGAGATGATCAAATTTATAATACTATTGTAACAGCTCATGCTTTTATTATAATTTTTTTTATAGTTATACCTATTATAATCGGAGGATTTGGTAATTGATTAGTTCCCTTAATATTAGGAGCCCCAGATATAGCCTTTCCTCGAATAAATAATATAAGTTTTTGACTTCTACCACCTTCACTTACTCTTTTAATTTCTAGAAGAATTGTAGAAAATGGAGCAGGAACAGGATGAACTGTTTATCCCCCCCTTTCATCAAATATTGCTCATAGAGGAAGATCAGTAGATTTAGCTATTTTTTC…
RRSSC1944-15	BOLD:AAH2187	Hymenoptera	Ichneumonidae	Tryphoninae	Acrotomus succinctus	AACATTATATTTTATTTTCGGAGCATGAGCAGGAATAATTGGAACTTCATTAAGTATTTTAATTCGAGCTGAATTAGGACATCCAGGAGCACTTATCGGAAATGATCAAATTTATAATGTAATTGTAACAGCTCATGCATTTATTATAATTTTTTTTATAGTAATACCAATTATAATTGGAGGATTTGGAAATTGATTAGTTCCTTTAATATTAGGAGCTCCTGATATAGCTTTTCCACGAATAAATAATATAAGTTTTTGACTTTTACCTCCTGCTTTAACTCTATTATTAGTAAGTAGTATAGTAGAAAACGGAGCTGGAACAGGATGAACTGTTTATCCTCCATTATCTTCAAATATTGCTCATGGTGGAGCTTCTGTAGATTTAGCAATTTTTTC…
RRMFE2511-15	BOLD:AAF0126	Hemiptera	Pentatomidae	Asopinae	Podisus brevispinus	TACTTTATATTTTATTTTTGGTGCATGATCTGGTATAGTAGGAACTTCATTAAGAATTTTAATTCGAGCAGAATTAGGACACCCTGGTGCATTAATTGGTGACGACCAAATTTATAATGTAATTGTTACAGCTCATGCTTTTATTATAATTTTCTTTATAGTTATACCTATTATAATTGGAGGATTTGGTAATTGACTAGTTCCATTAATATTAGGAGCTCCAGATATAGCCTTTCCTCGAATAAATAATATAAGTTTCTGATTACTACCTCCTGCTTTAACCCTTCTTCTTGTAAGTAGTGTAGTTGAAAAGGGAGCTGGTACTGGATGAACTGTTTACCCACCCCTATCATCTAATATCGCTCATGGAGGAGCCTCAGTAGATTTAGCTATTTTTTC…
RRGCO562-15	BOLD:AAB3457	Lepidoptera	Tortricidae	Tortricinae	Sparganothis unifasciana	AACTTTATATTTTATTTTTGGAATCTGAGCAGGAATAGTAGGGACATCTTTAAGTTTATTAATTCGAGCTGAATTAGGTAATCCAGGATCATTAATTGGAGATGATCAAATTTATAATACTATTGTTACAGCTCATGCTTTTATTATAATTTTTTTTATAGTTATACCAATTATAATTGGTGGATTTGGAAATTGATTAGTACCATTAATACTGGGGGCACCTGATATGGCTTTCCCACGAATAAATAATATAAGATTTTGATTATTACCACCTTCCTTAACCCTTTTAATTTCAAGAAGAATTGTTGAAAATGGAGCTGGAACAGGATGAACAGTATACCCCCCACTCTCATCTAACATTGCTCATGGTGGTAGATCTGTAGATTTAGCAATTTTTTC…
RRSSC7811-15	BOLD:AAA5874	Odonata	Coenagrionidae	Coenagrioninae	Nehalennia irene	AACATTATATTTTTTATTTGGAACTTGAGCTGGGATAGTAGGAACTTCTTTAAGAATTTTAATTCGTGCAGAACTTGGTCATCCAGGAGCTTTAATTGGAGATGATCAAATTTATAATGTAATTGTTACAGCTCATGCTTTTGTTATAATTTTTTTTATAGTAATACCAATTATAATTGGAGGATTTGGAAATTGATTAGTTCCCCTAATACTAGGAGCTCCAGATATAGCATTTCCTCGAATAAATAATATAAGTTTTTGACTATTACCTCCTTCTTTAACTTTATTACTAATAAGTAGTATAGTTGAAAATGGGGCTGGAACAGGATGAACAGTTTATCCTCCTCTTTCTTCTAGAATTGCTCATAGAGGAGCTTCTGTTGATTTAGCAATTTTTTC…
RRMFC2013-15	BOLD:ACF4734	Diptera	Syrphidae	Syrphinae	Platycheirus hyperboreus	TACTTTATACTTTATTTTTGGAGCTTGATCAGGAATGATCGGAACTTCATTAAGAATTTTAATTCGAGCCGAACTAGGACACCCTGGAGCATTAATTGGTGATGACCAAATCTATAATGTAATTGTTACAGCTCATGCTTTTATTATAATTTTTTTTATAGTAATACCAATTATAATTGGAGGATTTGGTAATTGATTAGTCCCTTTAATGTTAGGAGCCCCAGATATAGCTTTCCCTCGGATAAACAATATAAGTTTCTGACTTTTACCTCCTGCATTAACTTTACTATTAGTAAGTAGTATAGTGGAAAACGGAGCTGGAACAGGATGAACTGTTTACCCACCTTTATCATCTAATATCGCTCATGGAGGAGCTTCTGTTGATTTAGCTATTTTTTC…
RRMPE028-15	BOLD:AAG2128	Diptera	Tachinidae	Exoristinae	Cryptomeigenia	AACACTATATTTTCTTTTTGGGGCCTGAGCTGGAATACTTGGAACTTCTTTAAGATTATTAATTCGAGCCGAATTAGGAAATCCTGGTTCTCTAATTGGCAATGATCAAATTTACAACGTTATTGTTACAGCACATGCTTTCATTATAATTTTCTTCATAGTTATACCAATTATAATTGGGGGATTTGGTAATTGACTTGTCCCCCTTATATTAGGAGCACCTGATATAGCTTTTCCACGAATAAACAATATAAGATTTTGATTTTTACCCCCATCTCTTTCTCTTTTATTAATAAGAAGAATTGTAGAAAATGGGGCAGGTACAGGTTGAACAGTATATCCTCCTCTTTCAGCTAATATTGCCCATAGAGGATCATCTGTTGATTTAGCAATTTTTAG…
RRSSC6176-15	BOLD:AAB0974	Hymenoptera	Halictidae	Halictinae	Agapostemon	AACTTTATATTTTTTATTTGGAACATGAGCAGGAATAGTAGGAACATCTCTAAGAATTTTAATTCGAGCAGAATTAGGTCATCCTGGAGCCCTAATTGGTGACGATCAAATTTATAATGTAATTGTTACTGCTCATGCCTTCGTAATAATTTTTTTTATAGTAATACCAATTATAATTGGAGGATTTGGAAATTGATTAGTTCCATTAATATTAGGAGCCCCTGATATAGCTTTTCCTCGAATAAATAATATAAGTTTCTGATTATTACCTCCTTCTTTAACTTTATTATTAGTAAGAAGAATAGTAGAAAATGGAGCTGGGACAGGATGAACAGTTTATCCACCTTTATCTGCTAATATTGCTCATAGTGGAGCTTCTGTTGATTTAGCAATTTTTTC…
RRMPE003-15	BOLD:AAE1629	Coleoptera	Cerambycidae	Cerambycinae	Neoclytus acuminatus	TACTTTATATTTTATCTTAGGTGCTTGATCTGGAATAATTGGTACTTCATTAAGTATTTTAATTCGAGCTGAATTAGGACATCCTGGAGCATTAATTGGAGATGATCAAATTTATAATGTAATTGTAACAGCTCATGCTTTTATTATAATTTTTTTTATAGTTATACCAATTATAATTGGTGGATTTGGAAACTGATTAGTCCCATTAATATTAGGAGCACCAGATATAGCTTTTCCACGAATAAATAATATAAGTTTCTGATTATTACCTCCTGCATTAACTTTATTATTAGTGAGTAGTATAGTAGAAAATGGTTCTGGTACAGGATGAACAGTTTATCCTCCTTTATCTTCTAATATTGCTCATGGAGGAGCTTCTGTAGATTTAGCTATTTTTTC…
RRGCO623-15	BOLD:AAA3817	Lepidoptera	Geometridae	Larentiinae	Xanthorhoe ferrugata	AACATTATATTTTATTTTTGGACTTTGAGCTGGAATAATTGGTACATCTTTAAGATTAATAATTCGATTAGAATTAGGAACACCATCTTCAATTATTAATAATGATCAATTTTATAATTCAATTATTACAGCCCATGCTTTAGTAATAATTTTTTTTATAGTTATACCATTTATAATTGGAGGTTTTGGAAATTGATTAATTCCTATAATACTTGGAGCCCCTGATATAGCTTTCCCACGAATAAATAATATAAGATTTTGACTTTTACCACCCTCATTATTTTTGCTTATTATAAGAAACATAATAAAAATAGGAGTAGGAACAGGATGAACTTTATACCCACCTTTATCTTCAAATATTGGACATAATTCACCTTCTGTTGATTTATCAATTTTTTC…
RRMFD011-15	BOLD:AAG9897	Dermaptera	Forficulidae	Forficulinae	Forficula auricularia-A	AACATTATATTTTATATTTGGATCGTGGGCTGGAATAGTAGGAACTTCATTAAGATTATTAATTCGAGCCGAACTAGGTAACCCGGGAACTTTAATTGGGGATGATCAAATTTATAACGTTATTGTTACAGCTCATGCTTTCATTATAATTTTTTTTATGGTTATACCGATTTTAATTGGGGGATTTGGGAACTGATTGGTTCCTTTAATATTAGGGGCCCCTGATATAGCCTTCCCACGTATAAATAATATAAGATTTTGATTACTGCCTCCTTCTTTAACCTTATTATTAATAAGAAGAATAGTAGAAAGAGGGGCAGGAACCGGATGAACTGTTTATCCTCCTTTATCTTCTAATATTGCTCATAGGGGGGCTTCAGTTGATTTAGCTATTTTTAG…
RRSSC4775-15	BOLD:AAG2877	Hemiptera	Cicadellidae	Cicadellinae	Cuerna	AACTTTATATTTTATTTTTGGAGCATGATCAGGAATAATTGGTACTTCCTTAAGAATTTTGATTCGTACTGAATTAGGTCATTCTGGTTCTTTAATTGGAAATGATCAAATTTATAATGTAATTGTTACAGCTCATGCTTTTGTAATAATTTTTTTTATAGTAATACCTATTATAATTGGAGGATTTGGAAATTGATTAGTTCCATTAATATTAGGAGCTCCAGATATAGCTTTTCCACGAATAAATAATATAAGTTTTTGATTACTTCCTCCTGCTTTAATTCTTTTATCTTCGAGAGGAATAATAGATAATGGAGCTGGTACTGGTTGAACTGTTTACCCTCCTTTATCTTCTCTTATTTCTCATGATGGATCTTCTGTAGATTTAGCAATTTTTTC…
RRMFG2308-15	BOLD:AAH0127	Coleoptera	Pyrochroidae	Pedilinae	Pedilus	AACGTTGTACTTTTTATTTGGAAGATGAGCTGGAATAGTAGGAACCTCACTAAGAATTTTAATTCGGGCCGAATTAGGAAATCCAGGTAGATTAATTGGTGATGATCAAATTTATAATGTTATTGTTACAGCCCATGCATTCGTAATGATTTTTTTCATAGTAATGCCTATTTTAATTGGAGGCTTTGGAAATTGACTAGTACCCCTCATACTAGGAGCTCCTGACATAGCCTTCCCTCGAATAAACAACATAAGATTCTGATTATTACCTCCTTCTCTAACATTACTTCTAAGCAGAAGATTAGTAGAAAGAGGAGCAGGAACTGGTTGAACAGTTTATCCCCCTCTTTCAGCAAATATTGCCCATAGAGGAGCATCAGTTGATTTGGCCATTTTCAG…
RRMFG2636-15	BOLD:AAC2266	Diptera	Sciomyzidae	Sciomyzinae	Tetanocera plumosa	AACTTTATATTTCATTTTTGGTATTTGGGCAGGAATAGTAGGAACTTCTTTAAGATTATTAATTCGAGCTGAATTAGGAAATCCGGGATATTTAATTGGGGATGATCAAATTTATAATACTATTGTTACAGCTCATGCTTTTATCATAATTTTTTTTATAGTTATACCTATTATAATTGGGGGATTTGGTAATTGATTAGTACCTCTAATATTAGGAGCCCCAGATATGGCTTTCCCACGAATAAATAATATAAGATTTTGATTATTACCCCCCTCCCTTTCCCTTTTAATTTCAAGAAGAATTGTTGAAAATGGGGCAGGAACTGGATGAACAGTATATCCACCCCTCTCCTCTAACATCGCTCATGGGGGAAGATCAGTTGATTTAGCTATTTTCTC…
RRSSA3962-15	BOLD:ACM0139	Coleoptera	Staphylinidae	Oxyporinae	Oxyporus	AACGTTATATTTTATTTTCGGAGCTTGATCAGGAATGGTCGGCACTTCTCTTAGATTACTAATTCGAGCTGAGTTGGGTAACCCCGGCTCATTAATCGGTGACGATCAAATTTATAATACCATCGTAACGGCCCACGCCTTCATTATAATTTTCTTTATGGTCATGCCTATTATAGTAGGAGGATTTGGCAATTGATTAGTGCCCTTAATACTTGGCGCCCCAGATATGGCCTTCCCCCGAATAAACAACATAAGATTTTGATTACTCCCCCCATCTCTCTCTCTCTTACTTATAAGAAGAGTGGTAGAAAGGGGGGCAGGAACTGGATGAACCGTTTATCCCCCCCTATCATCCAACATTGCCCATGGAGGATCCTCAGTCGATTTAGCTATTTTCAG…
RRGCO428-15	BOLD:AAB4321	Lepidoptera	Gelechiidae	Gelechiinae	Metzneria lappella	AACGTTATATTTCATTTTTGGTATTTGAGCAGGTATAGTTGGAACTTCTTTAAGATTATTAATTCGAGCAGAACTAGGAAACCCCGGATCATTAATTGGTGATGATCAAATTTATAATACTATTGTAACAGCTCATGCATTTATTATAATTTTTTTTATAGTAATACCTATTATAATTGGAGGATTTGGTAATTGATTAGTACCTTTAATATTAGGAGCCCCAGATATAGCTTTCCCACGAATAAATAATATAAGTTTTTGATTACTACCCCCCTCTATTATACTTTTAATCTCAAGAAGAATTGTTGAAAATGGAGCAGGAACAGGATGAACGGTTTACCCCCCCCTTTCATCTAATATTGCCCATAGCGGAAGTTCTGTTGATTTAGCTATTTTCTC…
RRGCO600-15	BOLD:AAA5383	Lepidoptera	Geometridae	Sterrhinae	Scopula inductata	AACATTATATTTTATTTTTGGAATTTGAGCTGGTATAGTTGGTACTTCATTAAGACTATTAATTCGAGCTGAATTAGGAAATCCAGGATCTTTAATTGGAGATGACCAAATTTATAATACTATTGTCACAGCTCATGCTTTTATTATAATTTTTTTTATAGTTATACCTATTATAATTGGAGGATTTGGTAATTGACTTGTACCTTTAATATTAGGAGCCCCAGATATAGCATTTCCTCGAATAAATAATATAAGTTTTTGACTTCTCCCACCCTCATTAACTTTATTAATTTCAAGAAGAATTGTAGAAAGTGGAGCAGGAACAGGATGAACAGTTTATCCACCCCTTTCATCTAATATTGCCCATGGAGGAAGATCTGTTGATTTAGCTATTTTTTC…
RRMPC946-15	BOLD:AAA5695	Trichoptera	Hydropsychidae	Hydropsychinae	Cheumatopsyche	AACTCTTTATTTTTTATTTGGGATCTGATCAGGTATAGTAGGTATAATATTAAGAATAATTATTCGAATTGAATTAGCTCAGCCAGGACCATTTTTAATAAATGATCAACTTTATAATGTAATTGTAACTTCACATGCTTTTATTATGATTTTTTTTATGGTTATACCAATCATAATTGGTGGATTTGGGAATTGATTATTACCTTTAATAATTGGTGCACCAGATATAGCATTTCCTCGTATAAATAATATAAGATTTTGATTACTACCTCCATCACTATGTTTATTATTAGTTAGATCTATAGTTGAAATAGGAGTTGGAACCGGTTGAACAGTTTATCCTCCTTTATCGTCAAATGTTGCACATTCTGGTCCTAGAGTTGATTTAGCAATTTTTTC…
RRSSC2097-15	BOLD:AAD8954	Diptera	Syrphidae	Eristalinae	Lejops lunulatus	TATTTTATATTTTTTGTTTGGGATATGAGCGGGGATAATTGGTATATCAATGAGTTTAATTATTCGTTTAGAGTTAGGAGTGTGTGGGAGAATGTTGGGGAATGAACAAATTTATAATGGTATAGTAACTTTACATGCGTTTGTAATAATTTTTTTTATAGTAATACCTATTATAATTGGGGGGTTTGGTAATTGATTAATCCCTTTAATATTAGGGGCTCCTGACATAGCTTTTCCTCGTATGAATAATATGAGGTTTTGATTATTGATTCCTTCATTGTTATTATTATTGATTAGAGGTTTAATTAATGTAGGGGTAGGGACTGGATGAACAATATATCCTCCTTTATCTTCTTTAATAGGGCATAGAGGTATATCAGTTGATTTATCTATTTTTTC…
RRGCO802-15	BOLD:AAA7906	Trichoptera	Phryganeidae	Phryganeinae	Phryganea cinerea	TACTTTATATTTTATTTTTGGAGCTTGATCAGGAATAATTGGTACTTCATTAAGTATTTTAATTCGTACTGAATTAGGCCATCCTGGTTCATTAATTGGAAATGATCAAATCTATAATGTTATTGTAACAGCTCACGCTTTTATTATAATTTTTTTTATAGTAATACCTATTATAATTGGAGGATTTGGAAATTGATTAGTGCCACTAATATTAGGAGCCCCAGATATAGCATTTCCACGAATAAATAATATAAGTTTTTGACTTCTCCCTCCCTCATTAACTCTTCTATTAATAAGTAGTATAGTAGAAAACGGAACTGGTACAGGTTGAACAGTTTACCCACCCCTGTCATCTATCATTGCTCATAGAGGTGCTTCTGTTGATTTAGCAATTTTTTC…
RRSSC4113-15	BOLD:AAC7655	Hymenoptera	Halictidae	Halictinae	Sphecodes ranunculi	AACATTATATTTTATCTTCGGGGCATGAGCCGGAATAGTAGGAACTTCTTTGAGAATTTTAGTTCGAGCTGAATTAGGGCACCCCGGAGCTTTAATTGGAGATGACCAAATCTATAATGTAATTGTTACTGCTCACGCATTTATTATAATTTTCTTTATAGTAATACCCATTATAATTGGGGGATTTGGTAATTGATTAGTCCCTCTAATATTAGGGGCCCCTGATATGGCTTTCCCACGAATAAATAATATAAGTTTTTGAATACTTCCCCCCTCTTTATCTCTTCTATTAACTAGTTCAATAGTTGAAAATGGAGCAGGAACAGGATGAACAGTTTACCCCCCTCTTTCAGCAAGAATTGCCCACGGTGGGGCATCTGTCGATTTAGCTATCTTCTC…
RRGCO746-15	BOLD:AAB3840	Lepidoptera	Tortricidae	Tortricinae	Thyraylia hollandana	AACGTTATATTTTATTTTTGGTGTTTGAGCTGGAATAATTGGTACTTCCTTAAGATTATTAATTCGAGCAGAATTAGGAAATCCTGGCTCATTAATTGGAGATGATCAAATTTATAATACTATTGTAACTGCCCATGCTTTTATTATAATTTTTTTTATAGTTATACCCATTATAATTGGTGGTTTTGGTAATTGATTAGTACCATTAATATTAGGAGCTCCTGATATAGCTTTCCCACGAATAAATAACATAAGATTTTGATTATTACCCCCCTCCATCATATTATTAATCTCAAGCAGAATTGTAGAAAATGGAGCAGGAACAGGATGAACAGTTTATCCCCCACTTTCATCAAATATTGCCCATAGTGGCAGATCTGTAGATCTTGCTATTTTTTC…
RRSSC2088-15	BOLD:AAW3517	Orthoptera	Tettigoniidae	Tettigoniinae	Metrioptera roeseli	AACTTTATATTTTATATTTGGATCTTGATCTGGAATAGTAGGAACATCTCTAAGAATTTTAATTCGATCAGAATTAGGTCATCCTGGAGCTTTAATTGGCGATGATCAAATTTATAATGTAATTGTAACAGCTCATGCCTTTGTAATAATTTTTTTTATAGTAATGCCTATTATAATTGGAGGATTTGGTAACTGATTAGTTCCATTAATATTAGGAGCTCCAGATATAGCATTTCCACGAATAAATAATATAAGTTTTTGATTATTACCCCCATCATTGACCCTATTAATAGCAAGAATAATAGTTGAAAACGGATCTGGTACAGGATGAACGATTTACCCACCTTTATCTTCAGCTATTGCACATGGCGGATCTTCTGTAGATCTTACAATTTTCTC…
RRSSA263-15	BOLD:AAA2528	Trichoptera	Hydropsychidae	Hydropsychinae	Hydropsyche sparna	TACTTTATATTTTATTTTCGGAGCATGAGCTGGAATGGTGGGTACTTCATTAAGAATGCTAATTCGAGCTGAACTAGGGCATCCAGGAGCTTTAATTGGAGATGATCAAATTTATAATGTAATTGTTACAGCACATGCCTTTGTAATAATTTTTTTTATAGTAATACCCATTATAATTGGAGGATTTGGTAACTGATTAGTTCCTTTAATGTTAGGGGCCCCAGATATAGCATTTCCACGAATAAATAATATAAGATTTTGATTACTACCCCCATCTTTAACCCTATTATTAGCAAGAAGTATAGTAGAAAATGGAGCAGGAACTGGTTGAACAGTATACCCCCCGCTATCTGCCAGAATTGCGCATGCTGGAGCTTCTGTTGACTTAGCAATTTTTTC…
RRSSC3242-15	BOLD:AAF3704	Hemiptera	Artheneidae	Artheneinae	Chilacis typhae	TACATTATATTTTCTATTTGGAGCTTGAGCTGGAATAGTAGGAACATCTTTAAGTATTTTAATTCGTGCAGAACTTGGTCATCCAGGAGCATTAATTGGTGATGATCAAATTTATAATGTAATTGTTACTGCTCATGCATTTGTAATAATTTTTTTTATAGTAATACCTATTATAATTGGTGGATTTGGTAATTGATTAGTTCCTTTAATATTAGGAGCTCCTGATATAGCATTTCCTCGAATAAATAATATAAGTTTTTGATTATTACCCCCTTCATTAACACTACTTTTAGTAAGTAGTATAGTTGAAAATGGGGCTGGAACTGGATGAACAGTTTATCCTCCTCTTTCTGCTAGAATTGCACATGGAGGAGCATCAGTTGATTTAGCAATTTTTTC…
RRSSC1952-15	BOLD:AAA3080	Trichoptera	Limnephilidae	Leptocerinae	Limnephilus submonilifer	TACTTTATATTTTATTTTTGGAATTTGAAGAGGAATAGTAGGAACATCTTTAAGACTTCTAATTCGTGCTGAATTAGGAAATCCAGGATCATTAATTGGAGATGATCAAATTTATAATACAATTGTAACAGCTCATGCATTTATTATAATTTTTTTTATAGTTATACCTATTATAATTGGAGGATTTGGAAATTGATTAGTCCCTCTTATATTAGGAGCTCCTGATATAGCATTCCCACGAATAAATAATATAAGATTTTGATTATTACCCCCATCATTAACTCTTTTAATTTCAAGAAGAATTGTTGAAAATGGAGCAGGAACTGGGTGAACAGTTTATCCCCCCCTTTCATCAAATATTGCTCATGGTGGTAGATCAGTTGATTTAGCAATTTTTTC…
RRGCO243-15	BOLD:AAB5494	Lepidoptera	Pyralidae	Pyralinae	Aglossa cuprina	AACTTTATATTTTATTTTTGGAATTTGAGCTGGAATAATTGGAACATCTTTAAGATTACTAATTCGAGCTGAATTAGGAAATCCCGGATCTTTAATTGGAGATGATCAAATTTATAATACTATTGTAACAGCACATGCCTTTATTATAATTTTTTTTATAGTTATACCTATTATAATTGGAGGATTTGGAAATTGATTAGTCCCATTAATATTAGGAGCCCCAGATATAGCATTTCCCCGAATAAATAATATAAGATTTTGATTACTCCCCCCTTCAATCACTCTTTTAATTTCAAGAAGAATTGTAGAAAATGGAGCTGGGACTGGTTGGACAGTTTACCCCCCTTTATCCTCTAATATTGCCCACGGAGGAAGATCTGTAGATTTAGCTATTTTCTC…
RRGCO574-15	BOLD:AAB7492	Lepidoptera	Pterophoridae	Pterophorinae	Adaina montanus	AACTTTATATTTTATTTTCGGAATTTGAGCTGGTATAGTAGGAACATCATTAAGTTTAATAATTCGTGCTGAATTAGGTAACCCTGGATCACTAATTGGTGACGATCAAATTTATAATACTATTGTAACGGCTCATGCTTTCATTATAATTTTTTTTATGGTAATACCAATTATAATTGGAGGATTTGGTAATTGATTAGTTCCTTTAATGTTAGGAGCTCCTGATATAGCTTTCCCTCGAATAAATAATATAAGATTCTGATTACTTCCTCCATCAATTACATTATTAATTTCAAGAAGAATTGTTGAAAATGGAGCAGGAACTGGATGAACAGTTTACCCCCCCTTATCCTCAAATATTGCTCATGGAGGAAGATCTGTAGATTTAGCTATTTTCTC…
RRGCO742-15	BOLD:AAC4337	Lepidoptera	Nepticulidae	Nepticulinae	Nepticulinae	AACATTATATTTTATTTTTGGGATTTGAGCTGGAATAGTAGGAACTTCTCTAAGATTATTAATTCGAGCTGAATTAGGAAACCCTGGATCATTAATTGGAGATGATCAAATTTATAATACTATTGTTACTGCTCATGCTTTTATTATAATTTTTTTTATAGTAATACCAATTATAATTGGAGGATTTGGAAATTGATTAGTACCATTAATATTAGGAGCCCCAGATATAGCTTTTCCACGTATAAATAATATAAGATTTTGATTACTTCCCCCCTCTATTATATTATTAATTTCAAGAAGAATTGTAGAAAATGGAGCAGGAACAGGATGAACAGTTTACCCCCCACTTTCATCTAATATTGCTCATAGAGGAAGATCAGTAGATTTAGCTATTTTTTC…
RRMFE3104-15	BOLD:ADL0161	Diptera	Tachinidae	Exoristinae	Cryptomeigenia	AACATTATATTTTATTTTTGGAGCTTGAGCCGGAATAGTTGGAACTTCTCTAAGTATACTAATTCGAGCTGAATTAGGTCATCCTGGTGCCTTAATTGGTGATGATCAAATTTATAATGTTATTGTAACAGCTCATGCTTTTGTTATAATTTTTTTTATAGTAATACCTATTATAATTGGAGGATTTGGAAATTGATTAGTTCCTTTAATATTAGGAGCCCCAGATATAGCCTTTCCTCGAATAAATAATATAAGATTTTGACTACTGCCCCCTTCTTTAACATTATTACTAGCTAGAAGTCTGGTAGAAAACGGAGCTGGGACTGGGTGAACTGTTTATCCTCCTTTATCGGCTGGAATTGCACATGCGGGAGCATCAGTTGATTTAGCTATTTTTTC…
RRSSA4300-15	BOLD:AAG2462	Diptera	Anthomyiidae	Anthomyiinae	Botanophila fugax	TCTACTTTATTTTATCTTTGGATTATGATCAGGAATAATTGGATCTGCTTTAAGAATAATTATTCGATTAGAACTTGGAATACCAGGAAAACTTATTAATAATGATCAAATTTATAATACTATTGTAACCTCCCATGCATTTATTATAATTTTTTTTATAGTTATGCCATTTATAATTGGAGGATTTGGTAATTGATTAATTCCCCTAATACTTGCAGCTCCTGATATAGCTTTTCCACGTATAAATAATATAAGATTTTGACTTTTACCTCCTTCTTTATTTATACTATTGATAAGTAATATCATTGGTAGAGGAGTAGGTACTGGATGAACCTTATACCCTCCTTTATCTTCAATTTTAGGTCATAATTCTCCATCAGTTGATTTAAGTATCTTTTC…
RRSSA2278-15	BOLD:AAE5359	Coleoptera	Cerambycidae	Lepturinae	Neoalosterna capitata	AACTTTATACTTCATTTTCGGAGCATGATCTGGAATAATTGGTACTTCACTAAGTATTTTAATTCGAACTGAATTAGGACATCCAGGTTCATTAATTGGTGATGATCAAATTTATAATGTAATTGTTACAGCACATGCATTTATTATAATTTTTTTTATAGTAATACCAATTATAATTGGAGGATTCGGAAATTGATTAGTTCCTTTAATATTAGGAGCTCCAGATATAGCATTCCCACGAATAAACAATATAAGTTTTTGACTACTTCCCCCTTCATTAACGCTTTTATTAGCAAGTAGTATAGTAGAAAACGGAGCTGGGACAGGATGAACAGTTTACCCACCTTTATCTTCAGTGATTGCTCATGGAGGAGCTTCTGTAGATTTAGCAATTTTTTC…
RRSSC4823-15	BOLD:AAG6756	Diptera	Sarcophagidae	Sarcophaginae	Boettcheria cimbicis	AACATTATATTTTTTATTTGGAACTTGAGCCGGAATAGTAGGAACTTCTTTAAGAGTTTTAATTCGTGCAGAACTTGGTCATCCAGGAGCTTTAATTGGTGATGATCAAATTTATAATGTAATTGTTACTGCTCATGCTTTTGTTATAATTTTTTTTATAGTAATACCAATTATAATTGGAGGATTTGGTAATTGATTAGTGCCCTTAATATTAGGAGCTCCAGATATAGCTTTTCCTCGAATAAATAATATAAGTTTTTGATTATTACCTCCTTCTTTAACATTATTATTAATAAGCAGAATAGTAGAAAATGGGGCTGGAACAGGATGAACAGTTTACCCTCCCCTTTCTGCAAGAATTGCTCATAGAGGAGCTTCTGTTGATTTAGCAATTTTTTC…
RRSSA262-15	BOLD:AAA3892	Trichoptera	Hydropsychidae	Hydropsychinae	Cheumatopsyche campyla	AACTTTATATTTCATTTTTGGTGCTTGATCAGGAATAATTGGAACTTCAATAAGAATTTTAATTCGTTCAGAATTAGGAAATCCAGGTTCACTAATTGGAGATGATCAAATTTATAATGTAATTGTTACAGCTCACGCTTTTATTATAATTTTTTTTATAGTTATACCTATTATAATAGGAGGATTTGGAAATTGATTAGTACCTCTTATACTAGGAGCTCCAGATATAGCTTTCCCTCGAATAAATAATATAAGATTTTGACTACTCCCCCCTTCACTTTCTTTATTATTAATAAGAAGATTTGTTGAAAATGGGGCAGGAACTGGATGAACTGTTTACCCCCCTTTATCATCTAATATTGCTCATAATGGACCTTCAGTAGATTTAACTATTTTTAG…
RRMFE3134-15	BOLD:AAG6647	Diptera	Bibionidae	Bibioninae	Bibioninae	AACTTTATATTTTATCTTCGGAATTTGATCAGGAATAATTGGAACTTCCTTAAGAATCCTAATTCGAACAGAACTAGGACATCCAGGAGCATTAATTGGAGATGATCAAATTTATAATGTAATTGTAACAGCTCATGCTTTTATTATAATTTTCTTTATAATTATACCAATTATAATTGGAGGATTTGGAAATTGATTAGTCCCTTTAATATTAGGAGCTCCAGATATAGCATTCCCCCGAATAAATAATATAAGTTTTTGATTGTTACCACCAGCATTAACTTTATTATTAGTGAGTAGTATAGTAGAAAACGGAGCTGGGACAGGATGAACTGTTTACCCTCCCCTATCCTCTAATATTGCTCATGGAGGAGCTTCTGTTGATTTAGCTATTTTTTC…
RRSSC4998-15	BOLD:AAA2322	Hymenoptera	Halictidae	Halictinae	Lasioglossum leucozonium	AACATTATATTTTATTTTTGGTATTTGAGCCGGAATAGTAGGAACCTCTTTAAGATTACTTATTCGAGCTGAATTAGGTAATCCTGGTTCCTTAATTGGAGATGATCAAATTTATAATACTATTGTCACAGCTCATGCTTTCATTATAATTTTTTTTATAGTTATACCTATTATAATTGGAGGATTTGGAAATTGACTTGTACCTTTAATATTAGGGGCCCCAGATATAGCTTTTCCTCGAATAAATAATATAAGTTTTTGACTTCTTCCCCCCTCTTTAACTTTATTAATTTCAAGTAGAATTGTAGAAAATGGGGCAGGAACAGGATGAACAGTTTATCCCCCACTTTCTTCTAACATTGCTCATGGCGGAAGATCTGTTGATTTAGCTATTTTTTC…
RRSSC6131-15	BOLD:AAA8933	Coleoptera	Coccinellidae	Coccinellinae	Coccinella septempunctata	AACATTATACTTCATTTTTGGTATTTGAGCTGGAATAGTTGGAACTTCTCTAAGTTTATTAATTCGAGCTGAATTAGGTAATCCAGGATCATTAATTGGGGATGACCAAATTTATAATACAATTGTAACAGCACATGCTTTTATTATAATTTTTTTTATGGTTATACCAATTATAATTGGGGGATTTGGTAATTGATTGGTTCCACTAATATTGGGAGCACCTGATATAGCTTTTCCCCGTATAAATAATATAAGATTTTGATTATTACCACCATCAATCACTCTTTTAATTTCTAGAAGAATTGTAGAAAATGGAGCAGGAACAGGATGAACTGTTTACCCTCCTTTATCTTCAAATATTGCTCATGGGGGAAGTTCGGTAGATTTAGCTATTTTTTC…
RRGCO736-15	BOLD:AAA3308	Lepidoptera	Tortricidae	Olethreutinae	Endothenia hebesana	AACATTATATTTTATTTTTGGTATTTGAGCTGGAATAGTAGGAACTTCTTTAAGATTATTAATTCGAGCTGAATTAGGAAATCCTGGCTCATTAATTGGAGATGACCAAATTTATAATACTATTGTAACGGCTCATGCTTTTATTATAATTTTTTTTATAGTTATACCTATTATAATTGGAGGATTCGGAAATTGATTAGTACCTTTAATATTAGGAGCTCCTGATATAGCTTTCCCACGAATAAATAATATAAGTTTTTGACTTTTACCACCTTCTTTAACATTATTAATTTCAAGAAGAATTGTAGAAAATGGAGCAGGAACAGGATGAACAGTTTACCCCCCACTTTCATCTAATATTGCACATGGTGGTAGATCAGTTGATTTAGCAATTTTTTC…
RRGCO738-15	BOLD:AAB2093	Lepidoptera	Tortricidae	Olethreutinae	Phaneta tomonana	AACATTATACTTTATTTTTGGAATTTGAGCAGGTATAGTAGGAACTTCCCTAAGATTATTAATTCGAGCTGAATTAGGAAATCCTGGATCATTAATTGGAAGAGATCAAATTTATAATACAATTGTAACTGCACATGCTTTTATTATAATTTTTTTTATAGTCATACCTATTATAATCGGAGGATTTGGAAATTGACTAGTACCATTAATATTAGGAGCTCCTGATATAGCTTTTCCCCGAATAAATAATATAAGATTTTGATTATTACCCCCATCACTAATTCTTCTAATTTCAAGAAGTATTGTAGATAATGGAGCCGGTACTGGATGAACGGTTTACCCCCCCCTTTCTTCCAATATTGCTCATAGAGGTAGATCAGTTGATTTAGCAATTTTCTC…
RRGCO757-15	BOLD:AAI2947	Lepidoptera	Gracillariidae	Lithocolletinae	Phyllonorycter	AACATTATATTTTATTTTTGGAATTTGAGCAGGTATAGTAGGAACTTCTCTAAGATTGTTAATTCGAGCAGAATTAGGAAATCCTGGATCTTTAATTGGAGATGATCAAATTTATAATACTATTGTTACAGCACATGCTTTTATTATAATTTTTTTTATAGTTATACCAATTATAATTGGAGGATTTGGAAATTGATTAGTTCCATTAATATTAGGAGCTCCAGATATAGCATTTCCTCGAATAAATAATATAAGATTTTGACTTCTACCCCCATCATTAACTTTATTAATTTCGAGAAGAATTGTAGAAAATGGAGCAGGAACCGGATGAACAGTATATCCTCCACTATCTTCTAATATTGCTCACGGTGGAAGTTCAGTAGATTTAGCAATTTTTTC…
RRSSC7841-15	BOLD:ABY8689	Diptera	Limoniidae	Limoniinae	Rhipidia lecontei	AACCTTATATTTTATTTTTGGTGCTTGATCTGGTATAGTAGGAACATCCCTGAGACTATTAATTCGAGCTGAATTAGGTCAACCAGGTGCTTTAATTGGTGACGATCAAATTTTTAATGTTATTGTAACAGCTCATGCTTTTGTCATAATTTTCTTTATAGTTATGCCAATTTTAATTGGAGGATTTGGAAATTGATTAGTGCCCCTAATATTGGGAGCTCCTGATATAGCTTTTCCTCGAATAAATAATATGAGATTCTGACTTTTACCTCCTTCTTTAACTTTATTACTTACTAGCTCTTTAGTTGAAAACGGAGCTGGGACAGGTTGAACTGTCTACCCCCCTCTATCTTCAACTATTGCTCATGCTGGGGCTTCAGTAGACTTAGCTATTTTTTC…
RRMFE2524-15	BOLD:AAN8263	Hemiptera	Membracidae	Smiliinae	Cyrtolobus	AATTTTATATTTTATTTTTGGCATATGAGCAGGTATAATTGGATCATCAATAAGAATTATCATTCGAATAGAATTAGGTAATCCTGGATTCTTAATTAATAATGATCAAATTTATAATTCTATTGTCACAGCCCATGCATTTATTATAATCTTCTTCATAGTAATACCCATTATAATTGGTGGTTTTGGTAATTGATTAATTCCTTTAATAATTGGCGCACCTGATATAGCTTTCCCACGAATAAATAATATAAGATTCTGACTATTACCCCCATCTTTATTATTATTATTACTTAGAAGAATTATTAATCAAGGAATTGGTACAGGATGAACTGCCTATCCACCATTATCATTAAATATAAATCATGAAGGAATATCAATAGATATAGGAATTTTTTC…
RRSSC1991-15	BOLD:AAB4175	Lepidoptera	Nymphalidae	Satyrinae	Megisto cymela	TACTTTATATTTTATTTTTGGTGCATGATCAGGAATAGTAGGGACTTCATTAAGTATATTAATTCGAGCTGAATTAGGAAATCCTGGATCATTAATTGGTGACGATCAAATTTATAATGTTATTGTTACTGCTCATGCATTTGTTATAATTTTCTTTATAGTAATACCTATTATAATTGGAGGGTTTGGGAATTGACTAGTTCCATTAATATTAGGAGCTCCTGATATGGCTTTTCCTCGAATAAATAATATAAGATTTTGACTTTTACCTCCATCTTTATCATTACTGTTAATAAGTTCTTTAGTTGAAAGAGGTGCTGGTACTGGATGAACAGTGTACCCTCCTTTATCTTCAGGTATTGCCCATAGAGGAGCTTCTGTAGATCTAGCAATTTTTAG…
RRSSC6593-15	BOLD:AAZ0388	Coleoptera	Staphylinidae	Staphylininae	Quedius curtipennis	AACTTTATATTTCATTTTTGGAGCTTGATCCGGAATAATTGGAACTTCATTAAGAATTTTAATTCGAACTGAATTAGGACACCCAGGAGCTTTAATTGGAGATGACCAAATTTATAATGTAATTGTAACAGCTCATGCTTTTATTATAATTTTTTTTATAGTTATACCTATTATAATTGGTGGATTTGGAAATTGATTAGTACCCCTAATACTAGGAGCTCCAGATATAGCATTCCCTCGAATAAATAATATAAGATTTTGACTTTTACCCCCCGCTTTAATTCTATTATTATTTAGTAGAATAGTAGAAAATGGGGCTGGAACAGGATGAACTGTTTATCCACCTCTATCTTCTAATATTGCTCATAGAGGAGCTTCCGTTGATTTAGCTATTTTTTC…
RRSSC1975-15	BOLD:ACU3316	Diptera	Stratiomyidae	Stratiomyinae	Odontomyia pubescens	AACATTATACTTTATTTTTGGGGCTTGAGCAGGAATAGTAGGAACTTCTTTAAGAATTTTAATTCGAGCAGAATTAGGGCACCCTGGAGCATTAATTGGTGACGATCAAATTTATAATGTGATTGTTACAGCTCATGCATTTATTATAATTTTTTTTATAGTTATACCTATTATAATTGGAGGGTTTGGAAATTGATTAGTTCCTTTAATATTAGGAGCTCCTGATATAGCCTTTCCTCGAATAAATAATATGAGATTCTGAATATTACCTCCATCTATTACTTTATTGGTATCTAGAAGTTTAGTTGAAACAGGAGCAGGAACAGGTTGAACAGTATATCCCCCACTTTCATCTGGAATTGCTCATGCTGGAGCATCTGTAGATTTAGCAATTTTCTC…
RRSSA4315-15	BOLD:AAG4431	Coleoptera	Chrysomelidae	Donaciinae	Donacia cincticornis	TACTTTATATTTTATTTTTGGGGCATGAGCAGGAATAGTTGGGACTTCTCTTAGATTACTAATTCGAGCCGAACTAGGACATCCTGGGGCTTTAATTGGAGATGATCAAATTTATAATGTTATTGTTACAGCTCATGCTTTTGTAATAATTTTTTTTATAGTAATACCCATTATAATTGGGGGATTTGGAAATTGACTTGTGCCTTTAATACTAGGAGCCCCAGATATAGCCTTCCCTCGAATAAATAATATAAGATTTTGATTATTACCCCCTTCATTAACTTTACTACTAGCAAGTAGTATAGTTGAAGCCGGGGCAGGAACTGGATGAACTGTTTACCCTCCTTTATCTGCTAATATTGCTCATGCTGGGGCATCAGTTGATTTAGCTATTTTTTC…
RRSSC4778-15	BOLD:AAG8758	Hemiptera	Cicadellidae	Cicadellinae	Draeculacephala antica	GATCCTGTACATAATTTTTGCACTATGATCAGGAATAGTGGGATCAAGAATATCTATGATTATTCGTATAGAATTAAGTGTACCAGGTGCATGAATTAAAAATGATCAAATTTATAATTCAATTGTTACATCTCATGCATTTTTAATAATTTTTTTTTTAGTTATACCATTTATAATTGGGGGTTTTGGAAACTGATTAATACCATTAATAATTGGTGCACCTGATATAGCTTTCCCTCGAATAAATAATGTAAGATTTTGATTACTCCCTCCATCATTAATCTTACTATTATCAAGAAATTTAATCAACCCAAGACCAGGAACTGGTTGAACTGTATACCCTCCATTATCATTATATATATTTCACCCCTCACCTTCTGTTGATATAACAATTTTTTC…
RRGCO442-15	BOLD:AAA9812	Lepidoptera	Tortricidae	Olethreutinae	Rhopobota naevana	CACCTTATATTTTATCTTTGGAGCATGGGCTGGTATAGTAGGAACTTCTATAAGAATAATTATTCGAGCAGAATTAGGTCAACCAGGATCTCTAATTGGGGATGATCAAATTTACAATGTAATTATTACAGCACACGCATTTGTAATAATTTTTTTTATAGTTATACCTATTATAATTGGAGGATTTGGTAATTGACTTGTACCACTAATAATTGGAGCACCAGATATAGCATTTCCACGAATAAATAATATAAGTTTTTGACTTTTACCACCATCATTAACCCTTTTACTTTCATCTTCTATAGTAGATAGTGGAGCTGGCACAGGATGGACAATTTACCCTCCGCTTGCTGGAGCAATTGCGCACGGAGGTGCATCAGTTGATTTAGCTATTTTCTC…
RRMFG2653-15	BOLD:AAE2739	Lepidoptera	Sesiidae	Sesiinae	Synanthedon acerrubri	AACCTTATACTTTATTTTTGGCGCTTGGGCCGGAATAATTGGAACCTCTTTAAGAATTTTAATCCGAGCTGAATTGGGACACCCAGGAGCCTTGATTGGAAATGATCAAATCTATAATGTTATTGTAACAGCTCATGCCTTTGTAATAATTTTTTTTATAGTAATACCAATCATAATTGGAGGATTTGGAAATTGACTAGTTCCTCTAATATTAGGGGCCCCTGATATAGCATTCCCACGAATAAATAACATAAGCTTTTGACTTCTGCCCCCCTCATTAACTCTTTTACTAGCAAGTAGCTTAATCGAAAACGGGGCAGGAACAGGATGAACTGTTTACCCTCCCCTATCTTCTGGAATTGCCCACGCTGGAGCTTCTGTTGATTTAGCTATTTTTTC…
RRSSC7818-15	BOLD:ABA5202	Diptera	Limoniidae	Limnophilinae	Pseudolimnophila luteipennis	AACTCTATATTTCATTTTTGGAGCCTGATCAGGAATAGTAGGAACTTCTTTAAGACTATTAATTCGATCTGAGTTAGGTACACCAGGAACATTAATTGGTAACGACCAAATTTATAATGTAATTGTTACTGCTCATGCATTTATTATAATTTTTTTTATAGTTATACCTATTATAATTGGAGGATTTGGTAATTGACTTGTTCCTTTAATATTAGGAGCTCCTGATATAGCTTTTCCTCGAATAAATAATATAAGATTTTGATTATTACCTCCTTCACTAACTTTACTTTTAATAAGAAGAATAGTAGAAAGAGGAGCTGGCACAGGATGAACTGTTTATCCCCCATTATCTTCTAATATTGCTCATGGAGGATCATCCGTAGATTTAGCTATTTTCAG…
RRMFE3097-15	BOLD:AAG6654	Diptera	Bibionidae	Bibioninae	Bibio	AATTTTATATTTTATTTTTGGAATATGATCAGGAATAATTGGATCATCAATAAGTATTATTATTCGAATAGAATTAAGAAATCCAGGATTTCTTATTAATAATGATCAAATTTATAATTCAATTATTACAACTCATGCCTTTATTATAATTTTTTTTATAGTTATACCAATTATAATTGGTGGATTTGGAAACTGATTAATTCCTTTAATAATAGGAGCCCCTGATATAGCATTTCCCCGAATAAATAATATAAGATTTTGACTTTTAATTCCTTCTATTATATTATTAATATTAAGATCAATTTCAAATCAAGGAACAGGAACAGGATGAACTATATATCCCCCCTTATCTTTAAATTTAAACCATGAAGGAATTTCAATTGATATATCAATTTTTTC…
RRSSA3940-15	BOLD:ACW4252	Hymenoptera	Tiphiidae		Tiphiidae	AACATTATATTTTATATTTGGAATTTGATCAGGAATAGTTGGTACATCACTAAGTTTACTAATTCGAATAGAATTAGGGAATCCAGGATCATTAATTGGTGATGATCAAATTTATAATACAATTGTAACTGCCCATGCTTTTATTATAATTTTTTTTATAGTAATACCAATTATAATTGGTGGATTTGGAAATTGATTAGTACCAATTATATTAGGAGCCCCAGATATAGCATTCCCACGATTAAATAATATAAGATTTTGATTACTACCCCCATCATTAACTTTATTAATTTCAAGAAGAATTGTAGAAACTGGAGTAGGAACAGGATGAACAGTTTACCCCCCTCTTTCTTCTAATATTGCCCACAGAGGAAGATCTGTAGATTTAGCAATTTTTTC…
RRSSC1990-15	BOLD:ACL7238	Diptera	Xylomyidae		Solva	TATATTATATTTTATTTTTGCAATATGAGCTGGGATAATTGGAAGATCTATAAGTATAATTATTCGTACAGAATTAGGAACTCCTAATTCATTTATTAATAATGACCAAATTTACAATTCTTTAGTTACAACCCATGCATTTATCATAATTTTTTTTATAGTTATACCCTTTATAATTGGTGGATTTGGAAATTGATTAGTACCCCTTATATTAGGAGCCCCTGATATAGCGTTTCCGCGAATAAATAATATAAGATTTTGATTATTACCCCCCTCAATTTCTATAATATTAATTAGAAATTTAATTTATGATGGAATCGGAACAGGCTGAACAATTTACCCCCCCCTATCTTCAAACTTATTTCATAATGGACCTACTGTTGATCTTACAATTTTCTC…
RRGCO749-15	BOLD:AAB0650	Lepidoptera	Gelechiidae	Dichomeridinae	Dichomeris	AACACTTTATTTTATTTTTGGGGCTTGAGCTGGAATAATTGGAACATCACTAAGTATTTTAATTCGTGCTGAACTAGGTCACCCAGGAGCTTTAATTGGTGATGATCAAATTTATAATGTAATCGTTACTGCTCATGCATTCGTTATAATTTTCTTTATAGTTATACCTATTATAATTGGGGGATTTGGAAACTGACTTGTACCATTAATATTAGGAGCACCTGATATAGCATTCCCTCGAATAAATAATATAAGTTTTTGATTACTACCCCCTTCATTAACCCTTTTATTAGTTAGAAGTATAGTTGAAAACGGGGCTGGAACTGGTTGAACTGTTTACCCTCCACTATCTGCAGCTATTGCACATGGAGGAGGTTCCGTTGATTTAGCAATTTTCTC…
RRSSC6174-15	BOLD:ADB9894	Hymenoptera	Vespidae	Eumeninae	Eumenes crucifera	TACATTATATTTTATTTTTGGAATTTGAGCAGGTATAGTAGGAACATCTTTAAGATTACTAATTCGTGCTGAATTAGGAAATCCTGGATCATTAATTGGCGATGATCAAATTTATAATACTATTGTAACAGCTCATGCTTTCATTATAATTTTTTTCATAGTTATACCTATTATAATTGGAGGATTTGGAAATTGATTAGTTCCTCTTATATTAGGAGCCCCAGATATAGCTTTCCCTCGAATAAATAATATAAGATTTTGACTTCTTCCTCCTTCTATTATACTTTTAATTTCAAGTAGAATTGTAGAAAATGGAGCAGGTACAGGATGAACAGTTTACCCCCCACTTTCATCTAATATTGCTCATAGAGGAAGATCAGTAGATTTAGCAATCTTTTC…
RRGCO589-15	BOLD:AAD1851	Lepidoptera	Coleophoridae	Coleophorinae	Coleophora granifera	AACATTATATTTCATTTTTGGAATTTGAGCAGGAATAGTAGGAACCTCATTAAGTTTACTAATTCGAGCAGAATTAGGAACTCCAGGATCTTTAATTGGAGATGATCAAATTTATAATACTATTGTTACAGCTCATGCCTTTATTATAATTTTTTTTATAGTTATACCAATCATAATTGGAGGTTTTGGTAATTGATTAATTCCTTTAATATTAGGAGCCCCCGATATAGCTTTCCCCCGAATAAATAATATAAGTTTTTGACTTTTACCCCCATCTTTAACTTTATTAATCTCAAGAAGAATTGTAGAAAATGGAGCAGGAACTGGGTGAACTGTTTATCCCCCCCTTTCATCTAATATTGCTCATGGTGGTAGTTCTGTTGATTTAGCTATTTTTTC…
RRMPA008-15	BOLD:AAB0868	Diptera	Calliphoridae	Calliphorinae	Cynomya cadaverina	TATTTTATATTTTATTTTTGGATTATGATCAGGAATAATTGGGTCTTCAATAAGAATAATTATTCGAATAGAATTAGGTAACCCAGGTTATTTAATTAATAATGACCAAATTTATAATTCTATTGTTACAGCTCACGCTTTTATCATAATTTTTTTTATAGTTATACCAATTATAATTGGAGGATTTGGAAATTGGTTAATTCCTTTAATATTAGGAGCTCCAGATATAGCATTTCCTCGAATAAATAATATAAGATTTTGATTATTACCACCATCAATTTTTTTACTGATTAATAGAAGAATTATCAACCAAGGTACAGGAACAGGATGAACAGTTTATCCACCTTTATCAAATAACTTAAATCATGAAGGTATATCAGTTGATTTATCAATTTTTTC…
RRMFI4399-15	BOLD:AAG6364	Hymenoptera	Vespidae	Eumeninae	Symmorphus canadensis	AACTTTATACTTTATTTTTGGGGTATGGGCAGGAATAGTAGGAACTTCCCTCAGACTACTTATTCGAGCTGAATTAGGAAACCCTGGAACTTTAATTGGAGACGACCAAATTTACAATGTAATTGTTACAGCTCATGCATTTGTTATAATTTTCTTTATAGTTATACCCATTGTAATTGGAGGATTTGGAAATTGACTAGTACCCTTAATACTAGGCGCACCAGATATGGCCTTTCCTCGAATAAATAACATAAGATTTTGACTTTTACCCCCCTCTTTAACTCTCCTGCTTATAAGAAGAATAGCAGAAAGAGGTGCGGGTACTGGATGAACTGTTTACCCTCCTCTTTCAGCCAATGTAGCCCATAGAGGAACTTCTGTAGATTTAGCAATTTTTAG…
RRMPE009-15	BOLD:ACF3149	Hymenoptera	Ichneumonidae	Ophioninae	Ophion	AACTTTATATTTTATCTTTGGGGCCTGGGCCGGAATAGTCGGAACATCCCTAAGATTATTAATCCGATCTGAATTGGGAACTCCAGGATCTTTAATTGGAGATGACCAAATTTACAATGTAATTGTAACTGCTCATGCTTTTGTAATAATTTTCTTTATAGTAATACCCATTATAATTGGGGGATTTGGCAACTGATTAGTCCCCCTTATGCTAGGAGCCCCAGACATGGCATTCCCTCGAATAAATAACATAAGATTTTGATTGCTGCCCCCTTCCCTAACTTTACTAATTATAAGAAGAATTGTTGAAAGTGGGGCAGGAACAGGTTGAACAGTTTACCCTCCCCTTTCCTCAAATATTGCCCATGGTGGATCTTCAGTTGATTTAGCAATTTTCAG…
RRGCO094-15	BOLD:ACG9804	Lepidoptera	Plutellidae	Plutellinae	Plutella porrectella	AACTTTATATTTTATTTTTGGTATTTGAGCTGGAACAGTTGGCACATCTCTAAGTCTATTAATTCGAGCTGAATTAGGAAATCCAGGATCTTTAATTGGTGATGATCAAATTTATAATACTATTGTAACAGCCCATGCTTTTATTATAATTTTTTTTATAGTAATACCTATTATAATTGGTGGATTTGGTAATTGATTAATTCCTTTAATACTAGGAGCTCCAGATATAGCATTCCCACGAATAAATAATATAAGATTTTGATTATTACCTCCTTCTTTAACCCTTTTAATTTCTAGAAGAATTGTAGAAAATGGAGCAGGAACTGGATGAACTGTGTACCCCCCACTTTCATCTAATATTGCTCACAGTGGGAGATCCGTTGATTTAGCTATTTTTTC…
RRMFE3036-15	BOLD:AAG8323	Hymenoptera	Ichneumonidae	Ophioninae	Ophion bilineatus	AACTTTATATTTTATTTTTGGGGTTTGATCAGGAATAGTAGGAACATCATTAAGTTTATTAATTCGAGCAGAATTAGGTAACCCAGGATCTTTAATTGGAGATGATCAAATTTATAATACTATTGTAACAGCTCATGCTTTTATTATAATTTTTTTTATAGTAATGCCTATTATAATCGGGGGATTCGGAAACTGATTAGTCCCTTTAATACTAGGAGCCCCTGATATAGCTTTCCCACGAATAAATAATATAAGATTTTGACTTTTACCCCCATCTCTTACTCTATTAATTTCCAGAAGAATTGTAGAAAATGGAGCCGGAACAGGTTGAACTGTTTACCCCCCCTTATCCTCTAATATTGCCCATAGAGGAAGCTCTGTTGACTTAGCAATTTTTTC…
RRMFI4036-15	BOLD:AAG2898	Hemiptera	Cicadellidae	Deltocephalinae	Paraphlepsius	AACTTTATACTTTATTTTCGGTGCATGAGCAGGAACTGTAGGAACCTCGCTCAGAATTTTAATTCGTACAGAATTAGGAAACCCTGGATCTTTAATTGGAAACGATCAAATTTATAACGTGATTGTTACAGCACATGCTTTTGTCATAATTTTTTTTATAGTTATACCTATTATAATTGGTGGATTTGGAAATTGACTAGTGCCTCTAATATTGGGTGCTCCAGATATGGCTTTCCCTCGAATAAACAATATAAGATTTTGACTTTTACCACCGTCACTTTCACTACTTTTAATAAGTAGAATTGTTGAAAATGGAGCTGGGACAGGATGAACTGTCTATCCACCACTATCTGCAAATATCGCTCATAGTGGAGCTTCAGTCGATTTAGCTATTTTCAG…
RRSSC4776-15	BOLD:ABX9947	Hemiptera	Cicadellidae	Coelidiinae	Neocoelidia tumidifrons	TACATTATATTTTATTTTTGGAATTTGAGCTGGAATAGTAGGAACATCTTTAAGATTATTAATTCGAGCTGAATTAGGAAATCCTGGATCTTTAATTGGAGATGATCAAATTTATAATACTATTGTAACAGCTCACGCTTTTATTATAATTTTTTTTATAGTTATACCTATTATAATTGGAGGATTTGGAAATTGATTAGTACCTTTAATATTAGGAGCTCCAGATATAGCTTTCCCACGTATAAATAACATAAGATTTTGACTTTTACCTCCTTCTATTATACTTTTAATTTCAAGAAGAATTGTAGAAAATGGAGCAGGTACAGGATGAACAGTTTACCCCCCACTTTCATCAAATATTGCTCATAGAGGAAGATCTGTAGATCTAGCAATTTTTTC…
RRMFE2517-15	BOLD:ACE9696	Hemiptera	Cicadellidae	Cicadellinae	Draeculacephala	AACTCTATACTTTATTTTTGGAATTTGATCAGGCATAATTGGAACTTCATTAAGAATATTAATTCGATCAGAACTAGGAAACCCTGGAACATTAATTGGAAATGACCAAATTTATAATGTAATCGTAACAGCCCATGCATTCATTATAATTTTTTTCATAGTAATACCAATTATAATTGGGGGATTTGGAAATTGACTAGTCCCATTAATATTAGGAGCCCCTGATATAGCCTTTCCTCGTCTTAATAACATAAGATTTTGATTATTACCACCTTCTTTAACATTACTTTTAATGAGAAGAATAGTAGAAAGAGGGGCTGGAACTGGATGAACTGTTTATCCTCCCCTTTCATCTAATATTGCCCATGGAGGTTCTTCTGTAGATTTAGCTATTTTCAG…
RRGCO086-15	BOLD:AAA5398	Trichoptera	Limnephilidae	Leptocerinae	Triaenodes tardus	AACCTTATATTTTATTTTTGGGGCTTGATCTGGTATAGTAGGAACATCCCTGAGACTATTAATTCGAGCTGAATTAGGTCAACCAGGTGCTTTAATTGGTGACGATCAAATTTTTAATGTTATTGTAACAGCTCATGCTTTTGTCATAATTTTCTTTATAGTTATGCCAATTTTAATTGGAGGATTTGGAAATTGATTAGTACCCCTAATATTAGGGGCTCCTGATATAGCTTTTCCTCGAATAAATAATATGAGATTCTGACTTTTACCTCCTTCTTTAACTTTATTACTTACTAGTTCTTTAGTTGAAAACGGAGCTGGGACAGGTTGAACTGTCTACCCCCCTCTATCATCAACTATTGCTCATGCTGGTGCTTCAGTAGATTTAGCTATTTTTTC…
RRGCO721-15	BOLD:AAC0745	Lepidoptera	Crambidae	Pyraustinae	Perispasta caeculalis	AATTTTATACTTTATTTTCGGCTTATGAGCTGGCATATTAGGCTCATCCATAAGAATTATTATTCGTATAGAATTAGGAAATCCCGGCCTATTTATTAATAATGATCAAATTTATAATTCTATTGTTACTGCCCATGCCTTTATTATAATTTTTTTTATAGTTATACCCATCATAATTGGAGGATTTGGTAATTGATTAATCCCACTTATATTAGGAGCACCAGATATATCATTTCCTCGTATAAACAACATAAGATTTTGATTATTACCCCCATCACTATTTTTATTAATTAATAGAAATTTAATTAATCAAGGAGTAGGAACGGGCTGAACTATTTATCCCCCCTTATCATTAAATATTAATCATGAAGGGATATCAATAGATTTAACTATTTTTTC…
RRSSC6279-15	BOLD:AAH0212	Coleoptera	Carabidae	Harpalinae	Lebia fuscata	TACTTTATATTTTATTTTTGGAATCTGAGCAGGAATAGTTGGAACTTCATTAAGTTTACTAATTCGAGCAGAATTAGGAAATCCTGGATCTTTAATTGGTGATGATCAAATTTATAATACTATTGTTACAGCTCATGCATTTATTATAATTTTTTTTATAGTAATACCTATTATAATTGGAGGATTTGGAAATTGATTAATCCCATTAATATTAGGAGCCCCAGATATAGCTTTCCCACGAATAAACAATATAAGTTTTTGACTTCTTCCCCCCTCTTTAACTCTACTTATTTCAAGTAGAATTGTAGAAAATGGAGCAGGAACAGGATGAACTGTGTACCCCCCACTTTCATCTAATATTGCCCATGGAGGTAGATCAGTAGATTTAGCTATTTTCTC…
RRMFA204-15	BOLD:ABY7153	Diptera	Calliphoridae	Calliphorinae	Calliphora livida	AACTTTATATTTTATCTTTGGAATTTGATCTGGAATAATTGGAACTTCTTTAAGTTTATTAATTCGAGCAGAATTAGGTAATCCTGGATCTTTAATTGGAAATGATCAAATTTATAATACTATTGTTACAGCTCATGCTTTTATTATAATTTTTTTTATAGTTATACCCATTATAATTGGAGGATTTGGAAATTGATTAGTACCATTAATATTAGGAGCTCCAGATATAGCATTTCCACGAATAAATAATATAAGATTTTGAATACTTCCACCTTCTTTAACTCTATTAATTTCAAGAAGAATCGTAGAAAATGGAGCTGGAACTGGATGAACTGTGTACCCCCCCCTTTCATCTAATATTGCTCATGGAGGAAGCTCTGTAGATCTTGCTATTTTTTC…
RRSSA267-15	BOLD:AAI6808	Hymenoptera	Tenthredinidae	Nematinae	Hemichroa militaris	AACATTATATTTTTTATTTGGAACATGAGCTGGTATAGTAGGAACATCTTTAAGAATTTTAATTCGTGCAGAATTAGGTCATCCAGGTGCTTTAATTGGTGATGATCAAATTTATAATGTAATTGTTACTGCACATGCTTTTGTTATAATTTTTTTTATAGTAATACCAATTATAATTGGAGGTTTTGGAAATTGACTAGTCCCTTTAATATTAGGAGCTCCTGATATAGCATTTCCTCGAATAAATAATATAAGTTTTTGATTATTACCTCCTTCATTAACATTATTACTAGTAAGTAGTATAGTAGAAAATGGAGCTGGAACAGGATGAACAGTTTACCCCCCTCTTTCATCTAGAATTGCTCATGGAGGAGCTTCAGTAGATTTAGCTATTTTTTC…
RRMFG2315-15	BOLD:AAG5594	Coleoptera	Cerambycidae	Lepturinae	Analeptura lineola	GACTTTATATTTTTTATTTGGAATATGAGCAGGAATAATTGGTACTTCTCTCAGTATTTTAATTCGATTAGAATTAGCTTCAACAGGAAGATTAATCGGAAACGACCAAATTTATAATGTAATTGTAACAGCCCATGCTTTTGTTATAATTTTCTTTATAGTTATACCTATTATAATTGGAGGATTTGGGAACTGACTTGTCCCTTTAATAATTGGGGCCCCTGATATAGCTTTCCCACGTTTAAATAATATAAGATTTTGGTTATTACCACCTTCTTTAACTCTTCTTTTATCTAGAATACTAGTTGAAATAGGAGCAGGAACTGGATGAACAGTTTATCCCCCCTTATCCTCTAATCTAGCTCATAATGGATCTTCTGTAGATTTAGTAATTTTTAG…
RRMFD544-15	BOLD:AAD6445	Hymenoptera	Halictidae	Halictinae	Augochlora pura	AACATTATATTTTATTTTTGGAATTTGAGCTGGAATAGTAGGAACTTCCCTAAGATTATTAATTCGAGCTGAATTAGGAACTCCAGGATCATTAATTGGAGATGATCAAATTTATAATACAATTGTTACAGCCCATGCTTTTATTATAATTTTTTTTATAGTTATACCAATTATAATTGGAGGATTTGGAAATTGATTAGTACCTTTAATATTAGGAGCCCCAGACATAGCTTTCCCCCGAATAAATAATATAAGTTTTTGACTTCTCCCCCCATCATTAACTTTATTAATTTCAAGAAGAATTGTAGAAAATGGAGCAGGAACAGGATGAACAGTGTACCCCCCACTTTCATCTAACATTGCTCATGGAGGAAGTTCAGTTGATTTAGCTATTTTTTC…
RRGCO299-15	BOLD:AAC9993	Lepidoptera	Gelechiidae	Gelechiinae	Athrips mouffetella	AATTTTATATTTTATATTTGGTCTTTGATCAGGTATAATTGGTTCAGCATTAAGAATAATTATTCGACTAGAATTAGGAACACCAGGAAAATTAATTGGTAATGATCAAATTTATAATACCTTAGTAACTGCTCATGCATTTATTATAATTTTCTTTATAGTTATACCTTTTATAATTGGAGGATTTGGAAATTGATTAGTTCCTTTAATATTAGCAGCTCCTGATATAGCTTTTCCTCGAATAAATAATATAAGATTTTGATTATTACCTCCATCTTTATTTTTTTTATTATTAAGAAATATTATTGGTACCGGAGTAGGAACTGGATGAACTCTATATCCACCTTTATCCTCTATTACAGGTCATAATTCTCCATCTGTTGATTTAGGAATTTTCTC…
RRGCO105-15	BOLD:AAB9376	Trichoptera	Limnephilidae	Leptocerinae	Leptocerus americanus	AATTCTATACTTTATTTTTGGTATATGATCAGGCATAATAGGATCTTCATTAAGATTATTAATTCGAATAGAATTAGGTAATCCAGGTTATTTAATTAATAATGATCAACTATATAATTCTATTATTACATCGCATGCCTTTATTATAATTTTTTTCATGGTAATACCTATTATAATTGGCGGATTTGGAAATTGAATAATCCCATTAATACTTGGGGCCCCAGATATAGCCTTCCCCCGAATAAATAATATAAGATTTTGACTTTTACCTCCTTCTATTAATTTATTAATTTTAAGAAATATAACTAATCAAGGAGTAGGAACAGGATGAACAGTTTATCCACCTTTATCACTAAACTTAAATCATGAAGGAATAGCTTTAGATATAGCAATTTTCTC…
RRBPA101-15	BOLD:AAU8495	Hymenoptera	Ichneumonidae	Cryptinae	Bathythrix decipiens	AACCTTATATTTCCTTTTTGGAGCTTGATCAGGTATACTAGGAACTTCCCTGAGTCTTCTAATTCGTGCAGAACTTGGAAGACCGGGATCCCTAATTGGGAATGACCAAATTTACAACGTAATTGTTACTGCCCACGCATTCATTATAATTTTTTTTATAGTTATGCCTATTATAATTGGGGGATTTGGAAACTGGCTAATTCCCTTAATGCTTGGAGCCCCTGACATAGCTTTCCCGCGTATAAACAACATAAGATTTTGATTTTTACCTCCCTCTTTAAGCCTACTTCTCATAAGAAGAATTGTAGAGAATGGAGCAGGAACAGGATGAACAGTCTACCCTCCTCTCTCAGCAAATATTGCTCATAGAGGTTCATCAGTAGACTTAGCAATTTTCAG…
RRGCO735-15	BOLD:AAB2076	Lepidoptera	Tortricidae	Olethreutinae	Ancylis metamelana	AACATTATATTTTATTTTTGGAATTTGAGCTGGAATAGTTGGAACTTCATTAAGACTTTTAATTCGAGCTGAATTAGGAAACCCAGGGTCTTTAATTGGAGATGATCAGATTTATAACACTATTGTTACTGCTCATGCATTTATTATAATTTTTTTTATAGTAATGCCTATTATAATTGGTGGATTTGGAAATTGATTAGTTCCATTAATATTAGGAGCCCCAGACATAGCATTCCCCCGAATAAATAATATAAGATTTTGATTATTACCTCCTTCTATTATACTATTAATTTCAAGTAGAATTGTAGAAAATGGAGCAGGTACTGGATGAACAGTTTATCCCCCACTTTCATCAAATATTGCTCATAGAGGCAGATCTGTAGATTTAGCTATTTTTTC…
RRGCO073-15	BOLD:AAA1530	Trichoptera	Limnephilidae	Leptocerinae	Oecetis inconspicua	AACTTTATATTTTATTTTTGGAATTTGAGCAGGAACAGTAGGAACATCTTTAAGATTATTAATTCGAGCAGAATTAGGAAACCCAGGTTCTTTAATTGGAGATGATCAAATTTATAATACTATTGTTACAGCTCATGCTTTCATTATAATTTTTTTTATAGTTATACCAATTATAATTGGAGGTTTTGGAAATTGATTAGTTCCTTTAATATTAGGAGCTCCAGATATAGCTTTCCCTCGAATAAATAATATAAGATTTTGACTATTACCCCCGTCATTAACTTTACTAATCTCTAGAAGAATTGTAGAAAATGGAGCAGGAACAGGATGAACAGTTTACCCCCCACTTTCATCTAATATTGCCCATGGAGGAAGATCAGTAGATTTAGCAATTTTTTC…
RRMPG973-15	BOLD:AAE2211	Diptera	Tephritidae	Trypetinae	Strauzia	AACTTTATATTTCATTTTTGGAATCTGGTCAGGAATGTTAGGAATAATATTAAGTATAATTATTCGTATTGAGTTAGCCCAACCTGGATCATTTATTAATGATGATCAAACTTATAATGTAATTGTTACTTCACATGCTTTTATTATAATCTTCTTCATAGTAATACCAATCATGATTGGTGGATTCGGAAATTGACTATTACCTTTAATAATTGGAGCTCCTGACATAGCATTTCCCCGACTTAATAATATAAGATTTTGACTTTTACCTCCAGCACTTACACTTCTTCTTTCAAGTTCACTTGTTGAAATAGGTGTAGGTACTGGATGAACAGTGTACCCACCATTATCTAGAAATATTGCTCACTCAGGCCCAAGAGTTGACATATCAATTTTTTC…
RRGCO652-15	BOLD:AAA6431	Lepidoptera	Erebidae	Lymantriinae	Orgyia leucostigma	AACATTATATTTTATCTTTGGAATTTGAGCTGGAATAGTCGGAACTTCCTTAAGTCTATTAATTCGAGCTGAATTAGGTACCCCTGGATCTTTAATTGGAGACGATCAAATTTATAATACTATTGTAACAGCTCATGCTTTTATTATAATTTTTTTTATAGTAATACCAATTATAATTGGAGGATTTGGAAATTGATTAGTTCCTTTAATGTTAGGAGCTCCTGATATAGCTTTCCCTCGAATAAATAATATAAGATTTTGATTACTACCTCCCTCTATTACATTATTAATTTCCAGTAGAATTGTTGAAAATGGAGCTGGAACTGGATGAACTGTATACCCCCCTTTATCTTCTAATATTGCCCATGGAGGAAGTTCTGTCGATCTAGCTATCTTCTC…
RRMFI4174-15	BOLD:AAG1434	Hymenoptera	Braconidae	Macrocentrinae	Austrozele	AACCCTTTATTTCATATTTGGGGCATGAGCTGGAATAGTCGGAACATCCCTAAGAATTCTAATTCGAGCCGAACTAGGACACCCTGGTGCTTTAATTGGAGACGACCAAATTTACAATGTAATTGTCACAGCCCATGCATTTGTAATAATTTTTTTTATAGTGATACCTATTATAATCGGAGGATTTGGGAATTGACTGGTTCCTTTAATATTAGGGGCTCCTGATATGGCCTTTCCTCGAATAAATAATATAAGTTTTTGACTTCTCCCTCCATCATTAACCCTTTTATTAGTCAGTAGCCTAGTTGAAAATGGGGCTGGTACGGGCTGAACTGTTTACCCCCCCTTGTCTTCTGGCATCGCACATGGAGGAGCTTCAGTTGATTTAGCAATTTTCTC…
RRMFB1016-15	BOLD:AAA7550	Lepidoptera	Depressariidae	Depressariinae	Agonopterix pulvipennella	GACATTATACTTTATTTTTGGAATCTGATCAGGAATAATAGGAATAATATTAAGAATAATTATTCGAATTGAACTAGCTCAACCAGGACCATTTTTAATAAATGATCAATTATATAATGTAATTGTAACATCACATGCATTTATTATAATTTTTTTTATAGTAATACCAATTATAATTGGGGGATTTGGTAACTGATTATTGCCCTTAATAATTGGAGCACCAGATATAGCATTCCCACGAATAAATAATATAAGATTCTGACTTTTACCACCATCACTAACACTTCTATTAGTTAGATCTATAGTAGAAATAGGAGCGGGAACTGGTTGAACAGTATACCCACCATTATCATCTAATGCAGCACATTCAGGACCTAGAGTTGACCTAGCAATTTTCTC…
RRGCO806-15	BOLD:AAA9748	Trichoptera	Phryganeidae	Phryganeinae	Ptilostomis ocellifera	AACATTATATTTTATTTTTGGAATTTGAAGAGGAATAGTTGGAACATCTTTAAGTTTATTAATTCGAGCTGAATTAGGTAATCCTGGATCCTTAATTGGAGATGATCAAATTTATAATACAATTGTTACAGCCCATGCATTTATTATAATTTTTTTTATAGTTATACCTATTATAATTGGGGGGTTTGGGAATTGATTAGTCCCTCTTATATTAGGAGCCCCTGATATAGCATTTCCACGAATAAATAACATAAGATTTTGATTACTTCCACCTTCTTTAACTCTTCTAATTTCAAGAAGTATTGTAGAAAATGGAGCAGGAACTGGATGAACTGTTTATCCCCCTCTTTCATCAAACATTGCTCATGGAGGAAGATCAGTAGATTTAGCAATCTTTTC…
RRSSC6586-15	BOLD:AAC3361	Coleoptera	Carabidae	Harpalinae	Poecilus lucublandus	AATACTATATTTTATCTTCGCAATATGATCAGGAATAATTGGAGCTTCATTAAGTATAATCATTCGTATAGAATTAAGAGCCCCCGGAAAATGAATTAATAATGATCAAATTTATAACACTATTGTTACATCCCACGCTTTCATTATAATCTTTTTTATAGTTATACCATTTATAATTGGAGGATTTGGTAACTGATTAATTCCACTAATAATTGGAGCCCCTGATATGGCATTCCCTCGAATAAATAATATAAGATTCTGATTATTAATCCCATCACTTATTATACTTCTATTAAGATCAACTTTAACAGATGGATCAGGGACAGGATGAACTATCTACCCTCCTCTATCATCAATTATATACCATTCCTCTAATTCTGTTGACTTCACAATTTTTTC…
RRMFE3077-15	BOLD:AAE5495	Hymenoptera	Megachilidae	Megachilinae	Osmia lignaria	AACTTTATACTTCATTTTTGGAGCATGATCTGGAATAATTGGTACTTCATTAAGTATTTTAATTCGAACTGAATTAGGACATCCAGGTTCATTAATTGGTGATGATCAAATTTATAATGTAATTGTTACAGCACATGCATTTATTATAATTTTTTTTATAGTAATACCTATTATAATTGGAGGATTTGGAAATTGATTAGTTCCTTTAATATTAGGAGCTCCAGATATAGCATTTCCACGAATAAACAATATAAGTTTTTGACTACTTCCTCCTTCATTAATACTTTTATTAGCAAATAGTATAGTAGAAAATGGAGCTGGGACAGGATGAACAGTTTACCCACCTTTATCTTCAGTGATTGCTCATGGAGGAGCTTCTGTAGATTTAGCAATTTTTTC…
RRGCO071-15	BOLD:AAA1525	Trichoptera	Limnephilidae	Leptocerinae	Oecetis inconspicua	AACATTATATTTTATTTTTGGTATTTGAGCAGGAATAATTGGAACTTCATTAAGATTATTAATTCGAGCTGAATTAGGAAATCCCGGATCTTTAATTGGAGATGATCAAATTTATAATACTATTGTCACTGCACATGCTTTTATTATAATTTTTTTTATGGTAATACCAATTATAATTGGAGGATTTGGAAATTGATTAGTACCTTTAATATTAGGAGCACCAGATATAGCATTCCCACGAATAAACAATATAAGATTTTGATTATTACCTCCATCTATTATATTACTAATTTCAAGAAGAATTGTGGAAAATGGAGCAGGTACTGGATGAACAGTGTACCCCCCACTCTCATCTAATATTGCTCATAGAGGTAGATCTGTAGATTTAGCTATTTTTTC…
RRGCO128-15	BOLD:AAA6003	Lepidoptera	Tortricidae	Olethreutinae	Olethreutes bipartitana	AACTTTATACTTTATTTTTGGAATTTGAGCAGGTATAATTGGCACTTCCTTAAGACTTTTAATTCGAGCTGAGTTAGGAAATCCTGGGTCTTTAATTGGAGATGACCAAATTTATAACACAATTGTTACAGCCCATGCCTTTATTATAATTTTTTTCATAGTTATACCCATTATAATTGGGGGATTTGGAAATTGATTAGTACCTTTAATACTTGGAGCCCCTGATATAGCATTCCCCCGAATAAATAATATAAGATTTTGACTTTTACCTCCTTCAATTACTTTATTAATCTCAAGTAGAATTGTAGAAAATGGAGCAGGAACTGGATGAACCGTTTACCCCCCTCTTTCCTCAAATATTGCCCATGGAGGTAGATCAGTAGACTTAGCTATTTTTTC…
RRMFI4186-15	BOLD:AAM4213	Hymenoptera	Braconidae	Braconinae	Atanycolus ulmicola	AACTTTATATTTTATCTTTGGGGCTTGAGCAGGTATAGTGGGAACATCTCTTAGTATTATTGTTCGAGCAGAATTAGGACACCCAGGCGCTCTAATTGGAGATGATCAAATTTATAATGTAGTAGTTACAGCCCACGCATTCGTTATAATTTTCTTTATAGTAATGCCAATTATAATTGGAGGATTTGGTAACTGATTAGTTCCCCTAATATTAGGAGCACCTGATATAGCTTTCCCCCGAATAAATAATATAAGATTCTGAATGTTACCTCCCTCTCTTACCCTTCTTTTAGCAAGTAGTATAGTAGAAAACGGAGCAGGAACAGGATGAACAGTTTATCCGCCCCTATCCGCAGGAATTGCTCACGGTGGTGCATCTGTAGATTTAGCAATTTTTTC…
RRMFC2061-15	BOLD:ACL7820	Hymenoptera	Sapygidae	Sapyginae	Sapyga centrata	AACATTATATTTTTTATTTGGAGCTTGAGCTGGATTAGTTGGTACTTCATTAAGTATTTTAATTCGTGCAGAACTTGGTCATCCGGGAGCATTAATTGGAGATGATCAAATTTATAATGTAATTGTAACTGCTCATGCATTTGTAATAATTTTTTTTATAGTTATACCAATTATAATTGGAGGATTTGGAAATTGATTAGTTCCATTAATATTAGGAGCCCCTGATATAGCATTTCCTCGAATAAATAATATAAGATTTTGATTATTACCACCTTCATTAACATTATTATTAGTAAGTAGAATAGTTGAAAATGGAGCAGGAACAGGTTGAACAGTTTATCCTCCTCTTTCAGCTAATATTGCTCATAGTGGAGCTTCAGTTGATTTAGCAATTTTTTC…
RRSSA2350-15	BOLD:AAG4434	Coleoptera	Carabidae	Harpalinae	Badister obtusus	AACATTATATTTTATTCTAGGAGCATGATCAGGAATAGTAGGAACTTCATTAAGTATTTTAATTCGAGCTGAATTAGGACACCCTGGAGCACTAATTGGAGATGATCAAATTTATAATGTTATTGTAACAGCACATGCTTTTATTATAATTTTTTTTATAGTAATACCTATTATAATTGGAGGATTTGGAAATTGATTAGTTCCTTTAATATTAGGAGCTCCTGATATAGCCTTTCCTCGAATAAATAATATAAGTTTCTGACTCTTACCTCCTGCATTAACTTTATTGTTAGTAAGTAGTATAGTAGAAAACGGAGCTGGAACAGGATGAACTGTTTACCCTCCTTTATCTTCTAATATTGCTCATGGTGGAGCTTCTGTCGATTTAGCTATTTTTTC…
RRSSC1919-15	BOLD:AAG7768	Hymenoptera	Ichneumonidae	Cryptinae	Aritranis director	TATACTTTACTTTATTTTTGCTATATGATCAGGAATAATTGGTGCATCACTAAGTATAATTATCCGTATAGAACTAGCAACTCCTGGAAGATGAATTAATAATGATCAAATTTATAATACTATTGTTACTGCCCATGCTTTTATTATAATTTTCTTTATAGTTATACCATTCATAATTGGAGGATTTGGAAATTGATTAGTACCCTTAATAATTGGAGCCCCAGATATAGCTTTCCCACGAATAAATAATATAAGATTTTGATTATTAATTCCTTCCTTATTACTACTATTAATAGGAAATACTTTAACTTCAGGTTCAGGAACAGGATGAACAATTTACCCTCCATTATCATCAATTATATTTCATTCATCTTTTTCAGTAGATTTTTCTATCTTCTC…
RRSSC3239-15	BOLD:AAD1219	Hemiptera	Nabidae	Nabinae	Nabis rufusculus	AACTTTGTATTTTATTTTTGGTGCGTGATCCGGGTCACTAGGGTTAGCCTTAAGCCTATTAATTCGAGCAGAATTAGGAACCCCAGGAACATTAATTGGGAATGACCAAATTTATAATGTTATTGTTACAGCTCATGCTTTTATTATAATTTTTTTTATAGTTATACCTATTATAATTGGAGGATTTGGGAACTGATTGGTTCCTCTAATATTGGGAGCCCCTGATATGGCTTTTCCACGAATAAACAATATAAGATTTTGATTTCTCCCCCCTTCTCTAATATTTTTATTAATAAGAAGAATAGTTGAAAGAGGGGCAGGAACAGGATGAACTGTTTACCCCCCTCTATCTGCTAATATTGCTCACAGAGGCCCCTCTGTTGATCTAGCTATTTTTAG…
RRSSC6514-15	BOLD:ACW5476	Hemiptera	Geocoridae		Geocoridae	TACTTTATATTTTATTTTTGGAATTTGAAGAGGAATAGTAGGAACTTCTTTAAGTTTACTAATTCGTGCTGAATTAGGTAATCCGGGATCTTTAATTGGAGATGATCAAATTTATAATACAATTGTTACAGCTCATGCATTTATTATAATTTTTTTTATAGTTATACCTATTATAATTGGAGGATTCGGAAATTGATTAGTGCCTCTTATATTAGGAGCCCCAGATATAGCTTTTCCACGAATAAATAATATAAGATTTTGATTATTACCCCCATCATTAACTCTTTTAATTTCAAGAAGAATTGTAGAAAATGGAGCTGGAACTGGATGAACTGTATATCCTCCTCTTTCATCTAATATTGCTCATGGGGGAAGATCAGTTGATTTAGCAATTTTTTC…
RRMFG2736-15	BOLD:AAU8702	Hymenoptera	Tenthredinidae	Allantinae	Taxonus terminalis	AACACTATACTTTATTTTTGGAGCCTGAGCAGGAATAGTAGGAACTTCTTTAAGAATAATAATTCGAGCAGAATTAGGACATCCTGGATCTTTAATTGGTGATGATCAAATTTATAATGTAATTGTTACTGCTCATGCATTTATTATAATTTTTTTTATAGTTATACCTATTATAATTGGTGGATTCGGAAATTGATTAGTTCCCCTAATATTAGGAGCCCCTGATATAGCTTTCCCTCGAATAAATAATATAAGTTTTTGGTTACTTCCACCTTCTTTGACCCTTCTATTAGCTAGTAGTGTAGTAGAAAATGGAGCTGGTACTGGATGAACAGTTTATCCCCCCCTTTCAGCTAGAATTGCTCATGGAGGAGCATCAGTAGATTTAGCTATTTTTTC…
RRMFB1090-15	BOLD:AAG2479	Diptera	Anthomyiidae	Pegomyinae	Pegomya flavifrons	AACCCTTTATTTTATTTTTGGAGCTTGGGCAGGAATAATAGGAACTTCCTTAAGTTTATTGATTCGTGCAGAATTAGGTAACCCTGGATCGTTAATTGGGGATGACCAAATTTACAATGTAATTGTCACAGCTCATGCCTTCGTAATAATTTTCTTCATAGTTATACCTATTTTAATTGGGGGTTTTGGAAATTGACTTGTTCCTCTTATATTAGGAGCCCCTGATATAGCTTTCCCCCGAATAAACAACATAAGATTTTGACTCCTTCCCCCTTCCCTATCCCTCTTAGTAATAAGAAGAATTGTAGAAACAGGAGCAGGAACAGGGTGAACTGTTTACCCACCCCTTTCATCAAATATTGCCCATAGAGGAGCTTCTGTTGATTTAGCTATTTTTAG…
RRGCO085-15	BOLD:AAA5876	Trichoptera	Limnephilidae	Leptocerinae	Ceraclea	AACTTTATATTTTATTTTCGGAGCATGAGCCGGAATAGTAGGAACTTCTTTAAGAATTCTTATTCGAGCTGAATTAGGTCACCCAGGAGCATTAATTGGAGATGATCAAATTTATAATGTAATTGTTACAGCTCATGCTTTTATTATAATTTTTTTTATAGTAATACCTATTATAATTGGAGGGTTTGGAAATTGACTGGTTCCTTTAATACTAGGAGCTCCTGATATAGCTTTCCCTCGAATAAATAATATAAGTTTTTGACTTTTACCTCCTGCATTAACTTTATTATTAGTAAGCAGTATAGTAGAAAACGGGGCTGGAACAGGATGAACTGTTTACCCACCCCTATCTTCAAATATTGCTCATGGGGGAGCTTCTGTTGATTTAGCAATTTTTTC…
RRSSC4121-15	BOLD:AAN8130	Hymenoptera	Tenthredinidae	Nematinae	Pachynematus extensicornis	AACATTATATTTTATTTTAGGATTTTGATCAGGAATATTAGGATTATCATTTAGAATATTAATTCGAACAGAATTAGGTATACCAGGATCAATAATTGGAGATGATCAAATTTATAATGTGATTGTAACATCCCATGCATTTTTAATAATTTTTTTTATAGTTATACCAATTATAATTGGAGGATTTGGAAATTGATTAATCCCATTAATATTAGGAGCCCCAGATATGGCATTTCCACGATTAAATAATATAAGATTTTGATTTTTACCACCCTCATTAATTTTATTATTATCTAGAAGAATTGTAAATTCAGGATCAGGAACTGGATGAACTGTTTACCCTCCTCTATCTAGAAGAATTTCTCACTCAGGAGCATCAGTAGATTTAACTATTTTCTC…
RRGCO100-15	BOLD:ACL7631	Trichoptera	Polycentropodidae	Polycentropodinae	Plectrocnemia cinerea	GACATTATATTTCATTTTTGGAATTTGAGCCGGAATAATCGGAACTTCTTTAAGACTTTTAATTCGAGCTGAATTAGGAAACCCTGGGTCTTTAATTGGAGATGATCAAATTTATAATACTATCGTTACTGCCCATGCTTTTATTATAATTTTTTTTATAGTAATACCAATTATAATTGGGGGATTTGGAAATTGACTAGTTCCTTTAATATTAGGTGCTCCTGATATAGCATTCCCACGAATAAATAATATAAGATTTTGACTACTCCCCCCTTCAATTATACTTTTAATTTCGAGTAGTATTGTAGAAAATGGAGCTGGAACTGGATGAACAGTTTACCCCCCTCTATCTTCAAACATTGCTCACGGGGGAAGATCTGTAGATCTCGCAATTTTTTC…
RRMPA085-15	BOLD:AAC6233	Hemiptera	Nabidae	Nabinae	Nabis roseipennis	AACTTTATATTTTATTTTTGGAGCATGATCTGGATCCTTAGGATTAGCTTTAAGACTTTTAATTCGAGCTGAATTAGGAACTCCGGGAACTTTAATTGGTAATGATCAAATTTATAATGTTATTGTTACTGCTCATGCTTTTATTATAATTTTCTTTATAGTTATACCTATTATAATTGGTGGGTTTGGAAATTGATTAGTGCCCCTAATACTAGGAGCCCCTGATATAGCCTTCCCACGAATAAATAATATAAGATTTTGATTCTTACCTCCTTCTCTAATATTTCTTTTAATAAGAAGAATAGTAGAAAGTGGGGCCGGAACAGGATGAACTGTCTACCCTCCTCTTTCTGCAAATATTGCTCATAGAGGACCCTCAGTTGATTTAGCTATTTTCAG…
RRMFC2075-15	BOLD:AAO2094	Hymenoptera	Ichneumonidae	Pimplinae	Iseropus stercorator	AACATTATACTTTATTTTCGGTATTTGAGCTGGTATAATTGGAACTTCTTTAAGATTATTAATTCGAACTGAATTAGGAAATCCAGGATCCTTAATTGGAGACGATCAAATTTATAATACAATTGTAACTGCACATGCTTTTATTATAATTTTTTTCATAGTTATACCTATTATAATTGGAGGATTTGGTAATTGATTAGTACCATTAATATTAGGAGCCCCAGACATAGCATTCCCTCGAATAAATAACATAAGATTTTGACTTTTACCCCCCTCTATCATATTACTAATTTCAAGTAGAATCGTGGAAACCGGAGCAGGAACAGGATGAACAGTATACCCCCCACTGTCATCTAATATTGCCCATAGTGGAAGTTCTGTTGATTTAACTATTTTCTC…
RRGCO675-15	BOLD:AAA1513	Lepidoptera	Plutellidae	Plutellinae	Plutella xylostella	AACATTATATTTTATTTTTGGTATTTGAGCTGGAATAGTAGGAACTTCTTTAAGATTATTAATTCGAGCAGAATTAGGAAATCCCGGATCATTAATTGGAGATGATCAAATTTATAATACTATTGTTACAGCACACGCTTTCATTATAATTTTTTTTATAGTTATACCTATTATAATTGGAGGATTTGGTAACTGACTTGTTCCTTTAATATTAGGAGCCCCAGATATGGCATTCCCCCGAATAAATAATATAAGTTTTTGACTCCTCCCCCCTTCTCTAACTCTTTTAATTTCAAGAAGAATTGTAGAAAATGGAGCAGGAACAGGATGAACAGTGTACCCCCCACTTTCATCTAATATTGCTCATGGAGGAAGATCAGTAGACCTTGCTATTTTTTC…
RRSSA3927-15	BOLD:AAZ0152	Hymenoptera	Braconidae	Braconinae	Digonogastra	TACATTATATTTTATTTTCGGAGCATGATCAGGTATAATTGGAACTTCTTTAAGTATTTTAATTCGAGCTGAATTAGGACATCCTGGAGCATTAATTGGTGATGATCAAATTTATAATGTTATTGTAACAGCTCATGCTTTTATTATAATTTTTTTTATAGTAATACCTATTATAATTGGAGGATTTGGAAACTGATTAGTTCCTTTAATACTTGGAGCTCCTGATATAGCTTTCCCTCGAATAAATAATATAAGTTTTTGACTTTTACCTCCTGCATTAACTTTATTGTTAGTAAGTAGTATAGTAGAAAATGGAGCTGGAACAGGATGAACTGTTTACCCACCTTTATCTTCTAATATTGCTCATGGTGGAGCTTCTGTAGATTTAGCTATTTTTTC…
RRGCO701-15	BOLD:AAB1378	Lepidoptera	Urodidae		Wockia asperipunctella	AACTTTATATTTTATTTTTGGTATTTGAGCAGGAATAGTTGGAACTTCATTAAGATTACTAATTCGAGCTGAATTAGGAACCCCCGGATCTTTAATTGGAGATGACCAAATTTATAATACTATTGTGACAGCTCATGCATTTATTATAATTTTTTTTATAGTAATACCTATTATAATTGGAGGTTTTGGAAATTGACTTATTCCTTTAATATTAGGAGCTCCTGATATAGCTTTCCCACGAATAAATAATATAAGTTTTTGATTATTACCCCCATCATTAACTCTTTTAATTTCTAGAAGAATTGTAGAAAATGGTGCAGGAACAGGATGAACGGTTTACCCCCCCCTTTCATCTAATATTGCTCATGGAGGAAGATCAGTAGATTTAGCTATTTTCTC…
RRGCO733-15	BOLD:AAO3983	Trichoptera	Glossosomatidae	Protoptilinae	Protoptila	AACATTATACTTTATTTTTGGAATCTGATCAGGAATAGTAGGAATAATATTAAGAATAATTATTCGAATTGAACTAGCTCAACCAGGACCATTTTTAACAAATGATCAATTATATAATGTAATTGTAACATCACATGCATTTATTATAATTTTTTTCATAGTAATACCAATTATAATTGGGGGATTTGGTAACTGATTATTGCCCTTAATAATTGGAGCACCAGATATAGCATTTCCGCGAATAAATAATATAAGATTCTGACTTTTACCACCTTCACTAACACTCCTATTAGTTAGATCTATGGTAGAAATAGGAGCGGGAACTGGTTGAACAGTATACCCACCATTATCATCTAATGCAGCACATTCAGGGCCTAGAGTTGACCTAGCAATTTTCTC…
RRMFE3052-15	BOLD:AAU8228	Hymenoptera	Ichneumonidae	Cryptinae	Pleolophus basizonus	AACTTTATATTTTATTTTTGGAGCTTGATCAGGAATAATTGGAACTTCATTAAGAATTTTAATTCGTACTGAATTAGGACATCCTGGATCATTAATTGGAAATGATCAAATTTATAATGTTATTGTTACAGCTCATGCTTTTATTATAATTTTTTTTATAGTAATACCAATTATAATTGGAGGATTTGGTAATTGATTAGTTCCATTAATATTAGGAGCTCCAGATATAGCATTCCCACGAATAAATAATATAAGTTTTTGAATACTTCCTCCTGCTTTAACACTTTTGTTAGTGAGCAGAATAGTAGAAAATGGAGCTGGGACAGGTTGAACAGTTTACCCTCCTTTATCTTCTAATATTGCTCATGGTGGAGCTTCTGTAGATTTAGCAATTTTTTC…
RRMFE3144-15	BOLD:AAG7788	Hymenoptera	Tenthredinidae	Allantinae	Taxonus borealis	AACACTTTATTTTATTTTTGGTTTTTGATCTGGTATAGTTGGAACTTCATTAAGAATATTGGTACGAACAGAATTAGGAAATCCAGGTTCCTTAATTGGTAATGACCAAATTTATAATGTTATTGTAACAGCTCATGCTTTTATTATAATTTTTTTTATAGTTATACCTATTATAATTGGAGGTTTTGGAAATTGGCTTGTTCCTTTAATATTAGGTGCACCTGATATGGCTTTTCCACGTTTAAATAATATAAGTTTTTGATTACTTCCTCCCTCAATTTTCTTTCTTATTATAAGAAGAATAGTTGAAATAGGTGCGGGAACCGGTTGAACAGTTTATCCTCCTCTATCATCTAATATTGCCCATAGAGGTTCATCAGTTGATTTAGCTATTTTTAG…
RRGCO706-15	BOLD:ABY9718	Lepidoptera	Coleophoridae	Coleophorinae	Coleophora cornella	AACTTTATATTTTATTTTTGGAATTTGAGCAGGTATAGTAGGAACTTCCTTAAGATTATTAATTCGAGCTGAATTAGGTAATCCAGGATCATTAATTGGAGATGATCAAATTTATAATACTATTGTTACAGCTCATGCTTTTATTATAATTTTTTTTATAGTAATACCTATTATAATTGGAGGTTTTGGTAATTGACTTGTACCTCTTATATTAGGAGCCCCTGATATAGCTTTCCCTCGAATAAATAATATAAGTTTTTGACTTCTCCCCCCATCTTTAACTTTATTAATTTCAAGAAGAATTGTAGAAAATGGAGCAGGAACAGGATGAACAGTTTACCCCCCACTTTCATCTAACATTGCCCATAGAGGAAGATCAGTTGATTTAGCTATTTTTTC…
RRMFI4183-15	BOLD:ACE6336	Hymenoptera	Ichneumonidae	Ctenopelmatinae	Campodorus	AATTCTTTATATAATATTTGCTTTATGATCTGGAATAATTGGTTCAGCAATAAGAATTATTATTCGAATAGAATTAAGTATTCCTGGATCATGAATTTCTAATGACCAAATCTATAATTCTTTAGTTACAGCTCATGCTTTTTTAATAATTTTTTTTCTTGTAATACCATTTTTAATTGGGGGATTTGGAAATTGATTAATTCCTTTAATATTAGGAATTCCAGATATAGCTTTTCCCCGAATAAATAATATTAGATTTTGACTTTTACCCCCATCTTTAATAATTTTACTTTTAAGAAATTTTTTAAATCCAAGACCAGGAACAGGATGAACTGTATATCCTCCTTTATCTTCAAATTTATACCATTCTTCACCCTCAGTAGATTTAGCAATTTTTTC…
RRGCO750-15	BOLD:AAH5561	Lepidoptera	Gelechiidae	Gelechiinae	Isophrictis actinopa	AACTTTATATTTTATTTTTGGAATTTGAGCTGGTATAATTGGAACTTCCATAAGATTATTAATTCGAGCAGAATTGGGAAACCCAGGTTCATTAATTGGGAATGATCAAATTTATAATACCATTGTAACTGCTCACGCCTTTGTTATAATTTTTTTCATAGTTATACCAATTATAATTGGAGGATTTGGTAATTGATTAGTCCCCCTTATACTTGGAGCCCCTGATATAGCTTTCCCCCGAATAAATAACATAAGATTTTGACTTCTACCCCCCTCTTTAATTCTTTTAATTTCAAGAAGAATTGTAGAAAATGGAGCAGGAACTGGATGAACAGTTTACCCACCCCTCTCTTCCAATATCGCTCACGGGGGAAGATCAGTAGATTTAGCTATTTTCTC…
RRGCO758-15	BOLD:AAE3468	Lepidoptera	Gracillariidae	Gracillariinae	Caloptilia hypericella	AACATTATATTTTATTTTTGGTATTTGATCTGGAATAGTAGGAACATCATTAAGATTATTAATTCGAGCTGAATTAGGTAACCCAGGCTCATTAATTGGGGATGATCAAATTTATAATACTATTGTAACTGCTCATGCTTTTATTATAATTTTTTTTATAGTAATACCAATTATAATTGGAGGATTTGGAAATTGATTAGTACCTTTAATATTAGGAGCTCCTGATATAGCTTTCCCACGAATAAATAATATAAGATTTTGATTACTACCCCCTTCTTTAACTCTATTAATTTCAAGAAGTATTGTAGAAACAGGAGCAGGAACAGGATGAACTGTTTACCCCCCTCTCTCTTCTAACATTGCTCATGGAGGAAGTTCAGTAGATTTAGCAATTTTTTC…
RRSSC1936-15	BOLD:AAG7645	Hymenoptera	Ichneumonidae	Ichneumoninae	Vulgichneumon deceptor	AACATTATATTTTATTTTTGGAGCATGATCTGGTATAGTAGGAACATCTTTAAGAATTTTAATTCGAGCTGAATTAGGTCACCCTGGAGCATTAATTGGTGATGATCAAATTTATAATGTAATTGTTACTGCTCATGCATTTATTATAATTTTTTTTATAGTTATACCAATTATAATTGGAGGATTTGGAAATTGATTAGTTCCATTAATATTAGGAGCTCCAGATATAGCCTTCCCCCGAATAAATAATATAAGTTTTTGACTTTTACCTCCAGCTTTAACTTTACTACTAGCAAGTAGTATAGTTGAAAATGGAGCTGGAACAGGATGAACTGTATACCCTCCCCTATCTTCAGTCATCGCTCATGGAGGAGCATCTGTTGATTTAGCTATTTTTTC…
RRMPG969-15	BOLD:AAG6744	Diptera	Sarcophagidae	Miltogramminae	Senotainia trilineata	AACTTTATATTTTATTTTTGGAGCTTGATCAGGAATAATTGGAACTTCATTAAGAATTTTAATCCGAACTGAACTTGGTCACCCTGGTGCCTTAATTGGTGATGATCAAATCTATAACGTAATTGTAACTGCACATGCATTTATTATAATTTTTTTTATAGTAATACCTATTATAATTGGAGGATTTGGAAACTGATTAGTTCCATTAATATTAGGAGCTCCAGATATAGCCTTTCCTCGAATAAACAATATAAGTTTTTGACTTTTACCTCCTGCTTTAATCCTATTATTAGCTAGTAGTATAATCGAAAATGGAGCTGGTACTGGATGAACAGTTTATCCTCCTTTATCATCTAATATTGCTCATAGAAGAGCTTCTGTTGATTTGGCTATTTTTTC…
RRSSA277-15	BOLD:AAG7687	Hymenoptera	Ichneumonidae	Cryptinae	Agrothereutes abbreviatus	AACTTTATATTTTTTATTTGGTGCTTGAGCAGGAATAGTAGGAACATCATTAAGTATTTTAATTCGTGCAGAATTAGGACATCCTGGATCATTAATTGGTGATGATCAAATTTATAATGTAATTGTAACAGCTCATGCGTTTGTAATAATTTTTTTTATAGTTATACCAATTATAATTGGTGGATTTGGAAATTGATTAGTTCCATTAATATTAGGAGCTCCAGATATAGCATTTCCACGAATAAATAACATAAGTTTTTGGATACTACCCCCTTCATTATCCTTATTATTAGTTAGTAGTATAGTTGAAAACGGAGCTGGTACTGGATGAACAGTTTACCCACCCCTATCTTCTACCATTGCACATAGAGGAGCTTCTGTAGACTTAGCAATTTTTTC…
RRGCO280-15	BOLD:AAC2309	Lepidoptera	Gelechiidae	Anacampsinae	Anacampsis niveopulvella	AACACTATATTTCCTATTAGGAAGATGATCAGGAATAGTAGGAACATCGTTAAGAATATTAATTCGAGCAGAATTAGGAAACCCTGGATCATTAATTGGTGATGACCAAATTTATAATGTTATTGTAACTGCCCATGCTTTTGTTATAATTTTTTTTATAGTTATACCTATTCTAATTGGAGGATTTGGTAATTGATTAGTACCCCTTATATTAGGAGCCCCTGATATAGCATTTCCTCGAATAAACAATATAAGATTTTGATTACTTCCTCCTTCCTTAACTTTATTATTATTAAGAAGAATAGTAGAAAGAGGGGCAGGAACTGGTTGAACCGTTTACCCACCTCTTTCAGCCAATATTGCTCATAGAGGAGCATCAGTTGATCTAGCAATCTTTAG…
RRSSC4127-15	BOLD:AAH0112	Coleoptera	Chrysomelidae	Cassidinae	Microrhopala vittata	AACATTATATTTCATTTTTGGTGCATGAGCAAGAATAGTAGGGACCTCCTTAAGTATATTAATTCGATCAGAGCTAGGAAACCCAGGATCATTAATTGGAGATGACCAAATTTATAATGTTATTGTTACAGCCCACGCATTTATCATAATTTTCTTTATAGTTATACCAATCATAATTGGTGGATTCGGAAATTGACTTGTCCCATTAATACTGGGAGCCCCAGACATAGCCTTTCCACGAATAAATAATATAAGATTTTGACTTCTCCCCCCCTCCCTAGCATTATTGATTATAAGAAGAATTGTTGAAAATGGTGCAGGAACAGGATGAACAGTCTATCCCCCATTATCTGCAAATGTAGCCCATAGAGGATCCTCTGTAGACTTAGCAATTTTTAG…
RRMFC2055-15	BOLD:ABZ6834	Hymenoptera	Apidae	Nomadinae	Nomada	AACTCTTTATTTTATTTTCGGAATTTGATCAGGATTAGTTGGATCTTCTTTAAGATTCCTTATTCGAATTGAACTTAGAACTCCAGGGTCTTTAATTGGAAACGACCAAATTTATAATGTAATTGTCACTTCTCATGCATTTATTATAATTTTCTTTATAGTTATACCTATTATAATCGGAGGATTTGGAAACTGATTAGTTCCTTTAATATTAGGATCCCCAGATATAGCTTTTCCTCGAATAAATAATTTAAGATTCTGATTTTTACCTCCTTCATTACTTCTTTTAATTTTAAGAAGAATAATAAATTCAGGAGCTGGCACAGGTTGAACTGTCTATCCACCACTATCATCAAATTTATCCCACCTAGGAAGATCAGTAGATTTAACTATTTTTTC…
RRSSC6588-15	BOLD:AAI2024	Coleoptera	Carabidae	Harpalinae	Harpalus	AACTCTTTATTTTATTTTTGGAGCATGAGCAGGAATAGTAGGAACTTCATTAAGTTTACTTATTCGGGCAGAATTAGGAAGCCCTGGATCTTTAATTGGAGATGATCAAATTTATAACGTTATTGTTACAGCTCATGCTTTTATCATAATTTTCTTTATGGTTATACCTACTGTAATTGGTGGATTTGGAAATTGATTAGTACCTTTGATATTAGGAGCTCCTGATATAGCTTTTCCTCGAATAAACAACATAAGATTTTGATTACTCCCCCCATCATTATCTTTGTTGTTAATAAGAAGAATAGTAGAAAGAGGTGCAGGAACTGGATGAACAGTTTACCCTCCTCTATCATCAAATATTGCCCATAGAGGAGCTTCAGTTGATTTAGCAATTTTTAG…
RRMFG2769-15	BOLD:AAG3193	Hymenoptera	Crabronidae	Crabroninae	Trypoxylon frigidum	AACCTTATATTTTATTTTTGGAGCATGATCAGGGTCTCTTGGACTAGCTTTGAGACTTTTAATTCGAGCAGAATTAGGAACTCCAGGAACTTTAATTGGAAATGATCAAATTTATAACGTAATTGTTACAGCCCACGCCTTTATTATAATTTTCTTTATAGTTATACCTATTATAATTGGGGGATTCGGAAATTGGTTAGTACCTTTGATACTAGGAGCCCCTGATATAGCATTTCCCCGTATAAATAACATAAGATTTTGATTTTTACCGCCTTCTCTTATATTTTTATTAATAAGAAGAATAGTAGAAAGAGGAGCGGGAACAGGATGAACTGTTTATCCCCCTCTATCAGCTAATATTGCTCATAGAGGACCATCAGTTGATTTAGCAATTTTTAG…
RRSSC1834-15	BOLD:AAG2460	Diptera	Anthomyiidae	Anthomyiinae	Hydrophoria lancifer	AACATTATATTTTATTTTTGGAATTTGAGCAGGTATAGTAGGAACCTCTTTAAGATTACTAATTCGAGCTGAATTAGGAAACCCCGGATCTTTAATTGGTGATGATCAAATTTATAATACTATTGTTACAGCTCATGCTTTTATTATAATTTTTTTTATAGTTATACCTATTATAATTGGAGGATTTGGAAACTGACTTGTGCCTTTAATATTAGGAGCTCCAGATATGGCTTTCCCACGAATAAATAATATAAGATTTTGATTGCTCCCCCCCTCATTAACTTTATTAATTTCAAGAAGAATTGTAGAAAATGGTGCAGGAACAGGATGAACAGTTTATCCCCCACTTTCATCTAATATTGCCCATGGAGGAAGTTCTGTAGATTTAGCTATCTTTTC…
RRMFI4181-15	BOLD:ABA8026	Hymenoptera	Ichneumonidae	Campopleginae	Casinaria lamina	AATACTATACTTCATTTTTGGTGCCTGGGCAGGAATAGTTGGAACTTCCCTAAGTTTATTAATTCGATCAGAACTTGGTAATCCTGGATCTTTAATTGGAAATGATCAAATTTATAATGTTATTGTTACAGCTCATGCTTTTATTATAATTTTCTTTATAGTTATACCAGTTATAATTGGTGGATTTGGAAATTGATTAGTCCCTCTAATACTCGGGGCCCCAGATATGGCTTTCCCTCGATTAAACAATATAAGATTTTGATTATTACCCCCATCATTAACTTTACTAATTATAAGAAGAGCAGTTGAAAGAGGAGCAGGAACAGGTTGAACAGTTTATCCCCCTCTTTCTTCTAATATTGCCCATGGAGGTTCATCTGTTGATTTAGCTATTTTTAG…
RRMFE3056-15	BOLD:AAL0380	Hymenoptera	Ichneumonidae	Poemeniinae	Podoschistus vittifrons	AACATTATATTTTATTTTTGGAGCTTGAGCAGGAATAATTGGAACTTCATTAAGAATTATTATTCGAGCTGAATTAGGTCACCCAGGTAACTTAATTGGTAATGACCAAATTTATAATATAATTGTCACATCTCATGCTTTTGTAATAATTTTCTTTATAGTTATACCAATTATAATTGGAGGATTTGGAAATTGACTAGTACCCCTTATACTAGGAGCTCCTGACATAGCATTCCCTCGAATAAACAATATAAGTTTTTGATTATTGCCCCCATCCCTTACATTATTACTCATCAGCAGTATAGTAGAAACTGGAACTGGAACAGGTTGAACAATTTACCCTCCTCTTTCATCTACTATTGCACATAGAGGGGCATCTGTTGACTTAGCTATTTTTTC…
RRSSC6325-15	BOLD:AAA2368	Hymenoptera	Apidae	Xylocopinae	Ceratina	AACATTATATTTTATTTTAGGTAGATGATCAGCAATAATCGGAACTTCAATAAGATTAATTATCCGGACAGAATTAGGAAGGCCTGGTTCTTTAATTGGAGATGACCAAATCTATAATGTTGTTGTAACTGCTCATGCTTTTATTATAATTTTTTTTATAGTGATACCCATTATAATTGGGGGATTCGGAAATTGACTAGTACCCCTAATATTAGGAGCTCCTGATATAGCTTTTCCACGAATAAATAATATAAGATTTTGATTACTCCCCCCCTCATTAACATTATTAATTATAAGAAGAATTGTAGAAAACGGAGCAGGAACTGGATGAACAGTTTATCCTCCTCTATCATCAAATTTAACTCATAGAGGATCATCAGTAGATTTAGCTATTTTTAG…
RRMFA257-15	BOLD:ABZ2527	Hymenoptera	Apidae	Nomadinae	Nomada bella	AACTTTATATTTTATCTTTGGAGCTTGAGCAGGCATACTAGGAACTTCCTTAAGAATATTAATTCGTGCAGAATTAGGACATCCTGGCTCTTTACTTGGCAATGATCAAATTTATAATGTAATCGTGACTGCCCACGCTTTCATTATAATTTTTTTTATAGTAATACCAATTATAATTGGTGGATTTGGAAATTGATTAGTTCCTTTAATATTAGGAGCTCCTGATATAGCTTTTCCTCGAATAAATAATATAAGATTTTGAATGCTGCCACCTTCATTAACTTTATTATTAATAAGAAGAATAGTTGAAAATGGAGCTGGGACAGGATGAACTGTCTACCCTCCTTTATCTAGAACCCTATCCCATAGAGGAGGATCTGTTGACTTAGCTATTTTTTC…
RRSSA3945-15	BOLD:AAF7684	Hymenoptera	Ichneumonidae	Pimplinae	Theronia hilaris	AACATTATATTTTATTTTTGGAGCTTGATCAAGAATAATTGGAACTTCTTTAAGTATATTAATTCGAGTAGAATTAGGTCACCCTGGTTCTTTAATTGGAAATGATCAAATTTATAATGTAATTGTAACTGCTCATGCTTTTATTATAATTTTTTTTATAGTTATACCAATTATAATTGGTGGATTTGGAAATTGATTAGTTCCTTTAATATTAGGAGCTCCAGATATAGCTTTTCCTCGTATAAATAATATAAGTTTTTGACTCCTTCCTCCTGCTTTAATACTTTTATTAACAAGCAGTATAGTAGAAAGTGGAGCTGGAACAGGTTGAACAGTTTACCCCCCTCTATCTTCTATTATTGCTCATGGAGGAGCTTCTGTTGATTTAGCTATTTTTTC…
RRMFG2694-15	BOLD:AAH1693	Hymenoptera	Ichneumonidae	Cryptinae	Cryptus albitarsis	AACTTTATATTTTATTTTCGGAGCATGATCAGGAATAGTAGGAACTTCATTGAGAATTTTAGTTCGAGCTGAATTAGGTCATCCTGGAGCATTAATTGGAGATGATCAAATTTATAATGTAATTGTAACAGCTCATGCTTTTATTATAATTTTTTTTATAGTAATACCTATTATAATTGGAGGATTTGGAAATTGATTAGTTCCACTTATATTAGGTGCTCCTGATATAGCTTTTCCACGTATAAATAATATAAGTTTTTGACTTTTACCTCCTGCATTAACTTTATTATTACTAAGTAGTATAGTAGAAAATGGAGCTGGTACAGGATGAACTGTTTACCCTCCTCTGTCTTCTAATATTGCTCATAGAGGAGCTTCTGTTGATTTAGCCATTTTTTC…
RRGCO300-15	BOLD:AAA7249	Lepidoptera	Argyresthiidae	Argyresthiinae	Argyresthia oreasella	AACATTATATTTTATTTTTGCTTTATGGGCAGGGACTTTAGGAGCTTCAATAAGAATAATTATTCGCTTAGAATTAAGATCTCCTGGGGCCTTAATTAATAATGATCAAATTTATAATACAATTATTACAGCTCATGCCTTTATTATAATTTTCTTTATAGTTATACCTTTTTTAGTAGGAGGATTTGGAAACTGATTAATCCCTTTAATACTAGGTGTACCTGATATAGCATTTCCTCGAATAAATAATATAAGATTTTGATTACTCCCTCCTTCATTATTTTTACTAATTTTAAGAAATTTTATTGGAACAGGGGTAGGAACAGGATGAACTTTATACCCTCCTTTATCTTCTATTGTTGGTCATGATTCTCCATCTGTAGATTTAGGAATTTTTTC…
RRSSC6599-15	BOLD:AAH6827	Coleoptera	Scarabaeidae	Scarabaeinae	Onthophagus	AACATTATATTTTATTTTTGGAGCTTGAGCAGGAATAGTGGGAACTTCTTTAAGAATTTTAATTCGAGCTGAATTAGGACACCCTGGAGCTCTTATTGGTGATGATCAAATTTATAACGTAATTGTAACAGCTCATGCTTTTATTATAATTTTTTTTATAGTAATACCTATTATAATTGGAGGATTTGGAAACTGATTAGTTCCTCTTATATTAGGAGCCCCTGATATAGCTTTTCCTCGGATAAATAATATAAGTTTTTGACTTTTACCTCCTGCACTAACTTTACTATTAGTAAGTAGTATAGTAGAAAACGGAGCTGGAACTGGATGAACTGTTTATCCTCCATTATCTTCTAATATTGCTCATGGAGGAGCTTCTGTTGATTTAGCTATTTTTTC…
RRSSC4975-15	BOLD:AAA1257	Hymenoptera	Halictidae	Halictinae	Halictus ligatus	AACATTATATTTTATTTTTGGAGCTTGAGCTGGAATAGTCGGAACTTCTTTAAGTATATTAATTCGATTAGAATTAGGACATCCAGGAGCATTAATTGGTAATGATCAAACTTATAATGTTGTAGTTACAGCTCATGCTTTTATTATAATTTTTTTTATAGTAATACCAATTATAATTGGTGGATTTGGAAATTGATTAGTTCCTTTAATATTAGGAGCTCCAGATATAGCTTTCCCACGAATAAATAATATAAGTTTTTGATTACTTCCTCCTTCTTTAACATTATTATTAATAAGAAGTATAGTTGAAAATGGAGCTGGAACAGGATGAACCGTATATCCTCCTTTATCTTCAAATATTGCTCATAGAGGATCTTCAGTTGATTTAGCTATTTTTTC…
RRMFA256-15	BOLD:AAC5044	Hymenoptera	Apidae	Nomadinae	Nomada subrutila	AACTTTATATTTTATTTTTGGTATTTGAGCAGGTATAATTGGTACTTCTTTAAGTTTATTAATTCGAGCTGAATTAGGAAACCCTGGATCTTTAATTGGAGATGACCAAATTTATAATACTATTGTAACAGCTCATGCTTTCATTATAATTTTTTTTATAGTTATACCAATTATAATTGGAGGATTTGGAAATTGATTAGTGCCATTAATACTAGGAGCTCCAGACATAGCTTTCCCACGAATAAATAATATAAGATTTTGATTATTACCCCCCTCAATTATAATCTTAATCTCAAGAAGAATTGTAGAAAATGGAGCTGGAACTGGATGAACTGTATACCCTCCTTTATCATCTAATATTGCTCATGGAGGAAGATCTGTTGATTTAGCTATTTTTTC…
RRSSA4328-15	BOLD:AAB8645	Hymenoptera	Colletidae	Hylaeinae	Hylaeus	AACTTTATATTTCATTTTTGGAGTATGATCCGGCCTCTTAGGAACTTCATTAAGGGTAATCATTCGAACTGAACTTGGCACAATTAGATCTTTAATTAAAAATGACCAAATCTATAATGTAATAGTAACTGCCCATGCATTTATTATAATTTTTTTTATAGTAATACCTATTATAATTGGAGGGTTTGGAAACTGACTTGTTCCCCTAATACTAGGCGCACCAGACATAGCTTTCCCTCGAATAAATAATATAAGATTTTGACTACTTCCCCCTTCTTTAAATTTTCTTCTTCTTAGAAGAATAGTAGAAAGTGGAACCGGAACTGGTTGAACTGTATACCCCCCACTCTCTAGAAACATTGCTCACACAGGAGCTGCTGTTGACCTTTCAATTTTTTC…
RRSSC6591-15	BOLD:AAG4321	Coleoptera	Staphylinidae	Staphylininae	Tasgius melanarius	AACTTTATATTTTATTTTTGGAATTTGAGCAGGAATAGTAGGAACTTCATTAAGATTATTAATTCGAGCTGAATTAGGAACTCCTGGATCTTTAATTGGAGATGATCAAATTTATAATACTATTGTAACAGCTCATGCATTTATTATAATTTTTTTTATAGTAATACCTATCATAATTGGAGGATTTGGAAATTGATTAATTCCTTTAATATTAGGAGCTCCTGATATAGCTTTCCCTCGAATAAATAATATAAGTTTTTGATTATTACCTCCTTCTCTTACTCTTTTAATTTCTAGAAGAATTGTAGAAAATGGTGCAGGAACAGGATGAACAGTTTATCCCCCACTTTCATCTAATATTGCCCATGGAGGAAGATCTGTAGATTTAGCTATTTTTTC…
RRSSC2094-15	BOLD:ACE7001	Hymenoptera	Ichneumonidae	Anomaloninae	Agrypon flexorium	AACTTTATATTTTATTTTAGGAAGATGGGCTGGAATAATTGGAACTTCAATAAGTTTATTAATTCGTACAGAATTAGGAAATTCTGGCTCTTTAATCGGGGATGATCAAATTTATAATGTTATTGTTACTGCGCATGCTTTTATTATAATTTTTTTTATAGTTATACCAATTATAATCGGAGGATTCGGAAATTGATTAGTTCCTTTAATGTTAGGAGCTCCTGATATAGCTTTTCCACGAATAAATAATATAAGATTTTGATTATTACCTCCTTCTTTAACTTTATTAATTATAAGAAGAGTTGTTGAAAATGGTGCAGGGACTGGATGAACAGTCTATCCCCCCTTATCTTCAAATATTGCACATAGAGGATCTTCTGTAGATTTGGCAATTTTTAG…
RRSSC5051-15	BOLD:AAB0930	Hymenoptera	Colletidae	Hylaeinae	Hylaeus	AATTTTATATTTTTTATTTGGAATATGATCAGGAATAATTGGGTTATCAATAAGAATTATTATTCGTATAGAATTAAGTCAATCTGGTTCATTAATTGGAAATGATCAAATTTATAATAGATTTGTTACTACTCATGCTTTTATTATAATTTTTTTTATAGTTATACCAACTATATTAGGAGGATTTGGTAATTGATTAATTCCTTTAATATTAGGAAGAGTTGATATAGCTTTTCCTCGAATAAATAATATAAGATTTTGATTATTAATTCCTTCTTTATTATTATTATTATTAAGAGGATTTATAAATATTGGAGTAGGTACTGGATGAACTGTTTATCCTCCTTTATCTTTAAATATTAGACATATAGGTATATCAGTTGATATAGCTATTTTTTC…
RRGCO751-15	BOLD:AAE1659	Lepidoptera	Tineidae	Meessiinae	Homosetia fasciella	AACATTATATTTTATTTTTGGTATTTGAGCTGGAATAGTTGGAACTTCATTAAGATTATTAATTCGAGCTGAATTAGGAAATCCTGGATCTTTAATTGGAGATGATCAAATTTATAATACTATTGTTACAGCTCATGCTTTTATTATAATTTTTTTTATAGTTATACCTATTATAATTGGAGGATTTGGAAATTGACTTGTACCCTTAATATTAGGAGCTCCTGATATGGCATTTCCTCGAATAAATAATATAAGTTTTTGACTTCTTCCACCTTCTTTAACCTTATTAATTTCAAGAAGAATTGTAGAAAATGGAGCAGGAACAGGATGAACAGTTTACCCCCCACTTTCATCTAATATTGCTCACGGAGGAAGATCAGTAGACTTAGCTATTTTTTC…
RRSSA2321-15	BOLD:AAG5010	Hymenoptera	Braconidae	Rogadinae	Aleiodes	AACCTTATATTTTATTTTCGGAGCATGATCTGGAATAGTAGGAACTTCCTTAAGAATATTAGTACGAGCAGAATTAGGTCATCCTGGAGCATTAATTGGAAATGACCAAATTTATAATGTAATTGTAACAGCTCATGCTTTTATTATAATTTTTTTTATAGTTATACCAATTATAATTGGTGGATTTGGAAATTGACTAGTCCCTTTAATGTTAGGAGCCCCAGATATAGCCTTCCCTCGAATAAATAATATAAGATTTTGACTTTTACCTCCTGCTCTTACTCTTTTATTGGTGAGTAGTATAGTAGAAAATGGAGCTGGAACAGGATGAACTGTTTATCCCCCTCTATCTTCTAATATTGCTCATGGAGGAGCTTCTGTAGATTTAGCTATTTTTTC…
RRMFG2766-15	BOLD:AAH1652	Hymenoptera	Ichneumonidae	Campopleginae	Dusona minor	TATACTATATTTTATTTTTGGAATATGAGCTGGTATAATTGGATCTTCACTAAGAATAATTATTCGAATAGAATTAGGAAATCCTGGATTTCTAATTAATAATGATCAAATCTATAATTCAATCGTTACAAGTCATGCCTTTATTATAATTTTTTTTATAGTAATACCTATTATAATTGGAGGTTTTGGTAATTGATTAATTCCTCTTATATTAGGAGCTCCTGATATAGCATTCCCTCGAATAAATAATATAAGTTTTTGATTATTACCTCCATCAATTTTTCTATTATTAAATAGTAATATTATAAATCAAGGAACTGGAACTGGATGAACATTATATCCACCTTTATCTTCAAATTTAAATCATGAAGGAATTTCAGTAGATTTAACAATTTTCTC…
RRMFG2688-15	BOLD:ACE6524	Hymenoptera	Apidae	Nomadinae	Nomada	AACTTTATATTTTTTATTTGGAACATGAGCTGGAATAGTAGGAACATCCTTAAGAATTTTAATTCGTGCAGAATTAGGTCATCCTGGAGCATTAATTGGGGATGATCAAATTTATAATGTAATTGTTACTGCTCATGCTTTTGTAATAATTTTTTTTATAGTAATACCAATTATAATTGGAGGATTCGGAAATTGATTAGTTCCATTAATATTAGGAGCACCTGATATAGCATTTCCTCGAATAAATAATATAAGTTTTTGATTATTACCTCCTTCTTTAACTTTATTATTAGTAAGAAGAATAGTAGAAAATGGAGCTGGAACTGGTTGAACAGTTTACCCTCCTTTATCTGCAAGAATCGCTCATGGAGGAGCTTCAGTTGATCTAGCAATTTTTTC…
RRMPG967-15	BOLD:AAG7874	Hymenoptera	Crabronidae	Pemphredoninae	Pemphredon inornata	TACATTATATTTTATTTTTGGGGCTTGAGCCGGAATAATTGGAACTTCATTAAGAATTTTAATTCGGGCCGAATTAGGACACCCTGGGGCATTAATTGGGGATGATCAAATTTATAATGTTATTGTAACTGCCCATGCATTTATTATAATTTTTTTTATAGTTATACCTATTATAATTGGAGGTTTTGGAAATTGATTAGTTCCACTTATACTAGGAGCCCCTGATATAGCATTTCCACGAATAAATAATATAAGTTTTTGAATACTTCCCCCTTCTTTAACATTATTATTAGCCAGTAGTATGGTTGAAAATGGTGCTGGAACAGGTTGAACAGTTTATCCCCCACTATCTGCTGGAATTGCCCATACTGGAGCTTCTGTAGATCTTGCTATTTTTTC…
RRMFG2666-15	BOLD:ABA5978	Hymenoptera	Ichneumonidae	Anomaloninae	Erigorgus xanthopsis	CACTCTATATTTTATTTTTGGAGCTTGAGCAGGATTAGTAGGTACTTCTTTAAGAATAATTGTACGATTAGAATTAAATCATCCTAATTCATTTATTGGAAATGACCAAATTTATAACTCAATTGTAACCGCCCATGCATTTATTATAATTTTTTTTATAGTAATACCTATTATAATTGGAGGATTCGGGAATTGATTAATTCCCCTAATATTAGGAGCTCCTGATATAGCTTTTCCTCGAATAAATAATATAAGATTTTGATTACTTCCACCTTCCATTACATTACTATTACTAAGCAGAATAATCGAAAATGGAGTAGGTACAGGATGAACTGTTTATCCTCCCTTATCAGCATCTATTGCTCACAGAGGAGCATCTGTTGATTTAGCAATCTTCTC…
RRGCO481-15	BOLD:AAD3996	Lepidoptera	Gracillariidae	Gracillariinae	Acrocercops astericola	AACCCTATATTTAATGTTCGGAGCATGAGCAGGTATAGTAGGAACTGCTTTAAGAATATTAATTCGAGTTGAACTCGGACAACCAGGATCTCTAATTGGAGATGATCAAATTTATAATGTAGTAGTAACTGCACACGCTTTTGTTATAATTTTTTTTATAGTAATACCAATCATAATTGGTGGGTTCGGAAATTGGTTAGTACCACTAATATTAGGGGCACCAGATATGGCTTTCCCTCGATTAAATAATATAAGATTTTGACTCTTACCTCCATCTTTAACCCTTCTTCTAGCAAGAAGATTAGTAGAAAGAGGAGCTGGAACTGGTTGAACTGTTTACCCTCCGTTAGCAGGAGTTATTGCTCATGCTGGAGCGTCAGTAGATTTAACAATTTTTTC…
RRMPG954-15	BOLD:AAZ4669	Diptera	Tachinidae	Exoristinae	Oswaldia assimilis	TACATTATATTTTATTTTTGGAGCTTGAGCAGGAATAGTAGGAACCTCTCTTAGTATAATAATTCGGGCCGAATTAGGACATCCCGGATCTTTAATTGGTGATGATCAAATTTATAATGTAATTGTTACTGCCCATGCATTTATTATAATTTTCTTTATAGTTATACCTATTATAATTGGAGGATTTGGTAATTGATTAGTTCCCTTAATATTAGGGGCTCCTGATATAGCATTTCCTCGAATAAATAATATAAGTTTCTGAATACTTCCTCCTTCTTTAACCCTTTTGTTGGCAAGTAGTGTAGTAGAAAATGGAGCTGGAACAGGATGAACTGTATATCCTCCCCTATCAGCTAGAATTGCTCATGGTGGAGCTTCAGTTGATTTAGCAATTTTTTC…

## Sheet: B) Run I; Mock sample
ID	1	2	3	4	5	6	7	8	9	10	11	12	13	14	15	16	17	18	19	20	21	Sequ
RRGCO236-15|Clostera	17149	33187	41136	11195	41850	35252	21445	20375	30882	1047	12735	14188	27919	22396	19723	30933	23201	8530	11519	5321	4971	AACATTATATTTTATTTTTGGAATTTGAGCAGGAATAGTTGGAACCTCTTTAAGTTTATTAATTCGAGCTGAATTAGGAAATCCTGGATCTTTAATTGGAGATGATCAAATTTATAATACTATTGTTACAGCTCATGCTTTTATTATAATTTTTTTTATAGTTATACCTATTATAATTGGAGGATTTGGTAATTGATTAGTTCCTTTAATATTAGGAGCCCCTGATATAGCTTTTCCTCGAATAAATAATATAAGTTTTTGACTCCTACCCCCCTCATTAACTTTATTAATTTCAAGAAGAATTGTAGAAAATGGAGCAGGAACAGGATGAACAGTTTACCCCCCACTTTCATCTAATATTGCACATGGAGGAAGATCAGTTGATTTAGCTATTTTTTC…
RRMFG2297-15|Ontholestes	152492	19013	174	28219	26744	5383	15186	11671	5328	80	930	33957	630	21748	18485	6365	7955	2136	37858	9935	4285	AATATTATATTTCATTTTTGGAATATGAGCTGGTATAATAGGAACTTCAATAAGATTAATTATTCGACTAGAACTAGGGAATCCCGGATTTTTAATTAATAATGATCAAATTTATAATTCCTTAGTAACTTCACATGCCTTCATCATAATTTTTTTTATAGTTATACCTATTATAATTGGAGGATTTGGTAATTGATTAATCCCTTTAATAATTGGGGCCCCTGATATAGCTTTCCCACGAATAAATAATATAAGATTTTGATTATTACCCCCTTCAATCTTTATTTTAATTTTAAGAAGAATAACAAACCAAGGAGCCGGAACTGGATGAACAGTTTATCCCCCTTTATCTCTCAATTTAAGACATGAAGGCATATCTATTGATTTAGCTATTTTTTC…
RRMFI4231-15|Panorpa	127353	22545	4240	14082	10699	13272	22464	17272	17710	11567	3743	1455	24968	7525	5980	3414	4694	35235	14258	12918	11799	AACTTTATATTTTATTTTCGGAGCATGATCCGGAATAATTGGAACTTCATTAAGAATTTTAATTCGAACTGAATTAGGACATCCTGGTTCATTAATTGGTGATGATCAAATTTATAATGTAATTGTTACAGCTCATGCATTTATTATAATTTTTTTTATAGTAATACCAATTATAATTGGAGGATTTGGAAATTGACTAGTTCCATTAATATTAGGAGCTCCAGATATAGCTTTTCCACGAATGAATAATATAAGTTTTTGACTTCTTCCTCCCTCTTTAACACTTTTGTTAGCCAGTAGTATAGTTGAAAACGGAGCTGGAACAGGATGAACAGTTTATCCACCTTTATCATCAGTAATTGCACATGGTGGAGCTTCTGTTGATTTAGCAATTTTTTC…
RRMFI4062-15|Laphria	69804	48867	6879	58498	26012	3361	12761	10437	7414	4182	1798	22622	18758	14819	17275	10939	7848	17796	7039	7184	8472	AACTTTATATTTTATTTTTGGAGCTTGATCAGGAATAATTGGAACTTCATTAAGAATTTTAATTCGTACTGAATTAGGACACCCTGGGTCATTAATTGGAAATGACCAAATTTATAATGTTATTGTTACAGCTCATGCTTTTATTATAATTTTTTTTATAGTAATACCAATTATAATTGGAGGATTTGGTAATTGATTAGTTCCATTAATATTAGGAGCTCCAGATATAGCATTCCCACGAATAAATAATATAAGTTTTTGAATACTTCCTCCTGCTTTAACACTTTTATTAGTAAGTAGTATAGTAGAAAATGGAGCTGGTACAGGTTGAACAGTTTACCCTCCTTTATCTTCTGTAATTGCTCATGGTGGAGCTTCTGTAGATTTAGCAATTTTTTC…
RRMFG2298-15|Melanotus	9	30547	0	15506	3861	23861	41173	29302	26903	1856	6550	52199	181	20627	13268	3883	1994	9	4776	4755	21351	AACATTATATTTTATCTTTGGAGCTTGAGCAGGAATAGTAGGAACTTCATTAAGAGTGTTAATTCGAGCAGAATTAGGAAACCCTGGATCATTAATTGGGGATGACCAAATTTATAATGTTATTGTTACTGCACATGCTTTTGTAATAATTTTTTTTATAGTTATACCAATTATAATCGGAGGATTTGGAAATTGATTAGTTCCACTAATATTAGGAGCTCCTGATATAGCATTCCCTCGAATAAATAACATAAGTTTTTGATTACTCCCTCCTTCATTAACATTACTTTTAATGAGCAGTTTAGTAGAAAGAGGGGCTGGGACAGGATGAACAGTATACCCTCCCCTATCATCAGGAATTGCACATAGAGGAGCATCTGTAGATTTAGCAATTTTTAG…
RRSSC7195-15|Euschistus	0	18032	62633	13813	3887	28351	23988	20018	18271	80010	12837	12111	12	9034	5317	1060	2327	18545	3458	3434	3047	AACTTTATACTTCATTTTCGGGGCCTGATCAGGAATAATTGGAACTTCCCTAAGAATCTTAGTTCGAGCCGAATTAGGTCACCCGGGGGCATTAATCGGAGATGACCAAATTTATAACGTAATTGTGACAGCCCACGCCTTTATTATAATTTTTTTTATAGTAATACCAATTATAATTGGGGGATTTGGAAATTGACTAGTGCCTATTATACTAGGAGCACCTGATATGGCTTTCCCCCGAATAAATAATATAAGTTTCTGATTGCTTCCCCCAGCCTTAACACTACTCCTAATAAGTAGTATAGTAGAAAATGGAGCTGGGACAGGTTGAACAGTTTACCCACCCTTATCATCTAATATCGCCCATGGAGGGGCATCAGTAGACCTAGCGATTTTTTC…
RRGCO456-15|Xestia	36250	30213	1340	31470	14303	18740	18673	18361	28409	2650	28190	17705	21069	11780	10411	21934	7501	60	3973	5055	4374	AACTTTATATTTTATTTTTGGAATTTGAGCAGGAATAATCGGAACATCTTTAAGTTTATTAATTCGAGCTGAATTAGGTAGCCCCGGCTCTTTAATTGGAGATGATCAAATTTATAATACCATTGTTACAGCTCATGCTTTCATTATAATTTTTTTTATGGTTATGCCAATTATAATTGGAGGATTTGGAAATTGATTAGTACCTTTAATATTAGGAGCTCCTGATATAGCATTCCCTCGGATAAATAATATAAGATTTTGGTTACTCCCCCCCTCAATCACTTTATTAATTTCTAGAAGAATTGTAGAAAATGGAGCCGGTACAGGATGAACAGTTTACCCCCCCCTATCTTCTAATATTGCCCATGGAGGAAGATCTGTTGATTTAGCTATTTTTTC…
RRMFI4070-15|Graphomya	12308	14807	25766	20585	27851	15738	16886	13920	14755	18054	5152	19457	19122	15594	16197	3450	18924	17132	1966	2369	4985	AACTATATATTTTATTTTTGGAATTTGATCAAGAATTTTAGGATCTACTTTAAGATTTATTATTCGAATTGAATTAAGAACTTCAGGTTCATTAATAACAAATGATCAGATTTATAATTCAATTGTTACATTACATGCTTTTATTATAATTTTTTTCATAATTATACCATTAATAATTGGAGGATTTGGAAATTGATTAGTTCCTTTAATATTATCAGCTCCTGATATAGCATTTCCTCGAATAAATAATATAAGATTTTGATTACTACCTCCTTCTATTTTTTTCCTAATTTCTGCAGTCTTTATAGATAATAGAGTAGGAACAGGTTGAACTGTTTACCCTCCTTTATCAAATAATTTATTTCATTCAGGAAAGTCAGTTGATATTTCAATTTTTTC…
RRMFG2355-15|Melanoplus	12416	10213	673	35549	26356	12644	17246	11235	17320	3458	23853	13196	21806	7329	7871	10074	11743	22715	11288	3739	2368	TATTTTATATTTTATTTTCGGAATATGAGCAGGAATAATTGGTTCATCAATAAGAATTATTATTCGTATAGAATTGGGTAATCCAGGATTTTTAATTAATAATGATCAAATTTACAATTCTATTGTTACTGCTCATGCATTTATTATAATTTTTTTTATAGTAATACCTATTATAATTGGTGGATTTGGAAATTGATTAATTCCATTAATATTAGGAGCTCCTGATATAGCCTTTCCACGAATAAATAATATGAGATTCTGATTATTACCTCCCTCAATTATATTAATTATTTCTAGAAGAATAATTAATCAAGGAGTTGGGACAGGCTGAACAGTTTATCCCCCTTTATCTTCTAATTTAAATCATGAAGGTATATCTGTAGATTTAGCTATTTTCTC…
RRMFC1998-15|Ampedus	5415	10083	3578	54700	1780	9536	8634	6490	9316	4525	7508	25367	38409	13355	10038	3095	2423	6031	8469	10448	10315	CACTTTATATTTTATATTTGGAATTTGATCAGGATTAGTAGGATCTTCTCTTAGTTTTATTATTCGAATAGAATTAAGAACTCCAGGAAGATTTATTGGAAATGACCAAATTTATAATGTGATTGTAACTTCTCATGCTTTTATTATAATTTTCTTTATAGTTATACCAATTATAATTGGGGGGTTCGGAAATTGACTAGTACCCTTAATATTGGGATCACCTGATATAGCTTTTCCTCGAATAAATAATCTTAGATTTTGATTCCTTCCCCCATCTCTTATTTTTTTATTATTAAGAAGTATAACTAATTCTGGAGCTGGGACAGGATGAACTGTCTATCCTCCTCTATCTTCTAATTTATCTCATGCAGGCAGATCAGTTGATTTAACTATTTTTTC…
RRSSA2290-15|Ampedus	2330	29671	3	55665	36398	2069	9633	8827	3488	4096	935	17785	10862	9467	9296	20023	13546	1341	6511	4419	7049	AACATTATATTTTATTTTTGGTATTTGAAGAGGAATACTAGGAACTTCTTTAAGATTATTAATTCGAGCAGAATTAGGTAATCCTGGTTATTTAATTGGTGACGATCAAATTTATAATACTATTGTAACAGCTCATGCTTTTATTATAATTTTTTTTATAGTTATACCTATTATAATTGGAGGATTTGGAAATTGATTAGTCCCTTTAATATTAGGTGCTCCAGATATAGCTTTTCCCCGTATAAATAATATAAGTTTTTGATTATTACCTCCTTCTATTATACTTTTAATTTCAAGAAGAATTGTAGAAAATGGAGCAGGAACTGGATGAACAGTATACCCCCCACTTTCATCAAATATTGCCCACAGAGGAAGTTCTGTAGACCTAGCAATTTTTTC…
RRMFI4225-15|Tomoxia	27508	29869	2	60909	15524	2198	23900	20345	10729	820	80	12913	249	19764	19665	12840	5423	0	1140	4280	5877	AATTTTATATTTTATTTTTGGTATATGAGCCGGAATAAATGGATCATCAATAAGTATTATTATTCGAATAGAATTAGGTAATCCAGGTTATTTAATTAATAATGATCAAATTTATAATTCAATTGTAACAGCTCATGCTTTTATTATAATTTTCTTTATAGTAATACCTATTATAATTGGTGGATTTGGAAATTGATTAATTCCTTTAATATTAGGAGCTCCTGATATAGCTTTCCCTCGAATAAATAATATAAGATTTTGATTATTACCACCATCTATTTTTATATTAATTTTTAGAAGAATTACTAATCAAGGTATAGGAACTGGATGAACTGTTTATCCACCTTTATCTTCTAATTTAAATCATGAAGGTATATCAGTTGATTTAGGAATTTTTTC…
RRGCO355-15|Gluphisia	17817	6719	3323	7746	9601	29698	16031	19096	18639	1079	4892	11968	9898	18883	15350	20914	14596	6391	6143	2281	2415	CACACTATACTTTATTTTCGGACTATGATCAGGACTAATTGGCTCCTCTCTCAGTTTAATTATTCGTACAGAATTAAGAACCCCAGGAAGATTAATTGGAAATGATCAAATCTATAATGTAATCGTTACAGCTCACGCTTTCATTATAATTTTTTTTATAGTTATACCTATTATAATCGGGGGATTCGGAAACTGATTAGTTCCTCTAATGCTAGGAGCCCCAGATATGGCCTTCCCACGAATAAATAATATAAGATTTTGATTCCTCCCTCCCTCTTTAATATTCCTAATCTTTAGCAGCTTAATTAACAACGGAGCAGGCACAGGATGAACAGTGTACCCTCCGTTATCATCAAACCTCTCTCATCTAGGAAGATCCGTCGATCTTACAATTTTCTC…
RRSSA4306-15|Panorpa	23830	2888	4140	2553	1675	1154	2642	2082	1620	177721	356	176	2604	1051	975	519	743	4522	1916	1408	1221	AACATTATATTTTATTTTTGGAGCCTGAGCTGGAATAGTTGGAACTTCACTAAGTATACTAATTCGAGCTGAATTAGGACACCCTGGAGCATTAATTGGAGATGACCAAATTTATAATGTAATTGTAACAGCCCATGCTTTTATTATAATTTTTTTTATAGTTATACCAATTATAATTGGAGGATTTGGTAATTGATTGGTACCTTTAATATTAGGGGCCCCAGATATAGCCTTCCCACGTATAAATAATATAAGATTTTGAATATTACCTCCTTCTTTAACTTTACTTTTAGCTAGAAGTATAGTTGAAAATGGAGCCGGTACTGGATGAACTGTTTATCCTCCATTAGCTTCTGGAATTGCACATACTGGAGCTTCTGTTGATTTAGCAATTTTCTC…
RRMFI4078-15|Sericomyia	23953	26338	22008	9093	8458	17332	16630	13759	21142	2248	16484	8925	2885	4441	3550	1338	3101	17396	10367	4176	3753	AACATTATATTTTATTTTTGGAGCATGAGCAGGGATAGTAGGAACTTCATTAAGTATATTAATTCGAGCTGAATTGGGGACTCCTGGTGCATTGATTGGTGATGATCAAATTTATAATGTTATTGTTACTGCACATGCTTTTATTATAATTTTTTTTATAGTTATACCTATTATAATTGGAGGATTTGGTAATTGATTAGTACCTTTAATATTAGGTGCTCCTGATATAGCTTTTCCTCGTATAAATAATATAAGTTTTTGATTATTACCTCCTTCTTTAACTCTTCTTTTAATAAGAAGAATAGTAGAAAGTGGTGCTGGAACTGGATGAACAGTTTATCCACCTTTATCATCTGGTATTGCTCATGGAGGAGCTTCAGTAGATTTAGCAATTTTTAG…
RRGCO229-15|Raphia	16122	15394	19054	6763	22025	8474	14048	13497	15356	780	5775	12583	15341	7873	7885	14816	9201	3783	5665	2511	2836	AACAATATACTTCTTGTTTGGAATTTGATCAGGAATAGTAGGAATAATATTAAGTATAATTATTCGGATTGAGTTAGCTCAGCCAGGATCATTTTTAAATAATGATCAAATATATAATGTAATTGTTACATCTCACGCTTTTATTATAATTTTCTTTATAGTTATACCAATCATAATTGGTGGATTTGGTAACTGACTCTTACCTCTTATAATTGGAGCACCAGATATAGCATTTCCACGACTAAATAATATAAGATTTTGACTTTTACCACCTTCATTAACATTATTACTTTCAAGATCATTAATTGAAATAGGAGTAGGAACAGGATGAACAGTTTACCCTCCATTATCTAGATTTATTCACCATTCAGGACCAAGAGTTGATATATCTATTTTTTC…
RRMFI4216-15|Clytus	0	9435	0	45411	33054	5483	10186	6844	10012	0	3053	5353	28454	14002	16060	80	11232	18	7045	18	4510	AACTTTATATTTTGTATTTGGTACATGAGCAGGAATAGTAGGTACATCCCTAAGTATATTAATTCGTATAGAACTTGGTCATCCAGGAGCATTAATTGGTGATGATCAAATTTATAATGTAATTGTTACTGCCCATGCATTTGTAATAATTTTTTTTATAGTTATACCAATTATAATTGGAGGATTTGGAAACTGACTAGTTCCCCTTATATTAGGAGCTCCAGATATAGCATTCCCTCGAATAAATAATATAAGTTTTTGATTATTACCTCCTTCATTAACTCTATTATTAATAAGAAGAATAGTAGAAAACGGAGCTGGAACAGGATGAACAGTCTACCCTCCTCTTTCAAGAAATATTGCTCATAGAGGGGCATCTGTAGATTTAGCAATTTTTTC…
RRSSA3968-15|Pyractomena	26423	1019	57365	3616	1345	9729	7465	7250	10398	532	54318	12650	10095	3991	3884	3738	7735	13542	1583	1399	971	AACTCTCTACTTCATTTTTGGCGCTTGAGCTGGAATAGTTGGCACATCCCTAAGAATTTTAATTCGTGCTGAACTAGGACACCCAGGAGCTTTAATTGGAGATGACCAAATTTATAATGTAATTGTTACTGCTCATGCTTTTGTAATAATTTTCTTTATAGTTATGCCCATTATAATTGGAGGATTTGGAAACTGGCTAGTACCCCTAATGCTAGGAGCCCCAGATATAGCCTTTCCTCGAATAAACAATATAAGCTTTTGACTTCTTCCACCCTCTTTAACCCTTCTCCTCGTTAGAAGAATAGTTGAAAATGGCGCCGGGACTGGATGAACCGTTTACCCCCCGTTATCTTCTGTAATTGCCCATGGAGGAGCTTCTGTTGATTTAGCAATTTTTAG…
RRMFC1666-15|Vespula	1	35043	99	4140	3404	3237	19490	13460	19175	0	1	34130	7584	9863	2852	2335	2175	35715	62	3036	1661	AACTTTATATTTTATTTTTGGAGCATGAGCAGGAATAGTAGGAACTTCATTAAGAATATTAATCCGTGCAGAATTAGGAAACCCTGGAGCATTAATTGGAGATGACCAAATTTATAATGTTATTGTTACTGCACATGCTTTTATTATAATTTTTTTTATAGTAATACCTATTATAATTGGAGGATTTGGAAATTGATTAGTTCCTTTAATATTAGGAGCACCAGATATAGCCTTTCCTCGAATAAATAATATAAGATTTTGACTTCTACCTCCATCATTAACCCTCCTTTTAATGAGAAGCCTTGTGGAAAGAGGTGCAGGTACAGGATGGACTGTCTACCCCCCACTCTCTTCAGGAATTGCACATGCTGGAGCATCAGTTGATTTAGCTATTTTTAG…
RRSSA234-15|Sarcophaga	6788	20189	205	9256	46450	6826	6897	6940	5873	161	2773	10041	14519	10257	8261	12720	9936	3782	6320	1654	1205	AACATTATATTTTATTTTCGGAGCGTGATCCGGAATAATTGGAACTTCTTTAAGTATTTTAATTCGAGCTGAATTAGGACACCCTGGAGCATTAATTGGTGATGATCAAATTTATAATGTAATTGTAACTGCTCATGCCTTTATTATAATTTTTTTTATAGTAATGCCAATTATAATTGGAGGATTTGGTAATTGACTAGTGCCTCTTATACTAGGTGCTCCTGATATAGCTTTCCCTCGAATAAATAATATAAGTTTTTGACTTTTACCTCCTGCACTAACTTTATTGTTAGTAAGTAGTATAGTAGAAAACGGAGCTGGAACAGGATGAACTGTTTACCCTCCGTTATCTTCAAATATTGCTCATGGAGGAGCTTCTGTTGATTTAGCAATTTTTTC…
RRMFD032-15|Dasysyrphus	9342	14953	59089	19647	6425	2227	5296	3912	2897	22104	23264	5077	5106	4012	3123	1110	2806	10265	5116	2548	1809	AACCTTATATTTTATTTTTGGAGCATGATCAGGATCCCTTGGCTTAGCATTAAGTCTTCTAATTCGAGCAGAATTAGGAACTCCAGGTACTCTTATTGGAAATGACCAAATTTATAATGTTATTGTAACAGCACATGCTTTTATTATAATTTTCTTTATAGTTATACCTATCATAATTGGGGGATTTGGAAATTGATTAGTACCTTTAATATTAGGGGCCCCTGACATGGCATTTCCTCGTATAAATAACATGAGATTTTGATTTTTACCTCCTTCACTTATATTTTTATTAATAAGAAGAATAGTAGAAAGAGGAGCAGGAACAGGATGAACTGTTTATCCTCCTCTGTCAGCTAATATTGCTCATAGAGGACCATCAGTTGATTTAGCTATTTTTAG…
RRSSA235-15|Temnostoma	35067	40745	42643	13581	6673	4213	7218	7024	3154	2466	17099	6615	4727	7666	8093	856	3207	10485	3941	1251	2519	AACTTTATATTTTATTTTTGGTGCTTGAGCAGGAATAGTAGGAACTTCATTAAGAATATTAATTCGAGCTGAATTAGGAAATCCTGGATCATTAATTGGTGATGATCAAATTTATAATGTTATTGTAACTGCTCATGCATTTGTTATAATTTTTTTTATAGTAATACCTATTATAATTGGAGGATTTGGAAATTGATTAGTCCCTTTAATATTAGGAGCTCCTGATATAGCTTTTCCTCGAATAAATAATATAAGTTTTTGACTTCTTCCTCCTTCATTAACTCTTCTTTTAATGAGAAGTATAGTTGAAAGTGGAGCTGGTACTGGATGAACAGTTTACCCCCCTTTATCTTCAGGAATTGCCCATGCTGGAGCTTCAGTTGATTTGGCTATTTTTAG…
RRMPA007-15|Platycheirus	18372	14687	11323	8356	1623	11456	13258	10797	14880	798	7658	5335	6014	6424	5949	972	3077	14716	9655	5447	4382	AACTTTATATTTTATGTTCGGAATATGATCGGGAATAATTGGAATAATATTAAGAATAATTATCCGTGTTGAATTAGGGCAACCCGGACCATTTATTAACAATGATCAAATTTACAACACAATCATTACATCACATGCATTTATCATAATTTTCTTTATAGTAATACCTATCATAATTGGGGGATTTGGTAACTGACTATTACCTATTATAATCGGAGCACCAGATATAGCATTTCCTCGAATAAATAACATAAGATTTTGACTTTTACCACCATCAATTAAACTTCTATTGATTAGATCATTAGTAGAATCTGGTGTTGGAACAGGGTGAACAGTATATCCACCACTGTCTAGTAATATTGGACATTCTGGACCAAATGTTGAATTTGCAATTTTTTC…
RRMFE2534-15|Boettcheria	35214	14420	6687	3654	10589	12263	14460	13436	15506	10471	230	9603	2462	7813	8083	4138	6539	13946	4994	1049	1099	AACTTTATATTTTATTTTTGGATTTTGATCTGGAATATTAGGTTTATCATTTAGATTATTAATTCGAACAGAACTTGGAATACCTGGATCTATAATTGGAGATGATCAAATTTACAATGTAATTGTAACATCCCATGCATTCTTAATAATTTTTTTTATAGTTATACCTATCATAATTGGAGGATTTGGGAATTGATTAATCCCTTTAATATTAGGAGCCCCTGATATAGCATTCCCACGTCTTAATAACATAAGATTTTGATTTTTACCTCCTTCATTAATTTTATTATTATCTAGAAGAATAGTAAATTCAGGATCAGGAACAGGATGAACAGTTTATCCTCCTTTATCTAGAAGAATATCCCATGCAGGAGCATCAGTTGATTTAACAATTTTTTC…
RRGCO547-15|Neodactria	8134	23932	6965	2863	21909	7304	10656	8348	11933	481	5849	9639	12951	3876	3353	9645	9058	3363	6093	1832	1990	AACTTTATATTTTATTTTTGGAATTTGAGCCGGTATAATTGGAACTTCTTTAAGATTACTAATTCGAGCTGAATTAGGAAACCCCGGATCTTTAATTGGAGACGACCAAATTTATAATACCATTGTAACAGCTCATGCTTTCATTATAATTTTTTTTATAGTTATACCAATCATAATTGGAGGATTTGGTAATTGATTAGTACCTCTGATACTAGGAGCTCCTGATATGGCTTTTCCACGAATAAACAATATAAGATTCTGATTACTCCCCCCATCTATTACTCTTCTAATTTCGAGAAGAATTGTAGAAAATGGAGCTGGAACTGGTTGAACAGTTTACCCCCCTTTATCTTCAAATATTGCTCATGGAGGAAGTTCTGTTGATTTAGCTATTTTTTC…
RRMFE3344-15|Limonia	7663	8446	295	4300	3139	6110	9850	7891	11973	16820	31585	1773	9513	5581	3430	1971	3302	14551	6389	2695	2542	AACATTATATTTTATTTTTGGTATTTGAAGAGGGATATTAGGAACTTCTTTAAGATTATTAATTCGAGCAGAATTAGGTAATCCTGGTTATTTAATTGGTGACGATCAAATTTATAACACTATTGTAACAGCTCATGCTTTTATTATAATTTTTTTTATAGTTATACCTATTATAATTGGAGGATTTGGAAATTGATTAGTTCCTTTAATATTAGGTGCTCCGGATATAGCTTTCCCCCGTATAAATAATATAAGTTTTTGATTATTACCTCCTTCTATTATACTTTTAATTTCAAGAAGAATTGTAGAAAATGGAGCAGGAACTGGATGAACAGTATACCCCCCACTTTCATCAAATATTGCTCATAGAGGTAGTTCTGTAGACCTAGCAATTTTTTC…
RRSSA2292-15|Ampedus	818	17640	1	35977	1796	6607	27131	14481	15076	2972	842	4226	980	9055	8131	1113	2280	706	6577	3719	5452	AACTTTATATTTCATTTTTGGTACATGGTCAGGAATAGTAGGAACTTCCCTCAGTCTACTAATTCGAGCCGAACTAGGAAACCCTGGATCTTTAATTGGTAACGATCAAATCTACAACGTTATCGTAACAGCCCATGCATTTGTAATAATTTTTTTCATGGTTATACCAATTGTAATTGGTGGATTTGGAAATTGATTAGTTCCCTTAATACTCGGGGCTCCTGATATAGCTTTTCCTCGAATAAACAATATAAGATTTTGACTTCTCCCTCCGTCATTAAATTTATTGCTTACTAGAAGAATAGCTGAAAGAGGAGCAGGAACTGGTTGAACAGTTTATCCACCTCTATCAGCAAATGTTGCTCATAGAGGAACTTCTGTTGATTTAGCAATTTTCAG…
RRSSA2333-15|Pterostichus	54794	14214	38	4768	9298	19992	11532	11411	15395	1871	7158	3099	4801	6464	4922	1453	3832	12988	5702	1584	722	AACTCTTTATTTTATTTTTGGAGCTTGATCAGGTATAATTGGCACATCTTTAAGATTATTAATTCGTTCAGAATTAGGTAATCCAGGATCTCTAATTGGAGATGATCAAATTTATAATGTAATTGTTACAGCACATGCTTTTATTATAATTTTTTTTATAGTAATACCTATTATAATAGGAGGATTTGGAAATTGATTAGTGCCCCTAATATTGGGAGCTCCTGATATAGCTTTCCCCCGAATAAATAACATAAGATTTTGACTTTTACCACCTTCTCTTACTTTACTTTTAATAAGAAGAATTGTGGAAAACGGGGCAGGAACTGGATGAACAGTTTACCCACCATTATCTTCAAATATTGCCCATAATGGTTCATCAGTTGATTTAACAATTTTTAG…
RRMFG3290-15|Enallagma	27252	5987	696	1647	9686	14891	10260	9336	10950	12378	34739	734	59	4005	1310	4779	6217	130	7261	2733	2103	AACCCTCTACTTTATCTTTGGTGCGTGAGCAGGAATACTAGGTACATCCCTAAGCCTACTCATCCGTGCCGAACTAGGAAACCCTGGGTCTCTAATTGGTAACGACCAAATCTACAACGTTATTGTTACCGCACACGCATTCATCATAATTTTCTTTATAGTTATACCAATCATGATTGGAGGATTCGGAAATTGGTTAGTTCCATTGATACTAGGAGCCCCAGATATAGCTTTCCCTCGAATAAATAACATAAGATTCTGGCTATTACCACCTTCATTAAGACTTTTACTAATAAGAAGAATTGTAGAAAACGGAGCAGGAACAGGATGAACTGTGTACCCACCACTATCATCTAATATTGCCCACAGAGGTTCCTCTGTAGACCTTGCAATTTTTAG…
RRSSC1963-15|Symphoromyia	5334	5599	2964	2053	845	18704	15314	13901	18819	17938	1554	9368	8639	4353	4762	3708	5025	10776	1482	1966	1494	AACATTATACTTCATTTTCGGAGCATGGGCTGGATTAGTAGGTACAGCCTTAAGAATAATTATCCGAATAGAATTAAGAACACCAGGACACCTAATTAATGATGATCAAATTTATAATGTAGTAGTAACGGCTCACGCATTTATTATAATCTTTTTTATAGTAATACCAATTATAATTGGAGGATTTGGTAATTGATTAGTCCCCTTAATAATTGGAGCCCCAGACATAGCATTTCCGCGAATAAATAATATAAGATTTTGACTATTACCACCATCATTAATATTATTAATTTCTAGTAGAATTGTAGATACAGGTGTAGGAACTGGATGAACTGTTTATCCACCCTTAGCAGGACCTATTGCACACAGCGGGGTAGCAGTAGATTTAGCTATTTTTTC…
RRSSC4804-15|Colias	41979	3917	38719	18520	744	14632	6268	6131	9090	1012	7696	2008	4719	6108	4810	7768	9489	1540	2027	1227	1119	AACCCTTTACTTCGTCTTTGGGGCATGAGCAGGAATAGTAGGAACATCCCTAAGAGTTTTAATCCGATCAGAACTGGGAAATCCAGGATCCTTAATTGGAGATGATCAAATTTACAATGTAATCGTAACAGCCCATGCATTTATCATAATTTTCTTTATAGTTATACCAATCATAATTGGAGGATTCGGAAATTGATTAGTGCCTCTAATACTTGGTGCTCCTGATATGGCCTTCCCCCGAATAAATAATATGAGATTCTGATTACTTCCCCCATCATTAGCATTACTTATTATAAGAAGAATTGTAGAAAGAGGAGCAGGAACAGGATGGACTGTTTATCCTCCCCTATCTGCTAATGTAGCTCACAGGGGATCTTCTGTAGACTTAGCTATTTTTAG…
RRGCO465-15|Ochropleura	30036	17119	19725	6473	1436	16581	13552	12685	19365	2369	12914	2038	1715	3911	2763	325	2007	9882	4674	2030	1204	AACTTTATATTTTATTTTTGGTGTGTGAGCAGGAATAATTGGAACTTCTTTAAGTTTATTAATTCGTACAGAATTAGGTAATCCTGGATCGCTAATTGGAGATGATCAAATTTATAACACTATTGTTACAGCTCATGCCTTTATTATAATTTTTTTTATAGTTATGCCAATTATAATTGGAGGATTTGGTAATTGATTAATTCCTTTGATATTAGGAGCCCCTGATATAGCTTTCCCACGTATAAATAATATAAGATTTTGATTACTACCCCCATCATTAACTTTATTAATTTCTAGAAGTATTGTTGAAAACGGAGCAGGAACAGGATGAACAGTTTACCCCCCTCTTTCTTCTAATATTGCCCATAGAGGATCTTCTGTTGATTTAGCTATTTTTTC…
RRSSC4965-15|Andrena	0	7125	0	18785	31089	4852	14101	11718	17186	545	580	2039	287	2644	5526	14004	12366	0	302	761	406	TACTTTATACTTTATTTTTGGAGCTTGATCAGGAATAATTGGAACTTCACTAAGAATTCTAATTCGAGCTGAATTAGGACACCCTGGAGCATTAATTGGAGATGACCAAATTTATAACGTAATTGTTACAGCTCATGCTTTTATTATAATTTTTTTTATAGTAATACCAATTATAATTGGAGGATTTGGTAATTGATTAGTTCCTCTAATACTAGGAGCCCCAGATATAGCTTTCCCTCGAATAAATAATATAAGTTTCTGACTTTTACCTCCTGCATTAACTTTATTGTTAGTAAGTAGTATAGTAGAAAACGGAGCTGGAACAGGATGAACTGTTTATCCTCCTTTATCTTCTAATATCGCACATGGAGGAGCTTCAGTAGATTTAGCTATTTTTTC…
RRSSC7805-15|Calligrapha	9194	6789	3239	34875	8592	2607	6899	5189	4500	3856	2409	1374	6280	4256	3358	729	2831	9992	7414	3855	3113	GATATTATATTTTATTTTTGGTATATGATCCGGAATAATTGGATCTTCCATAAGAATAATTATTCGTATAGAATTAGGGAATCCAGGTTACTTAATTAATAATGATCAAATTTATAATTCCATTGTTACAGCTCACGCTTTTATTATAATTTTTTTTATAGTTATACCAATTATAATTGGAGGATTTGGAAATTGATTAGTGCCTTTAATATTAGGGGCCCCAGATATAGCATTCCCACGAATAAATAATATAAGATTTTGACTTTTACCCCCATCATTATTAATATTAATTTTTAGAAGAATTACTAACCAAGGAGTAGGAACTGGATGAACAGTATATCCCCCTTTATCCCTAAACCTTAATCATGAAGGTCTTTCAGTTGATTTAGCTATTTTTTC…
RRMFI4192-15|Megachile	0	10267	100744	20110	917	5490	2153	2171	2667	8156	641	358	1560	4113	2023	411	1237	970	455	1145	1686	AACATTATATTTTTTATTTGGTACATGAGCCGGAATAGTAGGAACATCATTAAGAATTTTAATTCGTGCAGAATTGGGACATCCTGGAGCCTTAATTGGAGACGATCAAATTTATAATGTTATTGTAACTGCTCATGCTTTCGTAATAATTTTTTTTATAGTAATACCAATTATAATTGGAGGATTTGGAAATTGATTAGTTCCATTAATATTAGGAGCACCTGATATAGCATTTCCTCGAATAAATAATATAAGATTTTGACTACTTCCTCCTTCTTTAACTTTATTATTAGTAAGAAGTATAGTAGAAAATGGAGCTGGAACTGGATGAACAGTTTATCCACCATTATCAGCAACTATTGCTCATGGAGGAGCCTCAGTTGATTTAGCAATTTTTTC…
RRGCO513-15|Macrochilo	9178	18496	4717	7885	1254	10540	9761	9264	13055	866	10706	4542	3690	3980	3654	708	1784	7265	5048	2437	2506	AACATTATATTTTATTTTCGGAGCATGAGCAGGAATAGTAGGAACTTCATTAAGTATCCTTATTCGAGCTGAATTAGGTCATCCAGGAGCATTAATTGGAGATGATCAAATTTATAACGTAATTGTTACAGCCCATGCTTTTATTATAATTTTTTTTATAGTAATACCTATTATAATTGGAGGATTTGGTAATTGATTAGTTCCATTAATATTAGGAGCTCCTGATATAGCTTTCCCCCGAATAAACAATATAAGTTTTTGACTTTTACCTCCTGCATTAACTTTATTGTTAGTAAGTAGTATAGTAGAAAATGGAGCTGGAACAGGATGAACTGTTTACCCTCCCTTGTCTTCTAATATTGCTCATGGAGGAGCTTCTGTTGATTTAGCAATTTTTTC…
RRMFD018-15|Chalcosyrphus	24721	5439	52994	3867	1791	1737	4803	4178	2752	2117	5054	4470	1802	3334	2432	513	2077	10873	4226	2352	1796	AACTTTATATTTTATTTTCGGAGCTTGAGCTGGTATAGTAGGTACCTCTCTTAGTATTTTAATTCGAGCCGAGTTAGGTCATCCTGGAGCTCTAATTGGAGATGATCAAATTTATAATGTAATTGTAACAGCACATGCTTTTGTAATAATTTTTTTTATAGTTATACCTATTATAATTGGAGGATTTGGTAATTGATTAGTTCCACTAATACTAGGTGCCCCAGATATAGCTTTTCCTCGAATAAACAATATAAGATTTTGATTATTACCTCCTTCATTAACCTTATTATTAGTTAGAAGCATAGTAGAAAACGGGGCTGGAACAGGTTGAACAGTATACCCTCCTTTATCTTCAGTTATTGCACATGGTGGTGCCTCTGTAGATTTAGCTATTTTCTC…
RRMFG2300-15|Denticollis	6480	6006	23798	8994	3859	2122	4462	3953	5290	7204	32527	2075	3157	1752	1600	4609	4274	6598	2272	970	674	AACATTATATTTTATTTTTGGTATTTGAGCAGGAATAGTAGGAACTTCTTTGAGTTTATTAATTCGAGCAGAATTAGGTAATCCAGGTTCTTTAATTGGAGATGATCAAATTTATAATACTATTGTAACAGCTCATGCTTTTATTATAATTTTCTTCATAGTTATACCAATTATAATTGGAGGATTTGGAAATTGATTAGTGCCTTTAATATTAGGTGCTCCAGATATAGCTTTCCCTCGTATAAATAATATAAGTTTTTGATTACTTCCACCTTCTATTATACTTTTAATTTCAAGAAGAATTGTAGAAAATGGAGCAGGAACTGGATGAACAGTATACCCCCCACTTTCATCTAATATTGCTCATGGAGGAAGTTCTGTAGACTTAGCAATTTTTTC…
RRMFB1218-15|Epalpus	59008	6121	8035	12678	1390	1746	4183	4440	4661	109	4048	3557	3777	3539	3123	1173	2546	8754	4450	2872	2237	ATTATTATACTTTGTTTTTGGTTTATGATCAGGAATAATTGGATCTTCATTAAGAATAATTATCCGTATAGAACTTGGAACCCCTGGACAATTAATTGGTAATGATCAAATTTACAATACTATTGTTACTGCACATGCTTTTATTATAATTTTTTTTATAGTTATACCTTTTATAATTGGAGGATTTGGAAACTGATTAATTCCAATTATATTATCAGCACCAGATATAGCCTTCCCACGTATAAATAATATAAGATTTTGACTATTACCTCCTTCATTAATATTATTACTTATAAGCAATTCTATTGGTTCAGGTGTAGGAACTGGATGAACTTTATACCCTCCTTTATCTTCTATTATTGGCCATAATACTCCCTCTGTAGATTTAAGTATTTTTTC…
RRGCO578-15|Archips	4161	2311	3650	2489	3390	10441	5807	6298	8335	683	6821	3732	5754	5664	4396	9238	10040	2036	2967	2033	1903	AACATTATATTTTATTTTTGGAATTTGAGCAGGTATAGTAGGAACATCCCTTAGTCTAATTATTCGAACTGAACTAGGTAATCCAGGATTTTTAATTGGAGATGACCAAATTTATAATACTATTGTTACAGCTCATGCTTTTATTATAATTTTTTTTATAGTAATACCTATTATAATCGGAGGATTTGGTAATTGATTAGTCCCTCTTATACTAGGTGCTCCTGATATAGCTTTCCCCCGAATAAATAATATAAGATTTTGACTTTTACCCCCCTCATTAATTTTGTTAATTTCAAGTAGTATTGTTGAAAATGGAGCAGGAACAGGTTGAACTGTTTACCCCCCTCTTTCTTCCAACATTGCTCATGGAGGATCCTCTGTTGACCTTGCTATTTTCTC…
RRMFG2655-15|Cassida	20	6213	11375	2081	25353	1653	4967	6641	2221	562	16673	9157	16	3376	2407	4371	7196	1470	1771	670	3485	TATATTATATATTATTTTTGCTTTATGGTCAGGTATAATTGGAACATCAATGAGATTTTTAATTCGTATAGAATTAAGTAATCCAGGAGAATGAATTATAAATGATCAAATTTATAATTCTTTAGTTACTGCACATGCTTTTTTAATAATTTTTTTTATAGTTATACCTTTTATAATTGGAGGATTTGGAAATTGATTAGTTCCTTTAATATTAGGTTGTCCTGATATAGCTTTTCCTCGTATAAATAATATTAGATTTTGATTATTACCTCCATCTTTGTTTTTATTATTATTAAGAAATTTATTTAATATTACTCCAGGTACAGGATGAACAGTTTATCCTCCTTTATCTTCATCTATATTTCATAGATCTCCTTCTGTAGATTTAGCAATTTTTTC…
RRSSA3967-15|Cardiophorus	50	4106	44	11679	10479	2011	5232	3908	2338	708	5252	144	5	2345	6171	17617	13360	1301	3573	1205	822	AACTTTATACTTTATTTTCGGTGCTTGAGCTAGAATAGTCGGAACATCCCTAAGTTTATTAATTCGTTCAGAATTAGGAAACCCCGGATCTTTAATCGGAAATGATCAAATTTATAATGTAATTGTTACAGCTCATGCTTTTGTAATAATTTTCTTCATAGTTATACCTATTATAATTGGCGGATTCGGAAATTGATTAGTTCCATTAATATTAGGGGCTCCCGATATAGCATTCCCTCGAATAAATAATATAAGATTTTGATTATTACCTCCTTCTCTAACTTTATTAATTATAAGAAGAGTTGTCGAAAAAGGTGCCGGAACTGGATGAACAGTCTACCCTCCGCTTTCAGCTAATATTGCTCATAGAGGATCTTCTGTAGATTTAGCTATTTTTAG…
RRGCO519-15|Cryptocala	14154	8229	4792	7206	679	1257	5583	4621	6337	1182	31108	4082	6109	3883	2599	835	933	1238	3139	1796	2060	AACATTATATTTTTTATTTGGAATTTGATCAGGAATATTAGGAACTTCACTAAGTTTATTAATTCGTGCAGAATTAGGAAACCCAGGATCTTTAATTGGAGATGATCAAATTTATAATACAATTGTGACCGCTCATGCATTTATTATAATTTTCTTTATAGTTATACCTATTGTTATTGGAGGATTCGGAAATTGACTTATCCCATTGATATTAGGAGCTCCTGATATAGCCTTTCCTCGAATAAATAATATAAGATTTTGACTACTTCCCCCCTCATTAACCTTATTAATTTCCAGAAGAATTGTTGAAAATGGAGCAGGTACTGGATGAACTGTTTATCCTCCTTTATCTTCAAATATCGCTCATAGAGGAAGATCTGTCGATTTAGCTATTTTTTC…
RRGCO250-15|Phragmatobia	13243	8927	18	16383	2658	1981	7090	7184	10070	1411	433	3837	5697	5035	4824	4381	5450	1207	2364	1858	1688	AACATTATATTTTATTTTTGGTATTTGAGCTGGTATAATTGGTACTTCTCTAAGATTATTAATTCGTGCTGAATTAGGAAATCCTGGATCTTTAATTGGGGATGACCAAATTTATAATACTATTGTAACTGCTCACGCATTTATTATAATTTTTTTCATGGTTATACCTATTATAATTGGAGGATTTGGAAATTGATTAGTTCCCTTAATATTAGGAGCTCCTGATATAGCATTCCCCCGAATAAATAATATAAGATTTTGATTATTACCCCCCTCTATTATACTTTTAATCTCAAGTAGAGTAGTAGAAAATGGAGCAGGTACCGGATGAACAGTTTATCCCCCACTTTCATCAAACATTGCTCATAGCGGAAGATCTGTAGATCTAGCTATTTTTTC…
RRMFC2020-15|Myospila	7935	5141	5713	1267	14680	10744	4389	4272	5860	428	1809	4356	1609	4725	4088	3294	7981	8696	2490	1180	733	AACTTTATATTTTATTTTCGGAGCATGATCTGGAATAATTGGTACTTCATTAAGTATTTTAATTCGAGCTGAATTAGGACATCCTGGTTCATTAATTGGTGATGATCAAATTTATAATGTAATTGTTACTGCTCATGCATTTATTATAATTTTTTTTATAGTAATACCAATTATAATTGGAGGATTTGGAAATTGATTAGTTCCTTTAATATTAGGAGCCCCAGATATAGCTTTTCCACGAATAAATAATATAAGTTTTTGATTACTTCCCCCTTCATTAACACTTTTATTAGCAAGTAGTATAGTAGAAAACGGAACTGGTACAGGATGAACAGTTTACCCCCCTTTATCCTCAGTAATTGCTCATGGAGGAGCTTCTGTTGATTTAGCAATTTTTTC…
RRSSC3214-15|Zelus	2	3861	11	31991	769	1888	5599	5990	6436	1	4333	6291	7517	4340	3656	5868	5537	513	2462	1271	1137	AACCTTATATTTTATTTTTGGAAGTTGATCAGGATTATTAGGAACATCTTTAAGAGTTCTAATTCGAACAGAATTAGGAACTACTAAATCTTTAATTAATAATGATCAAATTTATAATGTTTTAGTCACTGCTCATGCTTTTATTATAATTTTTTTTATAGTAATACCAATTATAATTGGAGGTTTTGGCAATTGACTTGTTCCTTTAATGTTAGGAGCTCCAGATATGGCATTCCCACGAATAAATAATATAAGATTTTGACTTTTGCCTCCTTCTTTAAATTTTTTATTACTTAGAAGTTTAGTAGAAAATGGAACTGGAACTGGTTGAACTGTCTATCCTCCTTTAGCAAGAAACATCGGTCATATGGGGAGTTCTGTTGATTTATCTATTTTTTC…
RRGCO427-15|Elophila	11117	13603	6808	6858	6959	632	4246	3648	1354	620	344	6281	9912	3555	3474	7491	3512	9	4830	1386	944	AACATTATACTTTTTATTTGGAATGTGAGCTGGAATAGTGGGATCTGCAATAAGATTAATTATCCGTATTGAATTGGGTCAGCCCGGAAGATTTATTGGAGATGACCAAATTTATAACGTTGTAGTTACAGCACATGCCTTTGTAATAATTTTCTTTATAGTTATACCTATTATAATTGGAGGATTCGGAAATTGATTAGTACCTTTAATAATTGGAGCCCCTGATATGGCATTCCCTCGAATAAATAATATAAGATTTTGATTATTACCTCCTTCCTTAACATTATTAATAGTAAGTAGATTAGCAGAGGCTGGAGCTGGGACTGGATGAACTGTTTATCCTCCCTTATCTAGTAACCTTTCCCATAGAGGAGCTTCTGTAGATCTAGCAATCTTTTC…
RRGCO276-15|Desmia	5671	12394	1035	3939	1116	9876	7666	7977	10722	653	3317	4178	7756	5483	3455	890	1985	2218	3519	1669	1323	AACATTATATTTTATTTTTGGAATTTGAGCAGGAATAGTCGGAACATCTTTAAGATTATTAATTCGAGCTGAATTAGGAAATCCCGGATCTTTAATTGGGGATGATCAAATTTATAATACTATTGTTACAGCACATGCTTTTATTATAATTTTTTTTATAGTTATACCAATTATAATTGGAGGTTTTGGAAATTGATTAGTACCATTAATATTAGGAGCTCCAGATATAGCCTTCCCTCGAATAAATAACATAAGTTTTTGATTATTACCTCCTTCATTAACCCTTTTAATTTCAAGAAGAATTGTAGAAAATGGAGCAGGAACAGGATGAACAGTTTACCCCCCACTTTCATCTAATATCGCTCATGGTGGTAGATCAGTAGATCTAGCTATTTTTTC…
RRGCO055-15|Phalaenophana	8842	7753	13560	6346	3533	5560	4042	3345	5850	13618	8555	1278	4471	2295	1940	3771	3494	1143	1979	959	596	AACATTATATTTTATTTTTGGGATCTGAGCAGGAATAGTTGGAACATCCTTAAGATTATTAATTCGTGCTGAATTAGGAAATCCTGGTTCTTTAATTGGAGATGATCAAATCTATAATACTATCGTAACAGCTCATGCTTTTATTATAATTTTTTTTATAGTTATACCAATTATAATTGGAGGATTCGGTAATTGATTAGTGCCTTTAATATTAGGAGCTCCTGATATAGCTTTTCCACGAATAAATAATATAAGTTTTTGACTTTTACCTCCATCATTAACTTTATTAATTTCAAGAAGAATTGTAGAAAATGGAGCAGGAACAGGATGAACAGTTTACCCCCCACTTTCATCTAATATTGCTCATGGTGGAAGATCAGTAGATTTAGCTATTTTTTC…
RRSSA228-15|Chrysops	96	2962	0	4702	2188	6676	4297	3428	3461	18450	6995	6395	5870	3427	2360	751	914	497	4636	1526	3120	AACATTATATTTTATTTTTGGAATTTGAGCAGGAATAGTTGGAACTTCTTTAAGATTATTAATTCGTGCTGAATTAGGAAATCCAGGATCTTTAATTGGAGATGACCAAATTTATAATACTATTGTAACAGCACATGCTTTTATTATAATTTTTTTTATAGTAATACCTATTATAATTGGAGGATTTGGTAATTGATTAGTTCCCCTTATACTAGGAGCCCCAGATATAGCCTTTCCTCGAATAAATAATATAAGTTTTTGACTTCTCCCCCCCTCATTAACTTTATTAATTTCAAGAAGAATTGTAGAAAATGGAGCAGGAACAGGATGAACAGTTTACCCCCCACTTTCATCTAATATTGCCCATAGAGGAAGATCAGTAGATTTAGCTATTTTTTC…
RRMFE2527-15|Parasetigena	2716	6798	5737	1980	3647	9328	5408	4959	6845	346	3183	3543	6497	3799	5379	4110	4751	7396	2770	1070	596	AACACTATATTTTATTTTTGGTGCTTGATCTGGATTACTAGGAACATCTCTAAGAGTAATAATTCGAACTGAATTAGGTTCAGTAGGGTCATTAATTAAAAATGATCAAATTTATAATGTAATGGTTACTGCTCATGCTTTTATTATAATTTTTTTTATAGTGATACCTATAATAATTGGAGGATTTGGAAATTGACTAGTTCCTTTAATACTAAGATGTCCTGATATAGCTTTTCCTCGAATAAATAATATAAGATTTTGATTACTTCCACCATCTTTAAATTTTCTTTTATTAAGAAGATTAGTAGAAAGAGGAACAGGAACTGGTTGAACTGTTTATCCTCCACTTGCAAGAACAGTAGGACACATAGGAAGTTCTGTGGATTTATCAATTTTTTC…
RRSSC7193-15|Nephrotoma	2857	7154	4869	522	1525	7080	7142	6609	9598	3391	6902	4753	4734	3141	3029	4079	4573	6102	3104	838	527	GACTTTGTACTTTATTTTTGGTGCATGAGCAGGAATAGTAGGAACTTCTTTAAGTATATTGATTCGAGCAGAATTAGGAAACCCGGGATCATTAATTGGTGATGATCAAATTTATAATGTAATTGTTACTGCCCATGCATTTATTATAATTTTCTTTATAGTAATACCTATTATAATTGGAGGATTTGGAAATTGATTAGTTCCTTTAATATTGGGAGCTCCTGATATAGCATTTCCTCGAATAAATAATATAAGTTTCTGATTACTTCCTCCTTCTTTAACTTTGCTCTTAATGAGAAGAATAGTTGAAAGAGGAGCAGGGACCGGATGAACAGTTTACCCTCCTTTATCTTCTGGAATTGCTCACGCAGGAGCTTCGGTTGATTTAGCTATTTTTAG…
RRGCO238-15|Ecliptopera	11909	2156	9066	10828	1732	4960	1431	1750	2631	30919	1298	1096	1277	3424	2761	2620	3558	826	958	920	1023	AACTTTATATTTTATTTTTGGAGCCTGAGCAGGAATAGTGGGAACATCATTAAGAATACTAATTCGAGCTGAACTAGGTCATCCAGGTGCTTTAATTGGTGACGACCAAATCTATAACGTAATTGTTACAGCCCATGCTTTCGTAATAATTTTCTTTATAGTAATACCTATTATAATTGGAGGATTCGGAAATTGACTTGTTCCTTTAATACTAGGAGCCCCTGATATAGCTTTTCCTCGTATAAATAATATAAGATTTTGACTTCTCCCACCATCTTTAACTCTTCTTCTAATAAGCAGAATAGTAGAAAATGGGGCTGGGACAGGTTGAACAGTTTACCCCCCTCTCTCTTCTAATATCGCTCATGGTGGTGCATCAGTTGATTTAGCTATTTTCTC…
RRMFE3088-15|Myolepta	9079	6762	6695	3045	959	4773	5903	4634	5445	16053	6798	677	19	3360	2976	712	1283	5139	1872	1435	1708	AACATTATATTTTATTTTTGGAATTTGAGCAGGAATAGTTGGTACTTCTTTAAGATTATTAATTCGTGCTGAATTAGGAAATCCTGGATCTTTAATTGGAGATGACCAAATTTATAATACTATCGTTACCGCTCATGCTTTTATTATAATTTTTTTTATAGTAATACCTATTATAATTGGAGGATTTGGAAATTGATTAGTTCCATTAATACTAGGAGCTCCTGATATAGCTTTTCCACGAATAAATAATATAAGATTTTGAATACTCCCCCCATCTCTTATACTACTTATTTCAAGAAGAATTGTAGAAACTGGAGCAGGTACTGGATGAACTGTATATCCCCCCCTTTCATCTAATATTGCTCATAGTGGAACCTCAGTTGATTTAGCTATTTTCTC…
RRMFG2356-15|Melanoplus	26991	749	459	4573	32901	630	1468	1017	2668	0	309	6522	3734	2817	2978	510	5049	4211	2230	213	560	AACCTTATATTTTTTATTTGGAATATGGGCTGGAATAATCGGAACTTCTCTTAGAATTTTAATTCGACTAGAATTAGGAACTACAGGAAGTTTAATTGGAAATGACCAAATTTATAACGTAATTGTTACTGCCCATGCTTTTATTATAATTTTTTTTATAGTTATACCTATTATAATTGGAGGTTTTGGAAATTGATTGGTACCTTTAATAATTGGGGCCCCTGATATAGCGTTCCCCCGTTTAAATAATATAAGATTTTGGCTTTTACCCCCTGCTTTAACTCTTCTTTTATTTAGAAGAATAGTAGAAATAGGAGCTGGAACTGGGTGAACTGTTTATCCTCCTTTATCTTCAAATTTAGCCCATAATGGACCTTCTGTTGATTTAGTTATTTTTAG…
RRGCO536-15|Depressaria	5428	5585	18274	2599	3853	6847	5021	4742	6958	379	5060	2475	3697	1883	1984	2095	3988	4857	1540	896	888	TACATTATACTTTTTATTTGGTATATGATCTGGAATAATTGGTTCCTCCATAAGATGAATTATCCGAGTAGAATTAGGACAACCAGGATCCTTTATTGGAGATGACCAAATCTATAATGTTATCGTAACTGCCCATGCATTCATCATAATTTTTTTCATGGTTATACCAATTATAATTGGAGGTTTTGGCAATTGATTAGTACCTTTAATAATTGGGGCACCAGATATAGCCTTCCCTCGAATAAATAATATATCATTTTGACTTTTACCACCTTCACTAACATTACTTTTATCAAGAAGAATAGTAGAAATAGGAGCAGGAACTGGATGAACAGTTTATCCTCCTTTATCAAACAGATTATTCCACAGAGGAGCATCAGTAGATATAGCAATCTTCTC…
RRGCO222-15|Haploa	10191	4181	8295	5135	4527	6654	3630	3947	5587	598	4417	1288	2926	2526	2547	2942	4927	4069	1407	993	844	AACTTTATATTTTATTTTTGGTATTTGATCTGGAATAGTAGGTACTTCATTAAGTTTATTAATTCGTGCTGAATTAGGAAATCCCGGATCTTTAATTGGAGATGATCAAATTTATAATACTATCGTAACAGCTCATGCCTTTATTATAATTTTTTTTATGGTTATACCTATTATAATTGGCGGATTTGGAAATTGATTAGTGCCTTTAATATTAGGTGCTCCTGATATAGCTTTCCCTCGAATAAATAATATAAGATTCTGATTACTACCTCCTTCATTAACTTTACTAATTTCCAGAAGAATTGTAGAAAATGGAGCAGGAACTGGATGAACAGTGTACCCCCCACTTTCATCTAATATTGCTCATGGAGGAAGATCTGTTGATTTAGCTATTTTTTC…
RRGCO537-15|Lascoria	3799	10631	16031	2667	1056	5377	5010	5093	6810	447	6225	2777	4839	2267	1258	741	1236	1217	2193	872	1153	AACTTTATATTTAATATTTGGAGCATGGGCCGGAATAGTAGGAACTGCTCTAAGAATATTAATTCGAGTTGAATTAGGACAACCTGGATCATTAATTGGAGATGATCAAATTTATAATGTAGTAGTTACTGCACATGCATTTGTTATAATTTTTTTTATAGTTATACCTATTATAATCGGAGGATTTGGAAATTGACTGGTACCATTAATATTAGGAGCGCCAGATATGGCTTTTCCACGATTAAATAACATGAGATTTTGACTTTTACCCCCATCACTAACCTTATTACTAGCAAGAAGATTAGTAGAAAGAGGAGCCGGGACTGGTTGAACTGTATATCCTCCATTAGCAGGGGTAATTGCTCATGCTGGAGCATCCGTTGATTTAACTATTTTTTC…
RRSSA226-15|Hybomitra	23429	3419	1311	6871	272	2073	1831	1568	1026	24552	3984	2991	2708	1518	917	334	474	744	1495	687	1043	AACTTTATATTTTGTATTTGGGGCTTGATCAGGAATAGTGGGGACTTCATTGAGCTTGTTGATTCGGGCAGAATTGGGCCAACCTGGAGCTTTAATCGGAGATGATCAAATTTATAATGTAATTGTTACGGCCCATGCTTTTGTAATGATTTTTTTTATGGTAATGCCTATTATGATTGGAGGTTTTGGGAATTGACTGGTACCTTTGATGTTGAGAGCCCCAGATATGGCCTTTCCCCGAATAAACAACATGAGTTTTTGGTTACTACCCCCTTCGCTTATGCTTTTGCTTTCTGGGAGTATGGTAGATAGAGGAGCTGGTACAGGTTGGACAGTTTACCCCCCTTTGTCGGGGGCCATCGCCCACGCAGGGGCTTCGGTAGATTTGAGTATTTTTTC…
RRGCO376-15|Dioryctria	15229	3186	6025	9358	4435	2911	1045	1359	1872	15818	8158	449	1245	1724	1149	1136	2969	470	690	352	315	AACTTTATATTTTATTTTTGGTGTTTGGTCAGGACTATTAGGAACATCTCTAAGAGTACTAATTCGAACAGAACTGGGAACTCTTGGATCTTTAATTAAAAATGATCAAATTTATAATGTTTTAGTTACTGCACATGCTTTTATTATGATTTTTTTTATAGTGATGCCAATTATAATTGGCGGGTTTGGAAACTGATTAGTTCCTTTAATATTGGGAGCTCCAGATATAGCCTTTCCTCGAATAAATAACATAAGATTTTGGTTACTCCCTCCTTCATTAAATTTTTTACTTTTAAGAAGAATAGTGGAAAGAGGGACTGGAACAGGTTGAACTGTTTACCCCCCTTTAGCTAGAAATATCGCTCATATGGGCAGATCAGTTGATTTATCAATTTTTTC…
RRGCO570-15|Urola	3330	2440	6999	2498	1326	1012	4272	4081	3919	257	9638	3714	5695	2120	1835	5023	3193	26	2236	798	675	AACATTATATTTCTTATTCGGAATATGAGCCGGAATAATTGGGACCTCTTTAAGAATTTTAATTCGTCTTGAATTAGGAACTACTAATAGATTAATTGGAAATGACCAAATTTATAATGTAATTGTAACAGCTCATGCCTTCATTATAATTTTTTTTATAGTTATACCAATTATAATTGGAGGATTTGGAAATTGACTTGTTCCTTTAATAATTGGAGCACCTGACATAGCTTTCCCTCGATTAAATAATATAAGATTTTGACTACTCCCACCTGCCTTAACCTTACTTATTATTAGAAGATTAGTGGAAATAGGTGCAGGAACTGGATGAACTGTCTATCCTCCTTTATCCTCTAACTTAGCTCATAATGGGCCTTCAGTAGATTTAGTAATTTTTAG…
RRMFG3282-15|Ctenophora	7980	6270	4	4541	839	6137	5376	5308	6997	10003	1181	2330	1494	2555	1301	524	1171	2777	2308	885	585	AACATTATATTTTATTTTTGGAGCATGAGCAGGAATAGTAGGAACTTCATTAAGCATATTAATTCGAGCTGAATTGGGAACTCCTGGTGCATTAATTGGTGATGATCAAATTTATAATGTTATCGTTACTGCACATGCTTTTATCATAATTTTTTTTATAGTTATACCTATTATAATTGGAGGATTTGGAAATTGATTAGTACCTTTAATACTAGGTGCTCCTGATATAGCCTTTCCTCGAATAAATAATATAAGTTTTTGACTACTTCCCCCTTCTTTAACTCTTCTTTTAATAAGAAGAATAGTAGAAAGTGGAGCTGGAACTGGATGAACAGTTTATCCACCTTTATCATCTGGAATTGCCCATAGAGGAGCTTCAGTTGATTTAGCAATTTTTAG…
RRSSA2338-15|Platynus	8003	4597	48	2032	1027	5263	3907	3801	4014	1378	9286	4823	990	2883	2162	375	1338	5833	2349	928	563	AACCTTATATTTTATTTTTGGAATTTGATCAGGAATATTAGGAACATCATTAAGATTATTAATTCGAATGGAATTAAGAACCCCTGGAGCATTAATTGGAAATGATCAAATTTATAATACAATTGTAACAGCACATGCTTTTATTATAATTTTTTTTATAGTTATACCTATTATAATAGGAGGATTTGGTAATTGAATATTACCCTTAATACTAGGAACCCCTGATATAGCTTTCCCTCGAATAAATAATTTAAGATTTTGATTATTACCTCCATCATTATTACTGTTAATTTCAAGAAGATTAGTAGAAAATGGAGCAGGAACAGGATGAACTGTTTACCCACCTTTATCCTCAAATATTTCTCACAGAGGAAGATCTGTAGACTTAGCAATTTTTTC…
RRSSC7852-15|Euphylidorea	7892	1197	3870	7120	6195	1717	2269	2120	2410	14058	556	1851	2107	1548	1111	2040	1975	569	358	1115	1418	AACACTATATTTCTTATTCGGAATATGAGCAGGTATAGTAGGTTCCGCCATAAGAATCATCATTCGTATTGAACTAGGACAACCAGGAAGATTTATTGGGGATGACCAAATCTATAATGTAGTAGTCACCGCTCACGCATTCGTAATAATTTTCTTTATAGTAATACCAATTATAATTGGGGGTTTTGGTAACTGATTAGTACCATTAATAATTGGAGCCCCTGATATAGCATTTCCTCGTATAAATAATATAAGATTCTGACTATTACCCCCTTCAATTACATTATTAATAATAAGTAGATTGGCTGAATCGGGAGCAGGGACTGGTTGAACCGTCTACCCCCCATTATCTAGTAATCTATCACACAGAGGAGCATCAGTAGACTTAGCTATTTTTTC…
RRGCO075-15|Crioceris	4650	10458	0	9610	2953	804	1567	1067	300	986	2975	1895	9888	3502	2308	1082	815	107	6022	845	366	AACTTTATATTTTATTTTCGGTAGATGATCAGGATTATTAGGTACATCCTTAAGAATCCTAATTCGAACTGAATTAGGTACCACTAAATCTTTAATTAATAATGATCAAATCTATAATGTATTAGTTACAGCTCATGCTTTTATTATAATTTTTTTTATAGTAATACCAATTATAATTGGTGGATTTGGTAATTGACTTGTTCCATTAATGCTAGGAGCCCCAGATATAGCATTTCCACGAATAAATAATATAAGATTTTGATTATTGCCTCCTTCTTTAAATTTCTTACTTCTTAGAAGATTAGTAGAAAATGGTACGGGAACTGGTTGAACTGTTTACCCACCATTAGCAAGAAATGTCGGACATATAGGTAGTTCCGTTGATCTATCTATTTTTTC…
RRGCO252-15|Zanclognatha	4346	7003	6563	1752	906	5062	4694	4320	6627	344	5220	2042	1936	1723	1723	690	969	5052	1782	918	911	AATATTATATATTATTTTTGCTTTATGATCAGGAATAATTGGAACTTCAATAAGATTCATTATTCGTATAGAATTAAGAAATCCTGGAGAATGAATTATAAATGATCAAATTTATAATTCTTTAGTTACAGCTCATGCCTTTTTAATAATTTTTTTTATAGTTATACCTTTTATAATTGGGGGGTTTGGTAATTGATTAGTTCCTTTAATATTAGGATGTCCTGATATAGCTTTCCCTCGAATAAATAATATTAGATTTTGATTATTGCCCCCATCATTAATTTTATTATTATTAAGAAATTTATTCAATATTACCCCAGGAACAGGATGAACAGTTTATCCTCCATTATCTTCATCAATATTTCATAGATCTCCATCAGTTGATTTAGCAATTTTTTC…
RRSSA3896-15|Pidonia	13756	1007	3899	5850	5848	196	4089	3558	4003	63	4344	2216	2790	2102	2281	1733	2339	4101	991	778	839	AACACTTTATTTTATATTTGGAATATGATCAGGAATAATTGGAATAATATTGAGAATAATTATTCGAATTGAATTAGGTCAACCAGGAGCATTTATTAACAATGATCAAATCTATAATACAATTATTACATCACATGCATTTATTATAATTTTCTTTATAGTTATACCAATTATAATTGGAGGATTTGGTAACTGACTATTACCTATTATAATTGGAGCTCCAGATATAGCATTTCCACGAATAAATAATATAAGATTCTGATTATTACCTCCATCAATTACAATATTATTAATTAGATCTATAGTTGAATCAGGAGTAGGAACTGGGTGGACAGTATATCCTCCTTTATCAAGAAATTTAGGTCACTCTGGGCCTAGAATTGAATTTGCAATTTTTTC…
RRMFG2329-15|Orthodes	8726	4862	2938	2015	1183	9531	4889	4952	7393	545	5103	2145	505	3380	2406	529	872	1233	1729	809	826	TACTCTCTATCTAATATTTGGTGCATGAGCAGGTATAGTAGGTACTGCATTAAGTATATTAATTCGAATTGAATTAGGTCAACCAGGATCTTTAATTGGAGATGATCAAATTTACAATGTAATTGTAACTGCACACGCATTCGTTATAATTTTCTTTATAGTAATACCAATCATAATCGGGGGATTTGGAAACTGACTGGTTCCCTTAATATTAGGTGCTCCTGATATAGCTTTTCCACGACTAAATAATATAAGATTTTGATTATTACCTCCGTCATTAACCCTACTTCTAGCAAGAAGTCTAGTAGAAAGAGGGGCTGGTACAGGATGAACTGTATATCCACCCTTAGCTGGAGCTATTGCCCATGCAGGAGGGTCTGTAGATTTAACAATTTTCTC…
RRGCO561-15|Phalaenostola	6706	7024	9508	3325	794	3305	2798	3037	4370	778	8103	1598	1232	1455	1399	421	822	3447	1444	1070	1119	AACTCTATATTTTATTTTTGGAATTTGAGCAGGTATAATTGGTACATCATTAAGTTTATTAATCCGAGCTGAATTAGGAAACCCAGGATCCTTAATTGGTGATGATCAAATTTATAATACTATTGTAACAGCTCATGCTTTTATTATAATTTTTTTTATAGTTATACCAATCATAATTGGAGGATTTGGAAATTGATTAATTCCTTTAATGCTAGGAGCTCCTGATATAGCTTTCCCCCGAATAAATAATATAAGATTTTGATTATTACCCCCATCAATTACATTGTTAATTTCAAGAAGAATTGTAGAAAATGGAGCAGGAACTGGATGAACAGTTTACCCCCCTTTATCCTCTAATATTGCTCATGGAGGAAGCTCTGTAGATTTAGCTATTTTTTC…
RRMFA243-15|Orthosia	5442	3380	1230	2107	2203	1031	1895	1821	761	562	5586	2569	1221	7749	3513	4858	3869	1246	1732	505	750	AACTTTATATTTTATTTTTGGAATTTGAGCAGGAATAGTAGGAACTTCCTTAAGACTATTAATTCGAGCAGAATTAGGAAACCCCGGATCCTTAATTGGAGATGATCAAATTTATAATACTATTGTTACAGCTCATGCCTTTATTATAATTTTTTTTATAGTTATGCCTATTATAATTGGAGGATTTGGAAATTGATTAGTTCCTTTAATATTAGGAGCCCCAGATATAGCTTTCCCCCGAATAAACAACATAAGATTTTGATTATTACCCCCTTCTTTAACTCTTCTTATTTCCAGAAGAATTGTAGAAAATGGAGCAGGAACTGGATGAACAGTTTACCCCCCTCTTTCATCTAATATTGCCCATGGAGGAAGATCTGTTGATTTAGCTATTTTCTC…
RRSSC7819-15|Ormosia	8198	1977	6570	2649	2681	1054	2272	2016	1174	77	48	4340	4214	2950	2729	4771	3406	786	1485	943	1004	AACATTATACTTTATTTTTGGAATTTGAGCCGGAATAGTAGGGACTTCATTAAGAATGCTAATCCGAGCAGAACTAGGAAATCCTGGATCATTAATCGGAGATGACCAAATTTACAACACAATTGTAACAGCGCATGCTTTTATTATAATTTTTTTTATAGTAATGCCAATTATAATTGGAGGATTTGGGAACTGATTAGTCCCCCTTATATTGGGAGCCCCTGATATGGCATTCCCACGAATAAATAATATAAGATTTTGATTATTACCCCCATCAATTACATTATTAATTAGAAGAAGAGTAGTTGAAAATGGAGCAGGAACTGGATGAACAGTTTACCCCCCACTATCATCCAATATTGCCCACAGAGGAAGCTCTGTGGATCTAGCAATTTTTTC…
RRMFG2299-15|Melandrya	11171	5571	497	1527	603	11986	6273	6829	7780	113	1258	2339	3561	2533	1429	341	747	599	981	226	496	AACTTTATACTTTTTATTTGGAGCATGAGCCGGTATAGTAGGAACCTCTCTAAGCATATTAATTCGTACAGAATTAGGTCACCCAGGATCACTAATTGGAGATGACCAAATTTATAACGTTATTGTTACAGCACATGCTTTTGTAATAATTTTTTTTATAGTAATGCCTATTATAATTGGAGGATTTGGAAATTGATTAGTGCCATTAATATTAGGAGCCCCAGATATAGCTTTCCCTCGTATAAATAATATAAGATTTTGAATATTACCCCCTTCTTTAACTTTATTGTTAGCTAGTAGAATAGTTGAAAACGGAGCAGGAACTGGATGAACAGTTTACCCTCCTTTATCTTCAGGTATTGCCCATGGAGGAGCATCTGTTGATCTAGCAATTTTTTC…
RRMFD055-15|Tachinomyia	3054	6410	2956	799	8287	95	58	44	16	439	7964	3249	198	2735	2225	2546	4896	6250	2175	676	30	AACATTATATTTCATTTTTGGATTCTGATCAGGAATAGTGGGAACATCTCTAAGAATTTTAATTCGAGCAGAATTAGGAAACCCCGGAACATTAATCGGAAATGACCAAATCTATAATTCAATTGTTACAGCCCATGCCTTCATCATAATTTTTTTTATAGTTATACCAATTATAATTGGAGGTTTCGGGAATTGACTAGTACCCCTAATACTAGGAGCACCAGATATAGCATTCCCACGATTAAACAACATAAGATTTTGGCTTCTACCACCTTCAATTACATTTTTAATTATAAGGAGAGTTATTGAAAGAGGAGCAGGAACAGGATGAACAGTATATCCACCATTATCCTCTAATATTGCTCACAGAGGGGCCTCTGTGGACATAGCAATTTTTAG…
RRMPA001-15|Syrphus	10369	6327	3768	1612	679	2008	3157	2604	3812	4559	8810	2308	652	1201	957	378	786	4034	1979	1060	730	AACTTTATATTTTTTATTTGGATTTTGATCAGGAATAATTGGAATATCATTTAGAATATTAATTCGAATAGAACTAGGAAGTCCTGGAGCAGTAATTGGAAATGATCAAATTTATAATGTAATCGTTACTTCTCATGCTTTTTTAATAATTTTTTTTATAGTAATACCAGTAATAATTGGTGGATTTGGAAATTGATTAATTCCTTTAATATTAGGGGCCCCTGATATAGCATTTCCACGATTAAATAATATAAGATTTTGATTTTTACCCCCATCAATTATTTTATTATTATCAAGAAGAATGGTAAATTCAGGTTCAGGAACTGGTTGAACTGTTTATCCACCTCTCTCAAGAAGAATTTCACACGCTGGACCATCTGTAGATTTAACTATTTTTTC…
RRSSA3894-15|Athous	0	1458	915	1064	6124	5791	4138	2923	1826	158	532	9129	21	7327	4275	529	1799	214	575	122	1902	AACTTTATACTTCATTTTCGGGGCATGATCCGGAATAATTGGTACTTCATTAAGTATTTTAATTCGAACTGAATTAGGACATCCAGGTTCATTAATTGGTGATGATCAAATTTATAATGTAATTGTTACAGCGCATGCATTTATTATAATTTTTTTTATAGTAATACCAATTATAATTGGAGGATTCGGAAATTGATTAGTTCCTTTAATATTAGGAGCCCCAGATATAGCATTCCCACGAATAAACAATATAAGTTTTTGATTACTTCCACCTTCATTAACACTTTTATTAGCAAGTAGTATAGTAGAAAACGGAGCTGGGACAGGATGAACAGTTTACCCACCTTTATCTTCAGTGATTGCTCATGGAGGAGCTTCTGTTGATTTAGCAATTTTTTC…
RRMPG974-15|Compsobata	279	956	1540	4452	1082	1336	1605	1504	1819	14691	13593	2166	1857	1120	1168	1437	779	410	358	629	489	AATAATATATTTCCTATTTGCATTATGATCAGGAATAATTGGAACTTCATTAAGAATAATTATTCGTATAGAATTAGGATCAGTTTCCCAATTAATTGGAGATGATCAAATTTATAATACTATTATTACTAGTCATGCCTTTATTATAATTTTTTTTATAGTAATACCATTTATAATTGGAGGATTTGGAAACTGATTAGTTCCATTAATACTAGGAGCACCAGATATAGCATTTCCTCGAATAAATAATATAAGATTTTGATTATTAATTCCATCATTAAGACTATTAATTTTTAGAAGAATTACAGATACAGGAACAGGAACAGGATGAACAGTTTATCCACCCCTTTCTTCATCACTTTACACAAGAGGTTATTCAGTTGATCTCTCAATTTTTTC…
RRMFD560-15|Cyrtophorus	13	9090	1	1209	2407	4775	4504	4059	4949	75	7790	3001	3131	2177	2216	1171	1712	537	1105	70	728	AACATTATATTTTATTTTTGGATTTTGATCTGGAATATTAGGATTATCATTTAGAATATTAATTCGAACAGAATTAGGAATACCTGGATCAATAATTGGAGATGATCAAATTTATAATGTAATTGTAACATCACATGCATTTTTAATAATTTTTTTTATAGTTATACCTATTATAATTGGAGGTTTTGGAAATTGATTAGTCCCTTTAATATTAGGAGCACCAGATATAGCATTTCCTCGATTAAACAACATAAGATTTTGATTTTTACCACCTTCAATCACTCTTATTCTTTCAAGAAGATTAGTAAATTCTGGTTCAGGAACAGGATGAACTGTTTATCCACCCCTATCTAGAGGAATATCACACGCTGGAGCTTCAGTAGATTTAACAATTTTCTC…
RRMPG978-15|Polydrusus	8494	1439	13604	779	6855	3336	4040	2857	4414	2032	295	1712	133	682	860	1236	2072	2511	677	511	378	TATTCTTTATTTTATTTTAGGATTATGATCTGGAATAATTGGATCTTCTATAAGTATTATTATTCGTATAGAATTAGGTAATCCAAATTCATTAATTAATAATGATCAAATTTACAATTCTATTATTACTGCTCACGCTTTTATTATAATTTTTTTTATAGTAATGCCTATTATAATTGGAGGGTTTGGAAATTGATTAATCCCCCTTATATTAGGAGCTCCTGATATAGCATTTCCACGAATAAATAACATAAGATTTTGATTATTAATTCCCTCATTAATAATATTAATTTCAAGAAATATTATAAATCAAGGAATTGGAACTGGGTGAACAGTCTACCCCCCATTATCTTCTAATATTAATCATGAAGGAAATTCTCTAGATTTAGGAATTTTTTC…
RRSSC4805-15|Coenonympha	2333	2079	170	1196	3209	4881	3776	2394	3716	1571	666	2252	3421	2546	2250	3947	2863	1419	1673	425	265	AACTTTATACTTCATTTTTGGTATTTGAGCAGGAATAGTCGGTACTTCCTTAAGTTTATTAATTCGAGCAGAATTAGGAAATCCAGGACAATTAATTGGAGATGATCAAATTTATAATACTATTGTTACAGCTCACGCTTTTATTATAATTTTTTTCATAGTTATACCTATTATAATCGGAGGATTTGGAAATTGATTAGTACCTTTAATATTAGGAGCTCCAGATATAGCATTTCCACGAATAAATAATATAAGATTTTGACTTTTACCTCCTTCATTAACTTTATTGATTTCTAGAAGAATTGTAGAAAATGGAGCTGGAACAGGATGAACTGTTTACCCACCTTTATCATCTAATATTGCTCACGGAGGTAGTTCAGTTGATTTAGCTATTTTTTC…
RRSSC7787-15|Microdon	972	2736	1422	1344	328	3306	6527	5868	6874	23	712	1024	1676	3607	3340	566	1935	3566	303	653	356	TATATTATATTTTATCTTTGCTATATGATCTGGTATAATTGGAGCTTCTCTAAGTATAATTATTCGAATAGAATTAAGATGCCCTGGTGCATGAATTAATAATGATCAAATTTATAATACAATTATTACTTCACACGCCTTCATTATAATTTTTTTTATAGTTATACCATTTATAATTGGAGGTTTTGGAAATTGATTAGTTCCATTAATAATTGGAGCTCCTGATATAGCTTTCCCACGTATAAATAATATAAGATTTTGATTATTACCCCCTTCACTTCTTATATTATTAATAAGTGGAATTTTAGGAGCTGGTTCAGGTACTGGATGAACTATTTATCCACCTTTATCATCCTTTATTTATCACTCTTCTTCCTCAATAGATTTTACTATTTTTTC…
RRSSC4125-15|Atalantycha	7754	3358	1121	7933	990	2901	2874	3581	2416	189	3818	2027	2543	2425	1847	2317	2290	11	758	328	553	AACTTTATATTTTATTTTTGGAGCTTGAGCAGGAATAGTAGGAACTTCTCTTAGTATATTAATTCGAGCAGAATTAGGACACCCGGGTTCATTAATTGGAGATGATCAAATTTATAATGTTATTGTAACTGCTCATGCATTTGTAATAATTTTTTTTATAGTTATACCTATTATAATTGGAGGATTCGGAAATTGATTAGTTCCATTAATATTAGGAGCGCCAGATATAGCTTTTCCTCGAATAAATAATATAAGATTCTGAATATTACCTCCATCCCTTACATTACTATTAACTTCTTCAATAGTAGACGCAGGGGCTGGTACTGGATGAACAGTATACCCTCCTTTAGCAGCTGGAATTGCTCATAGAGGAGCATCAGTAGATTTAGCAATTTTTTC…
RRMFD008-15|Lepyronia	4931	8310	9090	1312	459	3941	3032	3329	3624	2361	2269	199	14	1904	1434	276	1497	3581	1329	353	367	AATTTTATATTTCTTATTTGGCATATGAGCTGGAATAATTGGATCATCTTTTAGTATAATCATTCGAATAGAACTTGGAAATCCTGGATTCCTTATTAATAATGATCAAATTTACAATTCAATTGTTACTATACATGCATTCATCATAATTTTTTTTATAGTAATACCCATTATAATTGGAGGATTTGGAAATTGACTAACCCCTTTAATATTAGGTGCCCCTGATATAGCTTTCCCCCGAATAAATAATATAAGATTTTGATTATTACCACCATCACTTTTTTTATTAATTAATAGTTCATTTATTAATCAAGGAGTTGGGACAGGTTGAACTATATACCCCCCCCTATCATCTAATATTAATCATGAAGGTATATCAATAGATTTATCAATTTTTTC…
RRGCO550-15|Ypsolopha	2722	5193	2044	1932	2533	5638	2693	2691	3995	93	471	1994	2424	2148	1553	3026	3166	721	967	438	532	AACACTATATTTTATTTTTGGAATTTGAAGAGGAATAGTAGGAACATCCTTAAGATTATTAATTCGCGCTGAATTAGGAAACCCAGGATCATTAATTGGCGATGATCAAATTTATAATACTATTGTTACAGCTCATGCATTTATTATAATTTTTTTTATAGTTATACCTATTATAATTGGGGGATTTGGAAATTGATTAGTCCCCTTAATATTAGGAGCCCCAGATATAGCATTCCCTCGAATAAATAACATAAGATTTTGATTATTACCCCCCTCTTTAACTTTACTGATTTCTAGAAGAATTGTAGAAAATGGAGCTGGAACAGGATGAACGGTTTACCCCCCCCTTTCATCTAATATTGCTCACAGAGGAGGATCTGTTGATTTAACTATTTTCTC…
RRMFI4172-15|Banchus	0	7249	3701	679	5303	3840	1684	2118	2183	5207	1138	800	328	1986	1381	1600	3765	1794	387	566	621	AACATTATACTTTATTTTTGGGGCTTGAGCAGGAATAGTAGGAACTTCTTTAAGAATTTTAATTCGGGCTGAATTAGGACATCCTGGAGCATTAATTGGTGATGATCAGATTTATAATGTAATTGTCACAGCTCATGCTTTTATTATAATTTTCTTCATAGTAATACCTATTATAATTGGAGGATTTGGAAATTGATTAGTTCCATTAATATTAGGAGCCCCTGATATAGCTTTCCCACGAATAAATAATATAAGATTTTGAATACTACCTCCTTCTATTACTCTATTAGTATCTAGTAGTTTAGTCGAAACAGGAGCAGGAACAGGTTGAACAGTATACCCCCCACTTTCATCTGGAATTGCTCATGCTGGAGCATCTGTAGATTTAGCAATTTTCTC…
RRGCO694-15|Choristoneura	2195	6759	1229	1407	830	5052	4567	4350	6198	223	8287	525	2583	1841	1196	435	649	522	1107	389	401	AACTTTATATTTTATCTTTGGAGCTTGATCAGGAATAATTGGAACTTCATTAAGTATTTTAATTCGAACTGAATTAGGACATCCTGGAGCTTTAATTGGTGACGATCAAATTTATAATGTAATTGTAACAGCTCATGCTTTTGTAATAATTTTCTTTATAGTAATACCTATTATAATTGGTGGATTTGGAAATTGATTAGTACCTTTAATACTTGGAGCTCCAGATATAGCATTTCCTCGAATAAATAATATAAGATTCTGACTTTTACCTCCTGCTTTAATTTTATTACTAACTAGCAATATAGTTGAAAATGGAGCTGGAACAGGATGAACTGTTTATCCACCCCTATCTTCAAATATTGCTCATAGAGGAGCTTCTGTAGATTTAACAATTTTTTC…
RRSSA4311-15|Serica	172	6140	0	248	2982	1562	4956	3632	3122	48	865	3861	11	6325	4159	215	1540	84	4308	2	16	AATATTATATTTCATTTTTGCTATATGAGCAGGGATAATTGGAACATCGTTAAGAATAATTATTCGAATAGAATTAAGAATACCTGGAATATGAATTAATAATGATCAAATATATAATACTATTGTTACATCACATGCATTTATTATAATTTTCTTTATAGTTATACCATTTATAATTGGAGGATTCGGAAATTGATTAATTCCTATTATAATTGGAGCTCCAGATATAGCTTTTCCACGAATAAATAATATAAGATTTTGATTATTACCACCATCTTTAATATTATTATTAATAAGAAGAAGTTTATACTCAGGATCAGGTACTGGATGAACAATTTATCCTCCATTATCATCTTCTATATACCATCCTTCATTATCTGTAGACTTTACAATCTTTTC…
RRSSA2273-15|Ellychnia	16559	3620	6	279	1819	1004	2921	2743	1311	10	140	2014	8	2849	2373	2505	3531	5455	1598	76	15	AACTTTATATTTTATTTTCGGAGCATGATCTGGAATAATTGGAACTTCATTAAGTATTTTAATTCGAACTGAATTAGGACATCCTGGCTCATTAATTGGTGATGATCAAATTTATAATGTAATTGTTACAGCTCATGCATTTATTATAATTTTTTTTATAGTAATACCTATTATAATTGGAGGATTTGGAAATTGATTAGTACCTTTAATATTAGGGGCTCCAGATATAGCTTTCCCACGAATAAATAATATAAGTTTTTGATTACTTCCTCCTTCATTAACACTTTTATTAGCAAGTAGTATAGTAGAAAATGGAACTGGGACAGGATGAACAGTTTACCCACCTTTATCTTCAGTGATTGCTCATGGAGGGTCTTCTGTTGATTTATCAATTTTTTC…
RRMFC2065-15|Ferdinandea	0	1827	10392	3445	246	5445	2270	2581	3069	1237	1019	2395	353	2328	1728	106	711	2152	1072	961	1264	AACTTTATATTTTATTTTTGGAGCATGATCAGGAATGGTGGGAACCTCATTAAGTATTTTAATTCGAGCTGAATTGGGGCACCCTGGAGCATTAATTGGAGATGATCAAATTTATAATGTAATTGTAACAGCTCATGCTTTTATTATAATTTTCTTTATAGTAATACCTATTATAATTGGAGGGTTCGGAAATTGACTAGTTCCTTTAATATTAGGTGCCCCAGATATAGCCTTCCCTCGAATAAATAATATGAGTTTTTGACTTCTACCCCCCGCATTAACTTTATTGTTGGTAAGAAGTATAGTAGAAAATGGAGCTGGGACAGGATGAACTGTTTACCCTCCCTTATCTTCTAATATTGCCCATGGTGGAGCTTCTGTTGATTTAGCAATTTTTTC…
RRSSA5999-15|Helius	2345	4495	402	1141	5584	2915	1880	2631	2567	36	1443	2038	2301	2757	2524	2394	2651	29	1025	522	771	AACTTTATATTTTATTTTTGGAATTTGAGCCGGAATAATTGGAACTTCATTAAGATTGCTAATTCGAGCTGAATTAGGTACCCCAGGATCTTTAATTGGAGATGATCAAATTTATAATACTATTGTAACTGCCCATGCTTTTATTATAATTTTCTTTATAGTTATACCAATTATAATTGGTGGGTTTGGTAATTGATTAGTCCCTTTAATATTAGGAGCCCCTGATATAGCTTTCCCACGAATAAATAATATAAGTTTCTGACTCTTACCCCCCTCTTTGACTTTACTGATTTCAAGTAGAGTTGTAGAAAATGGAGCTGGAACAGGATGAACAGTTTACCCCCCACTTTCATCTAATATTACACACAGTGGAAGATCTGTAGATTTAGCTATTTTTTC…
RRMFI4068-15|Compsilura	12434	2825	4436	4186	2458	2642	999	1175	1666	2542	1744	1113	1644	1074	1051	1157	2536	2143	949	587	580	AACTTTATATTTCATTTTTGGAGCTTGAGCCGGAATAGTAGGAACTTCTTTAAGTATACTAATTCGATTAGAATTAGGTCACCCTGGAGCTATAATTGGCAATGATCAAACTTATAATGTAATTGTTACAGCTCATGCTTTTATTATAATTTTTTTTATAGTAATACCAATTATAATTGGTGGATTTGGAAATTGATTAGTTCCTTTAATATTAGGTGCCCCTGATATAGCATTTCCTCGAATAAATAATATAAGTTTTTGATTACTTCCACCTTCTTTAATTTTACTATTGATAAGTAGTATAGTTGAAAACGGAGCTGGAACAGGATGAACAGTTTACCCACCACTTTCAGCTAATATTGCTCATAGAGGAACTTCTGTTGATTTAGCAATTTTTTC…
RRMFG2635-15|Dryomyza	427	2729	10182	3543	299	2344	1570	1060	774	9651	1068	2878	2794	1193	793	258	334	424	1383	477	658	AACATTATATTTCATCTTTGGAATTTGAGCAGGATTACTAGGCACCTCACTTAGTGTACTTATTCGAATAGAATTAAGAACCCCAGGAACTTTTATTGGAAATGACCAACTTTATAACGTAATAGTTACATCACATGCTTTTTTAATAATTTTCTTTATAATTATACCTATCATAATTGGGGGATTTGGAAATTGATTAGTTCCTCTTATAATTGGAGCTCCAGATATAGCATTCCCCCGAATAAACAATATAAGATTTTGACTCTTACCCCCATCTATTACTCTTCTACTAATTAGATCAATAGTAGAAAAAGGAGCTGGAACTGGATGAACAGTATACCCCCCATTATCAGCTAACATTGCTCATTCAGGAAAATGCGTTGATTTAACCATTTTCTC…
RRGCO365-15|Epinotia	3082	5207	61	1159	3597	2314	4123	3913	4606	780	2073	1151	1783	2618	2144	1800	2492	469	721	498	304	AACACTTTATTTTATTTTTGGAATTTGAGCAGGAATATTAGGAACTTCTTTAAGATTATTAATTCGAGCTGAATTAGGTAATCCAGGATCTTTAATTGGAGATGATCAAATTTATAATACTATTGTAACAGCACATGCTTTTATTATAATTTTTTTTATAGTAATACCAATTATAATTGGAGGATTTGGAAATTGATTAGTACCATTAATATTAGGGGCTCCTGATATAGCATTCCCACGAATAAATAATATAAGATTTTGATTATTACCCCCCTCTATTACTTTACTAATTTCTAGAAGAATTGTAGAAAATGGAGTAGGTACTGGATGAACAGTTTACCCCCCACTATCATCTAATATCGCTCATGGAGGAAGATCCGTTGATTTAGCAATTTTTTC…
RRGCO183-15|Amphipoea	2997	4188	1399	2230	325	3000	4095	3935	5503	144	5523	2027	2651	2126	1758	2590	1898	37	308	128	131	AATATTGTATTTTTTTTTTGGAATATGGGCTGGTATAGTAGGTTTATCAATAAGATTAATTATTCGTTTAGAATTGGGTTTACCTGGTAGAATATTGGGTAATGATCAAATTTATAATAGAATAGTAACTTCACATGCTTTTGTTATAATTTTTTTTATAGTAATACCAATTATATTAGGGGGTTTTGGAAATTGATTAATTCCTTTAATATTAGGGGCTCCTGATATAGCTTTCCCTCGAATAAATAATATAAGATTTTGATTATTATTTCCTTCATTAATTTTATTAATTTTAAGTGGATTTGTTAATGTTGGGGTTGGAACTGGATGAACAGTTTATCCTCCTTTATCTTCTATTATAGGTCATTCAGGTATTTCTGTTGATTTAGTTATTTTTTC…
RRMFD050-15|Chalcosyrphus	7421	3340	12873	1058	562	2913	1931	2527	2410	2712	2659	1434	495	1297	932	155	650	2637	1132	543	349	AACTTTATATTTTATTTTTGGTGCATGATCAGGAATAGTAGGAACTTCCTTAAGTATATTAATTCGAGCTGAATTAGGAAATCCAGGATCATTAATTGGTGACGATCAAATTTATAATGTTATTGTTACTGCTCATGCATTTGTCATAATTTTTTTTATAGTAATACCAATTATAATTGGAGGATTTGGAAATTGATTAGTTCCTTTAATATTAGGAGCTCCTGATATAGCTTTTCCTCGAATAAATAATATAAGTTTTTGATTACTTCCTCCTTCTTTAACTCTTTTATTAATGAGAAGAATAGTGGAAAGTGGAGCAGGTACAGGATGAACAGTCTACCCACCCCTATCTTCTGGTATTGCACATGCTGGAGCATCTGTTGATTTAGCTATTTTTAG…
RRGCO534-15|Limnaecia	2033	5112	3792	1419	4986	1621	2593	2306	3233	179	3936	1830	2409	1261	1544	2157	1617	473	827	409	519	TACACTTTACTTTATTTTCGGAATATGATCAGGTATAGTAGGTACCGCAATAAGATGAATCATCCGAGTAGAGCTCGGACAACCGGGCACTTTCATTGGAGATGATCAAATCTATAATGTAATTGTTACAGCTCACGCATTTATTATAATTTTCTTCATAGTAATACCAATCATAATTGGAGGATTCGGTAATTGACTAGTACCCTTAATAATTGGAGCCCCAGATATAGCCTTTCCCCGAATAAATAATATAAGATTCTGATTATTACCCCCCTCACTAACATTATTATTAATAAGTAGCCTAGTAGAAATAGGAGCAGGAACAGGATGAACAGTTTATCCTCCACTATCAAGAAATCTATCACATAGAGGTGCATCCGTAGATTTAGCAATCTTCTC…
RRMFB1224-15|Tachinomyia	803	2641	2006	917	2965	4441	2414	2272	1568	274	3562	1796	3504	1707	1354	2333	2202	1039	899	431	787	AACATTATATTTTTTATTTGGAACATGAGCTGGAATAGTGGGGACATCCTTAAGAATTTTAATTCGTGCAGAATTAGGACACCCTGGAGCATTAATTGGAGATGATCAAATTTATAATGTAATTGTTACTGCTCATGCTTTTGTAATAATTTTTTTTATAGTAATACCTATTATAATTGGAGGATTTGGAAATTGATTAGTTCCTTTAATATTAGGTGCTCCTGATATAGCATTTCCTCGAATAAATAATATAAGTTTTTGATTATTACCTCCTTCTTTAACTTTATTATTAGTAAGTAGTATAGTAGAAAATGGAGCTGGAACTGGATGAACAGTTTATCCTCCTCTTTCAGCAAGTATTGCTCATGGAGGAGCTTCTGTTGATTTAGCTATTTTTTC…
RRSSC1966-15|Eustalomyia	1982	1496	2899	1580	76	2285	2106	2471	2495	52	1821	1434	1089	1592	1686	2923	5010	2971	1294	553	566	TACTTTATATTTTATTTTTGGAGCCTGAGCTGGCATAGTAGGAACATCCCTTAGTGTTTTAATTCGAGCTGAATTGGGTCATCCAGGAGCTCTAATTGGTGACGATCAAATTTATAATGTAATTGTTACTGCTCATGCTTTTATTATAATTTTTTTTATAGTTATACCAATTATAATTGGAGGATTTGGAAATTGATTAGTTCCTTTAATACTTGGTGCACCAGATATAGCTTTCCCTCGAATAAATAATATAAGTTTTTGAATATTACCCCCATCTCTTACCCTTCTTCTTGCTAGAAGCTTAGTTGAAAATGGAGCTGGAACAGGATGAACAGTTTATCCTCCTTTATCAGCGGGAATTGCCCATGCAGGAGCTTCTGTCGATTTAGCTATTTTTTC…
RRGCO601-15|Eudeilinia	4138	5774	4767	2587	4926	2789	2362	2319	3784	242	248	1029	1457	1453	1255	1327	2661	1850	744	297	403	AACTCTTTATTTTATTTTCGGAATTTGATCTGGATTAGTAGGATCCTCTTTAAGATTCCTTATTCGAATTGAACTTAGAACTCCTGGGTCTTTAATTGGAAATGACCAAATTTATAATGTAATTGTCACTTCTCATGCATTTATTATAATTTTCTTTATAGTTATACCCATTATAATTGGAGGATTTGGAAATTGATTAGTTCCTTTAATATTAGGATCCCCAGATATAGCTTTCCCTCGAATAAATAATTTAAGATTTTGATTTTTACCTCCTTCATTACTCCTTCTAATTTTAAGAAGAATAATAAATTCAGGGGCTGGCACAGGTTGAACTGTTTACCCTCCTCTATCATCAAATCTATCTCACCTTGGGAGATCAGTAGATTTAACTATTTTCTC…
RRMPG961-15|Podabrus	4694	2327	4364	1993	476	716	2768	2439	1959	57	2415	901	2	2172	2231	1876	3447	3211	1364	662	612	AACTTTATATTTTATTTTTGGAATTTGATCAGGAATACTAGGAACATCTTTAAGTATGTTAATTCGAGCAGAATTAGGAAATCCTGGATCTTTAATCGGAGATGATCAGATTTATAATACAATTGTAACTGCTCATGCTTTCATTATAATTTTTTTTATAGTTATGCCAATTATAATTGGAGGATTTGGAAATTGATTAGTACCATTAATATTAGGAGCACCTGATATGGCCTTCCCACGACTTAATAATATAAGTTTTTGACTTTTACCACCTTCTTTAGCCTTACTAATTTCTAGTAGAATTGTGGAAAATGGAGCAGGAACAGGATGAACAGTGTACCCCCCACTCTCATCCAATATTGCCCATAGAGGAAGTTCTGTAGATCTAACAATTTTCTC…
RRSSC4130-15|Acropteroxys	112	485	109	6403	8811	148	892	754	272	1998	56	2198	1739	1335	1222	4251	1667	1165	1254	789	557	AACTTTATATTTTATTTTTGGAATCTGATCTGGTATAATTGGTACTTCTTTAAGTCTTTTAATTCGAACTGAATTAGGTAATCCTGGGTCACTCATTGGAGATGATCAAATTTATAATACAATTGTTACTGCTCACGCTTTTATTATAATTTTTTTTATAGTTATACCAATTATAATTGGAGGATTTGGTAATTGATTAATCCCCCTTATATTAGGAGCCCCTGATATAGCATTCCCCCGAATAAATAATATAAGATTTTGACTTTTACCTCCTTCTCTAATTCTTCTTATTTCTAGAAGTATTGTTGAAAATGGGGCAGGAACTGGTTGGACAGTATACCCCCCTTTATCTTCTAATATCGCCCATAGAGGAAGTTCTGTAGATTTAGCTATTTTTTC…
RRSSA229-15|Hydrophoria	2564	6434	163	1628	190	2170	2789	2953	1649	163	153	2860	5209	3423	1833	745	1119	682	2416	502	281	AACTCTTTATTTTATATTTGGGGCTTGAGCTGGAATAGTGGGAACTTCTTTAAGAATTCTAATTCGAGCCGAATTAGGGCATCCAGGAGCCTTAATTGGGGATGACCAAATTTATAATGTTATTGTAACAGCTCATGCTTTTGTTATAATTTTTTTTATAGTTATACCTATTATAATTGGAGGATTTGGTAATTGATTGGTCCCCTTAATATTAGGAGCCCCTGATATAGCATTTCCTCGAATAAATAATATAAGTTTTTGAATACTTCCCCCATCATTAACCCTTTTATTAGCAAGCAGTATAGTAGAAAATGGGGCAGGGACAGGATGAACAGTTTACCCTCCACTATCTGCAGCAATTGCTCATGGAGGAGCTTCTGTTGACTTAGCTATCTTTTC…
RRMPE026-15|Phormia	3368	3358	4614	4032	6971	2216	932	1112	577	277	698	1958	1927	2428	1707	2813	2534	435	636	203	138	AACATTATATTTTATTTTTGGAATTTGAGCTGGAATAGTAGGAACCTCATTAAGATTATTAATTCGAGCTGAATTAGGAAATCCTGGATCATTAATTGGAGATGATCAAATTTATAATACAATTGTAACAGCCCATGCTTTTATTATAATTTTTTTTATAGTTATACCTATTATAATTGGAGGATTTGGTAATTGATTAGTACCTTTAATATTAGGAGCTCCAGATATAGCATTTCCTCGAATAAATAATATAAGTTTTTGACTTCTTCCCCCATCTTTAACTTTATTAATTTCAAGAAGAATTGTAGAAAATGGAGCAGGAACAGGATGAACAGTGTACCCCCCACTTTCTTCTAATATTGCTCATGGAGGTAGATCTGTAGATCTTGCTATTTTTTC…
RRGCO486-15|Feltia	5626	4797	2054	716	284	4151	2621	2495	4550	275	6562	1908	555	846	606	144	491	3408	1370	433	432	AACATTATATTTTATTTTTGGTATTTGAGCTGGAATAGTAGGAACTTCTTTAAGTTTATTAATTCGAGCTGAATTAGGAAATCCAGGATCTTTAATTGGAGATGATCAAATTTATAACACTATTGTTACAGCACATGCTTTTATTATAATTTTTTTCATAGTAATACCTATTATAATTGGAGGATTTGGTAATTGACTTGTTCCTTTAATATTAGGAGCTCCAGATATAGCATTTCCTCGAATAAATAATATAAGTTTTTGACTTCTTCCCCCCTCATTAACTTTATTAATTTCGAGAAGAATTGTAGAAAATGGAGCAGGAACAGGATGAACAGTTTACCCCCCACTTTCATCTAATATTGCTCATGGAGGAAGATCAGTAGATTTAGCTATTTTTTC…
RRMFI4226-15|Gaurotes	1068	5858	90	3859	27	1159	3066	2208	3263	8975	4070	7	129	619	635	178	115	0	1845	958	882	AGTTTTATATTTTATTTTTGGAATATGAGCAGGAATAATTGGTTCTTCTATAAGATTAATTATTCGTATAGAATTAGGAAATCCAGGATTTTTAATTAATAATGATCAAATTTATAATTCTTTTGTTACAGCCCATGCATTTATTATAATTTTTTTTATAGTTATACCAATTATAATTGGAGGATTCGGAAATTGATTAATCCCTTTAATATTAGGATCTCCTGATATAGCCTTTCCTCGAATAAATAATATAAGATTTTGACTTCTTCCCCCTTCAATTATATTATTAATTTTTAGATCTTTAACAAATACAGGAGTTGGAACTGGATGAACAGTTTATCCTCCATTATCATTAAATATTAATCATGAAGGAATATCAGTAGATATAGCAATTTTTTC…
RRSSA3974-15|Macrorchis	4293	2806	1	2856	1322	2126	1963	2019	2508	110	840	2374	3285	2021	1779	1600	2441	253	1552	766	619	GACCCTATATTTTATATTTGGTATTTGAGCTGGAATGCTTGGAACATCCCTTAGATGACTAATTCGTATTGAATTAGGACACCCCGGATCTTTTATTGGGGATGATCAAATTTATAATGTAATTGTTACTGCACATGCTTTTATTATAATTTTCTTTATGGTTATACCTATTATAATTGGAGGATTTGGTAACTGACTAGTCCCATTAATAATTGGGGCACCAGATATAGCATTCCCTCGTATAAATAATATAAGTTTCTGACTACTACCTCCTTCAATTACATTATTAATTATTAGAAGAATTGTAGAAAAGGGGGTAGGAACAGGATGAACAGTTTATCCTCCTCTATCAGCTAACGTAGCCCATAATGGTGCATCAGTGGATCTAGCCATTTTCAG…
RRSSC1986-15|Dolichopus	8132	2376	6076	4336	1183	1463	1454	1226	722	128	487	2163	2654	3717	2731	12	3029	696	297	9	788	AACTCTGTACTTTATCTTTGGCGCATGGGCAGGTATACTAGGAACATCCCTAAGCCTATTAATCCGCGCCGAATTAGGAAACCCTGGATCTCTAATCGGTAATGATCAAATTTACAACGTCATTGTTACTGCACACGCATTCATCATAATTTTCTTCATAGTTATACCAATCATAATCGGAGGATTTGGAAATTGATTAGTACCATTAATGCTAGGAGCCCCAGACATAGCTTTCCCTCGAATGAATAACATAAGATTTTGACTCCTACCACCCTCATTAAGACTTCTTCTGATAAGAAGAATCGTAGAAAATGGAGCAGGAACAGGATGAACTGTTTACCCCCCACTTTCATCCAACATTGCCCATAGAGGTTCCTCAGTAGACCTGGCTATTTTTAG…
RRGCO473-15|Anania	399	1364	1596	258	1583	2470	2166	2299	3159	35	567	2006	745	1715	1765	2391	3045	3948	1351	464	446	AACGTTATATTTTATTTTTGGAATTTGAGCAGGGATAGTTGGAACTTCTTTAAGTTTATTAATTCGTGCAGAATTAGGAAACCCAGGATTTTTAATTGGAGATGATCAAATTTACAATACTATTGTTACAGCTCATGCCTTTATTATAATTTTTTTTATAGTTATACCAATTATAATTGGAGGATTTGGAAATTGATTAGTACCTTTAATATTAGGGGCTCCTGATATAGCTTTCCCACGAATAAATAATATAAGATTTTGATTATTACCCCCCTCTTTAATATTATTAATTTCAAGAAGAATTGTAGAAAATGGAGCTGGAACAGGATGAACAGTTTACCCTCCCCTCTCATCTAACATTGCTCATGGGGGAAGATCAGTTGACTTAGCAATTTTCTC…
RRSSA4461-15|Cyrtolobus	52	1674	178	2316	4414	3489	4025	2692	4638	209	2192	1510	2882	1444	1283	1723	1937	0	173	332	547	AACTCTTTACTTTATTTTTGGGGCTTGAGCAGGTATAATAGGAACATCTTTAAGAATTCTTATTCGAGCTGAACTAGGACATGCAGGATCTCTAATTGGTGATGATCAAATCTATAATGTTATTGTTACTGCTCACGCATTCGTCATAATTTTCTTTATAGTTATACCTATTATAATTGGAGGATTTGGAAATTGACTTGTCCCATTAATATTAGGAGCCCCTGATATAGCCTTTCCCCGAATAAATAATATAAGTTTCTGGCTTCTACCTCCATCATTAACCCTTCTTCTAGCAAGAAGTATAGTTGATAACGGAGCAGGGACAGGATGAACAGTTTATCCACCCCTATCAGCAGGAATTGCTCATGGAGGAGCATCTGTAGATTTAGCAATCTTTTC…
RRSSC4131-15|Coleomegilla	110	3101	12154	914	3096	1883	2835	2422	3821	135	315	759	1536	994	1258	1806	1945	295	52	255	728	AACTCTTTATTTTATTTTTGGAGCTTGAGCAGGAATAGTTGGAACATCTATAAGATTACTAATTCGAACTGAATTAGGAAACCCCGGATCTTTAATTGGAGATGATCAAATTTATAATGTAATTGTTACAGCTCATGCTTTTGTCATAATTTTTTTTATAGTTATACCCATTATAATTGGAGGATTCGGAAATTGATTAGTTCCCCTTATATTAGGAGCCCCTGATATAGCTTTTCCCCGAATAAATAATATAAGATTTTGACTACTTCCACCTTCATTAACTCTTTTATTAATAAGAAGAATTGTAGAAAAAGGAGCAGGAACAGGATGAACGGTTTATCCCCCCCTTTCATCAAATATTGCTCATGGTGGTTCTTCTGTTGATTTAGCTATTTTTAG…
RRGCO061-15|Calophasia	4712	5488	2229	2326	6314	3374	1686	2106	2259	208	1676	1358	968	1358	1035	1560	1840	389	325	205	322	AATTCTATATTTTATCTTTGCTATTTGATCGGGAATAATTGGCTCCTCTATAAGAATAATCATTCGACTAGAGTTAGGATCTCCTGATTCACTAATTCTTAATGATCAAACTTTCAATACCATCGTTACAAGTCATGCTTTTATTATAATTTTTTTTATAGTTATACCTTTTATAATTGGGGGATTTGGTAATTTTTTAATTCCACTTATACTAGGATCTCCTGATATAGCTTACCCTCGTTTAAATAACATAAGATTTTGATTACTTCCCCCATCGATCTCCTTATTAATCCTAAGAAATTTTATTAATGAAGGATCTGGAACTGGTTGAACTATCTACCCCCCTCTATCATCAAATACCTTCCATAGTGGCCCCTCTATTGACCTGACTATCTTTTC…
RRGCO580-15|Chrysoteuchia	2571	3229	976	844	537	882	4607	3847	4410	101	4042	2755	1570	1938	1456	282	310	699	1731	459	505	AACACTATACTTCATATTCGGAATATGGTCAGGAATAATTGGAATAATATTAAGAATAATTATTCGAGTTGAATTAGGTCAACCCGGGCCATTTATTAATAATGATCAAATCTATAATACAATCATTACATCACATGCATTTATTATAATCTTCTTTATAGTAATACCAATTATAATTGGGGGGTTTGGGAACTGGCTTATACCAATTATAATTGGAGCCCCTGATATAGCATTTCCACGAATAAACAATATAAGATTTTGATTATTACCGCCATCAATTACAATATTACTAATTAGATCTATAGTTGAATCAGGAGTAGGAACTGGATGAACAGTATACCCCCCACTATCAAGAAACATAGGTCACTCTGGTCCTAGAGTTGAATTTGCAATCTTTTC…
RRMFC1694-15|Brachypalpus	10035	4606	9069	1606	376	660	2162	2284	2068	49	2149	1763	421	1128	960	219	566	2456	1175	429	387	AATTTTATATATTATATTTGCTATATGATCAGGTATAATCGGAGCATCAATAAGATTAATTATTCGAATAGAATTAAGAACCCCAGGAAATTGAATTAATAATGATCAAATTTATAACTCATTAGTTACTGCTCATGCCTTTTTAATAATTTTTTTTATAGTTATACCATTTATAATTGGGGGATTTGGAAATTGATTAATCCCTCTAATATTAGGATCACCAGATATATCTTTTCCTCGTTTAAATAATATTAGTTTTTGATTATTACCCCCATCATTACTACTATTATTATTAAGAAATTTATTTTCAATAAGACCAGGAACAGGATGAACTGTTTATCCACCTTTATCATCATATTTATTTCACCCATCCCCATCAGTAGACTTAGCTATTTTTTC…
RRGCO646-15|Costaconvexa	5733	1780	116	5192	1187	3746	1443	1591	2024	305	2400	1326	1277	2192	1511	1554	2674	204	543	458	580	AACTTTATATTTTATTTTTGGAATTTGAGCAGGTATAGTAGGGACATCTCTTAGCTTAATTATTCGAATAGAATTAGGTAATCCAGGATTTTTAATTGGAGATGATCAAATTTATAATACTATCGTTACAGCTCATGCTTTTATTATAATTTTTTTTATAGTAATACCAATTATAATTGGAGGATTTGGTAATTGATTAGTTCCATTAATATTAGGAGCTCCTGATATAGCTTTTCCTCGTATAAATAATATAAGATTTTGATTATTACCTCCTTCATTAATTTTATTAATTTCAAGAAGTATTGTAGAAAATGGAGCTGGTACAGGATGAACAGTTTACCCACCCCTTTCATCTAATATCGCCCATAGAGGATCTTCAGTAGATCTAGCAATTTTCTC…
RRSSA3965-15|Trachysida	2524	5773	2	3726	445	3353	2743	2302	2665	664	6198	1340	2129	1574	909	54	326	265	995	598	424	AGTATTATACTTTATATTTGGAATATGAGCAGGAATAATTGGTTCATCTATAAGTATTATTATTCGTATAGAATTAGGTAATCCAGGTATATTTATCAATAACGACCAAATTTATAATTCTATTGTTACAGCTCATGCCTTTATTATAATTTTTTTTATAGTTATACCAATTATAATTGGAGGATTTGGAAATTGATTAATCCCATTAATACTTGGAGCCCCAGATATATCTTTCCCTCGAATAAATAACATAAGATTTTGATTATTACCCCCTTCATTACTTTTTCTTATTAATAGAAGAATAATTAATCAAGGTGTTGGAACCGGTTGAACTGTCTATCCACCTTTATCTTTAAATATTAATCATGAAGGTATATCAGTAGATATCGCAATTTTTTC…
RRMFB1097-15|Xylophagus	5339	3320	2478	743	1026	832	2139	2429	2617	105	1057	2444	679	1126	865	283	587	3579	1872	867	914	AACTTTATATTTTATTTTTGGAATTTGAGCAGGAATAGTAGGAACATCATTAAGTTTATTAATTCGAGCTGAATTAGGAAATCCAGGATCTTTAATCGGAGATGATCAAATTTATAATACTATTGTTACTGCACATGCTTTTATTATAATTTTTTTTATAGTTATACCAATTATAATTGGAGGATTTGGTAATTGATTAGTACCTTTAATACTTGGAGCTCCAGATATAGCATTCCCACGAATAAATAATATAAGATTTTGATTACTACCCCCTTCAATTACATTATTAATTTCTAGAAGAATTGTAGAAAATGGGGCAGGAACAGGATGAACAGTTTATCCTCCTCTATCTTCTAATATTGCTCATGGAGGAAGTTCTGTTGATTTAGCTATTTTTTC…
RRSSA2285-15|Enoclerus	3462	4861	6	3	879	1483	3411	2658	3615	0	2242	1164	1847	1548	1493	414	1036	4161	2236	4	1	AATCTTATATTTTATTTTTGGTATATGATCTGGAATAATTGGATCTTCAATAAGTATTATTATTCGAATAGAATTAGGGAATCCCGGATTTTTAATTAATAATGACCAAATCTATAATTCTATTGTTACAGCTCATGCATTTATTATAATTTTTTTTATAGTTATACCAATTATAATTGGAGGATTTGGAAATTGATTAATCCCATTAATATTAGGTGCACCTGATATAGCATTTCCACGAATAAATAATATAAGATTCTGATTACTACCCCCATCTATCTTATTATTAATTTTAAGAAGAATTTTTAATCAAGGAGTAGGAACTGGGTGAACTGTTTATCCTCCTTTATCATTAAATTTAAATCATGAAGGATTATCTGTAGATTTAGCCATTTTTTC…
RRMFD017-15|Chrysops	220	2400	8635	2309	190	1451	2004	1519	2096	1421	1130	1499	1562	1101	732	165	318	380	552	1064	1600	AACTCTATATTTCATTTTCGGTTCGTGAGCTGGAATAGTAGGAACTTCCCTCAGCCTACTTATTCGAGCAGAACTTGGAAATCCAGGATCCTTGATTGGTGACGATCAAATTTACAACGTAATCGTAACTGCTCATGCTTTCATCATAATTTTCTTCATGGTTATACCTATCGTAATTGGTGGATTTGGAAATTGGCTTATCCCATTGATACTAGGAGCTCCAGATATGGCTTTCCCTCGAATAAACAACATAAGATTTTGGTTACTTCCACCCTCTCTCACTCTTTTGCTGATAAGAAGAATAGTTGAAAGAGGAGCAGGAACAGGTTGAACAGTATACCCTCCCTTATCTTCAAATATCGCTCATGGAGGAGCTTCTGTTGATTTAGCAATTTTTAG…
RRSSC1824-15|Atrichomelina	342	398	12116	1454	32	790	687	651	560	5934	1092	1559	1466	513	534	576	865	1596	1238	742	374	AACTTTATATTTCATTTTTGGAGCTTGATCAGGAATAGTTGGAACTTCTCTAAGAATTCTAATTCGAGCAGAATTAGGGCATCCGGGAGCATTAATCGGTGATGACCAAATTTATAATGTAATTGTTACAGCTCATGCTTTTATTATAATTTTCTTTATAGTAATGCCAATTATAATTGGAGGATTTGGTAATTGATTAGTACCAATTATACTTGGAGCTCCAGATATAGCCTTCCCTCGAATAAATAATATAAGATTCTGACTACTTCCTCCAGCATTAACACTTCTTCTAGTTAGTAGTATAGTAGAAAACGGAGCTGGAACAGGATGAACTGTTTATCCACCCTTATCTTCTAATATCGCTCATGGAGGAGCTTCTGTTGATTTAGCAATTTTCTC…
RRMFG2629-15|Hemipenthes	850	3133	3265	3087	1660	2714	2413	2242	2742	159	799	1316	1246	2005	1816	774	1654	1	644	324	975	AACACTATATTTCATTTTTGGAGCTTGGGCAGGAATACTAGGAACTTCATTTAGTTTGTTAATTCGAGCAGAATTAGGAAGCCCAGGTTCACTCATTGGAAATGATCACATTTTTAATGTTATTGTAACAAGACATGCATTTATTATAATTTTCTTTATAGTGATACCTATCATAATTGGAGGTTTTGGTAACTGATTAGTACCCTTAATATTAGGAGCACCAGATATAGCATTTCCACGAATAAATAATATAAGATTCTGATTACTCCCTCCATCCCTATCTTTATTAATTATAAGAAGAATGATTGAAAGTGGGGCTGGAACAGGTTGGACAGTATATCCCCCTTTATCAGCAAATATTGCTCATAGAGGACCTTCAGTCGATCTGGCAATCTTTAG…
RRSSA4301-15|Allognosta	2613	2546	0	235	2861	2140	2557	2329	3542	589	2140	1534	1985	1692	1448	1311	1985	1148	904	177	103	AACTTTATATTTTATTTTCGGAGCATGAGCCGGAATAGTAGGAACTTCTTTAAGAATTCTTATTCGAGCTGAATTAGGTCACCCAGGAGCATTAATTGGAGATGATCAAATTTATAATGTAATTGTTACAGCTCATGCTTTTATTATAATTTTTTTTATAGTAATACCTATTATAATTGGAGGGTTTGGAAATTGACTGGTTCCTTTAATACTAGGAGCTCCTGATATAGCTTTCCCTCGAATAAATAATATAAGTTTTTGACTTTTACCTCCTGCATTAACTTTATTATTAGTAAGCAGTATAGTAGAAAACGGAGCTGGAACAGGATGAACTGTTTACCCACCCCTATCTTCAAATATTGCTCATGGGGGAGCTTCTGTTGATTTAGCAATTTTTTC…
RRGCO812-15|Parapsyche	21	3372	12	2712	1016	2158	1344	1437	2080	71	6107	3080	2754	1962	1717	2458	840	0	109	143	117	AACTTTATATTTTATTTTTGGTATTTGAGCAGGCATAGTAGGAACTTCATTAAGATTACTAATTCGAGCAGAATTAGGAACCCCCGGATCTTTAATTGGAGATGACCAAATCTATAATACTATTGTTACAGCTCATGCTTTTATTATAATTTTTTTTATAGTTATACCTATTATAATTGGAGGATTTGGAAATTGATTAGTACCATTAATATTAGGAGCCCCAGATATAGCTTTCCCACGAATAAATAATATAAGTTTCTGACTTTTACCCCCCTCCCTTACTCTTTTAATTTCAAGAAGAATTGTAGAAAATGGAGCAGGAACTGGATGAACAGTTTATCCCCCACTTTCATCTAATATTGCCCATGGAGGAAGTTCAGTAGACTTAGCTATCTTTTC…
RRGCO269-15|Dyspyralis	3091	2432	1541	775	1661	294	1963	1917	2797	0	195	1323	1996	1827	1444	513	2113	3589	1045	481	549	TACTTTATATTTCATCTTTGGAGCTTGATCAGGAATAATTGGAACTTCACTAAGAATCCTAATTCGAGCAGAACTAGGACACCCTGGAGCATTAATCGGAGATGACCAAATTTATAACGTAATTGTAACAGCTCATGCTTTTATTATGATTTTTTTTATAGTAATACCAATTATAATTGGTGGATTTGGTAATTGATTAGTTCCTCTTATATTAGGAGCCCCAGATATAGCTTTCCCCCGAATGAATAATATAAGTTTTTGACTACTACCTCCTGCATTAACCTTATTACTAGTAAGTAGTATAGTAGAAAACGGAGCTGGAACAGGATGAACTGTTTACCCCCCTCTATCATCTAATATTGCTCATGGAGGAGCATCAGTTGATCTAGCTATTTTCTC…
RRGCO336-15|Cabera	2719	2713	863	893	1517	954	1879	2049	2108	41	5554	1342	2112	1136	952	1419	2275	633	1028	401	239	AACAATTTATTTTATTTTTGGAATTTGAGCTGGAATAGTGGGTACTTCACTAAGAATAATTATTCGAACAGAACTCGGAACATCTGAATCATTAATTAAAAACGATCAAATCTATAATGTTTTAGTAACAGCTCATGCTTTTATTATAATTTTTTTTATGGTTATACCAATTATAATTGGAGGATTTGGAAACTGATTAGTTCCTCTAATAATTGGAGCTCCTGATATAGCCTTCCCTCGTATAAATAATATAAGTTTTTGATTATTACCTCCCTCTTTAAATTTTCTTCTAATTAGATCTATTGTTGAAAATGGAACTGGAACTGGATGAACAGTTTATCCACCTCTTTCTGCGAATATTGCTCATGCTGGCAGATCAGTTGATATCTCAATTTTTTC…
RRMFG2303-15|Podabrus	20268	3547	152	1650	157	491	3004	2840	2281	1	915	149	0	1783	1142	278	564	28	1114	737	852	AACATTATATTTCATTTTTGGAGCATGAGCTGGCATACTAGGTACATCATTTAGATTACTGATTCGGGCAGAATTAGGAAACCCCGGGTCATTAATTGGAAATGATCATATTTTCAATGTAATTGTAACTAGTCACGCTTTTATTATAATTTTTTTCATAGTTATACCTATTATAATTGGGGGATTTGGAAATTGACTAGTTCCTTTAATATTAGGGGCACCTGATATAGCATTTCCCCGTATAAACAATATAAGATTCTGATTACTTCCTCCTTCCCTATCTCTATTAATTATAAGAAGTATAGTCGAAAGAGGGGCAGGAACAGGTTGAACTGTTTACCCTCCCCTTTCAGCTAACATTGCTCATAGAGGGCCCTCAGTAGATTTAGCAATTTTTAG…
RRMFE3112-15|Phaonia	9512	6765	4026	1462	1191	152	1638	1506	656	163	60	2627	660	818	557	116	432	3280	1619	521	413	AACTTTATATTTTATTTTTGGAATTTGAAGAGGCATAATAGGAACATCTCTAAGATTATTAATTCGTACTGAATTAAGTACCCCTAGATCTTTAATTGGAGATGATCAAATTTATAATACTATTGTCACAGCTCATGCTTTTATTATAATTTTTTTTATAGTAATACCAATTATAATTGGAGGATTTGGTAATTGATTAATTCCTTTAATACTTGGAGCTCCAGATATAGCATTTCCCCGAATAAATAATATAAGTTTCTGACTTCTTCCACCTTCTTTAATTCTTTTAATTTCAAGAAGTATTGTAGAAAATGGAGCCGGAACAGGATGAACAATTTATCCCCCTCTTTCATCTAATATTGCTCACAGAGGCAGATCTGTAGATTTAACTATTTTTTC…
RRGCO709-15|Sitochroa	3873	3614	2666	1134	499	428	2918	2757	3809	923	284	1235	1728	1371	1048	1716	2151	495	677	300	247	AACTTTATATTTTATTTTTGGAATTTGATCTGGTATAGTAGGAACCTCTCTTAGTTTATTAATTCGAGCAGAATTAGGTAACCCTGGATCTTTAATTGGAGATGATCAAATTTATAATACTATTGTAACAGCTCATGCTTTTATTATAATTTTTTTTATAGTTATACCAATTATAATTGGAGGATTTGGAAATTGACTTATTCCTTTAATATTAGGAGCCCCTGATATGGCTTTTCCACGAATAAATAATATAAGATTTTGATTATTACCCCCCTCCTTAACTTTATTAATCTCAAGAAGAATTGTAGAAACTGGAGCTGGAACTGGATGAACAGTATATCCCCCTTTATCATCAAATATTGCTCATGGTGGAAGTTCAGTAGATCTAGCAATTTTTTC…
RRMFG2721-15|Camponotus	0	4815	6	22	18	8561	5175	4190	5899	168	1	16	0	742	225	9	6	856	0	795	1074	TACTTTATATTTCTTATTCGGAATTTGGGCTGGAATAGTAGGAACTTCTTTAAGTTTATTAATTCGTGCAGAATTAGGTCATCCTGGTGCATTAATTGGTGATGATCAAATTTATAATGTTATTGTTACTGCTCATGCCTTTGTTATAATTTTCTTTATAGTAATACCAATTATAATTGGAGGTTTTGGTAATTGATTAGTTCCTTTAATATTAGGAGCTCCAGATATAGCATTTCCTCGAATAAATAATATAAGTTTTTGACTTTTACCACCTTCTTTAACTTTACTTTTAGTAAGAAGAATAGTAGAAAATGGAGCTGGAACCGGATGAACTGTTTACCCTCCTCTTTCTTCTGTAATTGCACATGGAGGTGCTTCAGTAGATTTAGCAATTTTTTC…
RRSSC1967-15|Ravinia	11866	3999	10	4722	562	320	1398	1045	742	203	335	1981	3450	1975	1360	297	543	140	1681	488	269	AACCTTATATTTCATTTTCGGTGCATGATCAGGAATAGTAGGAACTTCCCTCAGTCTACTAATTCGAGCCGAACTTGGAAACCCCGGAACCTTGATTGGCGATGATCAAATTTACAATGTAATCGTCACAGCTCATGCATTTGTTATAATTTTCTTCATAGTAATACCCATTGTAATTGGGGGATTTGGAAATTGATTAGTTCCGTTGATACTTGGAGCACCTGACATAGCTTTCCCTCGGATAAATAACATAAGATTTTGGTTATTGCCTCCTTCTCTTACCCTCCTTTTAATGAGAAGAATAGCTGAAAGAGGGGCTGGAACTGGATGAACTGTTTATCCACCTCTTTCAGCTAATGTAGCCCACAGAGGAGCTTCTGTTGATTTAGCCATTTTCAG…
RRGCO747-15|Synchlora	746	2519	2637	817	1277	2968	2503	2505	3203	138	718	1932	1390	1346	1113	1490	2175	413	712	304	414	TATTTTATATTTTTTATTTGCTTTATGAGCTGGTATATTAGGAACATCTTTGAGAATAATTATTCGAATAGAGTTAGGAATAGCTGGTCAGTTAATTGGTAATGATCAAATTTATAATTCAATTGTTACTGCTCATGCTTTTGTTATAATTTTTTTTATAGTGATACCTTTTATAATTGGTGGATTTGGAAATTGGTTAGTTCCTTTAATATTAGGGGCTCCAGATATGGCTTTTCCCCGTATAAATAATATAAGATTTTGATTATTGCCTCCTTCTATTATTATATTATTATTAAGAAGATTTATAGATACTGGGGTTGGAACAGGTTGAACTGTTTATCCTCCTTTATCTTCAAATGCAGGTCATATGGGAATATCTGTAGATTTAGCTATTTTTTC…
RRMFC2036-15|Phorocera	921	2874	1247	779	2425	1567	1062	879	590	173	3366	2006	3174	1182	1052	2317	2131	639	1163	226	136	AACATTATATTTTATTTTTGGTGCTTGATCTGGTATAGTAGGGACATCTTTAAGTATTTTAATTCGAGCTGAATTGGGTCATCCTGGAGCTTTAATTGGTGATGATCAAATTTATAATGTAATTGTTACAGCTCATGCTTTTATTATAATTTTTTTTATAGTAATGCCTATTATAATTGGTGGATTTGGTAATTGATTAGTACCTCTAATATTAGGAGCTCCTGATATAGCATTCCCTCGAATAAATAATATAAGATTTTGATTATTACCTCCAGCTTTAACTTTATTACTAGTAAGAAGTATAGTAGAAAATGGAGCTGGTACTGGTTGAACTGTTTACCCTCCACTTTCATCTAACATTGCTCATAGAGGAGCTTCAGTTGATTTAGCAATTTTCTC…
RRMPE002-15|Hippodamia	2040	6264	263	699	5151	2070	2621	3981	2420	99	1126	62	0	685	494	870	2826	0	584	280	611	AACTTTATATTTTATTTTTGGAGCATGAGCAGGAATAGTAGGAACATCCCTCAGAGTTTTAATTCGATCAGAATTAGGTAATCCAGGATCATTAATTGGAGATGATCAAATTTATAATGTTATTGTCACAGCCCATGCATTTATTATAATTTTTTTCATAGTTATACCTATTATAATTGGAGGATTCGGAAATTGACTTGTACCCTTAATACTGGGGGCCCCCGACATGGCATTTCCTCGAATAAACAATATAAGATTCTGATTATTACCCCCCTCTTTAACTCTTCTAATTATAAGAAGAATTGTAGAAAGAGGAGCTGGTACAGGATGAACTGTTTATCCCCCTCTTTCAGCTAATGTAGCTCATAGAGGATCTTCTGTAGATTTAGCTATTTTTAG…
RRMFE3000-15|Palthis	2890	2085	1	1862	1797	1488	1815	1635	2758	129	2577	1439	1830	1047	951	1756	1506	231	729	369	334	AACTTTATATTTTATTTTAGGAGCTTGGGCAGGAATAGTAGGAACTTCATTAAGAATTTTAATTCGAGCAGAACTTGGTCATCCGGGAGCTTTAATTGGGGATGACCAAATTTATAATGTTATTGTAACAGCTCATGCATTTGTAATAATTTTCTTTATAGTAATACCTATTATAATTGGGGGATTTGGAAATTGATTAGTTCCATTAATACTTGGGGCTCCTGATATAGCCTTTCCCCGAATAAATAATATAAGTTTTTGGTTATTACCTCCTTCACTTACTCTTTTATTGGCAAGTAGTATAGTAGAAAATGGGGCTGGAACTGGATGAACAGTTTACCCCCCTCTTTCTGCTGGTCTTGCTCACACAGGAGCTTCAGTTGATTTAGCAATTTTTTC…
RRMPG975-15|Allograpta	1961	2867	2166	919	150	456	2004	1444	1795	71	2449	1884	562	696	625	239	505	2923	1577	695	607	AACTCTTTATTTTATTTTTGGAATTTGAGCAGGAATAATTGGATCTTCTTTAAGAATTATAATTCGAGCTGAATTAGGGAACCCAGGATCATTAATTGGAGATGATCAAATTTATAATACAATTGTAACAGCTCATGCATTTATTATAATTTTTTTTATAGTAATACCTATTATAATTGGAGGATTTGGAAATTGACTTGTTCCTTTAATACTTGGAGCCCCAGATATAGCTTTCCCACGTCTTAATAATATAAGATTTTGATTATTACCCCCTTCTATTTTACTATTAATCTCGAGAAGAATTGTAGAAAATGGAGCAGGTACGGGATGAACTGTTTATCCTCCTTTATCTTCTAATATTGCTCATGGTGGAAGTTCTGTAGATCTTGCTATTTTTTC…
RRMFG2353-15|Campaea	3353	1117	18226	3363	935	1195	577	593	736	58	383	208	61	1037	777	523	1137	727	318	134	178	AACTATTTATTTTATCTTCGGAATTTGAGCAGGAATAATTGGAACTTCATTAAGAATAATTATTCGAACTGAACTCGGCACTACTGAATCATTAATTAAAAATGACCAAATTTATAACGTATTAGTAACAGCCCATGCTTTCATTATAATTTTCTTTATAGTAATACCAATTATAATTGGAGGATTTGGCAACTGACTTGTACCCCTCATAATTGGAGCACCTGATATAGCTTTCCCACGTATAAATAACATAAGATTTTGACTTCTGCCCCCATCCCTGAATCTTCTTTTAATTAGAGCCCTAATTGAAAGAGGAACAGGAACTGGTTGAACTGTATACCCGCCCCTTTCCAGTAACCTAGCCCATGCAGGAAGATCAGTTGATATCTCTATTTTCTC…
RRSSC7820-15|Tricyphona	4830	1502	118	1840	477	1797	2115	2179	1711	116	2175	2322	526	2137	1019	166	349	1996	572	505	412	AACATTGTATTTTATATTCGGGATATGGGCAGGAATAATTGGATCATCTCTTAGATGAATTATTCGTATAGAATTAGGTCAAATAGGAACACTTATTGGAGATGATCAAATTTATAATGTAATTGTAACAGCCCACGCCTTTATTATAATTTTCTTTATAGTTATACCTATTATAATTGGGGGATTTGGCAATTGACTAATTCCTTTAATAATTGGAGCACCAGATATAGCATTTCCCCGACTTAATAATATAAGTTTTTGACTTCTACCCCCATCTCTTTCTTTATTATTTATAAGCAGACTTAGAGAATCAGGAGCAGGAACAGGATGAACAGTTTATCCACCTCTGTCAAATAGACTATTTCATAGAGGAGCTCCTGTAGACCTAGCAATTTTTTC…
RRMFE2992-15|Trichodezia	3553	3056	1273	2011	1348	2581	1196	1621	1885	305	646	897	1004	1390	1242	1236	1469	448	552	431	436	AATTTTATATTTTATTTTTGGAATATGAGCAGGTATAATTGGATCATCAATAAGAATAATTATTCGATTAGAATTAGGTAACCCTGGTTACTTTATTAATAATGACCAAATTTATAATTCTATAGTTACTTCCCATGCTTTTATTATAATTTTCTTTATAGTTATACCTATTATAATTGGAGGATTTGGTAATTGATTAATCCCCCTAATACTTGGGGCCCCTGATATAGCATTCCCACGAATAAATAATATAAGATTTTGACTTTTACCCCCATCCTTAACTTTATTAATTCTTAGTAATTTAATAAATCAAGGAGTTGGAACAGGCTGAACAGTTTACCCCCCCCTTTCCTTAAATATAAGTCATGAAGGAATAGCAGTTGATCATTCAATTTTTTC…
RRSSA4469-15|Platypalpus	3890	768	1689	2237	344	1736	2032	1733	1790	122	800	762	1949	1805	1253	252	436	371	1133	655	777	AATATTATATTTTATTTTTGGATTATGAAGAGGAATAATTGGATCCTCATTAAGAATAATTATTCGATTAGAATTAGGTATACCAGGAAAATTAATTGGTAATGATCAAATTTATAATACTATTGTTACCTCTCACGCTTTTATTATAATTTTTTTTATAGTAATACCATTCATAATTGGAGGATTTGGAAATTGATTAGTTCCTCTAATAATTTCAGCACCTGATATAGCATTTCCTCGAATAAATAATATAAGTTTTTGATTATTACCCCCATCTTTATTTTTACTATTATTAAGAAATTTTATTGGTAATGGTGTTGGAACAGGTTGAACTCTATATCCACCCCTATCTTCTATTACAGGTCATAATTCTCCTTCTGTAGATATTGGAATTTTTTC…
RRMFE2528-15|Panzeria	178	2084	5272	1035	2257	379	787	937	1045	56	2041	1476	1685	711	753	1043	1741	2331	263	403	249	GACCCTATATTTTATATTTGGTATTTGAGCTGGAATACTTGGAACATCCCTTAGATGACTAATTCGTATTGAACTAGGACACCCTGGATCTTTTATTGGGGACGATCAAATTTATAATGTAGTTGTTACTGCACATGCTTTTATTATAATCTTCTTTATGGTTATACCCATTATAATTGGAGGATTTGGTAACTGACTAGTGCCATTAATAATTGGGGCACCAGATATAGCATTCCCTCGTATAAATAATATAAGTTTCTGACTACTACCCCCTTCAATTACATTATTAATTGTAAGAAGAATTGTAGAAAAGGGTGTAGGAACAGGATGAACAGTTTATCCTCCTCTATCAGCTAACGTAGCCCATAATGGTGCATCAGTAGATCTAGCCATTTTCAG…
RRMFI4058-15|Maliattha	1782	2062	2194	2007	1242	632	1855	2061	2438	108	2969	451	992	1186	774	1181	2103	357	420	228	211	AACATTATATTTTATTTTTGGAGCATGAGCTGGAATAATTGGTACTTCATTAAGTATCTTAATTCGAGCTGAATTAGGACACCCTGGATCATTAATTGGGGATGACCAAATTTATAATGTAATTGTAACAGCACATGCTTTTGTAATAATTTTCTTTATAGTAATACCTATTATAATTGGAGGGTTTGGAAATTGATTAGTTCCTTTAATACTAGGAGCTCCTGATATAGCATTCCCTCGAATAAATAATATAAGTTTCTGATTATTACCACCATCATTAACTCTTTTATTAGCCAGTAGTATAGTAGAAAATGGAGCTGGAACTGGTTGAACAGTATACCCACCTCTATCTGCTGCAATTGCTCATGGAGGAGGATCAGTTGATTTAGCAATTTTTTC…
RRMPC926-15|Protocalliphora	2268	2681	19	50	1097	2041	1735	1528	2116	3	339	821	1719	1433	1290	1708	1337	705	904	13	610	AACATTATATTTTTTATTTGGAACTTGAGCAGGTATAGTAGGAACCTCTTTAAGTGTATTAATTCGTGCAGAACTTGGACATCCAGGTGCTTTAATTGGAGATGACCAAATTTATAATGTTATTGTAACTGCACATGCTTTTGTAATAATTTTTTTTATAGTAATACCAATTATAATTGGAGGATTTGGAAATTGATTAGTTCCTTTAATATTAGGAGCTCCTGATATAGCATTTCCTCGAATAAATAATATAAGTTTTTGATTATTACCTCCTTCTTTAACACTTTTATTAGTAAGAAGAATAGTTGAAAACGGAGCTGGAACAGGTTGAACAGTTTACCCTCCTCTTTCTGCTAGTATTGCACATGGAGGAGCTTCTGTTGATTTAGCTATTTTTTC…
RRMFG2651-15|Ctenophora	6053	2062	1	2429	692	621	1924	1690	1773	120	218	2027	1812	1181	1028	524	1231	1249	885	217	166	AATTCTTTATTTTATATTTGGTATTTGGTCAGGAATAATTGGAATAATAATAAGAATTATTATTCGAATTGAACTTGGTCAACCAGGATCACTAATTAATAATGATCAATTATATAATGTTATTGTAACGTCACATGCTTTTATTATAATTTTCTTTATAGTTATACCAATTATAATTGGAGGATTTGGTAATTGATTATTACCATTAATAATTGGGGCTCCAGATATAGCATTCCCTCGATTAAATAATATAAGATTCTGAATACTACCACCATCTTTAACGTTATTATTGTCAAGATCATTAATTGAAATAGGTGTAGGAACAGGTTGAACTGTCTACCCTCCATTATCTTCTAATATTGCACATTCAGGTCCTAGAGTAGATATATCTATTTTTTC…
RRSSA4405-15|Smilia	647	3417	357	424	4006	1087	1085	848	792	146	28	1476	296	2723	1088	2208	1937	489	121	348	279	AACATTATATTTCATCTTTGGAGCCTGAGCAGGTATAGTAGGAACTTCACTCAGTCTATTAATTCGAGCAGAACTTGGTCAACCAGGTTATCTAATTGGCGACGATCAAATTTATAATGTTATTGTCACTGCTCACGCATTCGTAATAATTTTCTTTATAGTTATACCTATTATAATTGGAGGATTCGGAAATTGACTTGTCCCTTTGATATTAGGGGCTCCAGATATAGCTTTCCCTCGAATAAATAATATAAGATTTTGATTATTACCCCCCTCATTAACCCTTCTTCTTAGAAGAAGTCTTGTGGAAAGTGGTGCTGGTACAGGATGAACGGTTTACCCTCCTCTTTCTTCAGGTATCGCTCATGCAGGTGCTTCAGTTGATCTGGCTATTTTTTC…
RRMFG2623-15|Blaesoxipha	471	1248	1950	1069	2808	806	883	693	628	1747	1193	1401	1617	1479	1231	1563	1307	18	847	246	164	AACTCTTTATTTTATTTTTGGAGCCTGAGCAGGCATAGTAGGAACTTCATTAAGAATCCTTGTGCGAGCAGAATTAGGTCACCCAGGGTCATTAATTGGAGATGATCAAATCTATAATGTAATTGTAACAGCTCATGCTTTTATTATAATTTTCTTTATAGTAATACCAATTATAATTGGAGGATTCGGAAATTGACTTGTACCTTTAATATTAGGTGCTCCTGATATAGCTTTCCCCCGAATAAATAATATAAGATTCTGAATATTACCTCCATCCCTTACTCTACTGTTAGCAAGTTCAATAGTTGAAAGTGGAGCAGGAACCGGATGAACTGTATATCCACCATTATCTTCAAGTATCGCCCATGGAGGTGCCTCAGTTGATCTAGCTATTTTCTC…
RRGCO618-15|Epirrhoe	8055	741	224	6780	1934	1866	564	880	1135	552	546	366	443	1164	670	800	1531	205	224	294	393	AACTTTATATTTTATTTTTGGAATTTGAGCTGGAATAGTAGGAACTTCATTAAGATTATTAATTCGAGCAGAATTAGGAAATCCTGGATCACTAATCGGAGATGACCAAATTTACAATACTATTGTAACAGCCCATGCATTTATCATAATTTTTTTTATAGTAATACCAATTATAATTGGGGGATTTGGAAATTGATTAGTACCTTTAATACTCGGGGCCCCTGATATAGCATTCCCACGAATAAATAATATAAGATTTTGACTTTTACCTCCTTCTATTACTCTTTTAATTTCTAGAAGAATCGTAGAAAATGGGGCTGGAACTGGATGAACAGTTTACCCACCTTTATCATCTAATATTGCTCATGGGGGTAGATCAGTAGATTTAGCTATTTTTTC…
RRGCO081-15|Adelphocoris	476	3006	3386	4430	2329	408	1168	918	656	855	1916	761	1171	1115	1123	5	1198	475	516	8	348	AACACTTTACTTTATTTTTGGGGCTTGAGCTGGAATAATTGGAACATCATTAAGTATTTTAATTCGTGCTGAATTAGGTCATCCAGGTGCTTTAATTGGTGATGATCAAATTTATAATGTAATTGTAACTGCTCATGCATTTGTTATAATTTTCTTTATAGTTATACCTATTATAATTGGGGGATTCGGAAATTGACTTGTTCCATTAATGTTAGGAGCTCCTGACATAGCATTCCCTCGAATAAATAATATAAGTTTTTGACTACTTCCTCCTTCATTAACACTTTTATTAGTTAGAAGTATAGTTGAAAATGGGGCTGGAACTGGTTGAACTGTATACCCACCATTATCTGCAGCTATTGCTCATGGAGGAGGATCAGTTGATTTAGCAATTTTTTC…
RRMFG2646-15|Mydaea	4009	706	28	609	2465	892	1298	1713	1855	42	3112	1008	61	1587	976	298	923	2814	371	155	147	AACTTTATATTTTATTTTTGGAGCTTGAGCTGGAATAGTGGGGACCTCCTTAAGAATTTTGATTCGAGCTGAATTAGGACATCCTGGAGCTTTAATTGGAAATGATCAAATTTATAACGTTATTGTAACAGCCCATGCTTTTATTATAATTTTTTTTATAGTTATACCTATTATAATTGGAGGATTTGGTAATTGACTTGTCCCTTTAATATTAGGAAGACCTGATATAGCTTTTCCTCGAATAAATAATATAAGTTTCTGAATACTACCCCCATCCTTAACCCTTTTATTAGCTAGAAGCATAGTTGAAAATGGAGCAGGGACAGGATGAACAGTATATCCCCCCCTATCTTCCGGAATTGCTCATGCTGGGGCTTCAGTAGACTTAGCTATTTTTTC…
RRSSC1828-15|Chloropidae	6988	2020	647	1356	1181	167	683	570	309	11	327	990	1112	1002	797	614	2235	2085	365	503	440	AACTTTATATTTTATCTTTGGGGCCTGAGCAGGTATAGTAGGAACTTCTTTAAGAATTCTTATTCGAGCTGAACTAGGTCATCCAGGAGCTTTAATTGGGGACGATCAAATTTATAACGTAATTGTTACAGCTCACGCTTTCATTATAATTTTTTTTATGGTTATACCCATCATAATTGGAGGATTTGGAAATTGACTAGTCCCTATTATACTAGGAGCCCCTGATATAGCATTTCCCCGAATAAACAATATAAGATTTTGATTGCTTCCCCCAGCATTAACTTTACTATTGGTAAGTAGTATAGTAGAAAATGGAGCTGGAACAGGTTGAACTGTTTACCCCCCCCTATCCTCTAACATTGCTCATGGAGGAGCCTCAGTAGATTTAGCAATTTTCTC…
RRGCO126-15|Cochylis	2035	810	3	1543	2167	1586	1335	1698	2092	146	1401	541	1099	849	560	1985	1761	157	493	228	231	AACATTATATTTTATTTTTGGAATTTGAGCAGGAATAGTTGGAACTTCTCTAAGATTATTAATTCGAGCTGAATTAGGTAACCCAGGATCATTAATTGGAGATGATCAAATTTATAATACTATTGTTACAGCTCATGCTTTTATTATAATTTTTTTTATAGTTATACCTATTATAATTGGAGGATTTGGAAATTGATTAGTACCTTTAATATTAGGAGCACCAGATATAGCTTTTCCACGAATAAATAATATAAGTTTTTGATTATTACCCCCCTCCCTTACTCTTTTAATTTCAAGAAGAATTGTAGAAAATGGAGCAGGAACAGGATGAACAGTTTACCCCCCACTTTCATCTAATATTGCTCATGGAGGTAGATCAGTAGATTTAGCAATTTTTTC…
RRSSC243-15|Euodynerus	10385	4182	1983	2876	1183	307	1084	1140	430	0	4	404	540	825	629	186	824	1238	561	333	348	AACATTATATTTTATTTTTGGAACTTGATCAGGGATAGTGGGAACTTCATTAAGAATCTTAATTCGAGCAGAATTAGGAAATCCCGGTTCTTTAATTGGAGATGATCAAATCTACAATGTAATTGTAACTGCTCATGCTTTTATTATAATTTTTTTTATAGTTATACCTATAATAATTGGGGGATTTGGTAATTGACTAGTACCTCTTATATTAGGAGCACCAGATATAGCTTTTCCACGCCTTAATAATATAAGATTCTGACTACTCCCTCCTTCTCTATCATTCCTATTAATAAGAAGAATTGTAGATAAAGGGGCCGGCACAGGTTGGACTGTATATCCCCCCCTATCAGCCAATATTGCCCATGAAGGCTCTTCAGTAGATTTAGCTATCTTCAG…
RRGCO234-15|Dyspteris	3515	4682	12	775	496	1717	2496	2537	2458	106	429	1342	1392	963	1033	1194	841	0	19	96	69	AACATTATACTTTATTTTTGGAATTTGAGCAGGTATAGTAGGAACTTCATTAAGATTACTAATTCGAGCTGAATTAGGAAATCCTGGTTCTTTAATTGGAGACGATCAAATTTACAATACTATCGTAACAGCTCATGCTTTTATTATAATTTTTTTTATAGTTATACCCATTATAATTGGGGGATTTGGAAATTGATTAGTTCCTTTAATATTAGGAGCTCCTGATATAGCATTTCCTCGAATAAATAATATAAGATTTTGACTTTTACCTCCTTCTCTAACTCTTTTAATTTCAAGAAGAATTGTAGAAAATGGAGCAGGAACTGGATGAACTGTTTACCCTCCTTTATCTTCTAATATTGCTCATGGAGGAAGTTCAGTAGATTTAGCAATTTTCTC…
RRSSC7832-15|Epiphragma	3591	2065	34	3862	18	1341	1135	1072	1587	80	483	1319	1977	1027	586	210	273	48	1185	628	521	AACTTTGTATTTTATTTTAGGAGCTTGGGCAGGAATAGTAGGAACTTCTTTAAGAATTTTAATTCGAGCAGAACTTGGTCATCCGGGGGCCTTAATTGGGGATGACCAAATTTATAATGTTATTGTAACAGCTCATGCATTTGTAATAATTTTTTTTATAGTAATACCTATTATAATTGGAGGATTTGGAAATTGATTAGTTCCTTTAATATTAGGGGCTCCTGATATAGCCTTTCCTCGAATAAATAATATAAGTTTTTGATTATTACCACCTTCTCTTACACTTTTATTAGCAAGTAGTATAGTTGAAAATGGAGCAGGGACTGGTTGAACAGTATACCCCCCCCTTTCTGCTGGAATTGCCCATACTGGAGCATCAGTTGATTTAGCAATTTTTTC…
RRSSC3243-15|Neottiglossa	1700	1107	2236	573	159	1829	1538	1226	1648	282	1249	845	1596	1011	1175	1424	1438	482	589	167	172	TACTTTATATTTTATTTTCGGAGCATGATCAGGAATAGTAGGTACCTCTTTAAGAATATTAGTTCGAGCAGAATTAGGGCATCCTGGAGCATTAATCGGTGATGATCAAATTTATAATGTAATTGTAACAGCCCATGCCTTTGTTATAATTTTTTTTATAGTTATACCTATTATAATTGGAGGATTTGGAAATTGACTTGTTCCTTTAATATTAGGAGCACCTGATATAGCATTCCCTCGAATGAATAATATAAGTTTTTGACTCTTACCTCCTGCACTTACATTATTATTGGTGAGCAGTATAGTGGAAAACGGAGCTGGGACAGGATGAACTGTTTACCCACCTCTATCTTCTAATATTGCTCATGGAGGGGCTTCTGTTGATTTAGCTATTTTTTC…
RRGCO774-15|Pycnopsyche	0	846	1614	1655	2488	1334	390	362	264	1897	9	1445	916	1309	923	1793	1759	413	43	124	617	TACATTATATTTTATTTTTGGAATTTGAGCAGGTATAGTAGGAACATCATTAAGATTACTAATTCGAGCTGAATTAGGAAATCCAGGATCATTAATTGGAGATGATCAAATTTATAATACTATTGTTACAGCTCATGCTTTTATTATAATTTTTTTTATAGTTATACCTATTATAATCGGAGGATTTGGAAATTGATTAGTTCCTTTAATATTAGGAGCACCTGATATAGCTTTCCCACGTATAAATAATATAAGATTTTGACTTCTTCCACCCTCTATTATATTATTAATTTCAAGAAGAATCGTAGAAAATGGAGCAGGTACAGGATGAACAGTATACCCCCCACTTTCATCTAATATCGCTCATAGAGGAAGATCAGTAGATTTAGCTATTTTTTC…
RRSSA2341-15|Chlaenius	11280	2086	10	1745	449	1766	1199	1034	1963	198	4067	350	537	897	864	166	420	554	273	146	47	AACCTTATATTTTATTTTTGGAATTTGAGCAGGATTAGTAGGAACCTCTCTCAGTCTATTAATTCGAGCAGAATTAGGTAATCCAGGATCTTTAATTGGAGATGATCAAATTTATAATACTATTGTAACAGCTCATGCTTTCATTATAATTTTTTTTATAGTTATACCAATTATAATTGGAGGATTTGGTAATTGATTAATTCCTTTAATATTAGGAGCCCCCGATATAGCTTTCCCCCGAATAAATAACATAAGATTCTGACTACTTCCCCCCTCTATTATACTGTTAATTTCAAGAACAATCGTCGAAAATGGAGCTGGAACTGGTTGAACTGTATACCCTCCTTTATCATCTAATATTGCACACAGAGGAACTTCAGTTGATTTAACTATTTTTTC…
RRMPE019-15|Macrophya	1398	2825	28	3	772	395	2288	1889	1919	1	65	912	0	1066	905	99	457	4995	1970	11	7	GACTCTATATTTTATTTTTGGTGCATGAGCTGGAATAGTAGGAACTTCATTAAGTCTACTAATTCGGTCAGAACTAGGTACACCTGGAACATTAATTGGTAATGACCAAATTTATAATGTTATTGTTACTGCTCATGCTTTTATCATAATTTTCTTTATAGTTATACCAATTATAATTGGGGGATTTGGAAATTGATTAGTACCCTTAATATTAGGAGCACCCGATATAGCATTTCCACGAATAAATAATATAAGATTTTGACTTTTACCCCCGTCTCTATCTTTACTTTTAATAAGAAGGATAGTAGAAAGAGGAGCAGGAACAGGGTGGACTGTTTATCCCCCTTTATCTTCAAATATTGCCCATGGGGGTTCTTCTGTTGATTTGGCAATTTTTAG…
RRSSC1988-15|Toxomerus	3358	2774	337	95	167	1193	1608	1591	2133	93	4368	1533	368	733	722	169	308	2147	779	112	61	AACCCTTTACTTCCTTTTTGGAGCCTGAGCAGGAATGCTTGGAACTTCATTAAGACTACTAATCCGAGCAGAACTAGGAAACCCTGGATCTCTAATTGGAAATGATCAAATTTACAATGTTATTGTCACAGCTCATGCTTTCATTATAATTTTCTTTATAGTAATGCCTATTATAATTGGAGGATTCGGAAACTGACTAGTCCCCCTTATACTAGGAGCACCAGATATAGCCTTCCCTCGAATAAACAACATAAGATTCTGGTTCTTACCACCATCACTATCACTTCTTCTAATAAGAAGAATCGTAGAAAACGGAGCAGGAACTGGATGAACCGTCTACCCACCCTTATCAGCCAATATTGCCCATAGAGGATCATCTGTCGATCTAGCTATTTTCAG…
RRMFC2068-15|Suillia	182	2309	12	6470	231	1151	955	1317	1393	6185	432	548	369	609	548	196	208	50	222	171	312	AACGTTGTATTTTTTATTTGGAATCTGAGCCGGTATATTAGGAACATCTTTAAGATTATTAATTCGTGCTGAATTAGGAAATCCTGGTTCATTAATTGGAGATGACCAAATTTATAACACAATTGTAACTGCCCATGCTTTTATTATAATTTTTTTTATAGTTATACCAATTGTTATTGGGGGATTTGGTAATTGATTAATTCCTTTAATGTTAGGAGCCCCTGATATAGCTTTCCCTCGAATAAATAACATAAGATTCTGATTACTACCCCCTTCATTAACTCTTTTAATTTCAAGAAGAATTGTTGAAAATGGAGCAGGAACTGGATGAACAGTTTACCCCCCACTTTCATCTAATATTGCCCATAGAGGAAGATCAGTCGATTTAGCTATTTTTTC…
RRMFE3090-15|Bombylius	549	2876	6	899	5976	545	1028	1097	386	301	685	1454	1032	1452	1374	1	1855	435	293	0	197	AACTCTGTACTTTATCTTTGGCGCATGGGCAGGTATACTAGGTACATCCCTAAGACTTTTAATTCGTGCCGAACTAGGAAATCCAGGATCTCTAATTGGTAACGATCAAATTTACAACGTTATTGTTACTGCACACGCATTCATTATAATTTTCTTCATAGTTATACCAATCATAATCGGAGGATTTGGAAATTGATTAGTCCCATTAATGCTAGGAGCCCCAGACATAGCTTTCCCCCGAATAAACAACATAAGATTCTGACTCTTACCACCCTCATTAAGACTTCTACTAATAAGAAGAATTGTAGAAAATGGAGCAGGAACAGGATGAACTGTTTACCCACCACTATCATCCAATATTGCTCATAGAGGTTCCTCAGTAGACCTTGCTATTTTTAG…
RRMFI4245-15|Diplazon	101	1015	526	657	243	819	1129	993	1389	1663	4581	362	1141	972	880	719	1534	1105	418	181	180	AACTTTATATTTTATTTTTGGTGCCTGATCCGGAATAGTGGGAACTTCTTTAAGAATACTTATTCGAGCCGAATTAGGAAATCCAGGTTCTTTAATTGGAGACGACCAAATTTATAACGTAATTGTAACTGCTCATGCATTTATTATAATTTTCTTTATAGTAATACCAATTATAATCGGAGGATTCGGAAATTGATTAGTCCCTCTTATATTAGGAGCACCTGATATAGCATTTCCACGATTAAATAATATAAGATTTTGATTATTGCCTCCTTCTTTGTCCCTCCTTTTAATAAGAAGAATTGTTGACAAAGGAGCTGGAACTGGTTGAACTGTTTATCCCCCCTTATCGGCCAATATTGCACATGAAGGATCTTCAGTAGATTTAGCAATTTTTAG…
RRSSC5038-15|Actina	1969	1189	2043	1287	1152	542	1178	1023	1463	106	904	824	1459	696	645	1473	803	249	692	390	498	AACTCTTTACTTTGTATTTGGGGCTTGAGCTAGGATAGTCGGAACATCTTTAAGGCTTTTAATTCGATCAGAATTAGGAAACCCTGGTTCATTAATTGGTGATGATCAAATTTATAATGTAATTGTGACTGCTCATGCATTTGTCATAATTTTCTTCATAGTTATACCCATTATAATCGGCGGATTTGGCAATTGACTAGTACCTTTAATATTGGGGGCACCTGATATAGCTTTCCCTCGAATAAATAACATAAGATTTTGATTGCTGCCACCTTCACTAACTTTGCTGATTATGAGAAGAGTTGTAGAAAGAGGGGCAGGAACAGGGTGAACTGTCTACCCCCCCCTTTCATCTAATATTGCCCACGGAGGATCTTCTGTTGATCTGGCAATCTTCAG…
RRSSA2295-15|Glischrochilus	0	5097	615	21	215	626	4132	3462	4157	49	580	922	112	1269	1028	92	188	301	300	11	275	TACTTTATATTTTATCTTTGGAGCTTGAGCAGGAATATTGGGAACTTCTTTAAGAATACTAATTCGAGCAGAATTAGGACATCCAGGATCTTTATTAGGTAATGATCAAATTTATAATGTAATTGTAACTGCACATGCTTTCATTATAATTTTTTTTATAGTAATACCTATTATAATTGGAGGATTCGGAAATTGATTGGTTCCTTTAATATTAGGAGCTCCTGATATAGCTTTTCCTCGAATAAATAATATAAGATTTTGAATACTGCCACCTTCATTAACTTTATTATTAATAAGAAGAATAGTTGAAAATGGAGCAGGAACAGGATGAACTGTTTACCCTCCCTTATCAAGAACTTTATCTCATAGAGGAGGATCTGTTGATTTAGCAATTTTTTC…
RRMFE2990-15|Euplexia	2578	2017	4082	451	73	162	1024	969	987	194	340	1400	327	713	638	115	275	1983	981	547	569	TACTTTATATTTTATTTTCGGAGCTTGATCTGGAATAATTGGAACTTCATTAAGAATTCTAATTCGAGCTGAACTAGGGCACCCTGGAGCTCTAATTGGAGATGACCAAATTTATAACGTAATTGTAACAGCTCATGCTTTTATTATAATTTTCTTTATAGTTATACCAATTATAATTGGAGGATTTGGAAATTGATTAGTTCCTTTAATATTAGGGGCTCCTGATATAGCTTTCCCACGAATAAACAATATAAGTTTTTGACTTTTACCTCCTGCATTAACTCTATTGTTAGTTAGTAGTATAGTAGAAAATGGGGCTGGAACAGGATGAACTGTTTACCCACCTTTATCATCTAATATTGCTCATGGAGGAGCATCTGTTGATCTAGCTATTTTCTC…
RRSSA3893-15|Myzia	2062	1210	3956	63	125	1185	839	1023	439	158	7170	26	365	978	635	53	174	160	739	408	299	AACTCTATATTTTATGTTCGGAGCATGAGCCCGAATAGTAGGAACTTCTTTGAGAATTCTTGTTCGAGCCGAATTAGGACATCCTGGGGCATTGATTGGAGATGATCAAATTTATAACGTAATTGTTACTGCCCATGCATTTGTAATAATTTTTTTTATGGTTATACCTATTATAATTGGAGGATTTGGTAACTGATTGGTTCCTTTAATGCTTGGAGCCCCAGATATGGCATTTCCACGAATAAATAATATAAGATTTTGACTACTACCTCCTTCATTAACACTATTACTAGTAAGTAGAATAGTGGAAAACGGAGCTGGGACAGGTTGAACGGTATACCCCCCTCTTTCATCTGTAATTGCACATGGAGGAGCATCTGTAGATTTAGTAATTTTTTC…
RRGCO351-15|Fumibotys	1927	737	1076	481	953	745	1226	1242	1501	119	435	1133	1053	956	964	1034	1255	1378	563	290	299	AACTATTTATTTTATTTTTGGTATCTGAGCTGGAATAGTTGGTACTTCTCTAAGTATAATTATTCGAACTGAACTTGGAACTACTGAATCATTAATTAAAAACGATCAAATTTATAATGTTTTAGTTACTGCTCATGCTTTTATTATAATTTTCTTCATAGTTATACCCATCATAATTGGGGGATTTGGAAATTGACTTGTTCCCTTAATAATCGGAGCCCCTGATATAGCCTTCCCTCGAATAAATAATATAAGTTTTTGACTTCTTCCCCCTTCTCTAAATTTTCTATTAATTAGCTCAATTGTTGAGAATGGAACTGGAACAGGATGAACTGTCTATCCCCCCCTTTCAAGTAATATTGCTCATGCTGGAAGATCAGTTGATATCTCTATTTTCTC…
RRGCO298-15|Microcrambus	1588	1051	34	870	347	2121	2417	1823	2442	24	1247	111	1954	1128	821	531	1673	307	596	85	21	AATATTATATTTCTTATTTGCTATATGAGCAGGAATAATTGGAACATCAATAAGAATAATTATTCGAATAGAATTAAGAACACCAGGTATATGAATTAATAATGACCAAATTTATAATACAATAATTACCGCCCACGCATTTATTATAATTTTTTTTATAGTTATACCTTTCATAATTGGAGGATTTGGTAATTGACTAATCCCTATTATAATTGGAGCTCCCGATATAGCTTTCCCACGAATAAACAATATAAGATTTTGATTATTACCTCCCTCACTAACATTACTCTTAATAAGAAGTGTAGCTTACTCAGGATCAGGAACAGGTTGAACAGTTTACCCACCTTTATCATCTATCTTATACCATCCATCATTATCAGTAGATTTTACAATTTTTTC…
RRGCO725-15|Agriphila	719	2267	2808	392	610	1803	1918	1570	2377	68	617	663	1116	614	525	1019	1047	376	504	177	137	AATATTATATATTATTTTTGCTTTATGATCAGGAATAATTGGAACTTCTATGAGATTTATTATTCGTATAGAATTAAGTAATCCTGGTGAATGAATTATAAATGATCAAATTTATAATTCTTTAGTAACAGCTCATGCTTTTTTAATAATTTTTTTTATAGTAATACCTTTTATAATTGGGGGATTTGGTAATTGATTAGTTCCTTTAATATTAGGATGTCCTGATATAGCTTTCCCTCGTATAAACAATATTAGATTTTGATTATTACCCCCATCTTTAATTTTATTATTATTAAGAAATTTATTTAATATTACTCCAGGAACAGGATGAACAGTTTATCCTCCATTATCTTCATCAATATTTCATAGATCTCCTTCAGTTGATTTAGCAATTTTTTC…
RRMFI4018-15|Metalimnobia	2974	1009	2586	1744	351	1067	763	683	1025	3083	1711	283	789	364	304	682	610	189	280	482	216	GACTTTATATTTTATCTTCGGAACTTGATCTGGAATAATTGGGACCTCTCTAAGACTCTTGATTCGATCAGAATTAGGAAACCCCGGGTCACTAATTGGAGATGACCAAATTTATAATGTTATTGTTACTGCTCATGCTTTTATTATAATTTTTTTTATAGTTATACCTTTTATAATTGGAGGTTTTGGAAACTGACTAATACCATTAATACTAGGAGCCCCTGATATAGCATTCCCTCGATTAAATAATATAAGATTTTGACTTCTCCCCCCGTCAATTTCTTTATTATTAATAAGAAGAATTGTTGAAAGTGGAGCCGGTACTGGGTGAACAGTTTATCCCCCCCTATCTTCTAATATTGCCCACGGTGGGTCATCTGTAGATTTAGCTATTTTTAG…
RRSSC4840-15|Cantharis	2302	4059	4248	1888	314	518	1557	1363	1049	10	32	328	565	797	818	990	1003	209	31	200	268	AACTTTATATTTTTTATTTGGTATATGGGCAGGAATGGTTGGAACATCATTAAGAATCTTAATTCGGCTAGAATTAGGAACAACAAATAGATTAATTGGAAACGACCAAATTTATAATGTAATTGTAACAGCTCATGCTTTTATTATAATTTTTTTTATAGTTATACCAATTATAATTGGAGGGTTTGGAAATTGATTAGTGCCATTAATGATTGGGGCACCTGATATAGCTTTCCCTCGTTTAAATAATATAAGATTCTGACTTCTACCTCCTGCTCTAACTTTACTAATTTTTAGTAGATTAGTTGAAATAGGAGCAGGTACAGGATGAACAGTATACCCCCCTCTATCAGCTAATATAGCTCATAGAGGATCATCTGTCGACTTAGTAATTTTTAG…
RRSSC3245-15|Eurosta	6758	3402	0	2043	383	530	940	1059	1246	3	48	1151	479	776	439	247	351	121	820	279	702	AACTTTATATTTTATTTTTGGAATTTGATCAGGAATAGTGGGAACTTCTTTAAGAATATTGATTCGAGTTGAATTAGGAAACCCAGGATCTTTAATCGGAAATGATCAAATTTATAATACAATTGTTACAGCCCATGCTTTTATTATAATTTTTTTTATAGTTATACCAATTATAATTGGAGGTTTTGGAAATTGATTGGTTCCTTTAATGTTAGGAGCTCCTGATATAGCTTTTCCTCGTCTTAACAACATAAGATTCTGACTTTTACCACCTTCTTTAATTCTTTTAATTTCAAGAAGAATCGTAGAAAACGGAGCTGGAACTGGATGAACAGTTTATCCACCTCTTTCTTCTAATATTGCCCATAGAGGAAGATCTGTTGACTTAGCTATTTTTTC…
RRMFI4208-15|Parancistrocerus	0	427	1878	923	5679	78	471	510	439	5	0	460	278	690	616	949	1738	892	465	210	327	AACCTTATATTTTATATTTGGTATATGAGCAGGAATAATAGGATCAGCAATAAGTTTAATTATTCGTATTGAATTAGGGCAACCTGGTAGATTTATTGGAGATGATCAAATTTATAATGTAATAGTAACAGCACATGCCTTTATTATAATTTTTTTTATAGTAATACCAGTTATAATTGGAGGATTTGGTAATTGATTAGTACCTTTAATAATTGGAGCCCCTGATATAGCATTCCCACGAATAAATAATATAAGATTCTGATTATTACCACCATCCTTAACCTTATTAATAATAAGAAGATTAACAGAAGCTGGGGCTGGAACAGGTTGAACTGTTTACCCTCCTTTATCTAGAAATTTATCACATAGAGGACCATCTGTAGATTTAGCAATCTTTTC…
RRMPC919-15|Polistes	2164	740	3226	2064	3038	236	206	243	224	5	0	601	675	1184	885	988	1162	236	323	194	332	AACATTATATTTCATTTTTGGTGCCTGAGCAGGAATAATCGGAACATCTTTAAGAATTTTAGTTCGAGCAGAATTAGGTCATCCTGGTGCACTAATTGGAGATGATCAAATTTATAATGTAATCGTCACAGCCCATGCATTTGTAATAATTTTTTTCATAGTCATACCAATTATAATTGGAGGATTTGGAAATTGATTAGTACCACTAATATTAGGAGCTCCTGATATAGCTTTTCCTCGAATAAATAATATAAGTTTTTGATTATTACCTCCTGCATTAACTTTACTACTCGTAAGTAGTATAGTAGAAAATGGAGCTGGAACAGGATGAACTGTTTATCCTCCTTTATCATCTAATATTGCTCACGGAGGTGCTTCTGTTGATTTAGCAATTTTTTC…
RRMFB1069-15|Cyrtophleba	1071	449	548	503	332	154	791	912	639	34	5413	682	1141	545	421	917	1466	367	517	222	179	TACTTTATATTTTATTTTTGGAGCTTGAGCAGGAATAGTAGGAACTTCTTTAAGTATCCTAATTCGAGCAGAATTAGGGCACCCCGGTGCTTTAATCGGAAATGACCAAATTTATAATGTTATTGTAACAGCTCATGCTTTTATTATAATTTTTTTTATAGTAATGCCTATTATAATTGGGGGGTTTGGAAATTGATTAGTTCCACTAATATTAGGAGCTCCTGATATAGCTTTCCCACGAATAAATAATATAAGTTTTTGACTTTTACCTCCCGCATTAACTTTATTATTAGTAAGTAGTATAGTAGAAAACGGGGCTGGAACAGGATGAACTGTTTATCCTCCTTTATCTTCAAATATTGCTCACGGAGGGGCTTCGGTTGATTTAGCTATTTTTTC…
RRMFI4046-15|Phyciodes	2487	2023	52	1352	198	1444	1583	1511	1851	145	342	12	1043	1739	1205	36	1801	380	529	5	0	AACTCTATATTTTCTGCTAGGTGCTTGAGCAGGGGTTGTTGGAACCTCCTTAAGATGAATAATTCGAATTGAATTAGGTACTCCAGGTACTTTTATTGGAAATGATCAAATTTATAATGTATTTGTTACTGCACACGCATTTATTATGATTTTCTTTATAGTTATGCCTATTATAATTGGAGGATTTGGGAATTGATTAGTACCCCTTATAATTGGAGCTCCTGATATAGCCTTCCCCCGAATAAATAATATAAGATTTTGACTTCTTCCCCCTTCCCTAACCTTGTTATTAATTAGAAGAATTGCTGAAGGAGGGGCAGGAACAGGATGGACCGTTTATCCCCCCTTATCTAGTAATATGGCCCATAGAGGTGCAGCAGTAGATTTAGCAATTTTCTC…
RRGCO249-15|Scopula	9395	2577	10	717	436	1896	693	892	1195	71	704	586	153	936	539	110	500	1072	427	149	81	AACATTATATTTTATTTTTGGAATTTGAGCAGGAATAGTAGGAACATCTTTAAGATTACTCATTCGTGCTGAATTAGGAAATCATGGATTTCTAATTGGAGATGATCAAATCTACAATACTATTGTTACAGCTCATGCATTTATTATAATTTTTTTTATAGTTATGCCAATTATAATTGGAGGTTTCGGAAATTGATTAGTACCTTTAATACTTGGTGCCCCAGACATAGCTTTCCCACGAATAAATAACATAAGATTTTGACTATTACCCCCCTCTTTAACTTTACTAATTTCTAGAAGAATTGTAGAAAATGGAGCTGGAACAGGATGAACAGTGTACCCCCCACTTTCATCTAATATTGCTCATAGTGGAAGATCTGTTGATTTAACTATTTTTTC…
RRSSC5002-15|Agapostemon	0	3456	483	547	616	2123	1908	1752	2391	10	70	591	407	1201	1036	707	1061	91	267	43	21	AACCCTTTATTTTATTTTCGGTGCTTGAGCTGGAATAGTGGGAACTTCTTTGAGAATTTTAATTCGAGCCGAACTAGGACACCCTGGGGCTTTAATTGGAGATGATCAAATCTATAATGTTATTGTAACTGCTCACGCATTTGTAATAATTTTTTTTATAGTAATACCTATTATAATTGGGGGATTTGGAAATTGACTGGTGCCTTTAATACTAGGAGCACCTGATATAGCTTTCCCTCGAATAAATAATATAAGATTTTGACTCTTACCACCTTCATTAACCCTATTATTAGTCAGTAGTATAGTAGAAAATGGAGCTGGTACAGGCTGAACTGTCTACCCACCGCTCTCTTCCGGAATTGCCCATGGAGGTGCCTCAGTAGACTTAGCTATTTTTAG…
RRMFI4040-15|Sehirus	5	2190	228	1223	760	1109	1764	1816	1636	12	1544	1094	732	985	1067	172	491	735	347	52	30	TACTTTATATTTTATTTTTGGTGCTTGAGCTGGAATAATTGGTACTTCTTTAAGAATTCTTATTCGAGCTGAATTAGGGCATCCAGGAGCTTTAATTGGCGACGATCAAATTTATAATGTAATTGTAACTGCTCATGCATTTATTATAATTTTTTTTATAGTTATACCAATTATAATTGGAGGATTTGGTAACTGATTAGTCCCTTTAATATTAGGAGCCCCAGATATAGCTTTCCCACGAATAAATAATATAAGATTTTGAATATTACCCCCTTCATTAACTTTATTATTAGCTAGAAGAATAGTTGATAATGGGGCTGGAACTGGTTGAACAGTATACCCCCCTCTATCTTCTGGAATTGCTCATAGAGGAGCTTCTGTAGATTTAGCTATTTTTTC…
RRGCO251-15|Drepana	1484	1578	3082	516	725	2458	918	950	1740	109	160	332	493	560	406	242	1116	782	303	249	143	AACATTATACTTTATTTTTGGAATTTGAGCTGGAATAGTTGGAACTTCATTAAGATTGCTAATTCGAGCTGAATTAGGAAACCCCGGATCTTTAATTGGAGATGATCAAATTTATAATACTATTGTTACAGCACATGCTTTTATTATAATTTTTTTTATAGTTATACCTATTATAATTGGAGGATTTGGTAATTGACTTGTCCCATTAATATTAGGAGCCCCTGATATAGCATTCCCCCGGATAAATAATATAAGTTTTTGACTTTTACCACCCTCTTTAACCTTATTAATTTCAAGAAGAATTGTAGAAAATGGAGCAGGAACAGGATGAACAGTATACCCACCACTTTCATCCAATATTGCTCATGGAGGAAGATCTGTTGATTTAGCTATTTTCTC…
RRGCO202-15|Tricholita	4332	2032	3650	552	97	518	1222	1099	1655	75	2105	415	386	383	383	105	161	975	359	90	125	AACTATTTATTTTATCTTCGGAATTTGAGCAGGAATAATTGGAACTTCTCTTAGAATAATTATTCGAACTGAATTAGGAACTACTGACTCATTAATTAAAAATGATCAAATCTATAACGTATTAGTAACTGCCCATGCTTTTATTATAATTTTCTTTATAGTAATACCTATTATAATTGGAGGATTTGGAAATTGACTTATCCCCCTAATAATCGGAGCCCCAGATATAGCTTTCCCCCGAATAAATAATATAAGATTTTGATTACTTCCCCCCTCTCTTAATCTTTTATTAATTAGAGCTTTAATTGAAAGAGGAACAGGAACAGGATGAACTGTTTACCCCCCTCTTTCAAGAAATTTAGCCCATGCAGGAAGATCCGTTGATATTTCAATTTTTTC…
RRSSA2279-15|Xylotrechus	2479	1453	0	567	356	848	3004	2104	2896	47	470	866	8	1264	857	115	217	1	522	147	122	AACTCTTTATTTCATTTTCGGGGCTTGAGCTGGAATAGTAGGGACTTCTTTAAGATTACTAATTCGAGCAGAATTAGGAAATCCTGGAAGATTAATTGGTGATGACCAAATCTATAATGTAATTGTCACTGCTCATGCTTTTATTATAATTTTCTTTATGGTTATACCTGTAGTTATTGGAGGTTTCGGAAATTGATTGGTTCCTTTAATACTAGGAGCCCCTGATATAGCCTTCCCTCGAATAAACAATATGAGATTTTGACTACTTCCCCCTTCTTTAACACTTCTTTTAATAAGAAGAATAGTAGAAAGAGGAGCTGGGACAGGATGAACTGTTTATCCTCCCCTATCATCTAATATTGCTCATGGTGGAGCTTCAGTAGATTTAGCAATTTTTAG…
RRMFI4075-15|Pollenia	1940	1647	5411	199	601	376	314	293	86	300	196	857	41	987	661	164	309	387	1062	490	265	AATACTATATTTTATTTTTGCTATGTGATCAGGAATGTTAGGGACTTCATTAAGAATATTAATTCGTCTTGAATTGGGAACCCCTAGCCAGATAATTAAAGATGACCAAATTTATAATTCTATTGTCACAGCCCATGCATTTATTATAATTTTCTTTATAGTTATACCATTCATAATTGGAGGATTTGGAAATTGATTAATCCCTCTAATAATTGGAGCCCCCGACATAGCTTACCCCCGAATAAACAACATAAGATTTTGGTTGCTCCCCCCCTCAATTTCTTTACTTTTATCAAGAAATTTTATTTCAAGTGGAGTTGGGACTGGCTGAACAGTCTACCCTCCCTTATCCTCAAACTTGATCCATAACAGCCCCGCCGTTGACTTCTCAATTTTTTC…
RRGCO430-15|Acleris	621	1666	1358	686	757	316	897	1227	1062	24	1380	706	853	568	663	887	994	239	439	207	240	AACATTATATTTTATTTTTGGAATTTGAGCAGGAATAGTAGGAACATCCCTAAGATTACTAATTCGTGCTGAATTAGGAACCCCCGGATCTTTAATTGGCGATGATCAAATTTATAATACTATTGTTACAGCTCATGCATTTATTATAATTTTTTTTATAGTAATACCAATTATAATTGGTGGATTTGGAAATTGATTAGTTCCATTAATACTAGGAGCACCTGATATAGCATTCCCACGAATAAATAATATAAGATTTTGATTATTGCCTCCCTCTTTAACCTTATTAATTTCTAGAAGAATTGTAGAAAATGGAGCTGGAACAGGATGAACAGTATACCCCCCCCTTTCATCTAATATTGCCCATAGAGGAAGATCTGTAGACTTAGCTATTTTTTC…
RRSSC4120-15|Nematus	0	3405	18	11	769	1722	768	924	746	0	86	823	281	1763	1386	848	1760	233	261	6	4	AACTTTATATTTTATTTTTGGTGCATGATCAAGAATAATAGGAACTTCATTAAGAATCTTAATTCGTACTGAATTAAGAAATCCTGGAAGATTAATCGGAAATGATCAAATTTATAATGTAATTGTAACAGCCCATGCATTCATTATAATTTTTTTTATAGTTATACCAATTATAATTGGTGGTTTTGGTAATTGACTTGTCCCTCTTATACTAGGAGCACCAGATATAGCTTTCCCCCGATTAAATAATATGAGATTCTGATTACTTCCGCCTTCTTTAATCTTTTTAACAATAAGAAGAATTACAGAAAGAGGAGCTGGAACCGGTTGAACAGTTTATCCTCCTTTATCAAGAAATATTGCCCATAGTGGAACTTCTGTTGATTTAGCTATTTTTAG…
RRSSA2263-15|Cymatodera	6839	942	0	113	1003	332	510	516	687	0	566	1164	897	852	743	428	738	1117	531	40	243	AACATTATATTTTATATTCGGAATATGATCAGGAATAATTGGAATAATATTAAGAATGATTATCCGAGTTGAATTAGGGCAACCTGGACCATTCATTAATAATGATCAAATTTACAATACAATTATTACATCACATGCATTCATTATAATTTTCTTTATAGTAATACCTATTATAATTGGAGGATTTGGTAACTGATTACTACCAATTATAATTGGGGCACCAGACATGGCATTCCCACGAATAAATAATATAAGATTCTGACTCTTACCACCATCAATTAAACTACTATTAATTAGATCATTAGTTGAATCAGGAGTAGGAACAGGATGAACAGTATACCCCCCACTTTCTAGAAATATTGGGCATTCAGGACCAAATGTTGAATTTGCAATTTTTTC…
RRSSA219-15|Delia	320	1264	5	597	72	1166	884	1003	684	19	701	320	2653	1171	775	177	295	39	746	347	231	AACTATATATTTTATTTTTGGTATTTGATCTGGTATAATTGGGACTACTTTGAGATTATTAATTCGTATTGAATTAGGTAATCCAGGGTCATTTATTGGTGATGATCAAATTTATAATGTAGTTGTTACAGCTCACGCATTTATTATAATTTTTTTTATGGTTATACCAATTATAATTGGAGGGTTTGGAAATTGACTTGTTCCCCTAATAATTGGTGCACCTGATATAGCTTTTCCTCGTATAAATAATATAAGATTTTGAATATTACCCCCTTCTTTAACTCTTTTATTAGTAAGAAGAATAGTTGATAATGGTGTAGGAACTGGTTGAACAGTTTACCCTCCTTTATCAAGTGGTTTAGCTCATGCAGGTTCTTGCGTCGATTTAGCAATTTTTTC…
RRMFD013-15|Xylophagus	635	2504	237	633	506	544	1510	1148	1883	136	109	713	1409	451	371	193	206	204	685	333	290	AATTTTATATTTTTTAATCAGAATTTGATCAGGTATGTTAGGAGCATCATTAAGAATAATTATTCGAATTGAATTAGGAATTCCTGGGTCTTTAATTGGGAATGATCAGATTTATAATTCAATTGTTACGGCCCATGCATTTATTATAATTTTTTTTATGGTTATACCTTTTATAATTGGAGGATTTGGTAATTGATTAATTCCTTTAATAATTGGGGCCCCTGATATAGCCTTCCCTCGAATAAATAATATAAGTTTTTGGTTAATCCCTCCTTCATTAATAATTTTAATTTTAAGAAATATTTTGAATAATGGAGTTGGAACTGGTTGAACAGTTTATCCTCCATTATCTTTAAATATTAGTCATAATGGATCTTCAGTAGATATAGCAATTTTTTC…
RRMFG2330-15|Anticlea	6941	425	4235	789	505	1512	254	494	562	1118	164	165	69	462	362	234	541	294	85	79	131	AATTTTATATTTTATATTTGGTATATGATCAGGAATAATTGGTTCTTCGATAAGTATTATTATCCGCCTAGAATTAGGAACCCCCGGATTTTTAATTAATAATGATCAAATTTATAACTCAATTGTAACAGCACACGCTTTTATTATAATTTTCTTTATAGTTATACCAATTATAATTGGAGGATTTGGTAATTGATTAATCCCTTTAATACTAGGATCTCCAGATATAGCTTTCCCTCGAATAAATAATATAAGTTTTTGACTACTCCCCCCATCAATTTTTATATTAATCAATAGAAGAATTATTAATCAAGGTGTAGGGACAGGATGAACTATTTACCCTCCTCTTTCTTCAAATATTAATCATGAAGGTTTATCAATTGATATATCAATTTTTTC…
RRSSA3960-15|Philonthus	463	1187	0	264	215	1579	1329	1154	1139	277	2061	1038	368	1053	958	297	220	22	976	20	9	AATACTATATTTTATTTTTGCTATATGATCAGGAATAATTGGATCTTCACTTAGAATATTAATTCGTATAGAATTAAGAATCCCTGGAAGATGAATCTCCAATGACCAAATATTTAATACTATTGTTACTTCTCACGCATTTATTATAATTTTTTTTATAGTTATACCTTTTATAATTGGAGGTTTCGGAAATTGATTAGTACCATTAATAATTGGAGCACCAGATATAGCATTCCCACGAATAAATAATATAAGATTCTGACTTTTATCCCCTTCACTATTATTACTTCTATTAAGAAGAATATTAACATCAGGTTCAGGAACAGGATGAACCATTTATCCCCCATTATCATCTATTATATATCATAATTCAATATCGGTTGATTTAACAATTTTTTC…
RRMFI4230-15|Brachicoma	77	1536	22	184	1276	1161	889	744	840	15	93	1009	882	1047	909	601	985	261	396	172	131	AACTTTATATTTTATTTTTGGCCTATGGGCAGGAATATTGGGAACATCTTTAAGAATTTTAATTCGAGCCGAATTAGGAAACCCTGGAACTTTAATTGGAAATGACCAAATTTATAATGTAATTGTAACTGCCCATGCATTCGTTATAATTTTTTTTATGGTAATACCAATTATAATTGGGGGTTTTGGAAATTGATTAGTTCCCTTAATACTAGGGGCTCCAGATATAGCCTTTCCTCGAATAAATAATATGAGATTTTGATTATTGCCACCTTCTCTTTTATTTTTAGTGATAAGAAGAATTGTTGAAAATGGAGTAGGAACTGGATGAACAGTTTATCCACCTTTATCAGCTAATACCGCCCATAGGGGATCTTCTGTAGATTTAGCAATTTTTAG…
RRMFG2616-15|Exorista	674	887	782	269	2424	143	298	400	260	110	1278	376	134	467	529	617	1111	1231	520	320	177	TGTATTATACTTTATTTTTGGTATATGAGCTGGAATATTAGGATCATCTATAAGAATTATTATTCGAATAGAATTAGGTAATCCTGGTATATTTATCAATAATGACCAAATTTATAATTCCATCGTAACAGCCCATGCCTTCATTATAATTTTTTTTATAGTTATACCAATTATAATTGGTGGATTTGGAAATTGATTAATCCCTTTAATATTAGGAGCCCCAGATATATCATTCCCACGTATAAACAATATAAGATTTTGATTATTACCCCCATCTTTATTTCTATTAATTAATAGAAGAATTATTAATCAAGGAGTTGGGACAGGTTGAACTGTTTACCCACCACTATCATTAAATATAAATCATGAAGGTATATCTGTAGATTTAGCCATCTTTTC…
RRSSA4293-15|Zaphne	389	754	8	299	943	656	587	504	619	15	152	574	977	1078	1001	1340	1098	412	509	168	122	TATTTTATACTTTATTTTAGGTATATGATCAGGAATAATTGGTTCTTCATTGAGTATTATTATTCGTATAGAATTAGGGAATCCTGGTTATTTAATTAATAATGATCAAATTTATAACTCAATTATTACTATACATGCTTTCATTATAATTTTTTTTATAGTAATACCAATTATAATCGGAGGATTTGGAAATTGATTAATTCCCCTTATAATAGGAGCACCAGATATATCATTTCCACGAATAAATAATATAAGATTTTGATTACTACCACCATCTTTAATATTATTAATTAGAAGTAGTATTACAAATCAAGGAGTAGGGACCGGATGAACTATTTATCCACCATTATCATTAAATTTAAATCATGAAGGAATATCATTAGATATATCTATTTTTTC…
RRMPB104-15|Scathophaga	911	1144	41	168	225	484	762	667	323	2	110	1306	1691	1544	969	306	451	394	1157	97	58	TATACTATATTTTATCTTTGCTATATGATCAGCTTCTTTTGGTGCCTCATTAAGAATAATTATCCGCATAGAATTAAGAGTCCCAGGTGGATGAATTAATAACGATCAAATTTATAATTCAATTGTAACCTCACACGCATTTATTATAATTTTTTTTATAGTTATACCTTTCATAATTGGGGGATTTGGAAACTGATTAGTTCCCTTAATAATTGGAGCCCCAGATATAGCATTCCCACGAATAAATAATATAAGATTCTGATTATTAATTCCTTCACTATTTATATTAATCTTAAATATAATTTTTAATTCAGGATCAGGTACAGGATGAACTGTTTACCCTCCTCTTTCATCTATTGAATATCACCCCACATCATCAGTTGATTTCACCATTTTTTC…
RRGCO649-15|Rivula	1935	1583	714	1160	335	416	1111	1068	1829	28	84	486	396	608	560	103	272	799	470	318	294	AACATTATATTTTATTTTTGGTATTTGAGCAGGAATAATTGGTACATCATTAAGTTTATTAATCCGAGCAGAATTAGGAAATCCTGGATCATTAATTGGAGATGACCAAATTTATAATACTATTGTTACAGCTCATGCTTTTATTATAATTTTTTTTATAGTAATACCTATTATAATTGGAGGATTTGGAAATTGATTAGTCCCATTAATATTAGGAGCCCCTGATATAGCTTTCCCCCGTATAAATAATATAAGTTTTTGACTTCTCCCCCCATCAATTATACTTTTAATTTCAAGAAGAATTGTAGAAAATGGAGCAGGAACAGGATGAACAGTGTACCCCCCACTTTCATCAAATATTGCTCATAGTGGAAGATCAGTAGATTTAGCAATTTTTTC…
RRGCO532-15|Protodeltote	2432	1561	119	936	258	932	1031	1209	1644	116	2083	434	641	679	349	154	227	163	273	184	201	AACTTTATATTTTATTTTTGGAATTTGAGCCGGTATAATCGGAACTTCATTAAGACTATTAATTCGAGCTGAATTAGGAAATCCAGGATCTTTAATTGGAGATGATCAAATTTATAATACTATTGTTACAGCTCATGCTTTTATTATAATTTTTTTCATAGTTATACCCATCATAATTGGAGGATTTGGAAATTGATTAGTACCTTTAATATTAGGAGCCCCTGATATAGCATTTCCACGAATAAATAACATAAGATTTTGATTACTCCCCCCCTCAATTACCCTTTTAATTTCAAGTAGAATTGTGGAAAATGGAGCTGGTACCGGATGAACTGTTTACCCCCCTCTTTCATCTAATATTGCCCATGGAGGAAGATCTGTCGATTTAGCTATTTTCTC…
RRMFD549-15|Coleocentrus	3099	2368	54	1176	253	674	538	535	563	84	215	556	868	800	408	267	398	193	507	382	413	AATTCTTTATTTCATTTTTGGTATATGATCAGGTATAATAGGATCATCTTTAAGATTATTAATTCGAATAGAACTAGGTAACCCTGGTTATTTAATTAATAATGATCAATTATATAATTCTATTATTACCTCCCATGCTTTTATTATAATTTTTTTTATAGTTATACCCATTATAATTGGAGGATTTGGAAATTGAATAATTCCTTTAATACTTGGGGCCCCTGATATAGCTTTCCCTCGAATAAATAATATAAGATTTTGACTTTTACCACCCTCTATTAATTTATTAATTTTAAGAAATATAACAAATCAAGGAGTTGGCACAGGATGAACAGTTTACCCGCCCCTTTCATTAAATTTAAATCATGAGGGAATAGCATTAGATATAGCAATTTTTTC…
RRGCO271-15|Renia	430	1021	292	548	161	2194	1193	1218	1602	89	1210	616	793	734	390	165	151	184	412	181	248	AATATTATATATTATTTTTGCTTTATGATCAGGAATAATTGGAACTTCTATAAGATTTATTATTCGTATAGAATTAAGTAATCCTGGTGAATGAATTATAAATGATCAAATTTATAATTCTTTAGTTACAGCTCATGCTTTTTTAATAATTTTTTTTATAGTAATACCTTTTATAATTGGAGGATTTGGTAATTGATTAGTTCCTTTGATATTAGGATGTCCTGATATAGCTTTTCCTCGTATAAATAATATTAGATTTTGATTATTACCTCCATCTTTAATTTTATTATTATTAAGAAATTTATTTAATATTACTCCAGGAACAGGATGAACAGTTTATCCTCCATTATCTTCATCAATATTTCATAGATCTCCTTCAGTTGATTTAGCAATTTTTTC…
RRMFA194-15|Muscina	3704	3366	4	3	316	1379	1121	1008	1176	11	582	717	520	661	455	77	205	1009	410	0	1	AACATTATATTTTATTTTTGGAATTTGAGCAGGTATAGTAGGAACTTCCTTAAGATTATTAATTCGAGCTGAATTAGGAAACCCCGGATCTTTAATTGGAGATGATCAAATTTATAATACCATTGTTACTGCCCATGCTTTTATTATAATTTTTTTTATAGTTATACCTATTATAATTGGAGGTTTTGGTAATTGATTAATTCCTCTTATATTAGGAGCACCTGATATAGCTTTCCCTCGAATAAATAACATAAGTTTTTGATTACTCCCCCCATCTTTAACTTTATTAATTTCAAGAAGAATTGTAGAAAACGGAGCAGGAACAGGATGAACAGTTTACCCCCCACTTTCATCTAATATTGCTCACGGAGGAAGATCTGTAGATTTAGCTATTTTTTC…
RRGCO425-15|Spilonota	1284	460	2602	473	462	1370	865	874	1401	157	443	532	568	499	367	601	652	245	303	112	153	AACATTATATTTTATTTTTGGAATTTGAGCAGGAATAGTTGGTACTTCTTTAAGATTACTAATTCGAGCTGAATTAGGAAACCCAGGATCTTTAATTGGAGATGATCAAATTTACAATACTATTGTTACCGCTCATGCTTTTATTATAATTTTTTTCATAGTTATACCTATTATAATTGGAGGATTTGGTAATTGATTAGTTCCTCTTATATTAGGAGCCCCTGATATAGCTTTCCCACGAATAAATAATATAAGTTTTTGATTGTTACCCCCATCTCTAACATTATTAATTTCAAGAAGTATTGTAGAAAATGGAGCAGGAACAGGTTGAACAGTGTACCCCCCACTTTCATCTAATATTGCCCATGGAGGTAGTTCTGTTGATTTAGCTATTTTTTC…
RRGCO691-15|Horisme	2140	876	239	2257	159	2487	426	625	677	250	535	252	331	1049	479	116	337	131	256	248	349	CACTTTATATTTCATCTTAGGAATATGAGCAGGAATATTAGGAACATCATTAAGATGAATTATTCGAATCGAATTAGGAATACCAGGATCATTCATTGGGGATGATCAAACATATAATGTAGTAGTCACCGCACATGCATTTATCATAATCTTTTTTATAGTAATACCAATCATAATTGGAGGATTTGGAAATTGACTAGTACCTTTAATAATTGGAGCCCCTGATATAGCATTCCCACGAATAAATAACATAAGATTCTGATTATTACCCCCCTCAATTACATTATTAATTATAAGAAGAATTGTAGAAAAAGGTGCAGGTACTGGATGAACAGTATATCCACCATTATCAGCAAACATCGCACATAATGGAGCATCAGTAGATTTAGCAATCTTCTC…
RRSSA2286-15|Emmesa	720	835	0	12	1006	529	585	626	480	4	751	923	1019	1123	830	1029	1333	225	315	5	91	AACATTATACTTTATTTTTGGTGCATGAGCTGGAATAGTAGGAACTTCATTAAGTATATTAATTCGAGCTGAATTAGGAAATCCTGGATCATTAATTGGAGATGACCAAATTTATAATGTTATTGTTACAGCACATGCATTTGTTATAATTTTTTTTATAGTAATACCAATTATAATTGGGGGATTTGGAAATTGATTAGTTCCATTAATATTAGGTGCACCTGATATAGCTTTTCCTCGAATAAATAATATAAGATTTTGACTTTTACCCCCATCTTTAACCCTTCTTTTGATAAGAAGATTAGTGGAAAGAGGAGCAGGTACCGGATGAACAGTATACCCTCCTTTATCATCTGGTATTGCCCATAGAGGAGCTTCTGTAGATTTAGCTATTTTTAG…
RRMFG2783-15|Clepsis	1232	1409	3496	589	992	1026	796	734	1040	27	1663	215	400	331	243	459	617	115	101	58	59	AACCCTATATTTTATTTTTGGAGCTTGAGCTGGAATAATTGGAACTTCTTTAAGAATTTTAATTCGAGCAGAATTAGGACATCCAGGAGCTTTAATTGGAGATGACCAAATTTATAATGTAATTGTAACAGCACATGCTTTTGTTATAATTTTTTTTATAGTAATACCAATTATAATTGGAGGATTTGGAAATTGATTAGTTCCGTTAATACTCGGGGCCCCTGATATAGCTTTCCCACGAATAAATAACATAAGTTTTTGAATATTACCCCCTTCATTAACCCTTTTATTAGCTTCTAGTATAGTAGAAGCAGGAGCAGGAACAGGATGAACAGTTTATCCCCCACTATCGGCTAGAATTGCCCATGGAGGGGCTTCAGTAGATTTAGCTATTTTTTC…
RRSSA2287-15|Schizotus	1403	43	130	905	114	688	1014	1297	1269	113	376	478	612	562	520	637	1264	881	228	159	108	AACATTATATTTCTTATTTGGAACTTGAGCCGGAATAGTAGGAACCTCTTTAAGTGTATTAATTCGTGCAGAACTTGGTCATCCTGGTGCTTTAATTGGAGATGATCAAATTTATAATGTTATTGTTACTGCTCATGCTTTTGTAATAATTTTTTTTATAGTAATACCAATTATAATTGGAGGATTTGGAAATTGATTAGTTCCTTTAATATTAGGAGCACCTGATATAGCCTTTCCTCGAATAAATAATATAAGTTTTTGATTATTACCTCCTTCTTTAACACTTTTATTAGTAAGAAGAATAGTTGAAAATGGAGCTGGGACAGGTTGAACAGTTTATCCACCTTTATCTGCAAGAATTGCTCATGGTGGAGCTTCTGTAGATTTAGCCATTTTTTC…
RRSSC6606-15|Tetrix	735	1098	2888	1025	1291	361	965	858	579	40	76	652	80	136	517	496	1133	467	329	75	188	AACACTGTATTTTATTTTTGGAGCTTGATCAGGAATAATTGGAACTTCTTTAAGAATTCTAATTCGAGCCGAACTAGGACATCCCGGTGCTTTAATTGGAGATGATCAAATTTATAACGTAATTGTTACAGCACATGCTTTTATTATAATTTTTTTTATAGTAATACCAATTATAATTGGAGGATTTGGAAACTGATTAGTTCCTTTAATACTTGGAGCTCCAGATATAGCCTTTCCACGAATAAATAATATAAGTTTTTGACTTCTTCCTCCTGCATTAACTCTTTTATTAGTCAGTAGTATAGTCGAAAACGGAGCTGGAACTGGTTGAACAGTTTACCCTCCTTTATCAGCTAATATCGCTCATGGAGGAGCTTCTGTTGATTTAGCTATCTTTTC…
RRMFI4021-15|Eutettix	1	1161	46	30	931	771	376	350	625	499	122	825	0	727	813	869	1042	990	192	248	332	AATATTGTACTTCATTTTCGCCATATGAGCAGGGATAATTGGAGCCTCACTAAGATTTATTATTCGAATAGAACTAAGAAACCCAGGTGCTTGAATCAATAATGATCAAATTTATAATTCAATTGTAACTTCACACGCCTTCATTATAATTTTCTTCATAGTAATACCATTCATAATCGGAGGTTTCGGAAACTGACTCACACCGTTAATATTAGGAGCGCCCGACATGGCTTTCCCGCGAATAAACAACATAAGGTTCTGACTACTTCCTCCGTCAATCTTAATTATCCTAATAAGCATAATTTTAAATTCAGGATCAGGAACAGGATGAACAGTTTATCCCCCCCTATCATCATATTCCTTTCACCCATCATCATCAGTAGATTTAACAATTTTCTC…
RRSSC6587-15|Diplocheila	3699	1163	22	813	743	470	594	654	636	373	1703	484	385	479	450	92	347	967	455	128	101	AACATTATATTTTATTTTTGGAATTTGAGCCGGAATAGTGGGAACTTCTTTAAGTTTATTAATTCGAGCAGAATTAGGAAATCCCGGATCATTAATTGGAGATGATCAAATTTATAATACAATTGTAACAGCTCACGCTTTTATTATAATTTTTTTTATAGTTATACCTATTATAATTGGAGGATTTGGAAATTGATTAGTACCTTTAATATTAGGAGCTCCCGATATAGCTTTCCCTCGAATAAACAATATAAGATTTTGACTTCTTCCCCCCTCATTAACCCTTTTAATTTCAGGAAGAATTGTAGAAAATGGTACTGGAACTGGTTGAACAGTTTACCCCCCTTTATCATCTAATATTGCTCATAGAGGTAGATCTGTTGATTTATCAATTTTCTC…
RRSSA270-15|Cladius	1042	1631	104	98	1229	361	718	797	764	7	728	994	871	483	379	1136	1011	249	74	110	62	AACATTATATTTTATTTTTGGATTTTGATCAGGAATACTAGGAATATCATTTAGAATATTAATCCGAACAGAATTAGGAATACCAGGATCTTTAATTGGAAATGATCAAATTTATAATGTAATTGTAACATCTCACGCATTTCTAATAATTTTTTTTATAGTTATACCAATTATAATCGGAGGATTTGGAAACTGATTAGTACCCCTAATATTAGGAGCTCCTGATATAGCATTCCCACGATTAAATAATATAAGATTTTGATTTCTACCCCCATCAATAATCCTATTATTATCAAGAAGTATAGTAAATTCAGGATCAGGAACAGGATGAACAGTTTATCCTCCTTTATCAAGAAGAATTTCACATGCAGGAGCATCTGTAGATTTAACTATTTTTTC…
RRSSC6594-15|Ophonus	2551	2341	6	183	325	498	677	715	461	83	905	151	9	1004	757	188	482	1347	631	138	100	AACTTTATATTTTATTTTTGGTGCTTGAGCAGGAATAGTTGGAACTTCTTTAAGAATTTTAATTCGCGCTGAATTAGGTCATCCAGGAGCATTAATTGGAAATGATCAAATTTATAATGTTATTGTAACAGCTCATGCTTTTATTATAATTTTTTTTATAGTTATACCTATCATAATTGGAGGATTTGGAAATTGATTAGTCCCGTTGATATTAGGGGCCCCCGACATAGCTTTTCCACGAATAAATAATATAAGTTTTTGAATACTTCCCCCCTCTTTAACTCTTTTACTAGCTTCTTCTATAGTAGAAGCTGGAGCAGGGACTGGTTGAACAGTTTATCCCCCTTTGTCAGCTAGAATTGCGCATGGAGGAGCATCAGTAGATTTAGCAATTTTTTC…
RRMPA009-15|Phorocera	661	1753	1260	406	1225	389	261	310	190	119	1651	610	914	412	421	854	548	319	350	122	96	TACTCTTTATTTCATTTTTGGAGCATGATCAGGGATAGTAGGAACTTCTTTAAGAGTTCTTATTCGTTCCGAATTAGGAAACCCTGGATCATTAATCGGAGATGACCAAATTTATAACGTTATCGTTACAGCTCATGCTTTCATTATAATTTTCTTTATAGTTATGCCTATTATAATTGGAGGATTCGGAAATTGATTAGTTCCTCTAATACTAGGAGCACCAGACATAGCATTTCCTCGAATAAATAATATAAGATTCTGACTTTTACCCCCTTCTTTAACCCTCTTAATTATAAGAAGAATTGTAGAAAGAGGAGCAGGGACAGGATGAACTGTATACCCACCTCTTTCTGCAAATGTTGCCCATAGAGGTTCATCTGTTGATCTAGCTATCTTCAG…
RRSSC7812-15|Ischnura	0	6777	1411	1524	141	1270	1003	701	1408	1275	2	50	3	500	328	0	82	0	0	0	97	GACTTTATATTTTATTTTTGGAGCTTGAGCAGGTATAGTAGGAACTTCTTTAAGAATTCTTATTCGAGCTGAATTAGGTCACCCAGGAGCTTTAATTGGAGATGATCAAATTTATAATGTAATTGTTACAGCCCATGCTTTCATTATAATTTTTTTCATAGTTATACCTATTATAATTGGGGGGTTCGGAAATTGACTAGTTCCTATTATACTTGGAGCTCCTGATATAGCATTCCCTCGAATAAATAATATAAGATTCTGATTACTTCCTCCTGCACTAACTCTATTATTAGTAAGTAGTATAGTGGAAAATGGAGCTGGAACAGGTTGAACTGTTTACCCTCCTCTATCTTCTAATATTGCACATGGAGGGGCTTCAGTAGATTTAGCAATTTTTTC…
RRSSC7829-15|Dicranomyia	814	1132	0	178	95	458	1687	1737	2367	49	462	327	604	589	289	80	176	971	514	169	133	TACTTTATACTTTATTTTTGGAGCCTGATCAGGAATAGTAGGAACTTCCCTAAGTATCCTAGTACGTGCTGAATTAGGACACCCTGGTGCTTTAATTGGAGATGATCAAATTTATAACGTAATTGTAACAGCTCATGCATTTATTATAATTTTTTTTATAGTTATACCAATTATAATTGGAGGATTTGGTAATTGATTAGTTCCTTTAATACTAGGAGCCCCAGATATAGCCTTTCCTCGAATAAATAATATAAGTTTTTGACTTCTACCTCCTGCACTAACTCTACTTCTAGTAAGTAGTATAGTTGAAAAGGGAGCTGGTACTGGCTGAACTGTTTACCCTCCCTTATCTTCTAATATTGCTCATAGAGGAGCTTCAGTAGATTTAGCAATTTTTTC…
RRMFC2001-15|Synstrophus	3144	2899	1	0	124	652	1245	1153	1549	0	297	36	0	551	534	92	152	1691	738	0	0	TACTTTATATTTCTTATTTGGAGCCTGAGCTGGAATAGTAGGTACTTCATTAAGTATTTTAATTCGAGCAGAATTAGGACATCCAGGAGCATTAATTGGTGATGATCAAATTTATAATGTAATTGTCACTGCTCATGCATTTGTTATAATTTTCTTTATAGTTATACCTATTATAATTGGTGGATTTGGAAATTGACTAGTACCCCTAATACTAGGTGCCCCAGATATAGCATTTCCACGAATAAATAATATAAGATTTTGAATATTACCTCCATCTTTAACATTACTATTAGTAAGTAGTATAGTTGAAAATGGGGCTGGTACAGGTTGAACTGTTTACCCACCTTTATCATCAACAATTGCACATGGTGGTGCATCAGTTGATTTAGCTATTTTTAG…
RRMFG2779-15|Pegomya	441	1530	140	660	320	805	487	579	359	84	527	1045	1488	883	570	257	403	395	239	295	170	AACATTATATTTTTTATTCGGATTTTGATCAGGAATATTAGGGTTATCTTTTAGAATATTAATCCGAACAGAACTAGGCATACCTGGATCAATAATTGGAGATGATCAAATTTATAATGTTATTGTTACATCACATGCATTCTTAATAATTTTTTTTATAGTTATACCTATTATAATTGGAGGATTTGGTAATTGATTAATCCCATTAATATTAGGAGCACCAGATATAGCATTTCCACGATTAAACAATATAAGATTTTGATTTTTACCCCCTTCAATTACTTTATTATTAGCTAGAAGAATAGTTAATTCAGGATCAGGAACAGGATGAACAGTTTATCCTCCTCTATCAAGAAGTATTTCTCATGCAGGACCATCAGTTGATTTAACTATTTTTTC…
RRGCO124-15|Aethes	1741	529	344	816	171	825	761	476	1167	63	1225	411	593	411	343	1206	731	253	268	115	134	TACTTTATATTTTATTTTTGGAATTTGAGCAGGAATAGTAGGAACTTCTTTAAGACTTTTAATTCGAACTGAATTAGGAAATCCCGGATCTTTAATTGGAGATGACCAAATTTATAATACTATTGTTACAGCTCATGCTTTTATTATAATTTTTTTTATAGTTATACCTATTATAATTGGAGGATTTGGAAATTGATTAGTACCTTTAATATTAGGAGCTCCTGATATAGCTTTCCCCCGAATAAATAATATAAGTTTTTGATTACTACCCCCATCATTAATTTTATTAATTTCTAGTAGAATTGTAGAAAATGGAGCAGGAACAGGATGAACAGTTTACCCACCCCTCTCATCTAATATTGCCCATAGAGGAGCTTCAGTAGACTTAGCAATTTTTTC…
RRGCO478-15|Cochylis	845	1250	462	76	954	1383	786	1052	1268	61	787	222	69	570	549	345	840	740	291	119	90	AACATTATACTTTATTTTTGGAATTTGATCTGGTATAGTAGGAACATCATTAAGATTATTAATTCGAGCAGAATTAGGTAATCCAGGATCCTTAATTGGAGATGATCAAATTTATAATACTATTGTAACTGCTCATGCATTTATTATAATTTTTTTTATAGTTATACCTATTATAATTGGAGGATTTGGAAATTGATTAGTACCTTTAATATTAGGAGCACCTGATATAGCTTTCCCACGAATAAATAATATAAGATTTTGATTACTTCCTCCTTCATTAATATTATTAATTTCAAGAAGAATTGTTGAAAATGGAGCAGGAACAGGATGAACAGTATACCCCCCACTTTCATCTAATATTGCTCATAGAGGAAGTTCTGTAGATATAGCTATTTTTTC…
RRMFC2016-15|Helina	2434	1873	220	813	249	301	502	582	339	94	876	778	765	559	352	81	187	203	601	339	379	TATATTATATTTTTTATTTGGTATATGAGCTGGAATAGTAGGATTATCAATAAGTTTAATTATTCGTATAGAGTTAGGGATGCCTGGGAGATTACTTGGAAATGATCAAATTTATAATAGAATAGTTACAGCACATGCTTTTGTAATAATTTTTTTTATGGTTATACCAATTATAGTAGGTGGATTTGGAAATTGATTATTACCTTTAATATTAGGGGCGCCTGATATAGCTTTCCCTCGAATAAATAATATAAGATTTTGATTACTTATTCCTTCTTTGATTTTATTATTATTAAGAGGTATTTTAAATGTTGGTGTAGGTACTGGATGAACTGTTTATCCTCCTTTATCTTCATCTTTAGGTCATAGAGGAATTTCAGTTGATTTAGCTATTTTTTC…
RRMFD562-15|Platydracus	2649	397	351	3994	108	80	162	165	51	15	33	286	150	1378	447	791	594	217	585	351	80	AACATTATATTTTATTTTTGGAATTTGAGCAGGTATAGTTGGAACTTCTTTAAGATTATTAATTCGAGCTGAATTAGGAAATCCTGGATCTTTAATTGGAGATGATCAAATTTATAATACTATTGTAACAGCTCATGCCTTTATTATAATTTTCTTTATAGTTATACCTATTATAATTGGAGGATTTGGTAATTGATTAGTTCCTCTAATATTAGGAGCCCCTGATATAGCTTTTCCTCGAATAAATAATATAAGTTTTTGACTCCTCCCCCCCTCACTAACTTTATTAATTTCAAGAAGAATTGTAGAAAATGGAGCTGGTACAGGATGAACAGTATACCCCCCACTTTCATCTAATATTGCCCATAGAGGAAGCTCAGTAGACTTAGCTATTTTTTC…
RRMFB1229-15|Gonia	1057	2086	383	138	245	1286	843	888	1049	915	1828	102	4	294	263	92	213	1092	337	117	71	AACTTTATATTTTATTTTTGGAATCTGATCAGGTATAGTAGGAACATCTATAAGTCTTTTAATTCGAGCTGAATTAGGAACCCCTGGATCTTTAATTGGAGATGATCAAATTTATAATACTATTGTTACAGGTCATGCTTTCATTATAATTTTTTTTATAGTTATACCTATTATAATTGGAGGTTTTGGAAATTGATTAGTCCCATTAATATTAGGAGCTCCAGATATAGCTTTCCCACGAATAAATAATATAAGTTTTTGACTTTTACCCCCCTCTCTTACTTTATTAATTTCAAGAAGAATTGTAGAAAATGGAGCAGGAACTGGTTGAACAGTATACCCTCCTTTATCTTCTAATATTGCTCATGGAGGAAGTTCTGTTGATCTAGCTATTTTTTC…
RRSSA244-15|Nephrocerus	1000	747	976	200	1901	321	393	432	281	289	39	559	202	284	330	375	850	957	352	293	313	TACTTTATATTTTATTTTTGGAGCTTGATCAGGTATAATTGGTACTTCATTAAGAATTTTAATTCGGGCTGAATTAGGACATCCTGGTGCTTTAATTGGAGATGATCAAATCTATAATGTAATTGTAACAGCACATGCTTTTATTATAATTTTTTTTATAGTAATACCAATTATAATTGGAGGATTTGGAAATTGATTAGTTCCTTTAATATTAGGAGCTCCAGATATAGCATTTCCACGAATAAACAATATAAGTTTTTGATTACTACCTCCTGCTTTAACATTATTGTTAGTTAGTAGTATAGTTGAAAATGGAGCTGGAACTGGATGAACTGTTTACCCTCCGCTTTCTTCTAATATTGCTCATGAAGGAGCTTCTGTTGATTTAGCAATTTTTTC…
RRGCO629-15|Scoparia	1776	2043	102	845	125	1102	1160	884	1338	82	1007	487	803	333	161	88	125	167	292	181	200	AACATTATATTTTATTTTTGGTATTTGAGCTGGAATAGTAGGAACTTCATTAAGATTATTAATTCGAGCCGAATTAGGAAATCCTGGTTCTTTAATTGGTGATGATCAAATTTATAATACTATTGTTACAGCACATGCTTTTATTATAATTTTTTTTATAGTTATACCTATTATAATCGGAGGATTTGGTAATTGACTTGTTCCTCTTATATTAGGAGCCCCAGATATAGCTTTCCCTCGAATAAATAATATAAGTTTTTGACTTCTTCCCCCCTCTTTAACTCTTTTAATTTCGAGTAGAATTGTAGAAAATGGAGCAGGTACAGGATGAACAGTATATCCCCCACTTTCATCTAATATTGCTCATGGGGGTAGATCTGTAGATTTAGCTATTTTCTC…
RRMFB1276-15|Dasyphora	2402	1424	13	1184	164	1047	867	765	782	228	37	566	475	769	540	9	293	833	564	24	118	AACCCTTTATTTTATTTTCGGAGCATGAGCCGGAATACTAGGTACCTCCTTAAGACTACTAATCCGAGCAGAATTAGGCAATCCAGGTTCACTGATTGGTAATGACCAAATCTACAATGTTATTGTAACAGCTCACGCTTTCATCATAATTTTCTTTATAGTTATACCAATCATAATTGGAGGATTCGGAAACTGACTAGTCCCCCTAATACTTGGGGCCCCAGACATGGCATTCCCTCGAATAAACAACATAAGATTCTGATTGCTTCCACCGTCACTAAGACTTTTATTAATAAGAAGAATTGTAGAAAACGGAGCAGGGACAGGATGAACTGTCTACCCCCCTCTCTCAGCAAATATTGCCCACAGAGGATCTTCAGTTGATTTAGCAATTTTTAG…
RRGCO711-15|Speranza	3304	410	5165	1289	354	493	159	186	138	324	371	239	212	498	405	280	345	36	135	136	184	AATATTATATTTTATTTTCGCTATATGATCTGGAATAATTGGTTCATCAATAAGAATATTAATTCGTATAGAATTAAGAATTCCTGGAAGATGAATTTCAAATGATCAATTATTTAATACTATTGTAACTTCTCATGCATTTATTATAATTTTTTTCATAGTTATACCTTTTATAATTGGAGGATTCGGAAATTGACTTATCCCATTAATAATTGGAGCTCCAGATATGGCCTTTCCACGAATAAATAACATAAGATTTTGACTTTTAGTCCCATCATTATTTTTATTACTATTAAGAAGAATATTAATACCAGGATCTGGGACAGGTTGAACAATTTACCCCCCATTATCATCCATCATTTACCATAATTCTAGATCTGTTGATTTAACAATTTTTTC…
RRMFG2647-15|Athrycia	1152	2536	175	35	372	597	654	832	703	20	1075	994	256	448	328	111	193	1428	553	67	36	GACTCTATATTTTATTTTTGGTGCATGAGCTGGAATAGTAGGAACTTCATTAAGTCTACTAATTCGATCAGAGCTGGGTACACCCGGAACATTAATTGGTAATGACCAAATTTATAATGTTATTGTTACTGCTCATGCTTTTATCATAATTTTCTTTATAGTTATACCAATTATAATTGGAGGATTTGGAAATTGATTAGTACCCCTAATATTAGGAGCACCTGATATAGCATTTCCACGAATAAATAATATAAGATTTTGACTTTTACCTCCGTCCCTATCTTTACTTTTAATAAGAAGAATAGTAGAAAGAGGGGCAGGAACAGGATGAACTGTTTATCCTCCTTTATCTTCAAATATTGCTCATGGGGGTTCTTCTGTTGATTTAGCAATCTTCAG…
RRSSC6090-15|Publilia	0	2546	770	607	1668	1326	1314	1012	1249	152	99	296	231	435	383	0	481	671	6	0	59	AATCTTATATTTCATTTTTGGAATATGATCAGGAATAATTGGATCTTCTATAAGTATAATTATTCGATTGGAATTAGGAAATCCTGGTTATTTAATTAATAATGATCAAATTTATAACTCTATAGTAACTTCACATGCTTTTATTATAATTTTTTTTATAGTAATACCAATTATAATTGGAGGATTTGGCAACTGATTAATCCCTTTAATATTAGGAGCCCCCGATATAGCCTTTCCTCGTATAAATAATATAAGATTTTGACTCCTCCCACCTTCTCTTATATTATTACTTTTTAGAAATATCTCAAATCAAGGTGTTGGAACAGGATGAACAGTTTATCCTCCTTTATCTTTAAATATAAGACATGAAGGATTAGCTGTTGATCAATCAATTTTTTC…
RRGCO704-15|Crambus	864	1216	312	1534	1095	849	457	578	677	106	661	402	489	554	433	579	655	88	165	104	162	TACATTATATTTTATATTTGGAATTTGAGCAGGTATAGTAGGAACATCATTAAGATTATTAATTCGAGCTGAACTAGGAAATCCTGGATCTTTAATTGGTGATGATCAAATTTATAATACTATTGTAACAGCTCATGCTTTTATTATAATTTTTTTTATAGTTATACCTATTATAATTGGAGGATTTGGAAATTGATTAGTTCCTTTAATATTAGGAGCCCCTGATATAGCTTTCCCTCGTATAAATAATATAAGATTTTGACTTTTACCCCCTTCTATTATACTTTTAATTTCAAGAAGAATTGTAGAAAATGGAGCTGGTACAGGATGAACAGTATACCCCCCACTTTCATCAAATATTGCTCATAGAGGAAGATCAGTAGATTTAGCAATTTTTTC…
RRMFD001-15|Entylia	61	586	161	35	488	563	559	619	882	1	3423	109	483	572	509	90	1279	733	113	5	26	AACTTTATATTTTATCTTTGGAATCTGAAGAGGAATAGTAGGAACATCTTTAAGTTTACTTATTCGAGCTGAATTAGGAAATCCAGGATCTTTAATTGGAGATGATCAAATTTATAACACAATTGTTACAGCTCATGCATTTATTATAATTTTTTTTATAGTTATGCCAATTATAATTGGAGGATTTGGAAATTGATTAATCCCTCTTATATTAGGAGCCCCTGATATAGCATTTCCACGAATAAATAATATAAGATTTTGATTACTACCTCCTTCTTTAACTCTTTTAATTTCAAGAAGAATTGTAGAAAATGGAGCAGGAACTGGGTGAACTGTTTATCCCCCTCTTTCATCTAATATTGCCCATGGAGGAAGCTCAGTTGATTTAGCAATTTTCTC…
RRSSA2346-15|Platycerus	3	507	4021	736	44	259	509	317	109	812	255	590	1	466	431	85	152	1114	377	175	165	AACTTTATATTTTATTTTTGGAATTTGAGCAGGAATAGTAGGAACTACCTTAAGTCTTTTAATTCGGGCTGAATTAGGAACTCCAGGATCTTTAATTGGTGATGATCAAATTTATAATACTATTGTTACTGCCCATGCTTTTATTATAATTTTTTTTATGGTAATACCTATTATAATTGGAGGATTTGGAAATTGATTAGTGCCTCTTATATTAGGGGCCCCAGATATAGCTTTCCCTCGTATAAATAATATAAGATTTTGACTTTTACCACCTTCTTTAATACTTTTAATTTCTAGAAGAATTGTAGAAAATGGAGCAGGAACAGGTTGAACTGTTTATCCCCCCCTCTCATCTAATATTGCACATGGAGGAAGATCTGTGGATTTGGCTATTTTTTC…
RRGCO309-15|Orthonama	1196	180	1369	268	229	2027	412	557	756	159	1153	304	301	688	550	191	359	539	176	64	95	AACTTTATATTTTTTATTAGGAATTTGATCAGGAATAGTAGGAACATCTATAAGATTATTAATTCGAGCTGAATTAGGTACTCCCGGTTCCTTAATTGGTGATGATCAAATTTATAATACTATTGTCACTGGACATGCTTTTATTATAATTTTTTTTATAGTAATACCTATTATAATTGGAGGATTTGGAAATTGATTAGTACCTTTAATACTAGGAACTCCTGATATGGCTTTTCCTCGAATAAATAATATAAGATTTTGACTTTTACCTCCTTCTCTTACTTTATTAATTTCCAGAAGAATTGTAGAAAATGGAGCTGGAACAGGATGAACAGTATACCCCCCACTTTCATCTAATATCGCTCATGGTGGAAGATCAGTTGATTTAGCTATTTTCTC…
RRBPA087-15|Fannia	744	963	33	155	85	2174	898	795	1057	327	178	813	400	811	511	77	176	125	280	132	169	CACCTTATACTTTATATTTGGAGCATGAGCTGGAATAGTAGGAACTTCTATAAGAATAATTATTCGAGCAGAACTAGGACAACCAGGATCTCTAATTGGAGATGACCAAATCTATAATGTAATTATTACAGCCCACGCATTTGTAATAATTTTCTTTATAGTAATGCCTATTATAATTGGAGGATTTGGTAATTGACTTGTACCATTAATAATTGGAGCACCAGATATAGCTTTTCCACGAATAAATAATATAAGTTTTTGACTTTTACCACCATCACTAACCCTTTTACTTTCCTCATCTATGGTTAATAATGGAGCTGGTACAGGATGAACAGTTTACCCCCCACTCGCTGGGGCGATTGCACATGGAGGAGTGTCAGTTGATTTAGCTATTTTCTC…
RRSSC4128-15|Phyllobius	916	2738	1284	2	157	444	1060	1106	1288	2	102	273	9	363	428	376	208	1038	424	22	13	AACATTATACTTTATTTTTGGAATTTGAGCTGGAATATTAGGAACTTCTTTAAGTTTATTAATTCGAGCTGAATTAGGAAATCCTGGATCATTAATTGGTGATGATCAAATTTATAATACTATTGTAACTGCACATGCTTTTATTATAATTTTTTTTATAGTTATACCTATTATAATTGGAGGTTTTGGAAATTGATTAGTACCTTTAATATTAGGAGCTCCTGATATAGCTTTCCCCCGAATAAATAATATAAGATTTTGACTTCTCCCCCCATCATTAACTCTCCTAATTTCAAGAAGAATTGTAGAAAATGGTAGAGGTACTGGTTGAACAGTTTACCCCCCTTTATCATCTAATATTGCTCATAGAGGAAGATCAGTTGATTTATCTATTTTTTC…
RRSSA2264-15|Cymatodera	3682	1220	0	52	957	259	532	399	445	0	455	604	633	338	286	539	454	668	270	20	181	AACATTATATTTTATTTTTGGAGTATGAGCTGGAATAGTAGGAACTTCTTTAAGTTTATTAATTCGAGCTGAATTAGGAAATCCAGGTTCATTAATTGGGGATGATCAAATTTATAATACAATTGTAACTGCCCATGCATTTATTATAATTTTTTTTATAGTTATACCAATTATAATTGGAGGTTTTGGAAATTGATTAGTACCTTTAATATTAGGAGCTCCTGATATAGCTTTTCCCCGTATAAATAATATAAGTTTTTGATTATTACCTCCTTCTATTATATTATTAATTTCTAGAAGAATCGTAGAAAATGGAGCAGGAACTGGATGAACAGTTTACCCCCCACTTTCATCTAATATTGCTCATAGAGGAAGATCAGTAGATCTTGCAATTTTTTC…
RRMPG971-15|Anthomyia	926	804	651	613	381	163	489	516	500	0	811	594	812	355	251	1007	709	246	317	99	71	AACTTTATATTTTATATTTGGAATATGATCAGGAATAATTGGAATAATATTAAGAATAATTATTCGTGTAGAATTAGGTCAACCAGGGCCATTTATTAATAATGATCAAATTTACAACACAATTATTACATCTCATGCATTCATTATAATCTTCTTTATAGTAATACCAATTATAATTGGAGGATTCGGAAATTGATTATTACCAATTATAATTGGAGCTCCAGATATAGCATTCCCACGGATAAACAATATAAGATTCTGGCTTCTACCACCATCAATTAAAATACTTCTAATTAGATCAATAGTAGAATCAGGAGTTGGTACAGGATGAACAGCTTACCCACCATTATCTAGAAATCTAGGACACTCTGGACCTAGAGTTGAATTTGCAATCTTTTC…
RRGCO700-15|Idaea	1395	506	21	1780	12	1081	878	797	1367	203	120	152	597	583	302	113	228	136	396	247	116	AACTTTATATTTTATTTTTGGAATTTGAGCTGGAATAGTTGGAACATCTTTAAGTTTATTAATTCGGGCAGAATTAGGAAATCCTGGATCTTTAATTGGAGATGATCAAATTTATAATACTATTGTCACAGCTCATGCCTTTATTATAATTTTTTTTATAGTAATACCTATTATAATTGGGGGATTTGGAAATTGATTAGTACCATTAATATTAGGGGCCCCAGATATAGCTTTCCCTCGAATAAATAATATAAGTTTTTGACTTTTACCCCCATCATTAACTCTTTTAATTTCAAGAAGAATTGTTGAAAATGGAGCTGGTACCGGATGAACAGTTTATCCCCCACTATCATCTAATATCGCACATGGAGGAAGATCTGTTGATCTAGCAATTTTTTC…
RRSSC1835-15|Hylemya	735	641	471	67	502	382	498	503	539	8	295	30	1	1335	798	587	621	1186	100	161	83	AACTTTATACTTTATTTTCGGAGCTTGAGCAGGTATAGTGGGAACTTCATTAAGAATTCTTATTCGAGCAGAATTAGGTCACCCTGGTGCATTAATTGGAGATGATCAAATTTATAATGTAATTGTTACAGCCCATGCTTTTATTATAATTTTCTTTATAGTAATACCAATTATAATTGGAGGGTTTGGAAATTGACTAGTACCAATTATATTAGGAGCTCCTGATATAGCTTTCCCCCGAATAAATAATATAAGTTTTTGACTTTTACCTCCAGCATTAACATTACTACTAGTAAGTAGTATAGTAGAAAACGGAGCTGGAACAGGATGAACTGTTTACCCTCCTTTATCATCTAATATTGCCCATGGAGGAGCTTCTGTTGATTTAGCTATTTTCTC…
RRGCO316-15|Argyrotaenia	1289	763	594	781	80	1018	712	866	1015	129	732	326	472	428	275	61	112	104	263	248	264	AACATTATATTTTATTTTTGGTATTTGAGCTGGAATAGTAGGAACTTCATTAAGACTATTAATTCGAGCTGAATTAGGAAATCCCGGATCATTAATTGGAGATGATCAAATTTATAATACTATTGTCACTGCACATGCTTTCATTATAATTTTTTTTATGGTAATGCCTATTATAATTGGCGGATTTGGAAATTGATTAGTACCCTTAATATTAGGAGCCCCTGATATAGCTTTTCCACGAATAAATAATATAAGATTTTGATTATTACCTCCCTCTATTATATTATTAATTTCGAGTAGAATTGTAGAAAATGGAGCAGGAACTGGATGAACAGTTTATCCCCCACTTTCATCAAATATTGCCCATAGCGGAAGATCTGTAGATCTTGCTATTTTTTC…
RRSSC1911-15|Ectemnius	0	1489	4	10	115	1783	915	1447	1381	0	1845	37	20	526	384	177	803	79	59	0	0	AACCTTATACTTTATTTTTGGTACTTGAGCCGGAATAGTGGGAACTTCATTAAGACTTATTATTCGAGCAGAACTTGGTCACCCAGGAACCTTAATTGGAGATGATCAAATTTATAATGTTATTGTAACAGCTCATGCTTTTGTAATAATTTTTTTCATGGTAATACCAATTATAATTGGAGGATTTGGTAACTGATTAGTTCCTCTTATACTAGGAGCTCCAGATATAGCTTTCCCACGAATAAATAATATAAGATTTTGGATATTACCTCCTTCTCTAACTTTATTATTAGCAAGTAGAATAGTGGAAACTGGGGCAGGTACTGGTTGAACCGTTTACCCCCCACTATCTTCAGGGATTGCTCATATAGGAGCTTCTGTTGATTTAGCAATTTTTTC…
RRSSA2306-15|Pimpla	803	983	2579	228	1174	220	431	443	548	13	405	411	318	252	218	299	703	584	189	83	106	AACATTATATTTTTTATTAGGATTTTGATCAGGAATATTAGGACTATCATTTAGAATACTAATTCGAACAGAACTAGGAATACCAGGATCTATAATTGGTGATGACCAAATTTATAATGTAATTGTTACATCACATGCATTCTTAATAATTTTCTTTATAGTAATACCTATTATAATTGGGGGATTCGGTAATTGATTAATTCCATTAATATTAGGAGCCCCAGATATAGCATTCCCACGATTAAATAACATAAGATTTTGATTTCTACCCCCCTCATTATTACTATTATTATCAAGAAGAATAGTAAACTCAGGATCAGGAACTGGATGAACTGTTTATCCACCTCTATCAAGAAGAATCTCCCATTCAGGAGCATCTGTAGATTTAACAATTTTTTC…
RRGCO088-15|Acrobasis	4	1300	213	622	105	1749	443	755	928	114	1680	143	141	841	468	124	201	201	150	103	127	AACTTTATATTTTATTTTTGGAATTTGAGCAGGTATAGTAGGAACTTCTCTTAGATTATTAATTCGAGCAGAATTAGGAACTCCTGGATCATTAATTGGAGATGATCAAATTTATAATACTATTGTAACAGCTCATGCTTTTATTATAATTTTTTTTATAGTTATACCTATTATAATCGGAGGATTTGGTAATTGATTAGTTCCCTTAATATTAGGAGCCCCAGATATAGCCTTTCCTCGAATAAATAATATAAGTTTTTGACTTCTACCACCTTCACTTACTCTTTTAATTTCTAGAAGAATTGTAGAAAATGGAGCAGGAACAGGATGAACTGTTTATCCCCCCCTTTCATCAAATATTGCTCATAGAGGAAGATCAGTAGATTTAGCTATTTTTTC…
RRSSC1944-15|Acrotomus	1330	678	59	637	1522	308	486	552	653	60	596	364	512	303	261	597	561	105	218	106	187	AACATTATATTTTATTTTCGGAGCATGAGCAGGAATAATTGGAACTTCATTAAGTATTTTAATTCGAGCTGAATTAGGACATCCAGGAGCACTTATCGGAAATGATCAAATTTATAATGTAATTGTAACAGCTCATGCATTTATTATAATTTTTTTTATAGTAATACCAATTATAATTGGAGGATTTGGAAATTGATTAGTTCCTTTAATATTAGGAGCTCCTGATATAGCTTTTCCACGAATAAATAATATAAGTTTTTGACTTTTACCTCCTGCTTTAACTCTATTATTAGTAAGTAGTATAGTAGAAAACGGAGCTGGAACAGGATGAACTGTTTATCCTCCATTATCTTCAAATATTGCTCATGGTGGAGCTTCTGTAGATTTAGCAATTTTTTC…
RRMFE2511-15|Podisus	4423	1014	350	3576	115	1006	510	552	676	35	298	332	104	517	198	50	59	0	69	56	38	TACTTTATATTTTATTTTTGGTGCATGATCTGGTATAGTAGGAACTTCATTAAGAATTTTAATTCGAGCAGAATTAGGACACCCTGGTGCATTAATTGGTGACGACCAAATTTATAATGTAATTGTTACAGCTCATGCTTTTATTATAATTTTCTTTATAGTTATACCTATTATAATTGGAGGATTTGGTAATTGACTAGTTCCATTAATATTAGGAGCTCCAGATATAGCCTTTCCTCGAATAAATAATATAAGTTTCTGATTACTACCTCCTGCTTTAACCCTTCTTCTTGTAAGTAGTGTAGTTGAAAAGGGAGCTGGTACTGGATGAACTGTTTACCCACCCCTATCATCTAATATCGCTCATGGAGGAGCCTCAGTAGATTTAGCTATTTTTTC…
RRGCO562-15|Sparganothis	1419	1514	1	208	844	975	786	998	1165	26	321	120	40	390	285	356	841	398	139	35	33	AACTTTATATTTTATTTTTGGAATCTGAGCAGGAATAGTAGGGACATCTTTAAGTTTATTAATTCGAGCTGAATTAGGTAATCCAGGATCATTAATTGGAGATGATCAAATTTATAATACTATTGTTACAGCTCATGCTTTTATTATAATTTTTTTTATAGTTATACCAATTATAATTGGTGGATTTGGAAATTGATTAGTACCATTAATACTGGGGGCACCTGATATGGCTTTCCCACGAATAAATAATATAAGATTTTGATTATTACCACCTTCCTTAACCCTTTTAATTTCAAGAAGAATTGTTGAAAATGGAGCTGGAACAGGATGAACAGTATACCCCCCACTCTCATCTAACATTGCTCATGGTGGTAGATCTGTAGATTTAGCAATTTTTTC…
RRSSC7811-15|Nehalennia	0	517	0	25	3211	40	249	244	118	12	325	458	552	258	254	913	937	786	93	13	3	AACATTATATTTTTTATTTGGAACTTGAGCTGGGATAGTAGGAACTTCTTTAAGAATTTTAATTCGTGCAGAACTTGGTCATCCAGGAGCTTTAATTGGAGATGATCAAATTTATAATGTAATTGTTACAGCTCATGCTTTTGTTATAATTTTTTTTATAGTAATACCAATTATAATTGGAGGATTTGGAAATTGATTAGTTCCCCTAATACTAGGAGCTCCAGATATAGCATTTCCTCGAATAAATAATATAAGTTTTTGACTATTACCTCCTTCTTTAACTTTATTACTAATAAGTAGTATAGTTGAAAATGGGGCTGGAACAGGATGAACAGTTTATCCTCCTCTTTCTTCTAGAATTGCTCATAGAGGAGCTTCTGTTGATTTAGCAATTTTTTC…
RRMFC2013-15|Platycheirus	1135	841	914	299	80	281	545	526	701	12	1692	541	113	382	246	21	158	790	361	194	152	TACTTTATACTTTATTTTTGGAGCTTGATCAGGAATGATCGGAACTTCATTAAGAATTTTAATTCGAGCCGAACTAGGACACCCTGGAGCATTAATTGGTGATGACCAAATCTATAATGTAATTGTTACAGCTCATGCTTTTATTATAATTTTTTTTATAGTAATACCAATTATAATTGGAGGATTTGGTAATTGATTAGTCCCTTTAATGTTAGGAGCCCCAGATATAGCTTTCCCTCGGATAAACAATATAAGTTTCTGACTTTTACCTCCTGCATTAACTTTACTATTAGTAAGTAGTATAGTGGAAAACGGAGCTGGAACAGGATGAACTGTTTACCCACCTTTATCATCTAATATCGCTCATGGAGGAGCTTCTGTTGATTTAGCTATTTTTTC…
RRMPE028-15|Cryptomeigenia	557	805	289	124	617	338	378	222	423	403	1567	512	677	180	195	507	446	207	401	167	113	AACACTATATTTTCTTTTTGGGGCCTGAGCTGGAATACTTGGAACTTCTTTAAGATTATTAATTCGAGCCGAATTAGGAAATCCTGGTTCTCTAATTGGCAATGATCAAATTTACAACGTTATTGTTACAGCACATGCTTTCATTATAATTTTCTTCATAGTTATACCAATTATAATTGGGGGATTTGGTAATTGACTTGTCCCCCTTATATTAGGAGCACCTGATATAGCTTTTCCACGAATAAACAATATAAGATTTTGATTTTTACCCCCATCTCTTTCTCTTTTATTAATAAGAAGAATTGTAGAAAATGGGGCAGGTACAGGTTGAACAGTATATCCTCCTCTTTCAGCTAATATTGCCCATAGAGGATCATCTGTTGATTTAGCAATTTTTAG…
RRSSC6176-15|Agapostemon	0	1234	72	694	1705	53	399	542	778	0	3	135	390	744	447	351	1187	178	261	105	46	AACTTTATATTTTTTATTTGGAACATGAGCAGGAATAGTAGGAACATCTCTAAGAATTTTAATTCGAGCAGAATTAGGTCATCCTGGAGCCCTAATTGGTGACGATCAAATTTATAATGTAATTGTTACTGCTCATGCCTTCGTAATAATTTTTTTTATAGTAATACCAATTATAATTGGAGGATTTGGAAATTGATTAGTTCCATTAATATTAGGAGCCCCTGATATAGCTTTTCCTCGAATAAATAATATAAGTTTCTGATTATTACCTCCTTCTTTAACTTTATTATTAGTAAGAAGAATAGTAGAAAATGGAGCTGGGACAGGATGAACAGTTTATCCACCTTTATCTGCTAATATTGCTCATAGTGGAGCTTCTGTTGATTTAGCAATTTTTTC…
RRMPE003-15|Neoclytus	196	766	229	736	856	450	512	398	118	42	909	971	144	628	428	22	231	732	289	99	281	TACTTTATATTTTATCTTAGGTGCTTGATCTGGAATAATTGGTACTTCATTAAGTATTTTAATTCGAGCTGAATTAGGACATCCTGGAGCATTAATTGGAGATGATCAAATTTATAATGTAATTGTAACAGCTCATGCTTTTATTATAATTTTTTTTATAGTTATACCAATTATAATTGGTGGATTTGGAAACTGATTAGTCCCATTAATATTAGGAGCACCAGATATAGCTTTTCCACGAATAAATAATATAAGTTTCTGATTATTACCTCCTGCATTAACTTTATTATTAGTGAGTAGTATAGTAGAAAATGGTTCTGGTACAGGATGAACAGTTTATCCTCCTTTATCTTCTAATATTGCTCATGGAGGAGCTTCTGTAGATTTAGCTATTTTTTC…
RRGCO623-15|Xanthorhoe	8249	552	267	1055	235	1073	254	426	498	305	209	47	2	611	157	59	260	29	27	70	93	AACATTATATTTTATTTTTGGACTTTGAGCTGGAATAATTGGTACATCTTTAAGATTAATAATTCGATTAGAATTAGGAACACCATCTTCAATTATTAATAATGATCAATTTTATAATTCAATTATTACAGCCCATGCTTTAGTAATAATTTTTTTTATAGTTATACCATTTATAATTGGAGGTTTTGGAAATTGATTAATTCCTATAATACTTGGAGCCCCTGATATAGCTTTCCCACGAATAAATAATATAAGATTTTGACTTTTACCACCCTCATTATTTTTGCTTATTATAAGAAACATAATAAAAATAGGAGTAGGAACAGGATGAACTTTATACCCACCTTTATCTTCAAATATTGGACATAATTCACCTTCTGTTGATTTATCAATTTTTTC…
RRMFD011-15|Forficula	2350	692	0	221	64	147	343	310	390	21	1523	172	3	1078	1445	604	174	20	451	18	7	AACATTATATTTTATATTTGGATCGTGGGCTGGAATAGTAGGAACTTCATTAAGATTATTAATTCGAGCCGAACTAGGTAACCCGGGAACTTTAATTGGGGATGATCAAATTTATAACGTTATTGTTACAGCTCATGCTTTCATTATAATTTTTTTTATGGTTATACCGATTTTAATTGGGGGATTTGGGAACTGATTGGTTCCTTTAATATTAGGGGCCCCTGATATAGCCTTCCCACGTATAAATAATATAAGATTTTGATTACTGCCTCCTTCTTTAACCTTATTATTAATAAGAAGAATAGTAGAAAGAGGGGCAGGAACCGGATGAACTGTTTATCCTCCTTTATCTTCTAATATTGCTCATAGGGGGGCTTCAGTTGATTTAGCTATTTTTAG…
RRSSC4775-15|Cuerna	202	147	1322	67	123	692	868	853	1171	152	1582	513	0	428	256	31	181	864	194	32	30	AACTTTATATTTTATTTTTGGAGCATGATCAGGAATAATTGGTACTTCCTTAAGAATTTTGATTCGTACTGAATTAGGTCATTCTGGTTCTTTAATTGGAAATGATCAAATTTATAATGTAATTGTTACAGCTCATGCTTTTGTAATAATTTTTTTTATAGTAATACCTATTATAATTGGAGGATTTGGAAATTGATTAGTTCCATTAATATTAGGAGCTCCAGATATAGCTTTTCCACGAATAAATAATATAAGTTTTTGATTACTTCCTCCTGCTTTAATTCTTTTATCTTCGAGAGGAATAATAGATAATGGAGCTGGTACTGGTTGAACTGTTTACCCTCCTTTATCTTCTCTTATTTCTCATGATGGATCTTCTGTAGATTTAGCAATTTTTTC…
RRMFG2308-15|Pedilus	46	481	1	1	2364	231	559	630	572	0	355	356	559	323	277	374	698	593	258	1	62	AACGTTGTACTTTTTATTTGGAAGATGAGCTGGAATAGTAGGAACCTCACTAAGAATTTTAATTCGGGCCGAATTAGGAAATCCAGGTAGATTAATTGGTGATGATCAAATTTATAATGTTATTGTTACAGCCCATGCATTCGTAATGATTTTTTTCATAGTAATGCCTATTTTAATTGGAGGCTTTGGAAATTGACTAGTACCCCTCATACTAGGAGCTCCTGACATAGCCTTCCCTCGAATAAACAACATAAGATTCTGATTATTACCTCCTTCTCTAACATTACTTCTAAGCAGAAGATTAGTAGAAAGAGGAGCAGGAACTGGTTGAACAGTTTATCCCCCTCTTTCAGCAAATATTGCCCATAGAGGAGCATCAGTTGATTTGGCCATTTTCAG…
RRMFG2636-15|Tetanocera	1466	354	66	1733	39	671	482	565	356	592	244	470	10	363	431	72	87	370	266	227	265	AACTTTATATTTCATTTTTGGTATTTGGGCAGGAATAGTAGGAACTTCTTTAAGATTATTAATTCGAGCTGAATTAGGAAATCCGGGATATTTAATTGGGGATGATCAAATTTATAATACTATTGTTACAGCTCATGCTTTTATCATAATTTTTTTTATAGTTATACCTATTATAATTGGGGGATTTGGTAATTGATTAGTACCTCTAATATTAGGAGCCCCAGATATGGCTTTCCCACGAATAAATAATATAAGATTTTGATTATTACCCCCCTCCCTTTCCCTTTTAATTTCAAGAAGAATTGTTGAAAATGGGGCAGGAACTGGATGAACAGTATATCCACCCCTCTCCTCTAACATCGCTCATGGGGGAAGATCAGTTGATTTAGCTATTTTCTC…
RRSSA3962-15|Oxyporus	491	2638	0	0	587	661	1030	1045	884	0	124	37	448	999	742	76	208	12	140	0	0	AACGTTATATTTTATTTTCGGAGCTTGATCAGGAATGGTCGGCACTTCTCTTAGATTACTAATTCGAGCTGAGTTGGGTAACCCCGGCTCATTAATCGGTGACGATCAAATTTATAATACCATCGTAACGGCCCACGCCTTCATTATAATTTTCTTTATGGTCATGCCTATTATAGTAGGAGGATTTGGCAATTGATTAGTGCCCTTAATACTTGGCGCCCCAGATATGGCCTTCCCCCGAATAAACAACATAAGATTTTGATTACTCCCCCCATCTCTCTCTCTCTTACTTATAAGAAGAGTGGTAGAAAGGGGGGCAGGAACTGGATGAACCGTTTATCCCCCCCTATCATCCAACATTGCCCATGGAGGATCCTCAGTCGATTTAGCTATTTTCAG…
RRGCO428-15|Metzneria	1278	2023	295	300	55	764	577	756	1011	504	762	174	293	572	345	41	126	64	162	58	72	AACGTTATATTTCATTTTTGGTATTTGAGCAGGTATAGTTGGAACTTCTTTAAGATTATTAATTCGAGCAGAACTAGGAAACCCCGGATCATTAATTGGTGATGATCAAATTTATAATACTATTGTAACAGCTCATGCATTTATTATAATTTTTTTTATAGTAATACCTATTATAATTGGAGGATTTGGTAATTGATTAGTACCTTTAATATTAGGAGCCCCAGATATAGCTTTCCCACGAATAAATAATATAAGTTTTTGATTACTACCCCCCTCTATTATACTTTTAATCTCAAGAAGAATTGTTGAAAATGGAGCAGGAACAGGATGAACGGTTTACCCCCCCCTTTCATCTAATATTGCCCATAGCGGAAGTTCTGTTGATTTAGCTATTTTCTC…
RRGCO600-15|Scopula	898	1116	638	181	76	153	526	545	564	163	1962	444	118	242	176	45	112	597	261	124	158	AACATTATATTTTATTTTTGGAATTTGAGCTGGTATAGTTGGTACTTCATTAAGACTATTAATTCGAGCTGAATTAGGAAATCCAGGATCTTTAATTGGAGATGACCAAATTTATAATACTATTGTCACAGCTCATGCTTTTATTATAATTTTTTTTATAGTTATACCTATTATAATTGGAGGATTTGGTAATTGACTTGTACCTTTAATATTAGGAGCCCCAGATATAGCATTTCCTCGAATAAATAATATAAGTTTTTGACTTCTCCCACCCTCATTAACTTTATTAATTTCAAGAAGAATTGTAGAAAGTGGAGCAGGAACAGGATGAACAGTTTATCCACCCCTTTCATCTAATATTGCCCATGGAGGAAGATCTGTTGATTTAGCTATTTTTTC…
RRMPC946-15|Cheumatopsyche	653	2507	76	163	272	640	561	681	753	205	939	74	8	497	226	80	109	504	316	90	55	AACTCTTTATTTTTTATTTGGGATCTGATCAGGTATAGTAGGTATAATATTAAGAATAATTATTCGAATTGAATTAGCTCAGCCAGGACCATTTTTAATAAATGATCAACTTTATAATGTAATTGTAACTTCACATGCTTTTATTATGATTTTTTTTATGGTTATACCAATCATAATTGGTGGATTTGGGAATTGATTATTACCTTTAATAATTGGTGCACCAGATATAGCATTTCCTCGTATAAATAATATAAGATTTTGATTACTACCTCCATCACTATGTTTATTATTAGTTAGATCTATAGTTGAAATAGGAGTTGGAACCGGTTGAACAGTTTATCCTCCTTTATCGTCAAATGTTGCACATTCTGGTCCTAGAGTTGATTTAGCAATTTTTTC…
RRSSC2097-15|Lejops	1360	2095	123	625	59	605	661	612	876	69	1536	372	376	266	135	30	71	92	51	85	70	TATTTTATATTTTTTGTTTGGGATATGAGCGGGGATAATTGGTATATCAATGAGTTTAATTATTCGTTTAGAGTTAGGAGTGTGTGGGAGAATGTTGGGGAATGAACAAATTTATAATGGTATAGTAACTTTACATGCGTTTGTAATAATTTTTTTTATAGTAATACCTATTATAATTGGGGGGTTTGGTAATTGATTAATCCCTTTAATATTAGGGGCTCCTGACATAGCTTTTCCTCGTATGAATAATATGAGGTTTTGATTATTGATTCCTTCATTGTTATTATTATTGATTAGAGGTTTAATTAATGTAGGGGTAGGGACTGGATGAACAATATATCCTCCTTTATCTTCTTTAATAGGGCATAGAGGTATATCAGTTGATTTATCTATTTTTTC…
RRGCO802-15|Phryganea	2159	763	10	1331	310	631	728	775	1059	63	28	343	316	399	254	110	82	16	171	67	97	TACTTTATATTTTATTTTTGGAGCTTGATCAGGAATAATTGGTACTTCATTAAGTATTTTAATTCGTACTGAATTAGGCCATCCTGGTTCATTAATTGGAAATGATCAAATCTATAATGTTATTGTAACAGCTCACGCTTTTATTATAATTTTTTTTATAGTAATACCTATTATAATTGGAGGATTTGGAAATTGATTAGTGCCACTAATATTAGGAGCCCCAGATATAGCATTTCCACGAATAAATAATATAAGTTTTTGACTTCTCCCTCCCTCATTAACTCTTCTATTAATAAGTAGTATAGTAGAAAACGGAACTGGTACAGGTTGAACAGTTTACCCACCCCTGTCATCTATCATTGCTCATAGAGGTGCTTCTGTTGATTTAGCAATTTTTTC…
RRSSC4113-15|Sphecodes	0	758	717	343	1184	79	301	304	218	0	0	231	385	422	199	723	1124	133	246	54	36	AACATTATATTTTATCTTCGGGGCATGAGCCGGAATAGTAGGAACTTCTTTGAGAATTTTAGTTCGAGCTGAATTAGGGCACCCCGGAGCTTTAATTGGAGATGACCAAATCTATAATGTAATTGTTACTGCTCACGCATTTATTATAATTTTCTTTATAGTAATACCCATTATAATTGGGGGATTTGGTAATTGATTAGTCCCTCTAATATTAGGGGCCCCTGATATGGCTTTCCCACGAATAAATAATATAAGTTTTTGAATACTTCCCCCCTCTTTATCTCTTCTATTAACTAGTTCAATAGTTGAAAATGGAGCAGGAACAGGATGAACAGTTTACCCCCCTCTTTCAGCAAGAATTGCCCACGGTGGGGCATCTGTCGATTTAGCTATCTTCTC…
RRGCO746-15|Thyraylia	2178	519	313	754	103	1117	364	652	530	133	496	100	279	429	273	45	116	97	122	146	186	AACGTTATATTTTATTTTTGGTGTTTGAGCTGGAATAATTGGTACTTCCTTAAGATTATTAATTCGAGCAGAATTAGGAAATCCTGGCTCATTAATTGGAGATGATCAAATTTATAATACTATTGTAACTGCCCATGCTTTTATTATAATTTTTTTTATAGTTATACCCATTATAATTGGTGGTTTTGGTAATTGATTAGTACCATTAATATTAGGAGCTCCTGATATAGCTTTCCCACGAATAAATAACATAAGATTTTGATTATTACCCCCCTCCATCATATTATTAATCTCAAGCAGAATTGTAGAAAATGGAGCAGGAACAGGATGAACAGTTTATCCCCCACTTTCATCAAATATTGCCCATAGTGGCAGATCTGTAGATCTTGCTATTTTTTC…
RRSSC2088-15|Metrioptera	2669	1151	27	468	257	432	796	713	645	9	1260	39	139	555	344	0	145	17	52	0	3	AACTTTATATTTTATATTTGGATCTTGATCTGGAATAGTAGGAACATCTCTAAGAATTTTAATTCGATCAGAATTAGGTCATCCTGGAGCTTTAATTGGCGATGATCAAATTTATAATGTAATTGTAACAGCTCATGCCTTTGTAATAATTTTTTTTATAGTAATGCCTATTATAATTGGAGGATTTGGTAACTGATTAGTTCCATTAATATTAGGAGCTCCAGATATAGCATTTCCACGAATAAATAATATAAGTTTTTGATTATTACCCCCATCATTGACCCTATTAATAGCAAGAATAATAGTTGAAAACGGATCTGGTACAGGATGAACGATTTACCCACCTTTATCTTCAGCTATTGCACATGGCGGATCTTCTGTAGATCTTACAATTTTCTC…
RRSSA263-15|Hydropsyche	0	435	5634	61	134	212	197	206	179	21	475	0	0	337	183	52	98	339	133	78	60	TACTTTATATTTTATTTTCGGAGCATGAGCTGGAATGGTGGGTACTTCATTAAGAATGCTAATTCGAGCTGAACTAGGGCATCCAGGAGCTTTAATTGGAGATGATCAAATTTATAATGTAATTGTTACAGCACATGCCTTTGTAATAATTTTTTTTATAGTAATACCCATTATAATTGGAGGATTTGGTAACTGATTAGTTCCTTTAATGTTAGGGGCCCCAGATATAGCATTTCCACGAATAAATAATATAAGATTTTGATTACTACCCCCATCTTTAACCCTATTATTAGCAAGAAGTATAGTAGAAAATGGAGCAGGAACTGGTTGAACAGTATACCCCCCGCTATCTGCCAGAATTGCGCATGCTGGAGCTTCTGTTGACTTAGCAATTTTTTC…
RRSSC3242-15|Chilacis	3	207	1978	4	906	339	607	612	504	37	497	221	0	387	284	74	490	409	161	29	23	TACATTATATTTTCTATTTGGAGCTTGAGCTGGAATAGTAGGAACATCTTTAAGTATTTTAATTCGTGCAGAACTTGGTCATCCAGGAGCATTAATTGGTGATGATCAAATTTATAATGTAATTGTTACTGCTCATGCATTTGTAATAATTTTTTTTATAGTAATACCTATTATAATTGGTGGATTTGGTAATTGATTAGTTCCTTTAATATTAGGAGCTCCTGATATAGCATTTCCTCGAATAAATAATATAAGTTTTTGATTATTACCCCCTTCATTAACACTACTTTTAGTAAGTAGTATAGTTGAAAATGGGGCTGGAACTGGATGAACAGTTTATCCTCCTCTTTCTGCTAGAATTGCACATGGAGGAGCATCAGTTGATTTAGCAATTTTTTC…
RRSSC1952-15|Limnephilus	8	1666	62	755	570	382	692	474	586	17	15	265	374	513	371	304	328	98	128	48	56	TACTTTATATTTTATTTTTGGAATTTGAAGAGGAATAGTAGGAACATCTTTAAGACTTCTAATTCGTGCTGAATTAGGAAATCCAGGATCATTAATTGGAGATGATCAAATTTATAATACAATTGTAACAGCTCATGCATTTATTATAATTTTTTTTATAGTTATACCTATTATAATTGGAGGATTTGGAAATTGATTAGTCCCTCTTATATTAGGAGCTCCTGATATAGCATTCCCACGAATAAATAATATAAGATTTTGATTATTACCCCCATCATTAACTCTTTTAATTTCAAGAAGAATTGTTGAAAATGGAGCAGGAACTGGGTGAACAGTTTATCCCCCCCTTTCATCAAATATTGCTCATGGTGGTAGATCAGTTGATTTAGCAATTTTTTC…
RRGCO243-15|Aglossa	1822	132	443	1014	202	918	133	269	355	393	899	76	103	446	330	174	396	64	27	45	57	AACTTTATATTTTATTTTTGGAATTTGAGCTGGAATAATTGGAACATCTTTAAGATTACTAATTCGAGCTGAATTAGGAAATCCCGGATCTTTAATTGGAGATGATCAAATTTATAATACTATTGTAACAGCACATGCCTTTATTATAATTTTTTTTATAGTTATACCTATTATAATTGGAGGATTTGGAAATTGATTAGTCCCATTAATATTAGGAGCCCCAGATATAGCATTTCCCCGAATAAATAATATAAGATTTTGATTACTCCCCCCTTCAATCACTCTTTTAATTTCAAGAAGAATTGTAGAAAATGGAGCTGGGACTGGTTGGACAGTTTACCCCCCTTTATCCTCTAATATTGCCCACGGAGGAAGATCTGTAGATTTAGCTATTTTCTC…
RRGCO574-15|Adaina	1287	150	0	715	733	471	174	193	252	981	539	231	219	428	308	221	297	64	68	68	75	AACTTTATATTTTATTTTCGGAATTTGAGCTGGTATAGTAGGAACATCATTAAGTTTAATAATTCGTGCTGAATTAGGTAACCCTGGATCACTAATTGGTGACGATCAAATTTATAATACTATTGTAACGGCTCATGCTTTCATTATAATTTTTTTTATGGTAATACCAATTATAATTGGAGGATTTGGTAATTGATTAGTTCCTTTAATGTTAGGAGCTCCTGATATAGCTTTCCCTCGAATAAATAATATAAGATTCTGATTACTTCCTCCATCAATTACATTATTAATTTCAAGAAGAATTGTTGAAAATGGAGCAGGAACTGGATGAACAGTTTACCCCCCCTTATCCTCAAATATTGCTCATGGAGGAAGATCTGTAGATTTAGCTATTTTCTC…
RRGCO742-15|Etainia	498	202	1267	178	206	919	304	341	527	26	334	247	249	276	331	217	442	106	164	84	126	AACATTATATTTTATTTTTGGGATTTGAGCTGGAATAGTAGGAACTTCTCTAAGATTATTAATTCGAGCTGAATTAGGAAACCCTGGATCATTAATTGGAGATGATCAAATTTATAATACTATTGTTACTGCTCATGCTTTTATTATAATTTTTTTTATAGTAATACCAATTATAATTGGAGGATTTGGAAATTGATTAGTACCATTAATATTAGGAGCCCCAGATATAGCTTTTCCACGTATAAATAATATAAGATTTTGATTACTTCCCCCCTCTATTATATTATTAATTTCAAGAAGAATTGTAGAAAATGGAGCAGGAACAGGATGAACAGTTTACCCCCCACTTTCATCTAATATTGCTCATAGAGGAAGATCAGTAGATTTAGCTATTTTTTC…
RRMFE3104-15|Cryptomeigenia	729	14	274	109	132	384	329	213	408	289	1391	413	580	154	130	339	395	279	226	52	43	AACATTATATTTTATTTTTGGAGCTTGAGCCGGAATAGTTGGAACTTCTCTAAGTATACTAATTCGAGCTGAATTAGGTCATCCTGGTGCCTTAATTGGTGATGATCAAATTTATAATGTTATTGTAACAGCTCATGCTTTTGTTATAATTTTTTTTATAGTAATACCTATTATAATTGGAGGATTTGGAAATTGATTAGTTCCTTTAATATTAGGAGCCCCAGATATAGCCTTTCCTCGAATAAATAATATAAGATTTTGACTACTGCCCCCTTCTTTAACATTATTACTAGCTAGAAGTCTGGTAGAAAACGGAGCTGGGACTGGGTGAACTGTTTATCCTCCTTTATCGGCTGGAATTGCACATGCGGGAGCATCAGTTGATTTAGCTATTTTTTC…
RRSSA4300-15|Botanophila	384	586	44	417	179	284	401	399	349	7	199	528	367	442	376	159	238	692	342	83	58	TCTACTTTATTTTATCTTTGGATTATGATCAGGAATAATTGGATCTGCTTTAAGAATAATTATTCGATTAGAACTTGGAATACCAGGAAAACTTATTAATAATGATCAAATTTATAATACTATTGTAACCTCCCATGCATTTATTATAATTTTTTTTATAGTTATGCCATTTATAATTGGAGGATTTGGTAATTGATTAATTCCCCTAATACTTGCAGCTCCTGATATAGCTTTTCCACGTATAAATAATATAAGATTTTGACTTTTACCTCCTTCTTTATTTATACTATTGATAAGTAATATCATTGGTAGAGGAGTAGGTACTGGATGAACCTTATACCCTCCTTTATCTTCAATTTTAGGTCATAATTCTCCATCAGTTGATTTAAGTATCTTTTC…
RRSSA2278-15|Neoalosterna	255	1022	0	1346	14	659	466	462	486	1177	110	567	106	337	236	39	44	0	24	94	63	AACTTTATACTTCATTTTCGGAGCATGATCTGGAATAATTGGTACTTCACTAAGTATTTTAATTCGAACTGAATTAGGACATCCAGGTTCATTAATTGGTGATGATCAAATTTATAATGTAATTGTTACAGCACATGCATTTATTATAATTTTTTTTATAGTAATACCAATTATAATTGGAGGATTCGGAAATTGATTAGTTCCTTTAATATTAGGAGCTCCAGATATAGCATTCCCACGAATAAACAATATAAGTTTTTGACTACTTCCCCCTTCATTAACGCTTTTATTAGCAAGTAGTATAGTAGAAAACGGAGCTGGGACAGGATGAACAGTTTACCCACCTTTATCTTCAGTGATTGCTCATGGAGGAGCTTCTGTAGATTTAGCAATTTTTTC…
RRSSC4823-15|Boettcheria	5	765	60	411	195	794	661	593	710	237	5	1252	19	540	403	13	175	7	17	17	118	AACATTATATTTTTTATTTGGAACTTGAGCCGGAATAGTAGGAACTTCTTTAAGAGTTTTAATTCGTGCAGAACTTGGTCATCCAGGAGCTTTAATTGGTGATGATCAAATTTATAATGTAATTGTTACTGCTCATGCTTTTGTTATAATTTTTTTTATAGTAATACCAATTATAATTGGAGGATTTGGTAATTGATTAGTGCCCTTAATATTAGGAGCTCCAGATATAGCTTTTCCTCGAATAAATAATATAAGTTTTTGATTATTACCTCCTTCTTTAACATTATTATTAATAAGCAGAATAGTAGAAAATGGGGCTGGAACAGGATGAACAGTTTACCCTCCCCTTTCTGCAAGAATTGCTCATAGAGGAGCTTCTGTTGATTTAGCAATTTTTTC…
RRSSA262-15|Cheumatopsyche	1191	1084	623	123	158	363	136	213	137	1994	806	2	0	344	226	25	96	281	14	25	16	AACTTTATATTTCATTTTTGGTGCTTGATCAGGAATAATTGGAACTTCAATAAGAATTTTAATTCGTTCAGAATTAGGAAATCCAGGTTCACTAATTGGAGATGATCAAATTTATAATGTAATTGTTACAGCTCACGCTTTTATTATAATTTTTTTTATAGTTATACCTATTATAATAGGAGGATTTGGAAATTGATTAGTACCTCTTATACTAGGAGCTCCAGATATAGCTTTCCCTCGAATAAATAATATAAGATTTTGACTACTCCCCCCTTCACTTTCTTTATTATTAATAAGAAGATTTGTTGAAAATGGGGCAGGAACTGGATGAACTGTTTACCCCCCTTTATCATCTAATATTGCTCATAATGGACCTTCAGTAGATTTAACTATTTTTAG…
RRMFE3134-15|Bibio	955	1222	1	4	146	592	628	522	632	0	161	228	285	310	342	54	214	606	243	3	123	AACTTTATATTTTATCTTCGGAATTTGATCAGGAATAATTGGAACTTCCTTAAGAATCCTAATTCGAACAGAACTAGGACATCCAGGAGCATTAATTGGAGATGATCAAATTTATAATGTAATTGTAACAGCTCATGCTTTTATTATAATTTTCTTTATAATTATACCAATTATAATTGGAGGATTTGGAAATTGATTAGTCCCTTTAATATTAGGAGCTCCAGATATAGCATTCCCCCGAATAAATAATATAAGTTTTTGATTGTTACCACCAGCATTAACTTTATTATTAGTGAGTAGTATAGTAGAAAACGGAGCTGGGACAGGATGAACTGTTTACCCTCCCCTATCCTCTAATATTGCTCATGGAGGAGCTTCTGTTGATTTAGCTATTTTTTC…
RRSSC4998-15|Lasioglossum	0	500	40	2633	65	510	281	406	319	0	4	279	227	710	342	56	92	0	89	137	190	AACATTATATTTTATTTTTGGTATTTGAGCCGGAATAGTAGGAACCTCTTTAAGATTACTTATTCGAGCTGAATTAGGTAATCCTGGTTCCTTAATTGGAGATGATCAAATTTATAATACTATTGTCACAGCTCATGCTTTCATTATAATTTTTTTTATAGTTATACCTATTATAATTGGAGGATTTGGAAATTGACTTGTACCTTTAATATTAGGGGCCCCAGATATAGCTTTTCCTCGAATAAATAATATAAGTTTTTGACTTCTTCCCCCCTCTTTAACTTTATTAATTTCAAGTAGAATTGTAGAAAATGGGGCAGGAACAGGATGAACAGTTTATCCCCCACTTTCTTCTAACATTGCTCATGGCGGAAGATCTGTTGATTTAGCTATTTTTTC…
RRSSC6131-15|Coccinella	0	1434	601	229	367	611	449	411	557	31	548	137	372	379	231	44	133	64	245	73	50	AACATTATACTTCATTTTTGGTATTTGAGCTGGAATAGTTGGAACTTCTCTAAGTTTATTAATTCGAGCTGAATTAGGTAATCCAGGATCATTAATTGGGGATGACCAAATTTATAATACAATTGTAACAGCACATGCTTTTATTATAATTTTTTTTATGGTTATACCAATTATAATTGGGGGATTTGGTAATTGATTGGTTCCACTAATATTGGGAGCACCTGATATAGCTTTTCCCCGTATAAATAATATAAGATTTTGATTATTACCACCATCAATCACTCTTTTAATTTCTAGAAGAATTGTAGAAAATGGAGCAGGAACAGGATGAACTGTTTACCCTCCTTTATCTTCAAATATTGCTCATGGGGGAAGTTCGGTAGATTTAGCTATTTTTTC…
RRGCO736-15|Endothenia	1424	198	1222	799	436	200	334	315	447	31	206	134	170	131	203	184	310	246	116	65	71	AACATTATATTTTATTTTTGGTATTTGAGCTGGAATAGTAGGAACTTCTTTAAGATTATTAATTCGAGCTGAATTAGGAAATCCTGGCTCATTAATTGGAGATGACCAAATTTATAATACTATTGTAACGGCTCATGCTTTTATTATAATTTTTTTTATAGTTATACCTATTATAATTGGAGGATTCGGAAATTGATTAGTACCTTTAATATTAGGAGCTCCTGATATAGCTTTCCCACGAATAAATAATATAAGTTTTTGACTTTTACCACCTTCTTTAACATTATTAATTTCAAGAAGAATTGTAGAAAATGGAGCAGGAACAGGATGAACAGTTTACCCCCCACTTTCATCTAATATTGCACATGGTGGTAGATCAGTTGATTTAGCAATTTTTTC…
RRGCO738-15|Eucosma	254	1822	2	568	75	241	557	611	380	136	493	188	143	391	202	35	77	44	195	119	81	AACATTATACTTTATTTTTGGAATTTGAGCAGGTATAGTAGGAACTTCCCTAAGATTATTAATTCGAGCTGAATTAGGAAATCCTGGATCATTAATTGGAAGAGATCAAATTTATAATACAATTGTAACTGCACATGCTTTTATTATAATTTTTTTTATAGTCATACCTATTATAATCGGAGGATTTGGAAATTGACTAGTACCATTAATATTAGGAGCTCCTGATATAGCTTTTCCCCGAATAAATAATATAAGATTTTGATTATTACCCCCATCACTAATTCTTCTAATTTCAAGAAGTATTGTAGATAATGGAGCCGGTACTGGATGAACGGTTTACCCCCCCCTTTCTTCCAATATTGCTCATAGAGGTAGATCAGTTGATTTAGCAATTTTCTC…
RRGCO757-15|Phyllonorycter	223	531	678	13	245	167	288	287	313	7	557	57	231	286	270	325	518	106	183	90	157	AACATTATATTTTATTTTTGGAATTTGAGCAGGTATAGTAGGAACTTCTCTAAGATTGTTAATTCGAGCAGAATTAGGAAATCCTGGATCTTTAATTGGAGATGATCAAATTTATAATACTATTGTTACAGCACATGCTTTTATTATAATTTTTTTTATAGTTATACCAATTATAATTGGAGGATTTGGAAATTGATTAGTTCCATTAATATTAGGAGCTCCAGATATAGCATTTCCTCGAATAAATAATATAAGATTTTGACTTCTACCCCCATCATTAACTTTATTAATTTCGAGAAGAATTGTAGAAAATGGAGCAGGAACCGGATGAACAGTATATCCTCCACTATCTTCTAATATTGCTCACGGTGGAAGTTCAGTAGATTTAGCAATTTTTTC…
RRSSC7841-15|Rhipidia	347	619	579	202	101	306	361	287	336	490	301	358	322	193	214	327	213	93	69	79	85	AACCTTATATTTTATTTTTGGTGCTTGATCTGGTATAGTAGGAACATCCCTGAGACTATTAATTCGAGCTGAATTAGGTCAACCAGGTGCTTTAATTGGTGACGATCAAATTTTTAATGTTATTGTAACAGCTCATGCTTTTGTCATAATTTTCTTTATAGTTATGCCAATTTTAATTGGAGGATTTGGAAATTGATTAGTGCCCCTAATATTGGGAGCTCCTGATATAGCTTTTCCTCGAATAAATAATATGAGATTCTGACTTTTACCTCCTTCTTTAACTTTATTACTTACTAGCTCTTTAGTTGAAAACGGAGCTGGGACAGGTTGAACTGTCTACCCCCCTCTATCTTCAACTATTGCTCATGCTGGGGCTTCAGTAGACTTAGCTATTTTTTC…
RRMFE2524-15|Cyrtolobus	1	1379	159	359	258	4	122	107	10	2193	188	0	5	227	134	0	81	725	140	3	1	AATTTTATATTTTATTTTTGGCATATGAGCAGGTATAATTGGATCATCAATAAGAATTATCATTCGAATAGAATTAGGTAATCCTGGATTCTTAATTAATAATGATCAAATTTATAATTCTATTGTCACAGCCCATGCATTTATTATAATCTTCTTCATAGTAATACCCATTATAATTGGTGGTTTTGGTAATTGATTAATTCCTTTAATAATTGGCGCACCTGATATAGCTTTCCCACGAATAAATAATATAAGATTCTGACTATTACCCCCATCTTTATTATTATTATTACTTAGAAGAATTATTAATCAAGGAATTGGTACAGGATGAACTGCCTATCCACCATTATCATTAAATATAAATCATGAAGGAATATCAATAGATATAGGAATTTTTTC…
RRSSC1991-15|Megisto	1143	1253	243	120	111	533	442	508	569	35	159	21	3	406	310	49	240	328	190	45	22	TACTTTATATTTTATTTTTGGTGCATGATCAGGAATAGTAGGGACTTCATTAAGTATATTAATTCGAGCTGAATTAGGAAATCCTGGATCATTAATTGGTGACGATCAAATTTATAATGTTATTGTTACTGCTCATGCATTTGTTATAATTTTCTTTATAGTAATACCTATTATAATTGGAGGGTTTGGGAATTGACTAGTTCCATTAATATTAGGAGCTCCTGATATGGCTTTTCCTCGAATAAATAATATAAGATTTTGACTTTTACCTCCATCTTTATCATTACTGTTAATAAGTTCTTTAGTTGAAAGAGGTGCTGGTACTGGATGAACAGTGTACCCTCCTTTATCTTCAGGTATTGCCCATAGAGGAGCTTCTGTAGATCTAGCAATTTTTAG…
RRSSC6593-15|Quedius	2934	242	0	68	80	89	416	363	270	2	165	268	0	175	190	88	142	578	265	26	175	AACTTTATATTTCATTTTTGGAGCTTGATCCGGAATAATTGGAACTTCATTAAGAATTTTAATTCGAACTGAATTAGGACACCCAGGAGCTTTAATTGGAGATGACCAAATTTATAATGTAATTGTAACAGCTCATGCTTTTATTATAATTTTTTTTATAGTTATACCTATTATAATTGGTGGATTTGGAAATTGATTAGTACCCCTAATACTAGGAGCTCCAGATATAGCATTCCCTCGAATAAATAATATAAGATTTTGACTTTTACCCCCCGCTTTAATTCTATTATTATTTAGTAGAATAGTAGAAAATGGGGCTGGAACAGGATGAACTGTTTATCCACCTCTATCTTCTAATATTGCTCATAGAGGAGCTTCCGTTGATTTAGCTATTTTTTC…
RRSSC1975-15|Odontomyia	1101	614	240	214	66	567	209	409	307	115	590	253	109	267	180	22	160	214	101	104	128	AACATTATACTTTATTTTTGGGGCTTGAGCAGGAATAGTAGGAACTTCTTTAAGAATTTTAATTCGAGCAGAATTAGGGCACCCTGGAGCATTAATTGGTGACGATCAAATTTATAATGTGATTGTTACAGCTCATGCATTTATTATAATTTTTTTTATAGTTATACCTATTATAATTGGAGGGTTTGGAAATTGATTAGTTCCTTTAATATTAGGAGCTCCTGATATAGCCTTTCCTCGAATAAATAATATGAGATTCTGAATATTACCTCCATCTATTACTTTATTGGTATCTAGAAGTTTAGTTGAAACAGGAGCAGGAACAGGTTGAACAGTATATCCCCCACTTTCATCTGGAATTGCTCATGCTGGAGCATCTGTAGATTTAGCAATTTTCTC…
RRSSA4315-15|Donacia	0	778	1940	126	355	162	246	193	305	177	603	4	189	125	165	184	273	76	115	52	55	TACTTTATATTTTATTTTTGGGGCATGAGCAGGAATAGTTGGGACTTCTCTTAGATTACTAATTCGAGCCGAACTAGGACATCCTGGGGCTTTAATTGGAGATGATCAAATTTATAATGTTATTGTTACAGCTCATGCTTTTGTAATAATTTTTTTTATAGTAATACCCATTATAATTGGGGGATTTGGAAATTGACTTGTGCCTTTAATACTAGGAGCCCCAGATATAGCCTTCCCTCGAATAAATAATATAAGATTTTGATTATTACCCCCTTCATTAACTTTACTACTAGCAAGTAGTATAGTTGAAGCCGGGGCAGGAACTGGATGAACTGTTTACCCTCCTTTATCTGCTAATATTGCTCATGCTGGGGCATCAGTTGATTTAGCTATTTTTTC…
RRSSC4778-15|Draeculacephala	22	1003	841	76	127	381	215	164	142	424	729	201	314	271	222	137	360	121	63	16	7	GATCCTGTACATAATTTTTGCACTATGATCAGGAATAGTGGGATCAAGAATATCTATGATTATTCGTATAGAATTAAGTGTACCAGGTGCATGAATTAAAAATGATCAAATTTATAATTCAATTGTTACATCTCATGCATTTTTAATAATTTTTTTTTTAGTTATACCATTTATAATTGGGGGTTTTGGAAACTGATTAATACCATTAATAATTGGTGCACCTGATATAGCTTTCCCTCGAATAAATAATGTAAGATTTTGATTACTCCCTCCATCATTAATCTTACTATTATCAAGAAATTTAATCAACCCAAGACCAGGAACTGGTTGAACTGTATACCCTCCATTATCATTATATATATTTCACCCCTCACCTTCTGTTGATATAACAATTTTTTC…
RRGCO442-15|Rhopobota	570	651	0	271	95	366	383	383	628	38	233	96	155	425	299	183	415	18	102	69	62	CACCTTATATTTTATCTTTGGAGCATGGGCTGGTATAGTAGGAACTTCTATAAGAATAATTATTCGAGCAGAATTAGGTCAACCAGGATCTCTAATTGGGGATGATCAAATTTACAATGTAATTATTACAGCACACGCATTTGTAATAATTTTTTTTATAGTTATACCTATTATAATTGGAGGATTTGGTAATTGACTTGTACCACTAATAATTGGAGCACCAGATATAGCATTTCCACGAATAAATAATATAAGTTTTTGACTTTTACCACCATCATTAACCCTTTTACTTTCATCTTCTATAGTAGATAGTGGAGCTGGCACAGGATGGACAATTTACCCTCCGCTTGCTGGAGCAATTGCGCACGGAGGTGCATCAGTTGATTTAGCTATTTTCTC…
RRMFG2653-15|Synanthedon	883	604	94	147	37	468	849	795	1241	156	48	0	292	314	188	0	58	33	131	1	0	AACCTTATACTTTATTTTTGGCGCTTGGGCCGGAATAATTGGAACCTCTTTAAGAATTTTAATCCGAGCTGAATTGGGACACCCAGGAGCCTTGATTGGAAATGATCAAATCTATAATGTTATTGTAACAGCTCATGCCTTTGTAATAATTTTTTTTATAGTAATACCAATCATAATTGGAGGATTTGGAAATTGACTAGTTCCTCTAATATTAGGGGCCCCTGATATAGCATTCCCACGAATAAATAACATAAGCTTTTGACTTCTGCCCCCCTCATTAACTCTTTTACTAGCAAGTAGCTTAATCGAAAACGGGGCAGGAACAGGATGAACTGTTTACCCTCCCCTATCTTCTGGAATTGCCCACGCTGGAGCTTCTGTTGATTTAGCTATTTTTTC…
RRSSC7818-15|Pseudolimnophila	606	621	1417	246	26	194	355	306	323	3	653	136	378	127	146	13	89	37	194	33	47	AACTCTATATTTCATTTTTGGAGCCTGATCAGGAATAGTAGGAACTTCTTTAAGACTATTAATTCGATCTGAGTTAGGTACACCAGGAACATTAATTGGTAACGACCAAATTTATAATGTAATTGTTACTGCTCATGCATTTATTATAATTTTTTTTATAGTTATACCTATTATAATTGGAGGATTTGGTAATTGACTTGTTCCTTTAATATTAGGAGCTCCTGATATAGCTTTTCCTCGAATAAATAATATAAGATTTTGATTATTACCTCCTTCACTAACTTTACTTTTAATAAGAAGAATAGTAGAAAGAGGAGCTGGCACAGGATGAACTGTTTATCCCCCATTATCTTCTAATATTGCTCATGGAGGATCATCCGTAGATTTAGCTATTTTCAG…
RRMFE3097-15|Bibio	881	427	231	215	95	276	220	228	133	13	210	268	193	317	258	81	145	515	138	91	91	AATTTTATATTTTATTTTTGGAATATGATCAGGAATAATTGGATCATCAATAAGTATTATTATTCGAATAGAATTAAGAAATCCAGGATTTCTTATTAATAATGATCAAATTTATAATTCAATTATTACAACTCATGCCTTTATTATAATTTTTTTTATAGTTATACCAATTATAATTGGTGGATTTGGAAACTGATTAATTCCTTTAATAATAGGAGCCCCTGATATAGCATTTCCCCGAATAAATAATATAAGATTTTGACTTTTAATTCCTTCTATTATATTATTAATATTAAGATCAATTTCAAATCAAGGAACAGGAACAGGATGAACTATATATCCCCCCTTATCTTTAAATTTAAACCATGAAGGAATTTCAATTGATATATCAATTTTTTC…
RRSSA3940-15|Tiphiidae	0	166	0	587	78	157	32	62	47	3058	54	46	2	263	121	0	32	0	37	23	42	AACATTATATTTTATATTTGGAATTTGATCAGGAATAGTTGGTACATCACTAAGTTTACTAATTCGAATAGAATTAGGGAATCCAGGATCATTAATTGGTGATGATCAAATTTATAATACAATTGTAACTGCCCATGCTTTTATTATAATTTTTTTTATAGTAATACCAATTATAATTGGTGGATTTGGAAATTGATTAGTACCAATTATATTAGGAGCCCCAGATATAGCATTCCCACGATTAAATAATATAAGATTTTGATTACTACCCCCATCATTAACTTTATTAATTTCAAGAAGAATTGTAGAAACTGGAGTAGGAACAGGATGAACAGTTTACCCCCCTCTTTCTTCTAATATTGCCCACAGAGGAAGATCTGTAGATTTAGCAATTTTTTC…
RRSSC1990-15|Solva	604	1189	901	171	15	111	253	290	250	56	730	180	61	112	85	26	57	273	175	68	94	TATATTATATTTTATTTTTGCAATATGAGCTGGGATAATTGGAAGATCTATAAGTATAATTATTCGTACAGAATTAGGAACTCCTAATTCATTTATTAATAATGACCAAATTTACAATTCTTTAGTTACAACCCATGCATTTATCATAATTTTTTTTATAGTTATACCCTTTATAATTGGTGGATTTGGAAATTGATTAGTACCCCTTATATTAGGAGCCCCTGATATAGCGTTTCCGCGAATAAATAATATAAGATTTTGATTATTACCCCCCTCAATTTCTATAATATTAATTAGAAATTTAATTTATGATGGAATCGGAACAGGCTGAACAATTTACCCCCCCCTATCTTCAAACTTATTTCATAATGGACCTACTGTTGATCTTACAATTTTCTC…
RRGCO749-15|Dichomeris	302	651	536	196	285	518	356	432	488	36	74	187	162	150	136	183	321	45	81	49	62	AACACTTTATTTTATTTTTGGGGCTTGAGCTGGAATAATTGGAACATCACTAAGTATTTTAATTCGTGCTGAACTAGGTCACCCAGGAGCTTTAATTGGTGATGATCAAATTTATAATGTAATCGTTACTGCTCATGCATTCGTTATAATTTTCTTTATAGTTATACCTATTATAATTGGGGGATTTGGAAACTGACTTGTACCATTAATATTAGGAGCACCTGATATAGCATTCCCTCGAATAAATAATATAAGTTTTTGATTACTACCCCCTTCATTAACCCTTTTATTAGTTAGAAGTATAGTTGAAAACGGGGCTGGAACTGGTTGAACTGTTTACCCTCCACTATCTGCAGCTATTGCACATGGAGGAGGTTCCGTTGATTTAGCAATTTTCTC…
RRSSC6174-15|Eumenes	1220	1775	1723	149	116	20	173	226	104	0	0	155	42	111	77	18	94	209	94	58	91	TACATTATATTTTATTTTTGGAATTTGAGCAGGTATAGTAGGAACATCTTTAAGATTACTAATTCGTGCTGAATTAGGAAATCCTGGATCATTAATTGGCGATGATCAAATTTATAATACTATTGTAACAGCTCATGCTTTCATTATAATTTTTTTCATAGTTATACCTATTATAATTGGAGGATTTGGAAATTGATTAGTTCCTCTTATATTAGGAGCCCCAGATATAGCTTTCCCTCGAATAAATAATATAAGATTTTGACTTCTTCCTCCTTCTATTATACTTTTAATTTCAAGTAGAATTGTAGAAAATGGAGCAGGTACAGGATGAACAGTTTACCCCCCACTTTCATCTAATATTGCTCATAGAGGAAGATCAGTAGATTTAGCAATCTTTTC…
RRGCO589-15|Coleophora	507	380	0	246	87	608	306	416	432	698	144	74	189	423	168	31	68	41	98	43	51	AACATTATATTTCATTTTTGGAATTTGAGCAGGAATAGTAGGAACCTCATTAAGTTTACTAATTCGAGCAGAATTAGGAACTCCAGGATCTTTAATTGGAGATGATCAAATTTATAATACTATTGTTACAGCTCATGCCTTTATTATAATTTTTTTTATAGTTATACCAATCATAATTGGAGGTTTTGGTAATTGATTAATTCCTTTAATATTAGGAGCCCCCGATATAGCTTTCCCCCGAATAAATAATATAAGTTTTTGACTTTTACCCCCATCTTTAACTTTATTAATCTCAAGAAGAATTGTAGAAAATGGAGCAGGAACTGGGTGAACTGTTTATCCCCCCCTTTCATCTAATATTGCTCATGGTGGTAGTTCTGTTGATTTAGCTATTTTTTC…
RRMPA008-15|Cynomya	621	489	250	235	251	240	154	214	73	31	97	0	34	734	258	323	239	73	216	34	69	TATTTTATATTTTATTTTTGGATTATGATCAGGAATAATTGGGTCTTCAATAAGAATAATTATTCGAATAGAATTAGGTAACCCAGGTTATTTAATTAATAATGACCAAATTTATAATTCTATTGTTACAGCTCACGCTTTTATCATAATTTTTTTTATAGTTATACCAATTATAATTGGAGGATTTGGAAATTGGTTAATTCCTTTAATATTAGGAGCTCCAGATATAGCATTTCCTCGAATAAATAATATAAGATTTTGATTATTACCACCATCAATTTTTTTACTGATTAATAGAAGAATTATCAACCAAGGTACAGGAACAGGATGAACAGTTTATCCACCTTTATCAAATAACTTAAATCATGAAGGTATATCAGTTGATTTATCAATTTTTTC…
RRMFI4399-15|Symmorphus	0	354	761	547	296	72	230	153	327	0	0	219	297	205	147	264	460	7	42	65	94	AACTTTATACTTTATTTTTGGGGTATGGGCAGGAATAGTAGGAACTTCCCTCAGACTACTTATTCGAGCTGAATTAGGAAACCCTGGAACTTTAATTGGAGACGACCAAATTTACAATGTAATTGTTACAGCTCATGCATTTGTTATAATTTTCTTTATAGTTATACCCATTGTAATTGGAGGATTTGGAAATTGACTAGTACCCTTAATACTAGGCGCACCAGATATGGCCTTTCCTCGAATAAATAACATAAGATTTTGACTTTTACCCCCCTCTTTAACTCTCCTGCTTATAAGAAGAATAGCAGAAAGAGGTGCGGGTACTGGATGAACTGTTTACCCTCCTCTTTCAGCCAATGTAGCCCATAGAGGAACTTCTGTAGATTTAGCAATTTTTAG…
RRMPE009-15|Ophion	513	1243	6	758	58	323	241	295	269	42	523	79	78	581	306	22	82	0	42	18	25	AACTTTATATTTTATCTTTGGGGCCTGGGCCGGAATAGTCGGAACATCCCTAAGATTATTAATCCGATCTGAATTGGGAACTCCAGGATCTTTAATTGGAGATGACCAAATTTACAATGTAATTGTAACTGCTCATGCTTTTGTAATAATTTTCTTTATAGTAATACCCATTATAATTGGGGGATTTGGCAACTGATTAGTCCCCCTTATGCTAGGAGCCCCAGACATGGCATTCCCTCGAATAAATAACATAAGATTTTGATTGCTGCCCCCTTCCCTAACTTTACTAATTATAAGAAGAATTGTTGAAAGTGGGGCAGGAACAGGTTGAACAGTTTACCCTCCCCTTTCCTCAAATATTGCCCATGGTGGATCTTCAGTTGATTTAGCAATTTTCAG…
RRGCO094-15|Plutella	0	952	146	323	53	323	300	287	443	56	64	240	281	364	210	69	52	61	110	77	86	AACTTTATATTTTATTTTTGGTATTTGAGCTGGAACAGTTGGCACATCTCTAAGTCTATTAATTCGAGCTGAATTAGGAAATCCAGGATCTTTAATTGGTGATGATCAAATTTATAATACTATTGTAACAGCCCATGCTTTTATTATAATTTTTTTTATAGTAATACCTATTATAATTGGTGGATTTGGTAATTGATTAATTCCTTTAATACTAGGAGCTCCAGATATAGCATTCCCACGAATAAATAATATAAGATTTTGATTATTACCTCCTTCTTTAACCCTTTTAATTTCTAGAAGAATTGTAGAAAATGGAGCAGGAACTGGATGAACTGTGTACCCCCCACTTTCATCTAATATTGCTCACAGTGGGAGATCCGTTGATTTAGCTATTTTTTC…
RRMFE3036-15|Ophion	2	197	64	123	134	1670	118	177	142	33	69	116	147	628	298	39	114	16	55	25	69	AACTTTATATTTTATTTTTGGGGTTTGATCAGGAATAGTAGGAACATCATTAAGTTTATTAATTCGAGCAGAATTAGGTAACCCAGGATCTTTAATTGGAGATGATCAAATTTATAATACTATTGTAACAGCTCATGCTTTTATTATAATTTTTTTTATAGTAATGCCTATTATAATCGGGGGATTCGGAAACTGATTAGTCCCTTTAATACTAGGAGCCCCTGATATAGCTTTCCCACGAATAAATAATATAAGATTTTGACTTTTACCCCCATCTCTTACTCTATTAATTTCCAGAAGAATTGTAGAAAATGGAGCCGGAACAGGTTGAACTGTTTACCCCCCCTTATCCTCTAATATTGCCCATAGAGGAAGCTCTGTTGACTTAGCAATTTTTTC…
RRMFI4036-15|Paraphlepsius	0	493	1250	56	410	361	272	230	300	9	248	214	51	126	131	85	272	240	22	17	33	AACTTTATACTTTATTTTCGGTGCATGAGCAGGAACTGTAGGAACCTCGCTCAGAATTTTAATTCGTACAGAATTAGGAAACCCTGGATCTTTAATTGGAAACGATCAAATTTATAACGTGATTGTTACAGCACATGCTTTTGTCATAATTTTTTTTATAGTTATACCTATTATAATTGGTGGATTTGGAAATTGACTAGTGCCTCTAATATTGGGTGCTCCAGATATGGCTTTCCCTCGAATAAACAATATAAGATTTTGACTTTTACCACCGTCACTTTCACTACTTTTAATAAGTAGAATTGTTGAAAATGGAGCTGGGACAGGATGAACTGTCTATCCACCACTATCTGCAAATATCGCTCATAGTGGAGCTTCAGTCGATTTAGCTATTTTCAG…
RRSSC4776-15|Neocoelidia	1	1380	37	27	61	695	461	441	432	265	322	146	53	240	106	8	35	66	139	18	6	TACATTATATTTTATTTTTGGAATTTGAGCTGGAATAGTAGGAACATCTTTAAGATTATTAATTCGAGCTGAATTAGGAAATCCTGGATCTTTAATTGGAGATGATCAAATTTATAATACTATTGTAACAGCTCACGCTTTTATTATAATTTTTTTTATAGTTATACCTATTATAATTGGAGGATTTGGAAATTGATTAGTACCTTTAATATTAGGAGCTCCAGATATAGCTTTCCCACGTATAAATAACATAAGATTTTGACTTTTACCTCCTTCTATTATACTTTTAATTTCAAGAAGAATTGTAGAAAATGGAGCAGGTACAGGATGAACAGTTTACCCCCCACTTTCATCAAATATTGCTCATAGAGGAAGATCTGTAGATCTAGCAATTTTTTC…
RRMFE2517-15|Draeculacephala	69	464	932	128	83	268	138	149	112	529	434	15	1	26	126	319	264	224	45	20	10	AACTCTATACTTTATTTTTGGAATTTGATCAGGCATAATTGGAACTTCATTAAGAATATTAATTCGATCAGAACTAGGAAACCCTGGAACATTAATTGGAAATGACCAAATTTATAATGTAATCGTAACAGCCCATGCATTCATTATAATTTTTTTCATAGTAATACCAATTATAATTGGGGGATTTGGAAATTGACTAGTCCCATTAATATTAGGAGCCCCTGATATAGCCTTTCCTCGTCTTAATAACATAAGATTTTGATTATTACCACCTTCTTTAACATTACTTTTAATGAGAAGAATAGTAGAAAGAGGGGCTGGAACTGGATGAACTGTTTATCCTCCCCTTTCATCTAATATTGCCCATGGAGGTTCTTCTGTAGATTTAGCTATTTTCAG…
RRGCO086-15|Triaenodes	349	241	0	165	146	437	316	395	416	8	120	146	125	159	76	44	71	234	147	60	158	AACCTTATATTTTATTTTTGGGGCTTGATCTGGTATAGTAGGAACATCCCTGAGACTATTAATTCGAGCTGAATTAGGTCAACCAGGTGCTTTAATTGGTGACGATCAAATTTTTAATGTTATTGTAACAGCTCATGCTTTTGTCATAATTTTCTTTATAGTTATGCCAATTTTAATTGGAGGATTTGGAAATTGATTAGTACCCCTAATATTAGGGGCTCCTGATATAGCTTTTCCTCGAATAAATAATATGAGATTCTGACTTTTACCTCCTTCTTTAACTTTATTACTTACTAGTTCTTTAGTTGAAAACGGAGCTGGGACAGGTTGAACTGTCTACCCCCCTCTATCATCAACTATTGCTCATGCTGGTGCTTCAGTAGATTTAGCTATTTTTTC…
RRGCO721-15|Perispasta	144	218	387	97	34	195	218	216	209	9	260	205	234	214	235	157	215	381	88	29	39	AATTTTATACTTTATTTTCGGCTTATGAGCTGGCATATTAGGCTCATCCATAAGAATTATTATTCGTATAGAATTAGGAAATCCCGGCCTATTTATTAATAATGATCAAATTTATAATTCTATTGTTACTGCCCATGCCTTTATTATAATTTTTTTTATAGTTATACCCATCATAATTGGAGGATTTGGTAATTGATTAATCCCACTTATATTAGGAGCACCAGATATATCATTTCCTCGTATAAACAACATAAGATTTTGATTATTACCCCCATCACTATTTTTATTAATTAATAGAAATTTAATTAATCAAGGAGTAGGAACGGGCTGAACTATTTATCCCCCCTTATCATTAAATATTAATCATGAAGGGATATCAATAGATTTAACTATTTTTTC…
RRSSC6279-15|Lebia	542	757	1	95	184	432	241	345	356	3	168	279	154	125	44	19	97	331	159	35	15	TACTTTATATTTTATTTTTGGAATCTGAGCAGGAATAGTTGGAACTTCATTAAGTTTACTAATTCGAGCAGAATTAGGAAATCCTGGATCTTTAATTGGTGATGATCAAATTTATAATACTATTGTTACAGCTCATGCATTTATTATAATTTTTTTTATAGTAATACCTATTATAATTGGAGGATTTGGAAATTGATTAATCCCATTAATATTAGGAGCCCCAGATATAGCTTTCCCACGAATAAACAATATAAGTTTTTGACTTCTTCCCCCCTCTTTAACTCTACTTATTTCAAGTAGAATTGTAGAAAATGGAGCAGGAACAGGATGAACTGTGTACCCCCCACTTTCATCTAATATTGCCCATGGAGGTAGATCAGTAGATTTAGCTATTTTCTC…
RRMFA204-15|Calliphora	556	524	282	353	31	141	208	231	228	2	134	229	309	251	220	47	68	75	131	59	31	AACTTTATATTTTATCTTTGGAATTTGATCTGGAATAATTGGAACTTCTTTAAGTTTATTAATTCGAGCAGAATTAGGTAATCCTGGATCTTTAATTGGAAATGATCAAATTTATAATACTATTGTTACAGCTCATGCTTTTATTATAATTTTTTTTATAGTTATACCCATTATAATTGGAGGATTTGGAAATTGATTAGTACCATTAATATTAGGAGCTCCAGATATAGCATTTCCACGAATAAATAATATAAGATTTTGAATACTTCCACCTTCTTTAACTCTATTAATTTCAAGAAGAATCGTAGAAAATGGAGCTGGAACTGGATGAACTGTGTACCCCCCCCTTTCATCTAATATTGCTCATGGAGGAAGCTCTGTAGATCTTGCTATTTTTTC…
RRSSA267-15|Hemichroa	1550	279	405	27	56	130	168	251	279	1	333	83	0	186	129	172	444	65	46	17	13	AACATTATATTTTTTATTTGGAACATGAGCTGGTATAGTAGGAACATCTTTAAGAATTTTAATTCGTGCAGAATTAGGTCATCCAGGTGCTTTAATTGGTGATGATCAAATTTATAATGTAATTGTTACTGCACATGCTTTTGTTATAATTTTTTTTATAGTAATACCAATTATAATTGGAGGTTTTGGAAATTGACTAGTCCCTTTAATATTAGGAGCTCCTGATATAGCATTTCCTCGAATAAATAATATAAGTTTTTGATTATTACCTCCTTCATTAACATTATTACTAGTAAGTAGTATAGTAGAAAATGGAGCTGGAACAGGATGAACAGTTTACCCCCCTCTTTCATCTAGAATTGCTCATGGAGGAGCTTCAGTAGATTTAGCTATTTTTTC…
RRMFG2315-15|Analeptura	0	79	28	638	189	41	251	148	62	351	5	236	309	171	134	72	66	26	150	78	162	GACTTTATATTTTTTATTTGGAATATGAGCAGGAATAATTGGTACTTCTCTCAGTATTTTAATTCGATTAGAATTAGCTTCAACAGGAAGATTAATCGGAAACGACCAAATTTATAATGTAATTGTAACAGCCCATGCTTTTGTTATAATTTTCTTTATAGTTATACCTATTATAATTGGAGGATTTGGGAACTGACTTGTCCCTTTAATAATTGGGGCCCCTGATATAGCTTTCCCACGTTTAAATAATATAAGATTTTGGTTATTACCACCTTCTTTAACTCTTCTTTTATCTAGAATACTAGTTGAAATAGGAGCAGGAACTGGATGAACAGTTTATCCCCCCTTATCCTCTAATCTAGCTCATAATGGATCTTCTGTAGATTTAGTAATTTTTAG…
RRMFD544-15|Augochlora	0	805	120	131	171	522	411	369	471	1	129	79	94	129	51	76	125	21	11	10	4	AACATTATATTTTATTTTTGGAATTTGAGCTGGAATAGTAGGAACTTCCCTAAGATTATTAATTCGAGCTGAATTAGGAACTCCAGGATCATTAATTGGAGATGATCAAATTTATAATACAATTGTTACAGCCCATGCTTTTATTATAATTTTTTTTATAGTTATACCAATTATAATTGGAGGATTTGGAAATTGATTAGTACCTTTAATATTAGGAGCCCCAGACATAGCTTTCCCCCGAATAAATAATATAAGTTTTTGACTTCTCCCCCCATCATTAACTTTATTAATTTCAAGAAGAATTGTAGAAAATGGAGCAGGAACAGGATGAACAGTGTACCCCCCACTTTCATCTAACATTGCTCATGGAGGAAGTTCAGTTGATTTAGCTATTTTTTC…
RRGCO299-15|Athrips	23	1191	339	176	292	244	261	180	276	147	22	75	122	49	63	127	99	31	12	7	8	AATTTTATATTTTATATTTGGTCTTTGATCAGGTATAATTGGTTCAGCATTAAGAATAATTATTCGACTAGAATTAGGAACACCAGGAAAATTAATTGGTAATGATCAAATTTATAATACCTTAGTAACTGCTCATGCATTTATTATAATTTTCTTTATAGTTATACCTTTTATAATTGGAGGATTTGGAAATTGATTAGTTCCTTTAATATTAGCAGCTCCTGATATAGCTTTTCCTCGAATAAATAATATAAGATTTTGATTATTACCTCCATCTTTATTTTTTTTATTATTAAGAAATATTATTGGTACCGGAGTAGGAACTGGATGAACTCTATATCCACCTTTATCCTCTATTACAGGTCATAATTCTCCATCTGTTGATTTAGGAATTTTCTC…
RRGCO105-15|Leptocerus	6	278	174	113	10	615	233	315	417	173	51	116	116	133	105	6	72	4	9	52	52	AATTCTATACTTTATTTTTGGTATATGATCAGGCATAATAGGATCTTCATTAAGATTATTAATTCGAATAGAATTAGGTAATCCAGGTTATTTAATTAATAATGATCAACTATATAATTCTATTATTACATCGCATGCCTTTATTATAATTTTTTTCATGGTAATACCTATTATAATTGGCGGATTTGGAAATTGAATAATCCCATTAATACTTGGGGCCCCAGATATAGCCTTCCCCCGAATAAATAATATAAGATTTTGACTTTTACCTCCTTCTATTAATTTATTAATTTTAAGAAATATAACTAATCAAGGAGTAGGAACAGGATGAACAGTTTATCCACCTTTATCACTAAACTTAAATCATGAAGGAATAGCTTTAGATATAGCAATTTTCTC…
RRBPA101-15|Bathythrix	686	692	353	76	103	61	69	100	80	55	289	163	39	67	44	12	51	232	91	44	42	AACCTTATATTTCCTTTTTGGAGCTTGATCAGGTATACTAGGAACTTCCCTGAGTCTTCTAATTCGTGCAGAACTTGGAAGACCGGGATCCCTAATTGGGAATGACCAAATTTACAACGTAATTGTTACTGCCCACGCATTCATTATAATTTTTTTTATAGTTATGCCTATTATAATTGGGGGATTTGGAAACTGGCTAATTCCCTTAATGCTTGGAGCCCCTGACATAGCTTTCCCGCGTATAAACAACATAAGATTTTGATTTTTACCTCCCTCTTTAAGCCTACTTCTCATAAGAAGAATTGTAGAGAATGGAGCAGGAACAGGATGAACAGTCTACCCTCCTCTCTCAGCAAATATTGCTCATAGAGGTTCATCAGTAGACTTAGCAATTTTCAG…
RRGCO735-15|Ancylis	354	304	462	125	41	293	199	259	259	4	229	49	38	53	64	83	172	86	34	15	15	AACATTATATTTTATTTTTGGAATTTGAGCTGGAATAGTTGGAACTTCATTAAGACTTTTAATTCGAGCTGAATTAGGAAACCCAGGGTCTTTAATTGGAGATGATCAGATTTATAACACTATTGTTACTGCTCATGCATTTATTATAATTTTTTTTATAGTAATGCCTATTATAATTGGTGGATTTGGAAATTGATTAGTTCCATTAATATTAGGAGCCCCAGACATAGCATTCCCCCGAATAAATAATATAAGATTTTGATTATTACCTCCTTCTATTATACTATTAATTTCAAGTAGAATTGTAGAAAATGGAGCAGGTACTGGATGAACAGTTTATCCCCCACTTTCATCAAATATTGCTCATAGAGGCAGATCTGTAGATTTAGCTATTTTTTC…
RRGCO073-15|Oecetis	1	80	103	135	0	492	228	207	263	138	174	97	118	140	65	166	130	1	51	20	21	AACTTTATATTTTATTTTTGGAATTTGAGCAGGAACAGTAGGAACATCTTTAAGATTATTAATTCGAGCAGAATTAGGAAACCCAGGTTCTTTAATTGGAGATGATCAAATTTATAATACTATTGTTACAGCTCATGCTTTCATTATAATTTTTTTTATAGTTATACCAATTATAATTGGAGGTTTTGGAAATTGATTAGTTCCTTTAATATTAGGAGCTCCAGATATAGCTTTCCCTCGAATAAATAATATAAGATTTTGACTATTACCCCCGTCATTAACTTTACTAATCTCTAGAAGAATTGTAGAAAATGGAGCAGGAACAGGATGAACAGTTTACCCCCCACTTTCATCTAATATTGCCCATGGAGGAAGATCAGTAGATTTAGCAATTTTTTC…
RRMPG973-15|Strauzia	340	91	93	324	10	147	59	75	111	354	783	16	2	102	71	16	21	93	25	10	25	AACTTTATATTTCATTTTTGGAATCTGGTCAGGAATGTTAGGAATAATATTAAGTATAATTATTCGTATTGAGTTAGCCCAACCTGGATCATTTATTAATGATGATCAAACTTATAATGTAATTGTTACTTCACATGCTTTTATTATAATCTTCTTCATAGTAATACCAATCATGATTGGTGGATTCGGAAATTGACTATTACCTTTAATAATTGGAGCTCCTGACATAGCATTTCCCCGACTTAATAATATAAGATTTTGACTTTTACCTCCAGCACTTACACTTCTTCTTTCAAGTTCACTTGTTGAAATAGGTGTAGGTACTGGATGAACAGTGTACCCACCATTATCTAGAAATATTGCTCACTCAGGCCCAAGAGTTGACATATCAATTTTTTC…
RRGCO652-15|Orgyia	673	355	183	357	308	79	58	62	42	21	5	80	74	120	158	85	113	28	28	25	23	AACATTATATTTTATCTTTGGAATTTGAGCTGGAATAGTCGGAACTTCCTTAAGTCTATTAATTCGAGCTGAATTAGGTACCCCTGGATCTTTAATTGGAGACGATCAAATTTATAATACTATTGTAACAGCTCATGCTTTTATTATAATTTTTTTTATAGTAATACCAATTATAATTGGAGGATTTGGAAATTGATTAGTTCCTTTAATGTTAGGAGCTCCTGATATAGCTTTCCCTCGAATAAATAATATAAGATTTTGATTACTACCTCCCTCTATTACATTATTAATTTCCAGTAGAATTGTTGAAAATGGAGCTGGAACTGGATGAACTGTATACCCCCCTTTATCTTCTAATATTGCCCATGGAGGAAGTTCTGTCGATCTAGCTATCTTCTC…
RRMFI4174-15|Austrozele	111	384	0	103	1	637	268	409	494	1	302	15	27	63	9	0	1	23	17	6	6	AACCCTTTATTTCATATTTGGGGCATGAGCTGGAATAGTCGGAACATCCCTAAGAATTCTAATTCGAGCCGAACTAGGACACCCTGGTGCTTTAATTGGAGACGACCAAATTTACAATGTAATTGTCACAGCCCATGCATTTGTAATAATTTTTTTTATAGTGATACCTATTATAATCGGAGGATTTGGGAATTGACTGGTTCCTTTAATATTAGGGGCTCCTGATATGGCCTTTCCTCGAATAAATAATATAAGTTTTTGACTTCTCCCTCCATCATTAACCCTTTTATTAGTCAGTAGCCTAGTTGAAAATGGGGCTGGTACGGGCTGAACTGTTTACCCCCCCTTGTCTTCTGGCATCGCACATGGAGGAGCTTCAGTTGATTTAGCAATTTTCTC…
RRMFB1016-15|Agonopterix	492	246	0	261	0	165	59	172	137	44	217	73	37	236	83	20	60	10	56	42	44	GACATTATACTTTATTTTTGGAATCTGATCAGGAATAATAGGAATAATATTAAGAATAATTATTCGAATTGAACTAGCTCAACCAGGACCATTTTTAATAAATGATCAATTATATAATGTAATTGTAACATCACATGCATTTATTATAATTTTTTTTATAGTAATACCAATTATAATTGGGGGATTTGGTAACTGATTATTGCCCTTAATAATTGGAGCACCAGATATAGCATTCCCACGAATAAATAATATAAGATTCTGACTTTTACCACCATCACTAACACTTCTATTAGTTAGATCTATAGTAGAAATAGGAGCGGGAACTGGTTGAACAGTATACCCACCATTATCATCTAATGCAGCACATTCAGGACCTAGAGTTGACCTAGCAATTTTCTC…
RRGCO806-15|Ptilostomis	214	809	0	63	29	146	333	199	268	7	47	51	26	131	78	22	89	7	21	8	39	AACATTATATTTTATTTTTGGAATTTGAAGAGGAATAGTTGGAACATCTTTAAGTTTATTAATTCGAGCTGAATTAGGTAATCCTGGATCCTTAATTGGAGATGATCAAATTTATAATACAATTGTTACAGCCCATGCATTTATTATAATTTTTTTTATAGTTATACCTATTATAATTGGGGGGTTTGGGAATTGATTAGTCCCTCTTATATTAGGAGCCCCTGATATAGCATTTCCACGAATAAATAACATAAGATTTTGATTACTTCCACCTTCTTTAACTCTTCTAATTTCAAGAAGTATTGTAGAAAATGGAGCAGGAACTGGATGAACTGTTTATCCCCCTCTTTCATCAAACATTGCTCATGGAGGAAGATCAGTAGATTTAGCAATCTTTTC…
RRSSC6586-15|Poecilus	949	276	0	76	108	183	91	119	110	36	76	51	50	102	108	14	45	140	59	24	12	AATACTATATTTTATCTTCGCAATATGATCAGGAATAATTGGAGCTTCATTAAGTATAATCATTCGTATAGAATTAAGAGCCCCCGGAAAATGAATTAATAATGATCAAATTTATAACACTATTGTTACATCCCACGCTTTCATTATAATCTTTTTTATAGTTATACCATTTATAATTGGAGGATTTGGTAACTGATTAATTCCACTAATAATTGGAGCCCCTGATATGGCATTCCCTCGAATAAATAATATAAGATTCTGATTATTAATCCCATCACTTATTATACTTCTATTAAGATCAACTTTAACAGATGGATCAGGGACAGGATGAACTATCTACCCTCCTCTATCATCAATTATATACCATTCCTCTAATTCTGTTGACTTCACAATTTTTTC…
RRMFE3077-15|Osmia	0	212	0	314	14	211	84	133	169	23	12	23	7	544	153	8	153	11	5	7	28	AACTTTATACTTCATTTTTGGAGCATGATCTGGAATAATTGGTACTTCATTAAGTATTTTAATTCGAACTGAATTAGGACATCCAGGTTCATTAATTGGTGATGATCAAATTTATAATGTAATTGTTACAGCACATGCATTTATTATAATTTTTTTTATAGTAATACCTATTATAATTGGAGGATTTGGAAATTGATTAGTTCCTTTAATATTAGGAGCTCCAGATATAGCATTTCCACGAATAAACAATATAAGTTTTTGACTACTTCCTCCTTCATTAATACTTTTATTAGCAAATAGTATAGTAGAAAATGGAGCTGGGACAGGATGAACAGTTTACCCACCTTTATCTTCAGTGATTGCTCATGGAGGAGCTTCTGTAGATTTAGCAATTTTTTC…
RRGCO071-15|Oecetis	11	461	145	28	51	312	121	97	164	108	33	92	46	50	79	30	60	143	46	19	16	AACATTATATTTTATTTTTGGTATTTGAGCAGGAATAATTGGAACTTCATTAAGATTATTAATTCGAGCTGAATTAGGAAATCCCGGATCTTTAATTGGAGATGATCAAATTTATAATACTATTGTCACTGCACATGCTTTTATTATAATTTTTTTTATGGTAATACCAATTATAATTGGAGGATTTGGAAATTGATTAGTACCTTTAATATTAGGAGCACCAGATATAGCATTCCCACGAATAAACAATATAAGATTTTGATTATTACCTCCATCTATTATATTACTAATTTCAAGAAGAATTGTGGAAAATGGAGCAGGTACTGGATGAACAGTGTACCCCCCACTCTCATCTAATATTGCTCATAGAGGTAGATCTGTAGATTTAGCTATTTTTTC…
RRGCO128-15|Olethreutes	52	263	72	114	101	51	141	98	151	17	131	76	146	77	50	145	110	45	85	17	13	AACTTTATACTTTATTTTTGGAATTTGAGCAGGTATAATTGGCACTTCCTTAAGACTTTTAATTCGAGCTGAGTTAGGAAATCCTGGGTCTTTAATTGGAGATGACCAAATTTATAACACAATTGTTACAGCCCATGCCTTTATTATAATTTTTTTCATAGTTATACCCATTATAATTGGGGGATTTGGAAATTGATTAGTACCTTTAATACTTGGAGCCCCTGATATAGCATTCCCCCGAATAAATAATATAAGATTTTGACTTTTACCTCCTTCAATTACTTTATTAATCTCAAGTAGAATTGTAGAAAATGGAGCAGGAACTGGATGAACCGTTTACCCCCCTCTTTCCTCAAATATTGCCCATGGAGGTAGATCAGTAGACTTAGCTATTTTTTC…
RRMFI4186-15|Atanycolus	1	256	61	319	3	82	111	120	155	9	358	50	93	106	54	14	64	19	46	32	48	AACTTTATATTTTATCTTTGGGGCTTGAGCAGGTATAGTGGGAACATCTCTTAGTATTATTGTTCGAGCAGAATTAGGACACCCAGGCGCTCTAATTGGAGATGATCAAATTTATAATGTAGTAGTTACAGCCCACGCATTCGTTATAATTTTCTTTATAGTAATGCCAATTATAATTGGAGGATTTGGTAACTGATTAGTTCCCCTAATATTAGGAGCACCTGATATAGCTTTCCCCCGAATAAATAATATAAGATTCTGAATGTTACCTCCCTCTCTTACCCTTCTTTTAGCAAGTAGTATAGTAGAAAACGGAGCAGGAACAGGATGAACAGTTTATCCGCCCCTATCCGCAGGAATTGCTCACGGTGGTGCATCTGTAGATTTAGCAATTTTTTC…
RRMFC2061-15|Sapyga	0	18	379	693	58	42	15	26	52	876	1	1	0	1	7	10	56	2	2	1	4	AACATTATATTTTTTATTTGGAGCTTGAGCTGGATTAGTTGGTACTTCATTAAGTATTTTAATTCGTGCAGAACTTGGTCATCCGGGAGCATTAATTGGAGATGATCAAATTTATAATGTAATTGTAACTGCTCATGCATTTGTAATAATTTTTTTTATAGTTATACCAATTATAATTGGAGGATTTGGAAATTGATTAGTTCCATTAATATTAGGAGCCCCTGATATAGCATTTCCTCGAATAAATAATATAAGATTTTGATTATTACCACCTTCATTAACATTATTATTAGTAAGTAGAATAGTTGAAAATGGAGCAGGAACAGGTTGAACAGTTTATCCTCCTCTTTCAGCTAATATTGCTCATAGTGGAGCTTCAGTTGATTTAGCAATTTTTTC…
RRSSA2350-15|Badister	1251	140	0	20	32	163	78	96	140	2	167	96	50	145	74	26	18	36	56	1	2	AACATTATATTTTATTCTAGGAGCATGATCAGGAATAGTAGGAACTTCATTAAGTATTTTAATTCGAGCTGAATTAGGACACCCTGGAGCACTAATTGGAGATGATCAAATTTATAATGTTATTGTAACAGCACATGCTTTTATTATAATTTTTTTTATAGTAATACCTATTATAATTGGAGGATTTGGAAATTGATTAGTTCCTTTAATATTAGGAGCTCCTGATATAGCCTTTCCTCGAATAAATAATATAAGTTTCTGACTCTTACCTCCTGCATTAACTTTATTGTTAGTAAGTAGTATAGTAGAAAACGGAGCTGGAACAGGATGAACTGTTTACCCTCCTTTATCTTCTAATATTGCTCATGGTGGAGCTTCTGTCGATTTAGCTATTTTTTC…
RRSSC1919-15|Aritranis	9	858	11	0	70	10	310	287	218	6	4	17	0	51	34	0	58	117	49	11	22	TATACTTTACTTTATTTTTGCTATATGATCAGGAATAATTGGTGCATCACTAAGTATAATTATCCGTATAGAACTAGCAACTCCTGGAAGATGAATTAATAATGATCAAATTTATAATACTATTGTTACTGCCCATGCTTTTATTATAATTTTCTTTATAGTTATACCATTCATAATTGGAGGATTTGGAAATTGATTAGTACCCTTAATAATTGGAGCCCCAGATATAGCTTTCCCACGAATAAATAATATAAGATTTTGATTATTAATTCCTTCCTTATTACTACTATTAATAGGAAATACTTTAACTTCAGGTTCAGGAACAGGATGAACAATTTACCCTCCATTATCATCAATTATATTTCATTCATCTTTTTCAGTAGATTTTTCTATCTTCTC…
RRSSC3239-15|Nabis	3	72	1024	131	15	64	166	138	203	6	42	106	2	95	29	0	9	2	12	8	33	AACTTTGTATTTTATTTTTGGTGCGTGATCCGGGTCACTAGGGTTAGCCTTAAGCCTATTAATTCGAGCAGAATTAGGAACCCCAGGAACATTAATTGGGAATGACCAAATTTATAATGTTATTGTTACAGCTCATGCTTTTATTATAATTTTTTTTATAGTTATACCTATTATAATTGGAGGATTTGGGAACTGATTGGTTCCTCTAATATTGGGAGCCCCTGATATGGCTTTTCCACGAATAAACAATATAAGATTTTGATTTCTCCCCCCTTCTCTAATATTTTTATTAATAAGAAGAATAGTTGAAAGAGGGGCAGGAACAGGATGAACTGTTTACCCCCCTCTATCTGCTAATATTGCTCACAGAGGCCCCTCTGTTGATCTAGCTATTTTTAG…
RRSSC6514-15|Geocoridae	17	76	1035	495	9	57	81	70	66	3	31	0	60	54	75	5	14	4	11	9	4	TACTTTATATTTTATTTTTGGAATTTGAAGAGGAATAGTAGGAACTTCTTTAAGTTTACTAATTCGTGCTGAATTAGGTAATCCGGGATCTTTAATTGGAGATGATCAAATTTATAATACAATTGTTACAGCTCATGCATTTATTATAATTTTTTTTATAGTTATACCTATTATAATTGGAGGATTCGGAAATTGATTAGTGCCTCTTATATTAGGAGCCCCAGATATAGCTTTTCCACGAATAAATAATATAAGATTTTGATTATTACCCCCATCATTAACTCTTTTAATTTCAAGAAGAATTGTAGAAAATGGAGCTGGAACTGGATGAACTGTATATCCTCCTCTTTCATCTAATATTGCTCATGGGGGAAGATCAGTTGATTTAGCAATTTTTTC…
RRMFG2736-15|Taxonus	77	324	8	1	162	203	94	88	113	4	28	79	5	78	102	55	141	83	37	1	0	AACACTATACTTTATTTTTGGAGCCTGAGCAGGAATAGTAGGAACTTCTTTAAGAATAATAATTCGAGCAGAATTAGGACATCCTGGATCTTTAATTGGTGATGATCAAATTTATAATGTAATTGTTACTGCTCATGCATTTATTATAATTTTTTTTATAGTTATACCTATTATAATTGGTGGATTCGGAAATTGATTAGTTCCCCTAATATTAGGAGCCCCTGATATAGCTTTCCCTCGAATAAATAATATAAGTTTTTGGTTACTTCCACCTTCTTTGACCCTTCTATTAGCTAGTAGTGTAGTAGAAAATGGAGCTGGTACTGGATGAACAGTTTATCCCCCCCTTTCAGCTAGAATTGCTCATGGAGGAGCATCAGTAGATTTAGCTATTTTTTC…
RRMFB1090-15|Pegomya	55	129	116	89	109	44	63	52	76	0	58	44	69	61	37	108	114	154	34	6	19	AACCCTTTATTTTATTTTTGGAGCTTGGGCAGGAATAATAGGAACTTCCTTAAGTTTATTGATTCGTGCAGAATTAGGTAACCCTGGATCGTTAATTGGGGATGACCAAATTTACAATGTAATTGTCACAGCTCATGCCTTCGTAATAATTTTCTTCATAGTTATACCTATTTTAATTGGGGGTTTTGGAAATTGACTTGTTCCTCTTATATTAGGAGCCCCTGATATAGCTTTCCCCCGAATAAACAACATAAGATTTTGACTCCTTCCCCCTTCCCTATCCCTCTTAGTAATAAGAAGAATTGTAGAAACAGGAGCAGGAACAGGGTGAACTGTTTACCCACCCCTTTCATCAAATATTGCCCATAGAGGAGCTTCTGTTGATTTAGCTATTTTTAG…
RRGCO085-15|Ceraclea	6	142	47	326	12	118	44	84	130	218	8	46	2	89	43	3	26	58	0	21	52	AACTTTATATTTTATTTTCGGAGCATGAGCCGGAATAGTAGGAACTTCTTTAAGAATTCTTATTCGAGCTGAATTAGGTCACCCAGGAGCATTAATTGGAGATGATCAAATTTATAATGTAATTGTTACAGCTCATGCTTTTATTATAATTTTTTTTATAGTAATACCTATTATAATTGGAGGGTTTGGAAATTGACTGGTTCCTTTAATACTAGGAGCTCCTGATATAGCTTTCCCTCGAATAAATAATATAAGTTTTTGACTTTTACCTCCTGCATTAACTTTATTATTAGTAAGCAGTATAGTAGAAAACGGGGCTGGAACAGGATGAACTGTTTACCCACCCCTATCTTCAAATATTGCTCATGGGGGAGCTTCTGTTGATTTAGCAATTTTTTC…
RRSSC4121-15|Pachynematus	209	180	1	3	3	285	117	129	148	0	30	30	3	107	55	40	85	17	35	1	1	AACATTATATTTTATTTTAGGATTTTGATCAGGAATATTAGGATTATCATTTAGAATATTAATTCGAACAGAATTAGGTATACCAGGATCAATAATTGGAGATGATCAAATTTATAATGTGATTGTAACATCCCATGCATTTTTAATAATTTTTTTTATAGTTATACCAATTATAATTGGAGGATTTGGAAATTGATTAATCCCATTAATATTAGGAGCCCCAGATATGGCATTTCCACGATTAAATAATATAAGATTTTGATTTTTACCACCCTCATTAATTTTATTATTATCTAGAAGAATTGTAAATTCAGGATCAGGAACTGGATGAACTGTTTACCCTCCTCTATCTAGAAGAATTTCTCACTCAGGAGCATCAGTAGATTTAACTATTTTCTC…
RRGCO100-15|Plectrocnemia	370	111	0	44	43	178	71	71	102	67	46	52	10	65	46	5	52	57	32	8	19	GACATTATATTTCATTTTTGGAATTTGAGCCGGAATAATCGGAACTTCTTTAAGACTTTTAATTCGAGCTGAATTAGGAAACCCTGGGTCTTTAATTGGAGATGATCAAATTTATAATACTATCGTTACTGCCCATGCTTTTATTATAATTTTTTTTATAGTAATACCAATTATAATTGGGGGATTTGGAAATTGACTAGTTCCTTTAATATTAGGTGCTCCTGATATAGCATTCCCACGAATAAATAATATAAGATTTTGACTACTCCCCCCTTCAATTATACTTTTAATTTCGAGTAGTATTGTAGAAAATGGAGCTGGAACTGGATGAACAGTTTACCCCCCTCTATCTTCAAACATTGCTCACGGGGGAAGATCTGTAGATCTCGCAATTTTTTC…
RRMPA085-15|Nabis	8	174	550	72	19	75	134	105	92	0	124	31	9	39	21	0	9	6	12	1	25	AACTTTATATTTTATTTTTGGAGCATGATCTGGATCCTTAGGATTAGCTTTAAGACTTTTAATTCGAGCTGAATTAGGAACTCCGGGAACTTTAATTGGTAATGATCAAATTTATAATGTTATTGTTACTGCTCATGCTTTTATTATAATTTTCTTTATAGTTATACCTATTATAATTGGTGGGTTTGGAAATTGATTAGTGCCCCTAATACTAGGAGCCCCTGATATAGCCTTCCCACGAATAAATAATATAAGATTTTGATTCTTACCTCCTTCTCTAATATTTCTTTTAATAAGAAGAATAGTAGAAAGTGGGGCCGGAACAGGATGAACTGTCTACCCTCCTCTTTCTGCAAATATTGCTCATAGAGGACCCTCAGTTGATTTAGCTATTTTCAG…
RRMFC2075-15|Iseropus	246	180	30	41	45	170	78	93	134	6	32	30	29	68	71	45	78	5	12	8	5	AACATTATACTTTATTTTCGGTATTTGAGCTGGTATAATTGGAACTTCTTTAAGATTATTAATTCGAACTGAATTAGGAAATCCAGGATCCTTAATTGGAGACGATCAAATTTATAATACAATTGTAACTGCACATGCTTTTATTATAATTTTTTTCATAGTTATACCTATTATAATTGGAGGATTTGGTAATTGATTAGTACCATTAATATTAGGAGCCCCAGACATAGCATTCCCTCGAATAAATAACATAAGATTTTGACTTTTACCCCCCTCTATCATATTACTAATTTCAAGTAGAATCGTGGAAACCGGAGCAGGAACAGGATGAACAGTATACCCCCCACTGTCATCTAATATTGCCCATAGTGGAAGTTCTGTTGATTTAACTATTTTCTC…
RRGCO675-15|Plutella	192	172	38	476	24	95	44	56	93	6	56	29	23	48	41	8	25	57	14	14	6	AACATTATATTTTATTTTTGGTATTTGAGCTGGAATAGTAGGAACTTCTTTAAGATTATTAATTCGAGCAGAATTAGGAAATCCCGGATCATTAATTGGAGATGATCAAATTTATAATACTATTGTTACAGCACACGCTTTCATTATAATTTTTTTTATAGTTATACCTATTATAATTGGAGGATTTGGTAACTGACTTGTTCCTTTAATATTAGGAGCCCCAGATATGGCATTCCCCCGAATAAATAATATAAGTTTTTGACTCCTCCCCCCTTCTCTAACTCTTTTAATTTCAAGAAGAATTGTAGAAAATGGAGCAGGAACAGGATGAACAGTGTACCCCCCACTTTCATCTAATATTGCTCATGGAGGAAGATCAGTAGACCTTGCTATTTTTTC…
RRSSA3927-15|Digonogastra	0	116	55	247	1	107	65	72	155	1	74	27	46	78	19	7	73	2	10	33	34	TACATTATATTTTATTTTCGGAGCATGATCAGGTATAATTGGAACTTCTTTAAGTATTTTAATTCGAGCTGAATTAGGACATCCTGGAGCATTAATTGGTGATGATCAAATTTATAATGTTATTGTAACAGCTCATGCTTTTATTATAATTTTTTTTATAGTAATACCTATTATAATTGGAGGATTTGGAAACTGATTAGTTCCTTTAATACTTGGAGCTCCTGATATAGCTTTCCCTCGAATAAATAATATAAGTTTTTGACTTTTACCTCCTGCATTAACTTTATTGTTAGTAAGTAGTATAGTAGAAAATGGAGCTGGAACAGGATGAACTGTTTACCCACCTTTATCTTCTAATATTGCTCATGGTGGAGCTTCTGTAGATTTAGCTATTTTTTC…
RRGCO701-15|Wockia	230	249	6	16	41	50	86	113	163	2	132	31	55	41	44	34	41	56	23	1	0	AACTTTATATTTTATTTTTGGTATTTGAGCAGGAATAGTTGGAACTTCATTAAGATTACTAATTCGAGCTGAATTAGGAACCCCCGGATCTTTAATTGGAGATGACCAAATTTATAATACTATTGTGACAGCTCATGCATTTATTATAATTTTTTTTATAGTAATACCTATTATAATTGGAGGTTTTGGAAATTGACTTATTCCTTTAATATTAGGAGCTCCTGATATAGCTTTCCCACGAATAAATAATATAAGTTTTTGATTATTACCCCCATCATTAACTCTTTTAATTTCTAGAAGAATTGTAGAAAATGGTGCAGGAACAGGATGAACGGTTTACCCCCCCCTTTCATCTAATATTGCTCATGGAGGAAGATCAGTAGATTTAGCTATTTTCTC…
RRGCO733-15|Protoptila	45	64	0	20	110	69	46	62	89	10	26	56	41	91	22	61	31	18	48	14	26	AACATTATACTTTATTTTTGGAATCTGATCAGGAATAGTAGGAATAATATTAAGAATAATTATTCGAATTGAACTAGCTCAACCAGGACCATTTTTAACAAATGATCAATTATATAATGTAATTGTAACATCACATGCATTTATTATAATTTTTTTCATAGTAATACCAATTATAATTGGGGGATTTGGTAACTGATTATTGCCCTTAATAATTGGAGCACCAGATATAGCATTTCCGCGAATAAATAATATAAGATTCTGACTTTTACCACCTTCACTAACACTCCTATTAGTTAGATCTATGGTAGAAATAGGAGCGGGAACTGGTTGAACAGTATACCCACCATTATCATCTAATGCAGCACATTCAGGGCCTAGAGTTGACCTAGCAATTTTCTC…
RRMFE3052-15|Pleolophus	455	202	7	155	18	32	49	67	70	0	3	44	38	66	13	10	10	48	26	14	14	AACTTTATATTTTATTTTTGGAGCTTGATCAGGAATAATTGGAACTTCATTAAGAATTTTAATTCGTACTGAATTAGGACATCCTGGATCATTAATTGGAAATGATCAAATTTATAATGTTATTGTTACAGCTCATGCTTTTATTATAATTTTTTTTATAGTAATACCAATTATAATTGGAGGATTTGGTAATTGATTAGTTCCATTAATATTAGGAGCTCCAGATATAGCATTCCCACGAATAAATAATATAAGTTTTTGAATACTTCCTCCTGCTTTAACACTTTTGTTAGTGAGCAGAATAGTAGAAAATGGAGCTGGGACAGGTTGAACAGTTTACCCTCCTTTATCTTCTAATATTGCTCATGGTGGAGCTTCTGTAGATTTAGCAATTTTTTC…
RRMFE3144-15|Taxonus	0	155	0	0	82	23	53	88	87	0	71	51	1	50	27	34	94	140	34	0	7	AACACTTTATTTTATTTTTGGTTTTTGATCTGGTATAGTTGGAACTTCATTAAGAATATTGGTACGAACAGAATTAGGAAATCCAGGTTCCTTAATTGGTAATGACCAAATTTATAATGTTATTGTAACAGCTCATGCTTTTATTATAATTTTTTTTATAGTTATACCTATTATAATTGGAGGTTTTGGAAATTGGCTTGTTCCTTTAATATTAGGTGCACCTGATATGGCTTTTCCACGTTTAAATAATATAAGTTTTTGATTACTTCCTCCCTCAATTTTCTTTCTTATTATAAGAAGAATAGTTGAAATAGGTGCGGGAACCGGTTGAACAGTTTATCCTCCTCTATCATCTAATATTGCCCATAGAGGTTCATCAGTTGATTTAGCTATTTTTAG…
RRGCO706-15|Coleophora	83	105	5	85	105	92	48	64	75	85	31	37	21	52	42	52	48	12	18	6	3	AACTTTATATTTTATTTTTGGAATTTGAGCAGGTATAGTAGGAACTTCCTTAAGATTATTAATTCGAGCTGAATTAGGTAATCCAGGATCATTAATTGGAGATGATCAAATTTATAATACTATTGTTACAGCTCATGCTTTTATTATAATTTTTTTTATAGTAATACCTATTATAATTGGAGGTTTTGGTAATTGACTTGTACCTCTTATATTAGGAGCCCCTGATATAGCTTTCCCTCGAATAAATAATATAAGTTTTTGACTTCTCCCCCCATCTTTAACTTTATTAATTTCAAGAAGAATTGTAGAAAATGGAGCAGGAACAGGATGAACAGTTTACCCCCCACTTTCATCTAACATTGCCCATAGAGGAAGATCAGTTGATTTAGCTATTTTTTC…
RRMFI4183-15|Campodorus	1	14	1412	0	2	2	1	0	0	0	0	2	0	1	2	0	19	1	1	1	4	AATTCTTTATATAATATTTGCTTTATGATCTGGAATAATTGGTTCAGCAATAAGAATTATTATTCGAATAGAATTAAGTATTCCTGGATCATGAATTTCTAATGACCAAATCTATAATTCTTTAGTTACAGCTCATGCTTTTTTAATAATTTTTTTTCTTGTAATACCATTTTTAATTGGGGGATTTGGAAATTGATTAATTCCTTTAATATTAGGAATTCCAGATATAGCTTTTCCCCGAATAAATAATATTAGATTTTGACTTTTACCCCCATCTTTAATAATTTTACTTTTAAGAAATTTTTTAAATCCAAGACCAGGAACAGGATGAACTGTATATCCTCCTTTATCTTCAAATTTATACCATTCTTCACCCTCAGTAGATTTAGCAATTTTTTC…
RRGCO750-15|Isophrictis	113	60	16	108	43	115	31	38	37	10	50	15	20	64	58	32	84	6	4	7	13	AACTTTATATTTTATTTTTGGAATTTGAGCTGGTATAATTGGAACTTCCATAAGATTATTAATTCGAGCAGAATTGGGAAACCCAGGTTCATTAATTGGGAATGATCAAATTTATAATACCATTGTAACTGCTCACGCCTTTGTTATAATTTTTTTCATAGTTATACCAATTATAATTGGAGGATTTGGTAATTGATTAGTCCCCCTTATACTTGGAGCCCCTGATATAGCTTTCCCCCGAATAAATAACATAAGATTTTGACTTCTACCCCCCTCTTTAATTCTTTTAATTTCAAGAAGAATTGTAGAAAATGGAGCAGGAACTGGATGAACAGTTTACCCACCCCTCTCTTCCAATATCGCTCACGGGGGAAGATCAGTAGATTTAGCTATTTTCTC…
RRGCO758-15|Caloptilia	233	113	268	102	94	12	30	32	27	15	14	25	8	19	18	26	26	0	18	12	13	AACATTATATTTTATTTTTGGTATTTGATCTGGAATAGTAGGAACATCATTAAGATTATTAATTCGAGCTGAATTAGGTAACCCAGGCTCATTAATTGGGGATGATCAAATTTATAATACTATTGTAACTGCTCATGCTTTTATTATAATTTTTTTTATAGTAATACCAATTATAATTGGAGGATTTGGAAATTGATTAGTACCTTTAATATTAGGAGCTCCTGATATAGCTTTCCCACGAATAAATAATATAAGATTTTGATTACTACCCCCTTCTTTAACTCTATTAATTTCAAGAAGTATTGTAGAAACAGGAGCAGGAACAGGATGAACTGTTTACCCCCCTCTCTCTTCTAACATTGCTCATGGAGGAAGTTCAGTAGATTTAGCAATTTTTTC…
RRSSC1936-15|Vulgichneumon	14	0	102	221	0	62	66	73	125	0	2	28	24	42	22	18	37	8	12	10	4	AACATTATATTTTATTTTTGGAGCATGATCTGGTATAGTAGGAACATCTTTAAGAATTTTAATTCGAGCTGAATTAGGTCACCCTGGAGCATTAATTGGTGATGATCAAATTTATAATGTAATTGTTACTGCTCATGCATTTATTATAATTTTTTTTATAGTTATACCAATTATAATTGGAGGATTTGGAAATTGATTAGTTCCATTAATATTAGGAGCTCCAGATATAGCCTTCCCCCGAATAAATAATATAAGTTTTTGACTTTTACCTCCAGCTTTAACTTTACTACTAGCAAGTAGTATAGTTGAAAATGGAGCTGGAACAGGATGAACTGTATACCCTCCCCTATCTTCAGTCATCGCTCATGGAGGAGCATCTGTTGATTTAGCTATTTTTTC…
RRMPG969-15|Senotainia	28	109	0	16	35	45	69	82	159	0	31	64	60	73	41	6	12	2	23	0	0	AACTTTATATTTTATTTTTGGAGCTTGATCAGGAATAATTGGAACTTCATTAAGAATTTTAATCCGAACTGAACTTGGTCACCCTGGTGCCTTAATTGGTGATGATCAAATCTATAACGTAATTGTAACTGCACATGCATTTATTATAATTTTTTTTATAGTAATACCTATTATAATTGGAGGATTTGGAAACTGATTAGTTCCATTAATATTAGGAGCTCCAGATATAGCCTTTCCTCGAATAAACAATATAAGTTTTTGACTTTTACCTCCTGCTTTAATCCTATTATTAGCTAGTAGTATAATCGAAAATGGAGCTGGTACTGGATGAACAGTTTATCCTCCTTTATCATCTAATATTGCTCATAGAAGAGCTTCTGTTGATTTGGCTATTTTTTC…
RRSSA277-15|Agrothereutes	42	266	0	0	44	102	49	74	54	35	4	11	0	40	66	3	82	3	4	1	0	AACTTTATATTTTTTATTTGGTGCTTGAGCAGGAATAGTAGGAACATCATTAAGTATTTTAATTCGTGCAGAATTAGGACATCCTGGATCATTAATTGGTGATGATCAAATTTATAATGTAATTGTAACAGCTCATGCGTTTGTAATAATTTTTTTTATAGTTATACCAATTATAATTGGTGGATTTGGAAATTGATTAGTTCCATTAATATTAGGAGCTCCAGATATAGCATTTCCACGAATAAATAACATAAGTTTTTGGATACTACCCCCTTCATTATCCTTATTATTAGTTAGTAGTATAGTTGAAAACGGAGCTGGTACTGGATGAACAGTTTACCCACCCCTATCTTCTACCATTGCACATAGAGGAGCTTCTGTAGACTTAGCAATTTTTTC…
RRGCO280-15|Anacampsis	321	61	22	34	115	35	28	28	18	11	32	30	31	22	7	14	52	48	11	1	3	AACACTATATTTCCTATTAGGAAGATGATCAGGAATAGTAGGAACATCGTTAAGAATATTAATTCGAGCAGAATTAGGAAACCCTGGATCATTAATTGGTGATGACCAAATTTATAATGTTATTGTAACTGCCCATGCTTTTGTTATAATTTTTTTTATAGTTATACCTATTCTAATTGGAGGATTTGGTAATTGATTAGTACCCCTTATATTAGGAGCCCCTGATATAGCATTTCCTCGAATAAACAATATAAGATTTTGATTACTTCCTCCTTCCTTAACTTTATTATTATTAAGAAGAATAGTAGAAAGAGGGGCAGGAACTGGTTGAACCGTTTACCCACCTCTTTCAGCCAATATTGCTCATAGAGGAGCATCAGTTGATCTAGCAATCTTTAG…
RRSSC4127-15|Microrhopala	19	39	73	2	88	27	23	82	57	2	106	1	0	9	35	29	32	12	9	1	0	AACATTATATTTCATTTTTGGTGCATGAGCAAGAATAGTAGGGACCTCCTTAAGTATATTAATTCGATCAGAGCTAGGAAACCCAGGATCATTAATTGGAGATGACCAAATTTATAATGTTATTGTTACAGCCCACGCATTTATCATAATTTTCTTTATAGTTATACCAATCATAATTGGTGGATTCGGAAATTGACTTGTCCCATTAATACTGGGAGCCCCAGACATAGCCTTTCCACGAATAAATAATATAAGATTTTGACTTCTCCCCCCCTCCCTAGCATTATTGATTATAAGAAGAATTGTTGAAAATGGTGCAGGAACAGGATGAACAGTCTATCCCCCATTATCTGCAAATGTAGCCCATAGAGGATCCTCTGTAGACTTAGCAATTTTTAG…
RRMFC2055-15|Nomada	0	109	0	26	1	63	27	68	79	5	167	0	2	26	11	1	29	10	9	2	3	AACTCTTTATTTTATTTTCGGAATTTGATCAGGATTAGTTGGATCTTCTTTAAGATTCCTTATTCGAATTGAACTTAGAACTCCAGGGTCTTTAATTGGAAACGACCAAATTTATAATGTAATTGTCACTTCTCATGCATTTATTATAATTTTCTTTATAGTTATACCTATTATAATCGGAGGATTTGGAAACTGATTAGTTCCTTTAATATTAGGATCCCCAGATATAGCTTTTCCTCGAATAAATAATTTAAGATTCTGATTTTTACCTCCTTCATTACTTCTTTTAATTTTAAGAAGAATAATAAATTCAGGAGCTGGCACAGGTTGAACTGTCTATCCACCACTATCATCAAATTTATCCCACCTAGGAAGATCAGTAGATTTAACTATTTTTTC…
RRSSC6588-15|Harpalus	353	66	0	85	5	3	24	18	19	11	11	39	14	15	12	11	8	25	15	7	4	AACTCTTTATTTTATTTTTGGAGCATGAGCAGGAATAGTAGGAACTTCATTAAGTTTACTTATTCGGGCAGAATTAGGAAGCCCTGGATCTTTAATTGGAGATGATCAAATTTATAACGTTATTGTTACAGCTCATGCTTTTATCATAATTTTCTTTATGGTTATACCTACTGTAATTGGTGGATTTGGAAATTGATTAGTACCTTTGATATTAGGAGCTCCTGATATAGCTTTTCCTCGAATAAACAACATAAGATTTTGATTACTCCCCCCATCATTATCTTTGTTGTTAATAAGAAGAATAGTAGAAAGAGGTGCAGGAACTGGATGAACAGTTTACCCTCCTCTATCATCAAATATTGCCCATAGAGGAGCTTCAGTTGATTTAGCAATTTTTAG…
RRMFG2769-15|Trypoxylon	0	25	74	9	0	11	43	55	53	2	12	24	2	40	13	2	21	64	10	10	12	AACCTTATATTTTATTTTTGGAGCATGATCAGGGTCTCTTGGACTAGCTTTGAGACTTTTAATTCGAGCAGAATTAGGAACTCCAGGAACTTTAATTGGAAATGATCAAATTTATAACGTAATTGTTACAGCCCACGCCTTTATTATAATTTTCTTTATAGTTATACCTATTATAATTGGGGGATTCGGAAATTGGTTAGTACCTTTGATACTAGGAGCCCCTGATATAGCATTTCCCCGTATAAATAACATAAGATTTTGATTTTTACCGCCTTCTCTTATATTTTTATTAATAAGAAGAATAGTAGAAAGAGGAGCGGGAACAGGATGAACTGTTTATCCCCCTCTATCAGCTAATATTGCTCATAGAGGACCATCAGTTGATTTAGCAATTTTTAG…
RRSSC1834-15|Hydrophoria	0	0	0	0	0	0	0	0	0	0	0	3	4	0	228	3	0	111	1	0	0	AACATTATATTTTATTTTTGGAATTTGAGCAGGTATAGTAGGAACCTCTTTAAGATTACTAATTCGAGCTGAATTAGGAAACCCCGGATCTTTAATTGGTGATGATCAAATTTATAATACTATTGTTACAGCTCATGCTTTTATTATAATTTTTTTTATAGTTATACCTATTATAATTGGAGGATTTGGAAACTGACTTGTGCCTTTAATATTAGGAGCTCCAGATATGGCTTTCCCACGAATAAATAATATAAGATTTTGATTGCTCCCCCCCTCATTAACTTTATTAATTTCAAGAAGAATTGTAGAAAATGGTGCAGGAACAGGATGAACAGTTTATCCCCCACTTTCATCTAATATTGCCCATGGAGGAAGTTCTGTAGATTTAGCTATCTTTTC…
RRMFI4181-15|Casinaria	11	4	121	49	24	8	23	28	34	0	0	0	2	12	18	6	34	12	2	1	2	AATACTATACTTCATTTTTGGTGCCTGGGCAGGAATAGTTGGAACTTCCCTAAGTTTATTAATTCGATCAGAACTTGGTAATCCTGGATCTTTAATTGGAAATGATCAAATTTATAATGTTATTGTTACAGCTCATGCTTTTATTATAATTTTCTTTATAGTTATACCAGTTATAATTGGTGGATTTGGAAATTGATTAGTCCCTCTAATACTCGGGGCCCCAGATATGGCTTTCCCTCGATTAAACAATATAAGATTTTGATTATTACCCCCATCATTAACTTTACTAATTATAAGAAGAGCAGTTGAAAGAGGAGCAGGAACAGGTTGAACAGTTTATCCCCCTCTTTCTTCTAATATTGCCCATGGAGGTTCATCTGTTGATTTAGCTATTTTTAG…
RRMFE3056-15|Podoschistus	8	7	94	36	25	9	11	13	3	4	0	5	7	8	10	12	36	5	2	3	2	AACATTATATTTTATTTTTGGAGCTTGAGCAGGAATAATTGGAACTTCATTAAGAATTATTATTCGAGCTGAATTAGGTCACCCAGGTAACTTAATTGGTAATGACCAAATTTATAATATAATTGTCACATCTCATGCTTTTGTAATAATTTTCTTTATAGTTATACCAATTATAATTGGAGGATTTGGAAATTGACTAGTACCCCTTATACTAGGAGCTCCTGACATAGCATTCCCTCGAATAAACAATATAAGTTTTTGATTATTGCCCCCATCCCTTACATTATTACTCATCAGCAGTATAGTAGAAACTGGAACTGGAACAGGTTGAACAATTTACCCTCCTCTTTCATCTACTATTGCACATAGAGGGGCATCTGTTGACTTAGCTATTTTTTC…
RRSSC6325-15|Ceratina	0	61	175	0	1	29	4	9	9	9	7	0	0	6	1	0	4	11	8	3	2	AACATTATATTTTATTTTAGGTAGATGATCAGCAATAATCGGAACTTCAATAAGATTAATTATCCGGACAGAATTAGGAAGGCCTGGTTCTTTAATTGGAGATGACCAAATCTATAATGTTGTTGTAACTGCTCATGCTTTTATTATAATTTTTTTTATAGTGATACCCATTATAATTGGGGGATTCGGAAATTGACTAGTACCCCTAATATTAGGAGCTCCTGATATAGCTTTTCCACGAATAAATAATATAAGATTTTGATTACTCCCCCCCTCATTAACATTATTAATTATAAGAAGAATTGTAGAAAACGGAGCAGGAACTGGATGAACAGTTTATCCTCCTCTATCATCAAATTTAACTCATAGAGGATCATCAGTAGATTTAGCTATTTTTAG…
RRMFA257-15|Nomada	0	15	0	83	18	20	11	15	15	9	61	0	4	13	7	0	9	1	1	4	1	AACTTTATATTTTATCTTTGGAGCTTGAGCAGGCATACTAGGAACTTCCTTAAGAATATTAATTCGTGCAGAATTAGGACATCCTGGCTCTTTACTTGGCAATGATCAAATTTATAATGTAATCGTGACTGCCCACGCTTTCATTATAATTTTTTTTATAGTAATACCAATTATAATTGGTGGATTTGGAAATTGATTAGTTCCTTTAATATTAGGAGCTCCTGATATAGCTTTTCCTCGAATAAATAATATAAGATTTTGAATGCTGCCACCTTCATTAACTTTATTATTAATAAGAAGAATAGTTGAAAATGGAGCTGGGACAGGATGAACTGTCTACCCTCCTTTATCTAGAACCCTATCCCATAGAGGAGGATCTGTTGACTTAGCTATTTTTTC…
RRSSA3945-15|Theronia	292	3	35	110	1	1	0	0	1	0	0	0	1	2	0	0	2	0	1	0	0	AACATTATATTTTATTTTTGGAGCTTGATCAAGAATAATTGGAACTTCTTTAAGTATATTAATTCGAGTAGAATTAGGTCACCCTGGTTCTTTAATTGGAAATGATCAAATTTATAATGTAATTGTAACTGCTCATGCTTTTATTATAATTTTTTTTATAGTTATACCAATTATAATTGGTGGATTTGGAAATTGATTAGTTCCTTTAATATTAGGAGCTCCAGATATAGCTTTTCCTCGTATAAATAATATAAGTTTTTGACTCCTTCCTCCTGCTTTAATACTTTTATTAACAAGCAGTATAGTAGAAAGTGGAGCTGGAACAGGTTGAACAGTTTACCCCCCTCTATCTTCTATTATTGCTCATGGAGGAGCTTCTGTTGATTTAGCTATTTTTTC…
RRMFG2694-15|Cryptus	0	46	0	0	1	23	8	9	6	32	39	17	13	7	13	0	1	0	10	1	3	AACTTTATATTTTATTTTCGGAGCATGATCAGGAATAGTAGGAACTTCATTGAGAATTTTAGTTCGAGCTGAATTAGGTCATCCTGGAGCATTAATTGGAGATGATCAAATTTATAATGTAATTGTAACAGCTCATGCTTTTATTATAATTTTTTTTATAGTAATACCTATTATAATTGGAGGATTTGGAAATTGATTAGTTCCACTTATATTAGGTGCTCCTGATATAGCTTTTCCACGTATAAATAATATAAGTTTTTGACTTTTACCTCCTGCATTAACTTTATTATTACTAAGTAGTATAGTAGAAAATGGAGCTGGTACAGGATGAACTGTTTACCCTCCTCTGTCTTCTAATATTGCTCATAGAGGAGCTTCTGTTGATTTAGCCATTTTTTC…
RRGCO300-15|Argyresthia	71	8	69	14	2	22	6	15	1	1	44	5	4	9	7	2	12	2	2	0	0	AACATTATATTTTATTTTTGCTTTATGGGCAGGGACTTTAGGAGCTTCAATAAGAATAATTATTCGCTTAGAATTAAGATCTCCTGGGGCCTTAATTAATAATGATCAAATTTATAATACAATTATTACAGCTCATGCCTTTATTATAATTTTCTTTATAGTTATACCTTTTTTAGTAGGAGGATTTGGAAACTGATTAATCCCTTTAATACTAGGTGTACCTGATATAGCATTTCCTCGAATAAATAATATAAGATTTTGATTACTCCCTCCTTCATTATTTTTACTAATTTTAAGAAATTTTATTGGAACAGGGGTAGGAACAGGATGAACTTTATACCCTCCTTTATCTTCTATTGTTGGTCATGATTCTCCATCTGTAGATTTAGGAATTTTTTC…
RRSSC6599-15|Onthophagus	2	19	3	43	9	5	8	6	11	0	8	35	3	7	3	4	3	0	0	2	9	AACATTATATTTTATTTTTGGAGCTTGAGCAGGAATAGTGGGAACTTCTTTAAGAATTTTAATTCGAGCTGAATTAGGACACCCTGGAGCTCTTATTGGTGATGATCAAATTTATAACGTAATTGTAACAGCTCATGCTTTTATTATAATTTTTTTTATAGTAATACCTATTATAATTGGAGGATTTGGAAACTGATTAGTTCCTCTTATATTAGGAGCCCCTGATATAGCTTTTCCTCGGATAAATAATATAAGTTTTTGACTTTTACCTCCTGCACTAACTTTACTATTAGTAAGTAGTATAGTAGAAAACGGAGCTGGAACTGGATGAACTGTTTATCCTCCATTATCTTCTAATATTGCTCATGGAGGAGCTTCTGTTGATTTAGCTATTTTTTC…
RRSSC4975-15|Halictus	0	24	6	43	24	3	7	8	3	0	0	5	7	18	3	6	10	3	3	0	2	AACATTATATTTTATTTTTGGAGCTTGAGCTGGAATAGTCGGAACTTCTTTAAGTATATTAATTCGATTAGAATTAGGACATCCAGGAGCATTAATTGGTAATGATCAAACTTATAATGTTGTAGTTACAGCTCATGCTTTTATTATAATTTTTTTTATAGTAATACCAATTATAATTGGTGGATTTGGAAATTGATTAGTTCCTTTAATATTAGGAGCTCCAGATATAGCTTTCCCACGAATAAATAATATAAGTTTTTGATTACTTCCTCCTTCTTTAACATTATTATTAATAAGAAGTATAGTTGAAAATGGAGCTGGAACAGGATGAACCGTATATCCTCCTTTATCTTCAAATATTGCTCATAGAGGATCTTCAGTTGATTTAGCTATTTTTTC…
RRMFA256-15|Nomada	0	21	0	44	7	6	3	7	7	11	43	0	0	7	3	0	8	5	1	1	1	AACTTTATATTTTATTTTTGGTATTTGAGCAGGTATAATTGGTACTTCTTTAAGTTTATTAATTCGAGCTGAATTAGGAAACCCTGGATCTTTAATTGGAGATGACCAAATTTATAATACTATTGTAACAGCTCATGCTTTCATTATAATTTTTTTTATAGTTATACCAATTATAATTGGAGGATTTGGAAATTGATTAGTGCCATTAATACTAGGAGCTCCAGACATAGCTTTCCCACGAATAAATAATATAAGATTTTGATTATTACCCCCCTCAATTATAATCTTAATCTCAAGAAGAATTGTAGAAAATGGAGCTGGAACTGGATGAACTGTATACCCTCCTTTATCATCTAATATTGCTCATGGAGGAAGATCTGTTGATTTAGCTATTTTTTC…
RRSSA4328-15|Hylaeus	0	37	1	1	17	7	5	11	8	0	0	1	1	14	5	2	30	1	1	0	0	AACTTTATATTTCATTTTTGGAGTATGATCCGGCCTCTTAGGAACTTCATTAAGGGTAATCATTCGAACTGAACTTGGCACAATTAGATCTTTAATTAAAAATGACCAAATCTATAATGTAATAGTAACTGCCCATGCATTTATTATAATTTTTTTTATAGTAATACCTATTATAATTGGAGGGTTTGGAAACTGACTTGTTCCCCTAATACTAGGCGCACCAGACATAGCTTTCCCTCGAATAAATAATATAAGATTTTGACTACTTCCCCCTTCTTTAAATTTTCTTCTTCTTAGAAGAATAGTAGAAAGTGGAACCGGAACTGGTTGAACTGTATACCCCCCACTCTCTAGAAACATTGCTCACACAGGAGCTGCTGTTGACCTTTCAATTTTTTC…
RRSSC6591-15|Tasgius	59	4	3	0	1	1	0	0	0	0	20	1	0	2	4	0	11	7	0	1	0	AACTTTATATTTTATTTTTGGAATTTGAGCAGGAATAGTAGGAACTTCATTAAGATTATTAATTCGAGCTGAATTAGGAACTCCTGGATCTTTAATTGGAGATGATCAAATTTATAATACTATTGTAACAGCTCATGCATTTATTATAATTTTTTTTATAGTAATACCTATCATAATTGGAGGATTTGGAAATTGATTAATTCCTTTAATATTAGGAGCTCCTGATATAGCTTTCCCTCGAATAAATAATATAAGTTTTTGATTATTACCTCCTTCTCTTACTCTTTTAATTTCTAGAAGAATTGTAGAAAATGGTGCAGGAACAGGATGAACAGTTTATCCCCCACTTTCATCTAATATTGCCCATGGAGGAAGATCTGTAGATTTAGCTATTTTTTC…
RRSSC2094-15|Agrypon	38	0	11	11	4	1	2	3	3	20	2	0	0	1	0	0	1	0	0	0	0	AACTTTATATTTTATTTTAGGAAGATGGGCTGGAATAATTGGAACTTCAATAAGTTTATTAATTCGTACAGAATTAGGAAATTCTGGCTCTTTAATCGGGGATGATCAAATTTATAATGTTATTGTTACTGCGCATGCTTTTATTATAATTTTTTTTATAGTTATACCAATTATAATCGGAGGATTCGGAAATTGATTAGTTCCTTTAATGTTAGGAGCTCCTGATATAGCTTTTCCACGAATAAATAATATAAGATTTTGATTATTACCTCCTTCTTTAACTTTATTAATTATAAGAAGAGTTGTTGAAAATGGTGCAGGGACTGGATGAACAGTCTATCCCCCCTTATCTTCAAATATTGCACATAGAGGATCTTCTGTAGATTTGGCAATTTTTAG…
RRSSC5051-15|Hylaeus	0	3	0	0	3	5	3	3	5	0	4	0	7	7	0	4	12	2	2	0	0	AATTTTATATTTTTTATTTGGAATATGATCAGGAATAATTGGGTTATCAATAAGAATTATTATTCGTATAGAATTAAGTCAATCTGGTTCATTAATTGGAAATGATCAAATTTATAATAGATTTGTTACTACTCATGCTTTTATTATAATTTTTTTTATAGTTATACCAACTATATTAGGAGGATTTGGTAATTGATTAATTCCTTTAATATTAGGAAGAGTTGATATAGCTTTTCCTCGAATAAATAATATAAGATTTTGATTATTAATTCCTTCTTTATTATTATTATTATTAAGAGGATTTATAAATATTGGAGTAGGTACTGGATGAACTGTTTATCCTCCTTTATCTTTAAATATTAGACATATAGGTATATCAGTTGATATAGCTATTTTTTC…
RRGCO751-15|Homosetia	19	13	2	6	5	2	0	1	3	4	5	1	0	2	1	1	2	2	0	1	1	AACATTATATTTTATTTTTGGTATTTGAGCTGGAATAGTTGGAACTTCATTAAGATTATTAATTCGAGCTGAATTAGGAAATCCTGGATCTTTAATTGGAGATGATCAAATTTATAATACTATTGTTACAGCTCATGCTTTTATTATAATTTTTTTTATAGTTATACCTATTATAATTGGAGGATTTGGAAATTGACTTGTACCCTTAATATTAGGAGCTCCTGATATGGCATTTCCTCGAATAAATAATATAAGTTTTTGACTTCTTCCACCTTCTTTAACCTTATTAATTTCAAGAAGAATTGTAGAAAATGGAGCAGGAACAGGATGAACAGTTTACCCCCCACTTTCATCTAATATTGCTCACGGAGGAAGATCAGTAGACTTAGCTATTTTTTC…
RRSSA2321-15|Aleiodes	0	9	29	0	7	0	0	1	0	0	1	0	0	4	1	0	7	1	1	0	0	AACCTTATATTTTATTTTCGGAGCATGATCTGGAATAGTAGGAACTTCCTTAAGAATATTAGTACGAGCAGAATTAGGTCATCCTGGAGCATTAATTGGAAATGACCAAATTTATAATGTAATTGTAACAGCTCATGCTTTTATTATAATTTTTTTTATAGTTATACCAATTATAATTGGTGGATTTGGAAATTGACTAGTCCCTTTAATGTTAGGAGCCCCAGATATAGCCTTCCCTCGAATAAATAATATAAGATTTTGACTTTTACCTCCTGCTCTTACTCTTTTATTGGTGAGTAGTATAGTAGAAAATGGAGCTGGAACAGGATGAACTGTTTATCCCCCTCTATCTTCTAATATTGCTCATGGAGGAGCTTCTGTAGATTTAGCTATTTTTTC…
RRMFG2766-15|Dusona	2	10	0	9	0	2	3	5	3	0	0	1	1	7	3	1	2	5	1	0	0	TATACTATATTTTATTTTTGGAATATGAGCTGGTATAATTGGATCTTCACTAAGAATAATTATTCGAATAGAATTAGGAAATCCTGGATTTCTAATTAATAATGATCAAATCTATAATTCAATCGTTACAAGTCATGCCTTTATTATAATTTTTTTTATAGTAATACCTATTATAATTGGAGGTTTTGGTAATTGATTAATTCCTCTTATATTAGGAGCTCCTGATATAGCATTCCCTCGAATAAATAATATAAGTTTTTGATTATTACCTCCATCAATTTTTCTATTATTAAATAGTAATATTATAAATCAAGGAACTGGAACTGGATGAACATTATATCCACCTTTATCTTCAAATTTAAATCATGAAGGAATTTCAGTAGATTTAACAATTTTCTC…
RRMFG2688-15|Nomada	0	11	0	15	1	4	0	0	0	0	11	0	0	6	0	0	1	0	0	0	0	AACTTTATATTTTTTATTTGGAACATGAGCTGGAATAGTAGGAACATCCTTAAGAATTTTAATTCGTGCAGAATTAGGTCATCCTGGAGCATTAATTGGGGATGATCAAATTTATAATGTAATTGTTACTGCTCATGCTTTTGTAATAATTTTTTTTATAGTAATACCAATTATAATTGGAGGATTCGGAAATTGATTAGTTCCATTAATATTAGGAGCACCTGATATAGCATTTCCTCGAATAAATAATATAAGTTTTTGATTATTACCTCCTTCTTTAACTTTATTATTAGTAAGAAGAATAGTAGAAAATGGAGCTGGAACTGGTTGAACAGTTTACCCTCCTTTATCTGCAAGAATCGCTCATGGAGGAGCTTCAGTTGATCTAGCAATTTTTTC…
RRMPG967-15|Pemphredon	0	0	1	43	2	0	1	1	0	1	1	0	0	1	0	0	1	0	0	0	0	TACATTATATTTTATTTTTGGGGCTTGAGCCGGAATAATTGGAACTTCATTAAGAATTTTAATTCGGGCCGAATTAGGACACCCTGGGGCATTAATTGGGGATGATCAAATTTATAATGTTATTGTAACTGCCCATGCATTTATTATAATTTTTTTTATAGTTATACCTATTATAATTGGAGGTTTTGGAAATTGATTAGTTCCACTTATACTAGGAGCCCCTGATATAGCATTTCCACGAATAAATAATATAAGTTTTTGAATACTTCCCCCTTCTTTAACATTATTATTAGCCAGTAGTATGGTTGAAAATGGTGCTGGAACAGGTTGAACAGTTTATCCCCCACTATCTGCTGGAATTGCCCATACTGGAGCTTCTGTAGATCTTGCTATTTTTTC…
RRMFG2666-15|Erigorgus	9	3	0	19	3	0	0	0	1	1	5	0	0	1	1	0	0	0	0	0	0	CACTCTATATTTTATTTTTGGAGCTTGAGCAGGATTAGTAGGTACTTCTTTAAGAATAATTGTACGATTAGAATTAAATCATCCTAATTCATTTATTGGAAATGACCAAATTTATAACTCAATTGTAACCGCCCATGCATTTATTATAATTTTTTTTATAGTAATACCTATTATAATTGGAGGATTCGGGAATTGATTAATTCCCCTAATATTAGGAGCTCCTGATATAGCTTTTCCTCGAATAAATAATATAAGATTTTGATTACTTCCACCTTCCATTACATTACTATTACTAAGCAGAATAATCGAAAATGGAGTAGGTACAGGATGAACTGTTTATCCTCCCTTATCAGCATCTATTGCTCACAGAGGAGCATCTGTTGATTTAGCAATCTTCTC…
RRGCO481-15|Acrocercops	9	11	2	0	0	0	1	0	0	0	0	0	0	3	0	0	0	2	0	0	2	AACCCTATATTTAATGTTCGGAGCATGAGCAGGTATAGTAGGAACTGCTTTAAGAATATTAATTCGAGTTGAACTCGGACAACCAGGATCTCTAATTGGAGATGATCAAATTTATAATGTAGTAGTAACTGCACACGCTTTTGTTATAATTTTTTTTATAGTAATACCAATCATAATTGGTGGGTTCGGAAATTGGTTAGTACCACTAATATTAGGGGCACCAGATATGGCTTTCCCTCGATTAAATAATATAAGATTTTGACTCTTACCTCCATCTTTAACCCTTCTTCTAGCAAGAAGATTAGTAGAAAGAGGAGCTGGAACTGGTTGAACTGTTTACCCTCCGTTAGCAGGAGTTATTGCTCATGCTGGAGCGTCAGTAGATTTAACAATTTTTTC…
RRMPG954-15|Oswaldia	0	0	0	0	0	0	0	0	0	0	0	0	0	0	0	0	0	0	0	0	0	TACATTATATTTTATTTTTGGAGCTTGAGCAGGAATAGTAGGAACCTCTCTTAGTATAATAATTCGGGCCGAATTAGGACATCCCGGATCTTTAATTGGTGATGATCAAATTTATAATGTAATTGTTACTGCCCATGCATTTATTATAATTTTCTTTATAGTTATACCTATTATAATTGGAGGATTTGGTAATTGATTAGTTCCCTTAATATTAGGGGCTCCTGATATAGCATTTCCTCGAATAAATAATATAAGTTTCTGAATACTTCCTCCTTCTTTAACCCTTTTGTTGGCAAGTAGTGTAGTAGAAAATGGAGCTGGAACAGGATGAACTGTATATCCTCCCCTATCAGCTAGAATTGCTCATGGTGGAGCTTCAGTTGATTTAGCAATTTTTTC…

## Sheet: C) Run II; Malaise Trap
BIN	1	2	3	4	5	6	7	8	9	10	11	12	13	14	15	16	17	18	19	20	21	phylum	class	order	family	subfamily	genus	species
BOLD:AAP8739	16965	52776	992	21482	105432	9704	52018	46203	35174	8143	61460	58831	141819	42688	42934	176972	101612	32497	147629	119775	28148	Arthropoda	Insecta	Diptera	Platystomatidae	Platystomatinae	Rivellia	Rivellia steyskali
BOLD:AAG6743	8389	24570	560	16536	52023	12106	11019	12278	9548	216	3326	19100	27372	20442	19496	28416	26087	12091	14033	18988	15248	Arthropoda	Insecta	Diptera	Sarcophagidae	Sarcophaginae	Sarcophaga
BOLD:AAH2302	13998	17361	1965	14647	13786	1406	5774	4935	3593	3089	346	12756	9929	8029	10334	6522	4803	15725	3464	38995	42752	Arthropoda	Insecta	Diptera	Asilidae	Laphriinae	Laphria
BOLD:AAG1711	23749	11781	17068	10951	2002	20489	11978	12640	17002	41194	8093	3922	317	6644	4483	378	1373	1751	5446	9395	12923	Arthropoda	Insecta	Diptera	Muscidae	Phaoniinae	Helina
BOLD:AAA7470	25437	6437	3019	9772	467	9974	5932	7944	6935	1007	14808	13913	10476	7470	5225	845	1674	4179	5330	30061	35525	Arthropoda	Insecta	Diptera	Calliphoridae	Luciliinae	Lucilia
BOLD:AAG4565	4581	12093	27771	7333	1278	10896	5555	5819	4400	3216	4913	5624	4297	5013	3148	374	1137	1422	3908	21579	44297	Arthropoda	Insecta	Diptera	Tabanidae	Chrysopsinae	Chrysops	Chrysops aberrans
BOLD:AAH3035	3357	6542	39811	1108	5799	4864	4492	3568	4355	638	3088	5215	3	4005	3604	573	2071	18342	8700	21305	14236	Arthropoda	Insecta	Diptera	Calliphoridae	Calliphorinae	Pollenia
BOLD:AAD2041	486	6252	7806	5294	3825	17625	10989	9923	14579	381	3384	10386	10934	5778	5511	30	11624	3687	2716	53	7369	Arthropoda	Insecta	Diptera	Dolichopodidae	Sciapodinae	Condylostylus
BOLD:AAX1264	4333	1203	7218	3898	1878	4736	2859	2718	3269	2018	2956	6697	13	1678	1063	474	907	12885	1997	32050	24953	Arthropoda	Insecta	Diptera	Asilidae	Trigonomiminae	Holcocephala	Holcocephala abdominalis
BOLD:AAB6702	0	3084	0	24665	15354	1759	2900	2162	3123	0	672	1902	13939	5778	6859	22	5347	17	2750	86	23076	Arthropoda	Insecta	Coleoptera	Cerambycidae	Cerambycinae	Clytus	Clytus ruricola
BOLD:AAA6017	20314	2473	3481	6797	555	5373	5702	6587	7304	292	6616	3577	3934	5270	3154	618	1382	1506	2905	8724	14264	Arthropoda	Insecta	Lepidoptera	Erebidae	Arctiinae	Ctenucha	Ctenucha virginica
BOLD:AAZ5506	5871	7893	6	4359	3525	4504	6690	6944	6814	450	624	9186	4316	4366	4138	2260	2081	24	235	15002	17177	Arthropoda	Insecta	Diptera	Dolichopodidae	Dolichopodinae	Dolichopus
BOLD:AAA9808	8402	5603	9204	3292	1728	3193	2764	3625	2064	1352	2401	4187	3135	10226	10983	720	10751	5562	2747	541	5007	Arthropoda	Insecta	Lepidoptera	Sphingidae	Macroglossinae	Darapsa	Darapsa myron
BOLD:AAD0711	6992	4543	603	6868	159	10921	6094	5366	7503	356	1977	5944	3836	3800	2876	381	356	11	1565	8418	8800	Arthropoda	Insecta	Diptera	Calliphoridae	Luciliinae	Lucilia
BOLD:AAG9640	10	2523	13349	3598	1114	3288	2201	2025	950	20023	1689	3218	1692	1414	1139	775	1921	1559	178	8493	13133	Arthropoda	Insecta	Diptera	Dolichopodidae	Sciapodinae	Condylostylus	Condylostylus patibulatus
BOLD:AAF6064	5937	6515	0	5560	688	9920	5302	5532	6420	3194	1104	2495	3222	4465	4109	1695	2179	208	1407	2430	3111	Arthropoda	Insecta	Coleoptera	Lampyridae	Photurinae	Photuris
BOLD:ABV1414	6	1618	0	5229	587	136	2992	2715	1076	18197	352	3403	2624	3464	4051	5504	1272	0	859	11185	9806	Arthropoda	Insecta	Diptera	Dolichopodidae	Dolichopodinae	Gymnopternus	Gymnopternus barbatulus
BOLD:AAM9214	298	1183	62	4491	963	70	743	613	79	8241	6524	2195	8	7847	4312	4887	2653	10474	2565	8161	7983	Arthropoda	Insecta	Diptera	Sciomyzidae	Sciomyzinae	Tetanocera	Tetanocera annae
BOLD:AAB5969	4283	3315	7460	2797	1524	6627	4827	5265	7250	165	4022	1613	1695	2747	2338	2279	4708	1617	2628	2225	3850	Arthropoda	Insecta	Lepidoptera	Noctuidae	Noctuinae	Loscopia	Loscopia velata
BOLD:AAP8752	277	105	2557	1582	1056	1661	2900	2940	3869	52	597	4799	580	737	318	87	520	5212	1293	22843	16974	Arthropoda	Insecta	Diptera	Stratiomyidae	Sarginae	Sargus	Sargus fasciatus
BOLD:AAA2812	796	6746	38	1402	891	6259	7750	8907	8483	33	673	137	1382	6166	4849	491	7055	1208	920	199	106	Arthropoda	Insecta	Lepidoptera	Nymphalidae	Nymphalinae	Phyciodes
BOLD:AAP8989	203	530	1494	5546	739	1341	1198	1420	1377	27098	9181	1882	893	902	1134	1194	691	361	285	3348	3074	Arthropoda	Insecta	Diptera	Micropezidae	Calobatinae	Compsobata	Compsobata univitta
BOLD:AAG9629	6	1861	13	2823	1226	718	2987	2883	2296	2312	125	1896	52	11643	6309	1917	3105	148	396	7202	10211	Arthropoda	Insecta	Diptera	Dolichopodidae	Dolichopodinae	Dolichopus
BOLD:AAA9748	2852	12247	0	1425	314	3937	7320	6205	5769	52	1025	988	344	4050	2067	581	1438	140	473	1223	6812	Arthropoda	Insecta	Trichoptera	Phryganeidae	Phryganeinae	Ptilostomis	Ptilostomis ocellifera
BOLD:AAH2332	233	384	99	2307	1107	1655	891	1428	827	16557	2678	3385	777	2393	2458	2401	733	7	365	4014	7759	Arthropoda	Insecta	Diptera	Asilidae
BOLD:AAB7030	4755	3323	607	15460	697	1712	1760	2211	2195	142	661	1418	1179	2154	1941	1865	859	0	686	2325	6015	Arthropoda	Insecta	Diptera	Chironomidae	Chironominae	Chironomus
BOLD:AAH7139	3932	2271	166	872	3619	1719	2934	2952	3587	700	20	2997	490	2984	3239	1937	3840	6367	1834	2252	2254	Arthropoda	Insecta	Diptera	Sarcophagidae	Sarcophaginae	Boettcheria	Boettcheria bisetosa
BOLD:AAY6730	0	4732	0	3	4246	7514	3937	3856	4770	0	337	2413	1738	2945	1318	2852	4587	1831	1943	0	1784	Arthropoda	Insecta	Hemiptera	Derbidae	Cedusinae	Cedusa	Cedusa incisa
BOLD:AAH0468	3766	1195	330	414	1350	4197	1771	1803	2980	2	6309	3678	266	2966	3444	2176	849	1290	872	5745	2954	Arthropoda	Insecta	Coleoptera	Tenebrionidae	Lagriinae	Arthromacra	Arthromacra aenea
BOLD:AAB5689	2712	828	130	1396	22	4405	1813	2451	2632	2771	18696	723	941	2532	1469	166	700	500	805	869	704	Arthropoda	Insecta	Lepidoptera	Hesperiidae	Hesperiinae	Polites	Polites themistocles
BOLD:AAG1747	242	2880	5738	191	774	4310	2530	2796	2775	78	2000	2354	0	2082	2019	143	785	10457	869	1486	2137	Arthropoda	Insecta	Diptera	Muscidae	Phaoniinae	Phaonia	Phaonia apicata
BOLD:AAI2766	3516	4420	1070	515	234	6824	4000	3762	5218	102	238	2295	297	1357	1191	170	596	4614	1100	2872	2176	Arthropoda	Insecta	Diptera	Calliphoridae	Calliphorinae	Pollenia
BOLD:AAZ6502	3626	4095	1067	1233	1508	1996	2460	2529	3844	379	1604	876	912	1820	1632	834	1900	3445	740	3521	4483	Arthropoda	Insecta	Diptera
BOLD:AAG4287	1938	140	214	4052	232	120	56	66	8	41	11	370	158	2410	648	1125	1142	230	772	20498	10143	Arthropoda	Insecta	Coleoptera	Staphylinidae	Staphylininae	Platydracus	Platydracus cinnamopterus
BOLD:AAG9668	6291	2505	16	4	2211	3516	1261	1560	2171	2	13387	587	407	1805	2314	981	2007	2240	298	4	6	Arthropoda	Insecta	Diptera	Dolichopodidae	Diaphorinae	Chrysotus
BOLD:AAH2307	0	1477	26	1533	5482	1218	2603	2010	2426	552	4792	55	878	3387	3307	0	1661	8402	554	0	388	Arthropoda	Insecta	Diptera	Asilidae
BOLD:AAD3061	2542	2197	1796	949	382	3844	2177	3103	2611	151	5181	1370	1324	1227	613	1512	3808	310	1113	1450	2812	Arthropoda	Insecta	Lepidoptera	Noctuidae	Noctuinae	Apamea	Apamea plutonia
BOLD:AAI6258	1411	658	1263	736	6942	2473	1817	2121	2635	244	499	1325	1120	1939	1811	3103	2747	1225	652	1548	2842	Arthropoda	Insecta	Lepidoptera	Gelechiidae	Dichomeridinae	Dichomeris	Dichomeris mercatrix
BOLD:ABX3317	0	1641	0	1983	543	426	505	739	65	3218	512	1574	7452	921	992	2074	687	0	0	8970	5893	Arthropoda	Insecta	Coleoptera	Mordellidae	Mordellinae	Mordellaria	Mordellaria serval
BOLD:AAA4893	2129	2340	1945	1815	403	5808	4642	4136	5241	12	1431	122	981	1464	1150	402	2308	326	431	148	113	Arthropoda	Insecta	Lepidoptera	Crambidae	Crambinae	Microcrambus	Microcrambus elegans
BOLD:AAG5453	2844	1309	4356	2680	1315	1294	1611	1618	2075	3357	1116	1400	1467	704	838	1335	930	7	635	1832	4011	Arthropoda	Insecta	Diptera	Chironomidae	Chironominae	Chironomus	Chironomus bifurcatus
BOLD:AAA4277	273	5350	381	320	244	3957	2136	2883	3292	185	8447	1557	197	1198	902	143	474	2723	677	709	506	Arthropoda	Insecta	Diptera	Syrphidae	Syrphinae	Toxomerus	Toxomerus marginatus
BOLD:AAG6746	1223	1375	138	622	347	3440	2184	2000	1651	142	3585	1863	796	2794	1844	312	593	1312	2579	2918	3288	Arthropoda	Insecta	Diptera	Calliphoridae	Luciliinae	Lucilia	Lucilia silvarum
BOLD:ABV1416	1614	284	0	1092	265	2672	1152	707	563	3885	634	2273	1506	857	688	316	348	13	200	5039	10287	Arthropoda	Insecta	Diptera	Asilidae	Laphriinae	Cerotainia	Cerotainia macrocera
BOLD:AAG4564	1334	3214	2047	1629	419	1948	1082	1289	924	1090	1450	841	115	590	434	93	308	2015	522	3569	9325	Arthropoda	Insecta	Diptera	Tabanidae	Chrysopsinae	Chrysops	Chrysops sackeni
BOLD:ACC1029	2117	858	2149	2556	163	992	628	659	528	12672	44	1271	80	1458	1567	131	338	65	59	995	3596	Arthropoda	Insecta	Diptera	Dolichopodidae	Dolichopodinae	Dolichopus
BOLD:AAA8310	1455	3190	160	1862	95	6066	2569	3275	3174	120	1539	507	508	1204	677	112	281	253	440	1095	1883	Arthropoda	Insecta	Lepidoptera	Crambidae	Spilomelinae	Anageshna	Anageshna primordialis
BOLD:AAN2931	1424	1250	8406	2280	1925	2386	1007	1151	1290	173	760	401	404	435	473	309	977	1205	214	1181	2014	Arthropoda	Insecta	Diptera	Ptychopteridae	Ptychopterinae	Ptychoptera	Ptychoptera quadrifasciata
BOLD:AAG6519	5287	1806	2788	1116	63	2208	923	1613	1378	5629	520	623	328	308	272	432	942	1226	199	771	1063	Arthropoda	Insecta	Diptera	Ceratopogonidae	Forcipomyiinae	Atrichopogon
BOLD:ADH6075	1184	1514	986	217	828	2363	1363	1699	1994	39	2537	1644	895	1485	1505	702	2421	2930	1175	855	1034	Arthropoda	Insecta	Diptera	Tachinidae	Exoristinae
BOLD:ACE5224	921	754	125	535	140	791	992	1636	1430	128	15156	480	362	1250	652	109	299	119	445	278	269	Arthropoda	Insecta	Lepidoptera
BOLD:AAB6095	1617	2233	558	359	1084	1139	1817	1975	2379	35	5460	479	484	1026	1119	291	944	1746	532	378	456	Arthropoda	Insecta	Lepidoptera	Noctuidae	Noctuinae	Neoligia	Neoligia exhausta
BOLD:AAG0263	80	1221	2	247	4428	1634	1434	1461	1129	896	1714	2545	2270	1197	1066	2220	1404	16	203	600	279	Arthropoda	Insecta	Diptera	Ulidiidae	Otitinae	Herina	Herina nigribasis
BOLD:AAG9636	1426	403	11	1589	293	876	1742	1455	1375	1593	45	1844	73	2894	2269	41	435	16	50	1600	5774	Arthropoda	Insecta	Diptera	Dolichopodidae	Dolichopodinae	Dolichopus	Dolichopus blandus
BOLD:AAC1312	2491	2665	277	117	131	1966	1811	2016	2720	50	4795	1036	185	837	802	121	323	2048	648	373	221	Arthropoda	Insecta	Diptera	Syrphidae	Syrphinae	Toxomerus
BOLD:AAG6745	1842	1496	6401	372	696	303	234	273	71	419	122	1203	23	1597	1075	156	485	724	1196	3542	2576	Arthropoda	Insecta	Diptera	Calliphoridae	Calliphorinae	Pollenia	Pollenia pediculata
BOLD:AAG4573	4688	2009	227	1280	172	2393	895	849	555	706	764	725	137	514	389	69	297	1784	418	1809	3042	Arthropoda	Insecta	Diptera	Tabanidae	Tabaninae	Tabanus	Tabanus similis
BOLD:AAA8151	998	538	270	332	117	535	1362	2117	1441	16	516	1753	903	3296	2633	1041	2430	1153	640	306	693	Arthropoda	Insecta	Lepidoptera	Noctuidae	Noctuinae	Eueretagrotis	Eueretagrotis perattentus
BOLD:AAD4375	16	912	27	1091	597	1726	1210	1359	1644	3366	352	353	284	340	325	74	284	1344	475	1419	4763	Arthropoda	Insecta	Diptera	Tabanidae	Chrysopsinae	Chrysops
BOLD:AAG9744	1761	768	21	247	881	1620	2906	2810	3090	14	56	1882	925	689	478	526	1000	556	577	632	342	Arthropoda	Insecta	Diptera	Dolichopodidae
BOLD:AAB6625	976	2032	2552	508	102	3139	1355	1763	1685	124	634	855	96	598	680	79	202	1577	284	715	1783	Arthropoda	Insecta	Lepidoptera	Gelechiidae	Dichomeridinae	Dichomeris	Dichomeris flavocostella
BOLD:AAX9417	1137	1498	46	470	5134	1045	693	696	625	2	382	1276	1130	1287	1578	1393	1617	222	702	406	364	Arthropoda	Insecta	Diptera	Sarcophagidae	Sarcophaginae	Sarcophaga	Sarcophaga polistensis
BOLD:AAB0872	811	1125	2569	443	40	1550	871	1408	1472	24	3909	472	153	1106	1253	347	1221	927	265	224	433	Arthropoda	Insecta	Lepidoptera	Noctuidae	Noctuinae	Lateroligia	Lateroligia ophiogramma
1	0	118	15178	0	10	97	150	198	888	0	9	0	0	47	27	19	71	10	4	3191	549	Arthropoda	Insecta	Hymenoptera
BOLD:AAM6781	692	193	0	7	158	321	840	724	491	0	602	2199	1249	1047	1136	766	1029	2561	64	20	6297	Arthropoda	Insecta	Diptera	Dolichopodidae	Neurigoninae	Neurigona	Neurigona tenuis
BOLD:AAB2866	3079	1303	2438	752	125	795	855	953	910	60	504	677	105	592	454	104	277	1737	574	1627	2351	Arthropoda	Insecta	Diptera	Syrphidae	Syrphinae	Melanostoma
BOLD:AAA4226	54	160	0	2032	2951	2689	1410	1294	1947	43	21	302	158	1272	1314	532	610	7	586	1217	1141	Arthropoda	Insecta	Trichoptera	Limnephilidae	Limnephilinae	Limnephilus	Limnephilus moestus
BOLD:AAH0109	3951	684	14	4207	171	67	202	298	52	4	3791	604	225	939	709	503	990	448	145	277	1003	Arthropoda	Insecta	Coleoptera	Lampyridae	Lampyrinae	Photinus
BOLD:AAV0162	0	980	31	11	686	809	306	381	515	617	84	880	0	1001	1067	1222	1696	3376	202	1589	3579	Arthropoda	Insecta	Hemiptera	Cicadellidae	Deltocephalinae	Eutettix	Eutettix variabilis
BOLD:AAH0215	1882	590	16	342	957	1190	908	2003	1177	142	619	812	517	1114	532	303	546	1261	1039	1687	960	Arthropoda	Insecta	Coleoptera	Scirtidae	Scirtinae	Scirtes	Scirtes tibialis
BOLD:AAG6756	107	2021	343	1118	468	1779	1305	1585	1386	386	41	2611	111	1275	961	13	371	41	99	201	2100	Arthropoda	Insecta	Diptera	Sarcophagidae	Sarcophaginae	Boettcheria	Boettcheria cimbicis
BOLD:AAA3453	289	1463	8	766	122	1539	807	1158	881	18	400	413	3001	1700	1234	249	405	91	964	1576	1219	Arthropoda	Insecta	Diptera	Anthomyiidae	Anthomyiinae	Delia
BOLD:AAD2272	1310	1235	109	469	133	1030	1559	1297	1395	854	303	1590	1339	759	419	147	269	365	488	1934	1258	Arthropoda	Insecta	Diptera	Sepsidae	Sepsinae	Themira	Themira minor
BOLD:ABX8545	272	18	0	631	20	375	305	364	138	1820	88	604	3043	677	801	1895	658	0	0	4413	1617	Arthropoda	Insecta	Coleoptera	Mordellidae	Mordellinae	Mordellaria	Mordellaria serval
BOLD:AAU8706	55	566	0	121	114	5127	2199	2278	2580	0	158	411	267	1949	1039	35	269	127	257	55	98	Arthropoda	Insecta	Hymenoptera	Ichneumonidae	Ichneumoninae
BOLD:AAD6445	0	3801	451	561	126	3633	2219	2634	2753	0	366	66	21	177	162	25	145	22	6	8	12	Arthropoda	Insecta	Hymenoptera	Halictidae	Halictinae	Augochlora	Augochlora pura
BOLD:AAB0651	632	2017	1207	311	1456	1528	1177	1609	2007	54	64	404	152	590	543	380	1127	1024	154	204	350	Arthropoda	Insecta	Lepidoptera	Gelechiidae	Dichomeridinae	Dichomeris
BOLD:ACD8765	244	686	4408	2072	432	191	536	634	522	2611	52	337	191	348	472	95	382	422	151	564	1584	Arthropoda	Insecta	Diptera	Dolichopodidae	Dolichopodinae	Gymnopternus	Gymnopternus spectabilis
BOLD:AAB5367	270	803	3036	396	104	453	569	812	550	115	1111	748	80	444	334	39	195	1055	218	1391	4180	Arthropoda	Insecta	Diptera	Tabanidae	Chrysopsinae	Chrysops	Chrysops vittatus
BOLD:AAP8665	0	612	141	2277	1519	57	268	278	342	4227	499	55	336	403	391	243	503	69	12	1830	2727	Arthropoda	Insecta	Diptera	Ulidiidae	Ulidiinae	Euxesta	Euxesta notata
BOLD:AAH2953	1231	227	22	362	163	692	626	744	662	916	687	1337	773	1261	933	666	1308	662	390	1079	1608	Arthropoda	Insecta	Diptera	Rhagionidae	Rhagioninae	Rhagio	Rhagio tringarius
BOLD:AAP2870	133	149	2301	430	41	161	433	388	567	5105	45	880	274	182	123	44	74	193	68	1915	2499	Arthropoda	Insecta	Diptera	Dolichopodidae
BOLD:ABX6186	328	1907	544	71	17	1927	1401	1465	2080	99	1074	596	363	447	482	460	779	1105	434	138	157	Arthropoda	Insecta	Diptera	Tipulidae	Tipulinae	Nephrotoma	Nephrotoma ferruginea
BOLD:AAG2783	7	74	3201	1310	366	158	560	584	284	3469	0	625	29	188	116	0	205	53	61	31	4391	Arthropoda	Insecta	Diptera	Therevidae
BOLD:AAA5206	790	2453	183	298	152	2244	1398	1752	1789	8	1248	536	370	569	303	114	166	240	205	210	322	Arthropoda	Insecta	Lepidoptera	Erebidae	Herminiinae	Zanclognatha
BOLD:AAM6786	1519	840	71	291	579	2441	1328	1493	1343	33	389	709	527	703	679	470	569	258	89	725	293	Arthropoda	Insecta	Diptera	Dolichopodidae
BOLD:AAV1055	678	642	0	64	661	1033	1157	1343	1785	190	1208	652	465	787	861	448	1009	841	438	108	99	Arthropoda	Insecta	Diptera	Stratiomyidae	Beridinae	Allognosta	Allognosta fuscitarsis
BOLD:AAH3040	531	557	392	252	234	387	406	463	230	4035	105	1047	95	361	420	56	149	1188	211	1882	1270	Arthropoda	Insecta	Diptera	Calliphoridae	Calliphorinae	Pollenia	Pollenia vagabunda
BOLD:ABZ1424	1396	1931	20	651	247	823	741	842	766	103	201	677	325	1040	974	7	346	1780	418	76	552	Arthropoda	Insecta	Diptera	Muscidae	Muscinae	Dasyphora	Dasyphora cyanicolor
BOLD:AAI6841	625	669	360	570	652	792	780	786	438	176	397	1640	784	950	730	106	273	1309	367	324	747	Arthropoda	Insecta	Diptera	Stratiomyidae	Stratiomyinae	Caloparyphus	Caloparyphus tetraspilus
BOLD:ABU9891	567	787	47	126	371	2057	1118	1003	1346	49	341	1191	754	892	562	58	161	322	980	319	416	Arthropoda	Insecta	Diptera	Muscidae	Phaoniinae	Phaonia
BOLD:AAK5928	254	705	4	155	326	1293	930	894	946	0	542	908	1136	1437	933	522	602	79	325	339	888	Arthropoda	Insecta	Coleoptera	Chrysomelidae	Criocerinae	Oulema	Oulema melanopus
BOLD:AAB8911	854	251	1802	154	736	1421	1102	988	1580	242	24	429	20	184	221	372	678	917	155	416	487	Arthropoda	Insecta	Coleoptera	Curculionidae	Entiminae	Polydrusus	Polydrusus formosus
BOLD:ABW2815	55	157	268	852	228	258	131	129	94	4954	240	312	202	215	369	203	363	963	104	1122	1800	Arthropoda	Insecta	Coleoptera	Mordellidae	Mordellinae	Mordellaria	Mordellaria undulata
BOLD:AAB1584	461	1133	296	1564	1327	1040	424	766	688	66	447	271	155	790	786	525	911	156	143	224	833	Arthropoda	Insecta	Lepidoptera	Crambidae	Crambinae	Crambus	Crambus albellus
BOLD:AAA6018	927	976	1615	604	454	470	505	567	372	3	621	339	277	847	778	663	1586	298	211	164	408	Arthropoda	Insecta	Lepidoptera	Geometridae	Ennominae	Tetracis	Tetracis crocallata
BOLD:AAP8833	435	445	545	331	24	983	726	1040	861	0	450	373	168	640	633	826	1970	1245	256	224	442	Arthropoda	Insecta	Diptera	Anthomyiidae	Anthomyiinae	Eustalomyia	Eustalomyia festiva
BOLD:AAD3756	1312	1110	1022	676	138	598	647	701	964	53	1180	428	366	580	450	55	131	263	357	755	769	Arthropoda	Insecta	Diptera	Syrphidae	Syrphinae	Platycheirus	Platycheirus scambus
BOLD:ACU8282	1681	1039	96	628	29	456	373	336	324	282	323	436	359	193	136	54	91	134	295	1628	3622	Arthropoda	Insecta	Diptera	Tabanidae	Chrysopsinae	Chrysops
BOLD:ACE9710	0	2614	4	1354	413	177	425	797	281	0	2	507	234	826	241	716	871	133	160	493	1861	Arthropoda	Insecta	Hymenoptera	Vespidae	Vespinae	Dolichovespula	Dolichovespula arenaria
BOLD:AAH2353	2053	990	50	453	399	467	437	393	276	165	2	433	58	984	829	80	800	62	43	672	2228	Arthropoda	Insecta	Diptera	Asilidae	Leptogastrinae	Tipulogaster	Tipulogaster glabrata
BOLD:AAP8756	294	1502	2797	2278	41	621	503	519	558	378	199	57	45	122	96	8	43	224	131	667	739	Arthropoda	Insecta	Diptera	Syrphidae	Eristalinae	Parhelophilus	Parhelophilus laetus
BOLD:AAB9024	901	363	3400	544	418	173	510	631	354	6	59	504	290	362	297	512	695	113	281	380	825	Arthropoda	Insecta	Lepidoptera	Crambidae	Pyraustinae	Crocidophora	Crocidophora serratissimalis
BOLD:ABZ2233	512	430	1350	148	38	631	683	856	975	16	2397	209	120	435	594	111	538	913	166	139	201	Arthropoda	Insecta	Lepidoptera	Noctuidae	Noctuinae	Oligia	Oligia modica
BOLD:AAF4234	961	986	230	443	137	1298	614	564	483	28	111	775	812	1231	845	195	246	333	218	388	456	Arthropoda	Insecta	Diptera	Anthomyiidae	Pegomyinae	Eutrichota	Eutrichota lipsia
BOLD:AAA4570	908	619	405	466	42	433	642	776	994	96	1629	309	160	403	344	68	218	1057	217	633	868	Arthropoda	Insecta	Diptera	Syrphidae	Syrphinae	Syrphus
BOLD:AAU3410	774	1483	21	766	867	135	475	592	385	78	84	637	390	629	545	504	635	257	68	533	1279	Arthropoda	Insecta	Diptera	Asilidae	Laphriinae	Laphria
BOLD:ACI4401	171	85	1249	530	68	707	341	414	359	2281	785	131	5	291	215	27	173	682	146	451	1719	Arthropoda	Insecta	Diptera	Chironomidae	Orthocladiinae	Pseudorthocladius
BOLD:AAP6703	566	567	3738	1400	437	39	127	137	24	1195	199	49	237	129	156	152	178	61	158	443	735	Arthropoda	Insecta	Diptera	Ceratopogonidae	Dasyheleinae	Dasyhelea
BOLD:AAG9690	219	233	24	832	201	237	630	628	559	1332	119	242	18	1971	496	87	339	11	171	685	1560	Arthropoda	Insecta	Diptera	Dolichopodidae	Dolichopodinae	Dolichopus
BOLD:AAA9811	614	914	285	266	561	1206	496	699	755	472	44	95	144	920	707	501	994	200	59	130	278	Arthropoda	Insecta	Lepidoptera	Geometridae	Ennominae
BOLD:ACV2211	1203	467	54	486	14	1271	437	535	757	417	2492	141	86	460	416	148	344	70	65	150	205	Arthropoda	Insecta	Diptera	Dolichopodidae	Diaphorinae	Chrysotus
BOLD:AAM7749	4	496	1009	253	494	2354	855	1270	1125	300	273	90	0	301	366	43	243	305	7	187	53	Arthropoda	Insecta	Coleoptera	Cantharidae	Silinae	Polemius	Polemius laticornis
BOLD:ADH6740	243	392	1100	184	184	981	597	602	648	6	1100	493	268	441	216	330	649	725	340	146	194	Arthropoda	Insecta	Diptera	Tipulidae	Tipulinae	Tipula	Tipula submaculata
BOLD:ABW8701	7678	1078	0	0	884	0	0	0	0	0	0	0	0	0	0	0	0	0	0	0	2	Arthropoda	Insecta	Coleoptera	Scirtidae	Scirtinae	Prionocyphon	Prionocyphon limbatus
BOLD:AAG2463	346	1350	35	556	183	905	650	767	853	4	340	310	138	649	473	90	329	832	269	240	294	Arthropoda	Insecta	Diptera	Anthomyiidae	Anthomyiinae	Hylemyza	Hylemyza partita
BOLD:AAC8595	18	358	5	1619	34	323	278	362	344	4117	38	137	51	203	137	30	46	9	50	512	918	Arthropoda	Insecta	Diptera	Heleomyzidae	Suilliinae	Suillia	Suillia quinquepunctata
BOLD:ABV1676	464	861	47	889	580	211	348	394	609	24	730	470	328	239	279	370	505	808	218	404	785	Arthropoda	Insecta	Diptera	Tachinidae	Exoristinae	Pseudochaeta	Pseudochaeta siminina
BOLD:AAF9028	26	2179	17	97	703	103	682	877	507	29	258	388	392	545	447	329	439	136	424	147	237	Arthropoda	Insecta	Diptera	Limoniidae
BOLD:AAG4661	613	404	1084	167	330	100	388	419	464	183	2255	129	92	169	288	156	248	435	96	376	558	Arthropoda	Insecta	Diptera	Syrphidae	Eristalinae	Xylota	Xylota quadrimaculata
BOLD:ADL0954	0	1158	112	152	78	461	1478	1259	1463	142	47	451	597	330	185	174	135	37	85	199	391	Arthropoda	Insecta	Diptera	Tipulidae	Tipulinae	Nephrotoma	Nephrotoma cornicina
BOLD:ACU8008	504	614	2448	312	34	94	158	180	77	40	503	521	338	306	178	32	89	193	434	628	1231	Arthropoda	Insecta	Diptera	Tachinidae	Phasiinae	Trichopoda	Trichopoda plumipes
BOLD:ADN2651	347	506	0	47	363	956	707	891	1258	55	480	378	260	444	467	247	536	503	250	37	55	Arthropoda	Insecta	Diptera	Stratiomyidae	Beridinae	Allognosta	Allognosta fuscitarsis
BOLD:AAB5577	1238	421	459	164	12	459	532	578	795	12	1011	226	0	375	231	37	141	670	180	551	597	Arthropoda	Insecta	Diptera	Syrphidae	Syrphinae	Syrphus
BOLD:ACK9434	278	299	1851	212	263	370	176	152	173	53	508	289	0	642	808	728	654	37	247	379	558	Arthropoda	Insecta	Hemiptera	Cicadellidae	Macropsinae	Macropsis	Macropsis ocellata
BOLD:AAG0758	685	832	270	324	86	365	286	348	128	17	687	107	2	618	434	115	330	2001	216	204	439	Arthropoda	Insecta	Coleoptera	Pyrochroidae	Pyrochroinae	Dendroides	Dendroides canadensis
BOLD:AAM6788	59	1166	3	717	252	899	1127	846	1450	10	16	156	241	216	193	121	296	69	144	235	210	Arthropoda	Insecta	Diptera	Dolichopodidae	Sciapodinae	Sciapus	Sciapus wiedemanni
BOLD:AAP7702	540	386	589	1329	40	440	389	389	442	51	315	307	274	284	170	45	84	185	250	1003	777	Arthropoda	Insecta	Diptera	Sarcophagidae	Sarcophaginae	Ravinia	Ravinia querula
BOLD:ABZ0281	510	1551	337	135	71	392	589	496	879	6	374	313	74	156	111	46	90	836	157	575	527	Arthropoda	Insecta	Diptera	Syrphidae	Eristalinae	Xylota
BOLD:AAH2416	286	256	4	546	40	349	331	378	303	623	285	105	3	321	288	14	105	369	58	723	2757	Arthropoda	Insecta	Coleoptera	Elateridae	Elaterinae	Dalopius	Dalopius vagus
BOLD:AAA8684	1084	395	813	612	226	1259	349	487	599	31	351	61	52	251	306	118	419	369	39	95	187	Arthropoda	Insecta	Lepidoptera	Erebidae	Arctiinae	Haploa	Haploa lecontei
BOLD:AAC6974	2	414	1447	429	82	496	299	163	128	955	129	605	654	280	128	61	58	105	347	566	702	Arthropoda	Insecta	Diptera	Dryomyzidae	Dryomyzinae	Dryomyza	Dryomyza anilis
BOLD:AAG1715	796	160	11	77	525	365	382	567	594	3	915	217	10	693	441	54	354	1543	77	47	66	Arthropoda	Insecta	Diptera	Muscidae	Mydaeinae	Mydaea	Mydaea detrita
BOLD:AAB8437	465	582	627	275	574	434	436	398	537	3	136	239	267	353	462	115	398	704	315	188	139	Arthropoda	Insecta	Diptera	Tachinidae	Tachininae	Actia	Actia interrupta
BOLD:AAB4657	0	121	21	945	129	36	175	92	86	1217	3203	176	165	133	103	239	74	0	127	207	394	Arthropoda	Insecta	Diptera	Chironomidae	Chironominae	Chironomus	Chironomus maturus
BOLD:AAP6355	355	49	1534	305	322	233	193	178	189	1314	58	107	122	81	130	106	209	352	124	605	973	Arthropoda	Insecta	Diptera	Empididae
BOLD:AAC2438	0	136	1198	76	35	320	242	299	219	948	395	155	0	271	304	46	79	645	219	596	1252	Arthropoda	Insecta	Diptera	Syrphidae	Syrphinae	Paragus
BOLD:AAG2898	0	483	840	48	281	773	464	468	530	2	320	326	60	343	317	188	602	922	65	70	193	Arthropoda	Insecta	Hemiptera	Cicadellidae	Deltocephalinae	Paraphlepsius
BOLD:AAG2346	681	169	598	599	134	292	148	167	215	1958	177	183	92	193	227	102	312	405	64	248	267	Arthropoda	Insecta	Diptera
[truncated: 1,156 more rows]

## Sheet: D) Run III; Gradient
ID	ArF5_40_PE	ArF5_41.6_PE	ArF5_43.7_PE	ArF5_46_PE	ArF5_48.5_PE	ArF5_50.8_PE	ArF5_53_PE	ArF5_54.7_PE	ArF5_56_PE	BF3_40_PE	BF3_41.6_PE	BF3_43.7_PE	BF3_46_PE	BF3_48.5_PE	BF3_50.8_PE	BF3_53_PE	BF3_54.7_PE	BF3_56_PE	LerayF_40_PE	LerayF_41.6_PE	LerayF_43.7_PE	LerayF_46_PE	LerayF_48.5_PE	LerayF_50.8_PE	LerayF_53_PE	LerayF_54.7_PE	LerayF_56_PE	fwh2_40_PE	fwh2_41.6_PE	fwh2_43.7_PE	fwh2_46_PE	fwh2_48.5_PE	fwh2_50.8_PE	fwh2_53_PE	fwh2_54.7_PE	fwh2_56_PE	sequ
[truncated: 374 more rows]
