# Supplementary material for: Validation of COI metabarcoding primers for terrestrial arthropods
Source: PeerJ. 2019 Oct 7;7:e7745. doi: 10.7717/peerj.7745 (PMC6786254; doi:10.7717/peerj.7745)
Supplement: Table S3 [file peerj-07-7745-s023.xls]

## Sheet: Sheet1
accession	sequencing_run	library_ID	title	Sequences
SRR8081817	mock sample	Vasco-Primer-Test	Insect mock metabarcoding sample, tested with 21 primer sets (MiSeq raw data)	24348000
SRR8082147	mock sample	1	Mock sample metabarcoding (Sample ID: 1, ZBJ-ArtF1c + ZBJ-ArtR2c)	1881389
SRR8082148	mock sample	2	Mock sample metabarcoding (Sample ID: 2, fwhF2 + fwhR2n)	1384303
SRR8082149	mock sample	3	Mock sample metabarcoding (Sample ID: 3, LepF1 + MLepF1-Rev)	1265335
SRR8082150	mock sample	4	Mock sample metabarcoding (Sample ID: 4, LCO1490 + 230_R)	1311251
SRR8082151	mock sample	5	Mock sample metabarcoding (Sample ID: 5, ArF5 + ArR5)	990790
SRR8082152	mock sample	6	Mock sample metabarcoding (Sample ID: 6, BF1 + BR2)	936486
SRR8082153	mock sample	7	Mock sample metabarcoding (Sample ID: 7, mlCOIintF + jgHCO2198)	1087131
SRR8082154	mock sample	8	Mock sample metabarcoding (Sample ID: 8, mlCOIintF + Fol-degen-rev)	958846
SRR8082178	mock sample	9	Mock sample metabarcoding (Sample ID: 9, mlCOIintF-XT + jgHCO2198)	1091137
SRR8082156	mock sample	10	Mock sample metabarcoding (Sample ID: 10, LCO1490 + Ill_C_R)	872862
SRR8082163	mock sample	11	Mock sample metabarcoding (Sample ID: 11, MZplankF2 + C_LepFolR)	1040126
SRR8082164	mock sample	12	Mock sample metabarcoding (Sample ID: 12, MhemF + dgHCO2198)	978268
SRR8082165	mock sample	13	Mock sample metabarcoding (Sample ID: 13, MLepF1 + C_LepFolR)	879674
SRR8082166	mock sample	14	Mock sample metabarcoding (Sample ID: 14, BF3 + BR2)	918986
SRR8082159	mock sample	15	Mock sample metabarcoding (Sample ID: 15, BF2 + BR2)	796630
SRR8082160	mock sample	16	Mock sample metabarcoding (Sample ID: 16, Ill_B_F + HCO2198)	664937
SRR8082161	mock sample	17	Mock sample metabarcoding (Sample ID: 17, ArF5 + Fol-degen-rev)	728791
SRR8082162	mock sample	18	Mock sample metabarcoding (Sample ID: 18, RonMWASPdeg + C_LepFolR)	858895
SRR8082169	mock sample	19	Mock sample metabarcoding (Sample ID: 19, AncientLepF3 + C_LepFolR)	728627
SRR8082170	mock sample	20	Mock sample metabarcoding (Sample ID: 20, LCO1490 + HCO2198)	288717
SRR8082180	mock sample	21	Mock sample metabarcoding (Sample ID: 21, dgLCO1490 + dgHCO2198)	368459
SRR8365220	malaise trap	Vasco-Run3	Testing 21 primer sets on a malaise trap arthropods sample - (MiSeq raw data)	16629020
SRR8365165	malaise trap	M01	Malaise trap metabarcoding (Sample ID: 1, ZBJ-ArtF1c + ZBJ-ArtR2c)	451554
SRR8365166	malaise trap	M02	Malaise trap metabarcoding (Sample ID: 2, fwhF2 + fwhR2n)	500048
SRR8365163	malaise trap	M03	Malaise trap metabarcoding (Sample ID: 3, LepF1 + MLepF1-Rev)	432653
SRR8365164	malaise trap	M04	Malaise trap metabarcoding (Sample ID: 4, LCO1490 + 230_R)	427011
SRR8365171	malaise trap	M05	Malaise trap metabarcoding (Sample ID: 5, ArF5 + ArR5)	443821
SRR8365170	malaise trap	M06	Malaise trap metabarcoding (Sample ID: 6, BF1 + BR2)	561679
SRR8365167	malaise trap	M07	Malaise trap metabarcoding (Sample ID: 7, mlCOIintF + jgHCO2198)	515518
SRR8365168	malaise trap	M08	Malaise trap metabarcoding (Sample ID: 8, mlCOIintF + Fol-degen-rev)	540616
SRR8365172	malaise trap	M09	Malaise trap metabarcoding (Sample ID: 9, mlCOIintF-XT + jgHCO2198)	519633
SRR8365173	malaise trap	M10	Malaise trap metabarcoding (Sample ID: 10, LCO1490 + Ill_C_R)	450131
SRR8365176	malaise trap	M11	Malaise trap metabarcoding (Sample ID: 11, MZplankF2 + C_LepFolR)	561465
SRR8365177	malaise trap	M12	Malaise trap metabarcoding (Sample ID: 12, MhemF + dgHCO2198)	538999
SRR8365174	malaise trap	M13	Malaise trap metabarcoding (Sample ID: 13, MLepF1 + C_LepFolR)	549464
SRR8365175	malaise trap	M14	Malaise trap metabarcoding (Sample ID: 14, BF3 + BR2)	642395
SRR8365180	malaise trap	M15	Malaise trap metabarcoding (Sample ID: 15, BF2 + BR2)	598698
SRR8365181	malaise trap	M16	Malaise trap metabarcoding (Sample ID: 16, Ill_B_F + HCO2198)	522194
SRR8365178	malaise trap	M17	Malaise trap metabarcoding (Sample ID: 17, ArF5 + Fol-degen-rev)	560820
SRR8365179	malaise trap	M18	Malaise trap metabarcoding (Sample ID: 18, RonMWASPdeg + C_LepFolR)	561260
SRR8365182	malaise trap	M19	Malaise trap metabarcoding (Sample ID: 19, AncientLepF3 + C_LepFolR)	563595
SRR8365183	malaise trap	M20	Malaise trap metabarcoding (Sample ID: 20, LCO1490 + HCO2198)	1124556
SRR8365169	malaise trap	M21	Malaise trap metabarcoding (Sample ID: 21, dgLCO1490 + dgHCO2198)	1462544
SRR8081818	gradient	Lib-grad	Insect mock metabarcoding gradient, 4 primer sets (MiSeq raw data)	23770810
SRR8082179	gradient	ArF5_40	Gradient mock sample metabarcoding, ID: ArF5, 40C	406950
SRR8082182	gradient	ArF5_41.6	Gradient mock sample metabarcoding, ID: ArF5, 41.6C	399446
SRR8082181	gradient	ArF5_43.7	Gradient mock sample metabarcoding, ID: ArF5, 43.7C	404373
SRR8082184	gradient	ArF5_46	Gradient mock sample metabarcoding, ID: ArF5, 46C	484511
SRR8082183	gradient	ArF5_48.5	Gradient mock sample metabarcoding, ID: ArF5, 48.5C	470050
SRR8082186	gradient	ArF5_50.8	Gradient mock sample metabarcoding, ID: ArF5, 50.8C	576573
SRR8082185	gradient	ArF5_53	Gradient mock sample metabarcoding, ID: ArF5, 53C	498239
SRR8082188	gradient	ArF5_54.7	Gradient mock sample metabarcoding, ID: ArF5, 54.7C	417267
SRR8082187	gradient	ArF5_56	Gradient mock sample metabarcoding, ID: ArF5, 56C	376956
SRR8082201	gradient	BF3_40	Gradient mock sample metabarcoding, ID: BF3, 40C	547414
SRR8082202	gradient	BF3_41.6	Gradient mock sample metabarcoding, ID: BF3, 41.6C	626969
SRR8082194	gradient	BF3_43.7	Gradient mock sample metabarcoding, ID: BF3, 43.7C	656037
SRR8082198	gradient	BF3_46	Gradient mock sample metabarcoding, ID: BF3, 46C	693142
SRR8082155	gradient	BF3_48.5	Gradient mock sample metabarcoding, ID: BF3, 48.5C	648777
SRR8082158	gradient	BF3_50.8	Gradient mock sample metabarcoding, ID: BF3, 50.8C	539095
SRR8082203	gradient	BF3_53	Gradient mock sample metabarcoding, ID: BF3, 53C	654895
SRR8082157	gradient	BF3_54.7	Gradient mock sample metabarcoding, ID: BF3, 54.7C	548088
SRR8082167	gradient	BF3_56	Gradient mock sample metabarcoding, ID: BF3, 56C	469462
SRR8082168	gradient	fwh2_40	Gradient mock sample metabarcoding, ID: Fwh2, 40C	500040
SRR8082197	gradient	fwh2_41.6	Gradient mock sample metabarcoding, ID: Fwh2, 41.6C	424297
SRR8082196	gradient	fwh2_43.7	Gradient mock sample metabarcoding, ID: Fwh2, 43.7C	506287
SRR8082195	gradient	fwh2_46	Gradient mock sample metabarcoding, ID: Fwh2, 46C	622410
SRR8082189	gradient	fwh2_48.5	Gradient mock sample metabarcoding, ID: Fwh2, 48.5C	633293
SRR8082193	gradient	fwh2_50.8	Gradient mock sample metabarcoding, ID: Fwh2, 50.8C	530960
SRR8082192	gradient	fwh2_53	Gradient mock sample metabarcoding, ID: Fwh2, 53C	651213
SRR8082191	gradient	fwh2_54.7	Gradient mock sample metabarcoding, ID: Fwh2, 54.7C	610186
SRR8082190	gradient	fwh2_56	Gradient mock sample metabarcoding, ID: Fwh2, 56C	680007
SRR8082200	gradient	LerayF_40	Gradient mock sample metabarcoding, ID: LerayF, 40C	571342
SRR8082199	gradient	LerayF_41.6	Gradient mock sample metabarcoding, ID: LerayF, 41.6C	655505
SRR8082171	gradient	LerayF_43.7	Gradient mock sample metabarcoding, ID: LerayF, 43.7C	594717
SRR8082172	gradient	LerayF_46	Gradient mock sample metabarcoding, ID: LerayF, 46C	647246
SRR8082173	gradient	LerayF_48.5	Gradient mock sample metabarcoding, ID: LerayF, 48.5C	713839
SRR8082174	gradient	LerayF_50.8	Gradient mock sample metabarcoding, ID: LerayF, 50.8C	726098
SRR8082175	gradient	LerayF_53	Gradient mock sample metabarcoding, ID: LerayF, 53C	702365
SRR8082176	gradient	LerayF_54.7	Gradient mock sample metabarcoding, ID: LerayF, 54.7C	653108
SRR8082177	gradient	LerayF_56	Gradient mock sample metabarcoding, ID: LerayF, 56C	605528
